# Supplementary material for: A Physiology-Based Model of Human Bile Acid Metabolism for Predicting Bile Acid Tissue Levels After Drug Administration in Healthy Subjects and BRIC Type 2 Patients
Source: Front Physiol. 2019 Sep 27;10:1192. doi: 10.3389/fphys.2019.01192 (PMC6777137; doi:10.3389/fphys.2019.01192)
Supplement: Supplementary file 1 [file Data_Sheet_1.csv]

#Project: Bile acids_July
#PK-Sim version: 7.2.1 - Build 2
IndividualId	Gender	RaceIndex	Population Name	Organism|Weight	Organism|BMI	Organism|Gestational age	Organism|Age	Organism|Ontogeny factor (alpha1-acid glycoprotein)	Organism|Ontogeny factor (albumin)	Organism|Height	Organism|Hematocrit	Organism|VenousBlood|Volume	Organism|ArterialBlood|Volume	Organism|Bone|Specific blood flow rate	Organism|Bone|Volume	Organism|Brain|Volume	Organism|Brain|Specific blood flow rate	Organism|Fat|Volume	Organism|Fat|Vf (neutral lipid)-PT	Organism|Fat|Vf (lipid)	Organism|Fat|Vf (phospholipid)-PT	Organism|Fat|Fraction interstitial	Organism|Fat|Vf (water)-PT	Organism|Fat|Vf (water)	Organism|Fat|Vf (neutral lipid)-WS	Organism|Fat|Vf (neutral lipid)-RR	Organism|Fat|Vf (neutral phospholipid, plasma)-WS	Organism|Fat|Vf (neutral phospholipid)-RR	Organism|Fat|Vf (extracellular water)-RR	Organism|Fat|Vf (intracellular water)-RR	Organism|Fat|Vf (water)-WS	Organism|Fat|Specific blood flow rate	Organism|Gonads|Volume	Organism|Gonads|Specific blood flow rate	Organism|Heart|Volume	Organism|Heart|Specific blood flow rate	Organism|Kidney|Volume	Organism|Kidney|Hill coefficient for GFR	Organism|Kidney|GFRmat	Organism|Kidney|TM50 for GFR	Organism|Kidney|Specific blood flow rate	Organism|Lumen|Effective surface area variability factor	Organism|Lumen|Stomach|Proximal radius	Organism|Lumen|Stomach|Distal radius	Organism|Lumen|Stomach|GET_alpha (Weibull function) variability factor	Organism|Lumen|Stomach|Gastric emptying time	Organism|Lumen|Stomach|Length	Organism|Lumen|Stomach|GET_beta (Weibull function) variability factor	Organism|Lumen|Duodenum|Effective surface area enhancement factor
0	1	0	pop_healthy_1000_anth	56.04282563	0.200636127	40	47.85570735	1.228493432	0.725486393	16.71303966	0.47	0.933577794	0.369778153	0.03081132	10.34618173	1.377282413	0.468932919	7.768397417	0.79	0.8	0.002	0.16	0.18	0.15	0.92	0.853	0.002024	0.0016	0.135	0.009	0.03	0.022365848	0.033181864	0.083578401	0.401331433	0.589590817	0.580754934	14.87059522	0.159670278	43.63340084	2.653353877	1.657213742	0.5	0.5	1.743585085	5.091158152	2	1.683163569	292.6883
1	1	0	pop_healthy_1000_anth	71.54854992	0.217507696	40	40.98779642	0.821284011	0.96875917	18.13690191	0.47	0.64730674	0.536463814	0.027531927	12.62983655	1.395348821	0.468417066	10.22461007	0.79	0.8	0.002	0.16	0.18	0.15	0.92	0.853	0.002024	0.0016	0.135	0.009	0.03	0.020133471	0.044868075	0.085368654	0.513853927	0.649378493	0.357790339	14.74829825	0.142722249	44.5568132	2.738183601	1.525647672	0.5	0.5	1.13366914	14.93619034	2	1.205508801	292.6883
2	1	0	pop_healthy_1000_anth	60.59757293	0.214370013	40	46.54488049	0.865650414	0.972250239	16.81301491	0.47	1.116495692	0.402111361	0.025638822	10.7707042	1.454034372	0.487137162	7.841504373	0.79	0.8	0.002	0.16	0.18	0.15	0.92	0.853	0.002024	0.0016	0.135	0.009	0.03	0.022663933	0.034847213	0.079464241	0.465288087	0.626627432	0.456402421	15.02090627	0.111741876	43.8622956	2.532967945	0.491539836	0.5	0.5	1.885620808	15.5720684	2	0.977344111	292.6883
3	1	0	pop_healthy_1000_anth	64.80733328	0.235935106	40	49.96133441	1.189375497	1.034793096	16.57355951	0.47	0.709163693	0.41155451	0.02805604	10.49863199	1.472750702	0.476504088	12.50895846	0.79	0.8	0.002	0.16	0.18	0.15	0.92	0.853	0.002024	0.0016	0.135	0.009	0.03	0.02139783	0.031353022	0.083595928	0.443686078	0.599899268	0.427937471	15.20670267	0.121935452	43.18886084	2.510328473	1.42762985	0.5	0.5	1.187501315	13.30334293	2	0.888919023	292.6883
4	1	0	pop_healthy_1000_anth	59.52115625	0.220035648	40	26.02618952	0.737545603	1.225926814	16.44709329	0.456753965	0.866695482	0.416309949	0.029038938	9.984785149	1.479459368	0.53615979	10.37030414	0.771687357	0.781455551	0.001953639	0.175895242	0.202253339	0.168544449	0.898673884	0.833226981	0.001977083	0.001562911	0.151690004	0.010112667	0.03370889	0.025486781	0.033311344	0.111303351	0.348951322	0.658316875	0.313144037	14.38366585	0.09969723	45.49328367	3.352009123	1.794822176	0.493225978	0.493225978	2.196356257	15.5132235	1.972898613	1.123162588	292.6883
5	1	0	pop_healthy_1000_anth	76.86130751	0.247706407	40	36.1554687	0.890883324	0.966577333	17.61510613	0.47	0.991763069	0.514399273	0.028561504	12.081328	1.535771096	0.529207337	22.80815842	0.79	0.8	0.002	0.16	0.18	0.15	0.92	0.853	0.002024	0.0016	0.135	0.009	0.03	0.022949789	0.038347964	0.072328059	0.26702516	0.580141687	0.403750841	14.94907041	0.16043963	44.35693094	2.878608334	0.55424545	0.5	0.5	2.197956721	15.38378993	2	0.711554535	292.6883
6	1	0	pop_healthy_1000_anth	71.66892688	0.212877039	40	42.59018079	1.199450564	1.229358153	18.34852002	0.47	0.794920262	0.335676419	0.027998932	13.36017563	1.527331888	0.496308498	11.24453696	0.79	0.8	0.002	0.16	0.18	0.15	0.92	0.853	0.002024	0.0016	0.135	0.009	0.03	0.021368982	0.038979235	0.084156909	0.517115466	0.621229596	0.305069323	14.77521579	0.147825668	44.17727067	2.608487345	1.013251731	0.5	0.5	1.539720871	14.00244772	2	0.834093671	292.6883
7	1	0	pop_healthy_1000_anth	88.12281587	0.249676634	40	28.89392987	0.823904262	1.456344835	18.78690473	0.4663131	1.043468141	0.436076789	0.02747234	13.49045254	1.478193381	0.532497654	14.66534739	0.78490286	0.794838339	0.001987096	0.164424281	0.186193993	0.155161661	0.91406409	0.847496379	0.002010941	0.001589677	0.139645495	0.0093097	0.031032332	0.023643833	0.044227013	0.07573373	0.355300506	0.606615213	0.403977396	15.01453333	0.107530872	43.51728526	3.006725963	0.839277523	0.498114519	0.498114519	0.371838902	16.5909483	1.992456602	0.878753543	292.6883
8	1	0	pop_healthy_1000_anth	64.75020818	0.208911009	40	22.59511953	1.31646694	0.923684349	17.60515778	0.445317065	0.87464863	0.375321016	0.032143312	10.92751766	1.519446884	0.555199069	10.83936841	0.755875843	0.765443891	0.00191361	0.189619522	0.221467331	0.184556109	0.880260475	0.816154549	0.001936573	0.001530888	0.166100498	0.011073367	0.036911222	0.02829909	0.028998927	0.123931282	0.421199897	0.701075613	0.470065557	14.85219235	0.110483859	43.58055267	3.531305449	1.693492607	0.487377147	0.487377147	0.79673753	14.07049805	1.949498715	1.034443173	292.6883
9	1	0	pop_healthy_1000_anth	76.66672598	0.236344184	40	55.21302335	0.837335071	0.843340447	18.01071685	0.47	1.040513143	0.380137908	0.026757741	12.45470156	1.546625383	0.457475715	9.225315205	0.79	0.8	0.002	0.16	0.18	0.15	0.92	0.853	0.002024	0.0016	0.135	0.009	0.03	0.022616987	0.03734961	0.079517448	0.570546175	0.660955742	0.198156747	14.93535568	0.066082385	45.06046156	2.134876548	2.297052385	0.5	0.5	1.556713359	30.60437117	2	1.110731412	292.6883
10	1	0	pop_healthy_1000_anth	56.01038187	0.219007026	40	57.12030444	1.063131092	0.954998904	15.99209065	0.47	0.986410057	0.504365837	0.026547341	10.05996178	1.562777086	0.503853287	13.07014951	0.79	0.8	0.002	0.16	0.18	0.15	0.92	0.853	0.002024	0.0016	0.135	0.009	0.03	0.023388168	0.034620991	0.075284362	0.318311488	0.772047871	0.419003921	15.18430642	0.159590175	45.16188683	2.005426351	1.576643822	0.5	0.5	1.047416534	29.77389266	2	0.997324515	292.6883
11	1	0	pop_healthy_1000_anth	74.74434811	0.216156854	40	24.2722884	0.91080328	1.058138388	18.59536357	0.450907628	0.971835112	0.411961717	0.029198154	12.52270196	1.594655818	0.479906647	11.09238249	0.763604796	0.773270679	0.001933177	0.182910846	0.212075185	0.176729321	0.889261281	0.824499862	0.001956375	0.001546541	0.159056389	0.010603759	0.035345864	0.027526844	0.032542146	0.122276406	0.425067829	0.662308265	0.313505549	14.89521311	0.148472057	44.51289206	3.437054383	1.162244602	0.490236161	0.490236161	0.496644931	23.06877839	1.960937007	0.830628545	292.6883
12	1	0	pop_healthy_1000_anth	78.03321692	0.230474437	40	47.22839202	0.787394489	0.914681918	18.40044705	0.47	1.068668557	0.506885603	0.025384822	13.35244972	1.681288155	0.481951253	15.26188444	0.79	0.8	0.002	0.16	0.18	0.15	0.92	0.853	0.002024	0.0016	0.135	0.009	0.03	0.021173423	0.035830808	0.080077757	0.511896316	0.659785311	0.775701479	15.16116858	0.121526621	44.54683523	2.270379064	1.270358115	0.5	0.5	0.951596994	7.664462253	2	0.956756453	292.6883
13	1	0	pop_healthy_1000_anth	79.24890446	0.218166775	40	30.13628817	0.855473518	1.029885815	19.05909733	0.47	0.977941839	0.400685167	0.027012607	14.04660976	1.540500625	0.477147439	12.41174951	0.79	0.8	0.002	0.16	0.18	0.15	0.92	0.853	0.002024	0.0016	0.135	0.009	0.03	0.023680046	0.042522144	0.079997079	0.460093813	0.625357782	0.388090431	15.26965713	0.118427974	44.34047968	2.967763221	1.163808286	0.5	0.5	1.371165428	16.32051242	2	1.722098734	292.6883
14	1	0	pop_healthy_1000_anth	70.05709778	0.211791349	40	29.88074692	1.071831497	0.996941346	18.18745631	0.46960249	1.058515493	0.462169789	0.026042889	12.6755074	1.577736149	0.532826271	7.998447249	0.789450442	0.799443486	0.001998609	0.160477012	0.180667817	0.150556514	0.919360008	0.852406617	0.002022592	0.001598887	0.135500863	0.009033391	0.030111303	0.022932881	0.04071173	0.085704495	0.4925751	0.612497816	0.595860965	14.89043805	0.152794907	43.1893589	3.020977107	0.849846705	0.499796713	0.499796713	0.610690918	15.28051604	1.999186694	1.321614482	292.6883
15	1	0	pop_healthy_1000_anth	65.46215105	0.228772103	40	28.95620771	0.928093344	1.470160184	16.91584138	0.466520692	0.892003803	0.409832596	0.030350802	10.81149634	1.52998853	0.533344166	11.71589678	0.785189857	0.795128969	0.001987822	0.164175169	0.185845237	0.154871031	0.914398315	0.847806264	0.002011676	0.001590258	0.139383928	0.009292262	0.030974206	0.023553404	0.039138273	0.083561301	0.379085502	0.66950221	0.356669421	14.85809674	0.168902718	46.12282082	3.091132154	1.227029196	0.498220682	0.498220682	0.925754822	18.96950015	1.992881337	0.616513447	292.6883
16	1	0	pop_healthy_1000_anth	76.56303851	0.228169867	40	37.36199605	0.853189039	0.913148157	18.31810042	0.47	1.010882643	0.426451474	0.026392026	12.96931503	1.608746214	0.564453384	15.88741035	0.79	0.8	0.002	0.16	0.18	0.15	0.92	0.853	0.002024	0.0016	0.135	0.009	0.03	0.021688986	0.040206054	0.076567308	0.525878788	0.663168401	0.289661304	15.15373615	0.096204596	44.93664979	2.764909892	0.767664507	0.5	0.5	1.728484141	17.70631928	2	1.027646966	292.6883
17	1	0	pop_healthy_1000_anth	70.03164021	0.222298445	40	22.2229912	1.025700878	1.119040883	17.74920626	0.444076637	0.901554207	0.37931671	0.031815617	10.85099707	1.638205089	0.56705905	15.14968917	0.754160951	0.763707292	0.001909268	0.191108035	0.223551249	0.186292708	0.878263386	0.8143029	0.001932179	0.001527415	0.167663437	0.011177562	0.037258542	0.025792503	0.026363592	0.12219009	0.428446416	0.75540829	0.471933617	14.99690681	0.122118244	44.10724367	3.411928239	1.526139993	0.486742792	0.486742792	1.471610853	42.63271433	1.9469608	1.172225272	292.6883
18	1	0	pop_healthy_1000_anth	69.40214115	0.219256258	40	35.43065048	0.967912572	1.197538917	17.79141278	0.47	0.851187945	0.450430284	0.024750307	12.20775494	1.635324859	0.493415144	11.18052517	0.79	0.8	0.002	0.16	0.18	0.15	0.92	0.853	0.002024	0.0016	0.135	0.009	0.03	0.021101444	0.040619688	0.085703636	0.429631746	0.651225691	0.605578673	14.94748951	0.123744208	43.20470772	2.752235667	0.947517021	0.5	0.5	0.22127383	19.1268544	2	0.955362611	292.6883
19	1	0	pop_healthy_1000_anth	78.35471104	0.231683782	40	27.08761547	1.233323506	1.124741262	18.39012746	0.460292052	0.966491726	0.41174733	0.028434616	12.6618672	1.578234518	0.53674542	12.05278355	0.776578761	0.786408872	0.001966022	0.171649538	0.196309353	0.163591128	0.904370203	0.83850846	0.001989614	0.001572818	0.147232015	0.009815468	0.032718226	0.022503889	0.036390468	0.095866319	0.234496215	0.664966165	0.469144546	15.1120495	0.120680462	45.60224352	3.297286903	0.843342233	0.495035355	0.495035355	1.613956746	19.66190975	1.980137538	0.835568191	292.6883
20	1	0	pop_healthy_1000_anth	54.96517332	0.19526529	40	21.06803471	1.096692136	1.033364256	16.77765563	0.440226782	0.962223578	0.385585849	0.030743158	9.921160281	1.469317097	0.544955064	4.20781569	0.748838527	0.758317495	0.001895794	0.195727861	0.230019006	0.191682505	0.87206512	0.808556029	0.001918543	0.001516635	0.172514254	0.01150095	0.038336501	0.029915039	0.026760293	0.142871062	0.268078689	0.780106569	0.399482209	14.53555962	0.078653584	44.62224656	3.491453447	0.935415468	0.484773977	0.484773977	0.590493594	12.6658439	1.939083997	0.816990408	292.6883
21	1	0	pop_healthy_1000_anth	67.59419016	0.23025523	40	44.02054492	1.258312018	0.980900827	17.13365163	0.47	0.741605077	0.424056445	0.030122717	11.31030645	1.431904811	0.496111794	15.34329807	0.79	0.8	0.002	0.16	0.18	0.15	0.92	0.853	0.002024	0.0016	0.135	0.009	0.03	0.021509636	0.036007809	0.083238623	0.439522037	0.654529717	0.475043171	14.38031485	0.105376671	43.9723946	2.726154438	1.017546127	0.5	0.5	1.179207176	10.00537731	2	0.961999294	292.6883
22	1	0	pop_healthy_1000_anth	67.98619448	0.221439516	40	38.31789239	0.705289779	0.879935792	17.52196481	0.47	0.973279715	0.453916583	0.027480499	11.4687613	1.489623288	0.504111531	9.721315228	0.79	0.8	0.002	0.16	0.18	0.15	0.92	0.853	0.002024	0.0016	0.135	0.009	0.03	0.021088488	0.04182616	0.079897508	0.219654975	0.653974752	0.590927339	14.8331602	0.142394197	43.16205693	2.857438882	1.119467152	0.5	0.5	0.439803398	16.4131403	2	1.739604795	292.6883
23	1	0	pop_healthy_1000_anth	71.59944751	0.234729528	40	33.94082642	0.988266013	1.067340299	17.46509582	0.47	1.08048456	0.45698123	0.026350799	11.80127123	1.604785924	0.515157657	9.63191147	0.79	0.8	0.002	0.16	0.18	0.15	0.92	0.853	0.002024	0.0016	0.135	0.009	0.03	0.021993353	0.041206955	0.080382313	0.474935686	0.602292969	0.305188491	13.98648792	0.114388509	44.04327904	3.050237171	0.851270459	0.5	0.5	0.352617595	9.838029996	2	1.39235833	292.6883
24	1	0	pop_healthy_1000_anth	61.97698202	0.224881058	40	26.79343164	1.249916721	1.032046389	16.60117296	0.459311439	0.868327422	0.41161722	0.029931442	10.43034399	1.519066587	0.497483248	11.53608907	0.775223064	0.785036014	0.00196259	0.172826273	0.197956783	0.164963986	0.902791416	0.83704465	0.001986141	0.001570072	0.148467587	0.009897839	0.032992797	0.025363994	0.033503863	0.096642341	0.458830559	0.648710567	0.340945212	15.29118302	0.148846696	44.51176672	3.016442419	0.449869938	0.49453387	0.49453387	2.208066311	11.53492368	1.978131204	0.773164476	292.6883
25	1	0	pop_healthy_1000_anth	62.11759882	0.223992295	40	35.20771024	1.14967331	0.857159203	16.6529351	0.47	0.849218552	0.388639237	0.028798144	11.04579069	1.432695126	0.499821246	10.41650792	0.79	0.8	0.002	0.16	0.18	0.15	0.92	0.853	0.002024	0.0016	0.135	0.009	0.03	0.020728404	0.035897788	0.088984365	0.257118121	0.65099275	0.300993896	15.28223878	0.124020336	46.89262893	3.089570166	0.304194126	0.5	0.5	1.573828502	12.58765306	2	1.345957325	292.6883
26	1	0	pop_healthy_1000_anth	77.8648464	0.230294949	40	35.88604874	0.958871503	0.767999855	18.38774657	0.47	1.030502767	0.358384299	0.028565127	12.43918105	1.647149794	0.487359906	18.06739312	0.79	0.8	0.002	0.16	0.18	0.15	0.92	0.853	0.002024	0.0016	0.135	0.009	0.03	0.022396655	0.04249904	0.0790341	0.654068674	0.626367267	0.415621139	15.28285754	0.151797672	44.46305917	2.846475955	0.877369273	0.5	0.5	0.859014754	19.27588981	2	0.923657771	292.6883
27	1	0	pop_healthy_1000_anth	72.09374092	0.243089788	40	54.26161283	1.066796677	1.069358212	17.22127982	0.47	0.79372392	0.50589287	0.028197948	10.27102993	1.369208324	0.479283985	20.59823387	0.79	0.8	0.002	0.16	0.18	0.15	0.92	0.853	0.002024	0.0016	0.135	0.009	0.03	0.021451604	0.033216871	0.076926416	0.274443842	0.637786296	0.477544861	14.36141724	0.112580412	42.67188706	2.12598912	0.536825458	0.5	0.5	2.018850481	16.41115183	2	1.148023264	292.6883
28	1	0	pop_healthy_1000_anth	59.62440525	0.223787464	40	45.76712038	0.962474282	0.95608329	16.32278096	0.47	0.998097084	0.425613317	0.027550498	9.571558618	1.550444149	0.49151037	12.30080315	0.79	0.8	0.002	0.16	0.18	0.15	0.92	0.853	0.002024	0.0016	0.135	0.009	0.03	0.022268207	0.034154254	0.079513469	0.294457569	0.586398829	0.550333415	14.69976558	0.063943125	44.39104008	2.414939883	0.692623566	0.5	0.5	3.529047602	17.70960389	2	0.69186838	292.6883
29	1	0	pop_healthy_1000_anth	81.87626614	0.239625269	40	45.00540083	0.967762887	1.008094518	18.4847128	0.47	0.78512825	0.536001308	0.028126184	13.82151112	1.571794943	0.462873232	15.62857786	0.79	0.8	0.002	0.16	0.18	0.15	0.92	0.853	0.002024	0.0016	0.135	0.009	0.03	0.020022093	0.039321847	0.083435875	0.534689595	0.681981456	0.462566825	15.09121041	0.092706228	43.151878	2.647624102	0.9052182	0.5	0.5	1.036444787	10.23238582	2	0.989820456	292.6883
30	1	0	pop_healthy_1000_anth	60.08240309	0.238090205	40	49.18851897	1.135072679	1.116694811	15.88557292	0.47	0.799056881	0.359321997	0.027294383	10.27842868	1.499318084	0.490980953	9.545488277	0.79	0.8	0.002	0.16	0.18	0.15	0.92	0.853	0.002024	0.0016	0.135	0.009	0.03	0.021384087	0.033571737	0.084126679	0.392091495	0.614544678	0.119570464	15.24141935	0.101374501	46.02309226	2.44949599	0.81745734	0.5	0.5	1.042396571	7.763604076	2	0.827255444	292.6883
31	1	0	pop_healthy_1000_anth	87.75415312	0.247633417	40	40.01658895	0.931029947	1.26110231	18.8247499	0.47	0.916683922	0.538203925	0.028283483	13.2963009	1.459293318	0.484850865	12.18052758	0.79	0.8	0.002	0.16	0.18	0.15	0.92	0.853	0.002024	0.0016	0.135	0.009	0.03	0.021497753	0.042762763	0.089686013	0.4995032	0.680931025	0.608384896	14.57199399	0.107081042	44.53683553	2.790413149	1.684767041	0.5	0.5	0.84870282	5.144354329	2	0.993283036	292.6883
32	1	0	pop_healthy_1000_anth	60.37462545	0.2268058	40	50.09926116	1.181370523	1.155972115	16.31549096	0.47	0.934802288	0.329583552	0.026293707	9.944284491	1.609877215	0.486905375	12.10859187	0.79	0.8	0.002	0.16	0.18	0.15	0.92	0.853	0.002024	0.0016	0.135	0.009	0.03	0.020890087	0.030417404	0.088026922	0.57532775	0.631770662	0.436388484	15.57160366	0.157607032	42.55589744	2.417226101	0.573789073	0.5	0.5	1.336009745	16.28731111	2	1.269631251	292.6883
33	1	0	pop_healthy_1000_anth	71.23432661	0.216650002	40	27.9246682	1.07419897	1.106488353	18.13281841	0.463082227	0.912920236	0.455177052	0.02729392	12.22314021	1.71003411	0.516185771	12.72464557	0.780436179	0.790315118	0.001975788	0.168301327	0.191621858	0.159684882	0.908862386	0.842673495	0.001999497	0.00158063	0.143716394	0.009581093	0.031936976	0.021754169	0.031915144	0.088115949	0.242985822	0.617435476	0.511243701	15.18489541	0.147516278	44.23543431	3.327423491	0.927700706	0.496462251	0.496462251	0.674597133	32.0995549	1.985846237	0.905627564	292.6883
34	1	0	pop_healthy_1000_anth	66.86286305	0.233263377	40	22.87846837	1.439469504	0.830138322	16.93047745	0.446261561	0.878872875	0.413579818	0.031979907	9.962118055	1.415972117	0.578766851	17.38461166	0.757181608	0.766766186	0.001916915	0.188486127	0.219880577	0.183233814	0.881781114	0.817564446	0.001939918	0.001533532	0.164910433	0.010994029	0.036646763	0.026810113	0.030305897	0.119865225	0.399071156	0.715772256	0.245571829	14.82706665	0.129652827	44.90079112	3.384164413	0.666129253	0.487860162	0.487860162	1.610043369	12.52595699	1.951431154	1.362256885	292.6883
35	1	0	pop_healthy_1000_anth	77.95415372	0.222674826	40	53.15760467	1.134479912	0.978016797	18.71044298	0.47	1.034209669	0.440896892	0.028490554	14.03506497	1.480798033	0.449963355	11.05778979	0.79	0.8	0.002	0.16	0.18	0.15	0.92	0.853	0.002024	0.0016	0.135	0.009	0.03	0.021101737	0.036624318	0.081890966	0.142745249	0.685513163	0.452550682	15.14227362	0.16137753	44.68437784	2.467729685	1.563104367	0.5	0.5	1.400963326	28.94650949	2	1.116486211	292.6883
36	1	0	pop_healthy_1000_anth	66.98265209	0.229934585	40	20.22294024	1.23296255	1.238066484	17.06785795	0.437409801	0.911149085	0.36299722	0.031753853	10.13103297	1.454026065	0.587862915	12.34502546	0.74494405	0.754373721	0.001885934	0.199108239	0.234751535	0.195626279	0.867529779	0.80435098	0.001908566	0.001508747	0.176063651	0.011737577	0.039125256	0.029795909	0.026058171	0.137513632	0.429509017	0.712357175	0.411910343	14.83541076	0.150400442	44.78224938	3.411236996	0.748747177	0.483333372	0.483333372	0.778007768	25.40529545	1.933320452	1.580728167	292.6883
37	1	0	pop_healthy_1000_anth	78.99238569	0.245798821	40	55.01571342	1.255180587	0.895490339	17.9267977	0.47	0.781466482	0.355928017	0.028228264	13.25135786	1.459276788	0.448613462	20.20768435	0.79	0.8	0.002	0.16	0.18	0.15	0.92	0.853	0.002024	0.0016	0.135	0.009	0.03	0.021734409	0.034903144	0.077334538	0.241070129	0.631488922	0.582196354	14.64817089	0.149596442	44.66276327	2.115444426	0.731581105	0.5	0.5	1.743631497	24.07725926	2	1.061117707	292.6883
38	1	0	pop_healthy_1000_anth	65.56803447	0.205181137	40	25.19395016	1.018771161	0.853327751	17.87628899	0.453979834	0.997282609	0.401015715	0.032096167	11.7038155	1.439901194	0.53681209	6.528297903	0.76785212	0.777571767	0.001943929	0.179224199	0.206913879	0.172428233	0.894207533	0.829085897	0.001967257	0.001555144	0.155185409	0.010345694	0.034485647	0.025812066	0.034980157	0.110472093	0.286366764	0.638333815	0.58660005	14.91681242	0.105606537	45.31370892	3.427479614	1.488157598	0.491807287	0.491807287	0.642623752	20.2085057	1.96722274	1.028836659	292.6883
39	1	0	pop_healthy_1000_anth	65.05417691	0.230565901	40	25.26228469	1.166791667	1.100286772	16.79732223	0.454207616	0.885791694	0.362375762	0.029439316	10.1217914	1.524075738	0.477948717	12.10721292	0.768167029	0.777890662	0.001944727	0.178950861	0.206531206	0.172109338	0.894574261	0.829425918	0.001968063	0.001555781	0.154898404	0.01032656	0.034421868	0.025310872	0.034934502	0.110754993	0.392990757	0.699990858	0.500098543	14.68805519	0.124808694	43.31455727	3.451858355	0.31230434	0.491923775	0.491923775	1.10866215	15.57028651	1.967688782	0.733049503	292.6883
40	1	0	pop_healthy_1000_anth	76.26678031	0.212670712	40	39.36015804	1.262008528	1.166264971	18.93711706	0.47	1.055887231	0.514215871	0.027271343	13.54779611	1.435495691	0.497089172	9.011794747	0.79	0.8	0.002	0.16	0.18	0.15	0.92	0.853	0.002024	0.0016	0.135	0.009	0.03	0.021736423	0.039698853	0.081687894	0.439712621	0.625977666	0.436016498	14.88247173	0.141447074	42.52807158	2.775090918	1.183013972	0.5	0.5	1.9251641	12.34863144	2	0.972843795	292.6883
41	1	0	pop_healthy_1000_anth	84.46710345	0.240567598	40	22.50399877	0.893880723	0.872486731	18.73808632	0.445013329	0.997867637	0.407673563	0.029271996	12.41769699	1.420416618	0.534542067	24.05858836	0.755455928	0.765018661	0.001912547	0.189984005	0.221977607	0.184981339	0.87977146	0.815701147	0.001935497	0.001530037	0.166483205	0.01109888	0.036996268	0.026345134	0.03241987	0.131435515	0.21953546	0.707166915	0.193251095	14.81851338	0.101066535	45.46106104	3.253579619	2.622868212	0.487221817	0.487221817	0.76615828	21.77984787	1.948877272	0.939258534	292.6883
42	1	0	pop_healthy_1000_anth	69.61937982	0.217587513	40	28.91392179	1.060727287	0.977730209	17.88743591	0.466379739	1.007794796	0.411265644	0.031148393	12.21743876	1.449524013	0.520808593	10.74702833	0.78499499	0.794931635	0.001987329	0.164344313	0.186082038	0.155068365	0.91417138	0.847595856	0.002011177	0.001589863	0.139561528	0.009304102	0.031013673	0.01995059	0.038360471	0.089946368	0.357398414	0.59226985	0.39206082	14.98662016	0.096358331	44.89603976	2.841515021	1.054629288	0.498148599	0.498148599	1.231945469	13.03294307	1.992592947	0.769562106	292.6883
43	1	0	pop_healthy_1000_anth	64.81703665	0.205615528	40	46.05752086	1.038667881	0.956921473	17.75483463	0.47	0.842792784	0.329873524	0.025705162	11.50536801	1.458143181	0.500405689	13.93785445	0.79	0.8	0.002	0.16	0.18	0.15	0.92	0.853	0.002024	0.0016	0.135	0.009	0.03	0.020222506	0.037293409	0.080498882	0.621232057	0.630798794	0.50465388	14.98694717	0.165944422	43.65285744	2.652343032	0.519007693	0.5	0.5	1.064118699	15.80488718	2	0.489942259	292.6883
44	1	0	pop_healthy_1000_anth	64.89857186	0.203371637	40	24.39859454	1.04617791	1.061944084	17.86373953	0.451328648	0.91329981	0.41295618	0.030107591	11.44656404	1.443156307	0.456446964	8.437010641	0.764186856	0.773860108	0.00193465	0.182405622	0.211367871	0.176139892	0.889939124	0.82512834	0.001957866	0.00154772	0.158525903	0.010568394	0.035227978	0.027623612	0.033087317	0.115913237	0.25460606	0.679416421	0.518269254	14.91687971	0.122548602	44.60922489	3.470902021	1.660023263	0.490451471	0.490451471	0.526923374	7.066292967	1.961798415	0.96743456	292.6883
45	1	0	pop_healthy_1000_anth	70.70401757	0.220089443	40	48.53087045	0.836976084	0.995409877	17.92348433	0.47	0.87774508	0.348909113	0.029258867	11.09482661	1.668251588	0.516583515	7.472483087	0.79	0.8	0.002	0.16	0.18	0.15	0.92	0.853	0.002024	0.0016	0.135	0.009	0.03	0.023208547	0.037004487	0.073882774	0.343349145	0.662446326	0.214187803	14.88219321	0.115222105	44.70622209	2.471198225	0.697974491	0.5	0.5	0.653682041	22.43073157	2	1.203596784	292.6883
46	1	0	pop_healthy_1000_anth	70.70845444	0.229826064	40	42.888652	1.143230694	0.772648667	17.54026023	0.47	0.851747135	0.442971671	0.027747181	11.94338953	1.323704167	0.499863704	12.99903154	0.79	0.8	0.002	0.16	0.18	0.15	0.92	0.853	0.002024	0.0016	0.135	0.009	0.03	0.020313548	0.042360457	0.079609968	0.397267687	0.634399658	0.468495795	14.90997224	0.100255287	44.14564825	2.548791322	1.291747695	0.5	0.5	1.027114529	24.192835	2	1.150957446	292.6883
47	1	0	pop_healthy_1000_anth	75.57990304	0.244759798	40	53.25754836	1.078285983	0.946912941	17.57248261	0.47	1.037978746	0.390925586	0.031718592	11.83468163	1.39524493	0.493846218	17.46669003	0.79	0.8	0.002	0.16	0.18	0.15	0.92	0.853	0.002024	0.0016	0.135	0.009	0.03	0.022476034	0.036224542	0.077233683	0.726655175	0.611857893	0.437119706	15.12032884	0.136000581	46.52432099	2.215914473	1.044068105	0.5	0.5	0.776866855	24.87550874	2	1.082263446	292.6883
48	1	0	pop_healthy_1000_anth	74.2377801	0.238598011	40	48.96557873	1.045053299	0.873348366	17.63920789	0.47	0.834159821	0.437450865	0.028714862	12.55503563	1.524394732	0.48548734	18.23485897	0.79	0.8	0.002	0.16	0.18	0.15	0.92	0.853	0.002024	0.0016	0.135	0.009	0.03	0.023446706	0.036845671	0.083379807	0.545279572	0.657166475	0.340735412	15.23155633	0.123037964	43.63690903	2.377328429	0.686469699	0.5	0.5	0.635757512	17.94020056	2	0.921247988	292.6883
49	1	0	pop_healthy_1000_anth	60.01526337	0.209868287	40	56.08489577	1.074871032	1.044982319	16.91053895	0.47	0.847530872	0.249628563	0.026869882	11.25873511	1.494525959	0.471626088	7.56494771	0.79	0.8	0.002	0.16	0.18	0.15	0.92	0.853	0.002024	0.0016	0.135	0.009	0.03	0.023033786	0.029944034	0.076812686	0.455635627	0.692061156	0.396214258	14.72987784	0.110119856	45.6886599	2.275216565	1.229211719	0.5	0.5	1.316721383	10.46331531	2	1.192095374	292.6883
50	1	0	pop_healthy_1000_anth	70.25890334	0.224276486	40	26.0799557	1.057082549	1.05588616	17.69941092	0.456933186	0.923507929	0.419804486	0.02880673	11.45479538	1.500903191	0.526991314	15.56600656	0.771935129	0.78170646	0.001954266	0.175680177	0.201952248	0.16829354	0.898962429	0.833494513	0.001977717	0.001563413	0.151464186	0.010097612	0.033658708	0.026616964	0.0350155	0.10984464	0.459555869	0.692968844	0.486268412	15.17259838	0.103437427	43.26832752	3.337996047	1.659670761	0.493317631	0.493317631	0.436476712	9.67033276	1.973265298	0.744081929	292.6883
51	1	0	pop_healthy_1000_anth	65.54067876	0.231417133	40	54.80143131	1.013375871	0.772060627	16.82897686	0.47	0.849008957	0.272048283	0.025026686	10.36917579	1.457245211	0.461087438	14.44797675	0.79	0.8	0.002	0.16	0.18	0.15	0.92	0.853	0.002024	0.0016	0.135	0.009	0.03	0.01932916	0.034211409	0.091062961	0.36781143	0.640581203	0.407340653	15.24658952	0.128128975	41.62727112	2.19633024	1.023680602	0.5	0.5	1.702956569	14.84706343	2	0.854735666	292.6883
52	1	0	pop_healthy_1000_anth	73.25125012	0.221417486	40	40.08659252	1.390706585	1.34527136	18.18869593	0.47	0.930651079	0.423594813	0.027735827	12.34911333	1.422510643	0.518236392	9.322536846	0.79	0.8	0.002	0.16	0.18	0.15	0.92	0.853	0.002024	0.0016	0.135	0.009	0.03	0.021292973	0.04039219	0.085446548	0.436314911	0.572858244	0.332072845	15.2573194	0.097186682	45.10829859	3.03248193	1.046622479	0.5	0.5	1.653491398	15.65253937	2	0.919962288	292.6883
53	1	0	pop_healthy_1000_anth	66.93189473	0.231355474	40	31.13097325	0.947970527	1.173082568	17.00891732	0.47	1.089550694	0.399054319	0.029533987	10.90089355	1.578504072	0.497210478	10.99646183	0.79	0.8	0.002	0.16	0.18	0.15	0.92	0.853	0.002024	0.0016	0.135	0.009	0.03	0.022030351	0.042818321	0.078825358	0.183059561	0.660334276	0.524445568	14.97250257	0.131409581	44.23566901	2.922242126	2.55867685	0.5	0.5	1.316073862	19.30386531	2	1.46915091	292.6883
54	1	0	pop_healthy_1000_anth	73.60264418	0.241626965	40	24.06244643	0.987832927	1.032389907	17.45315754	0.450208155	0.927209103	0.40433594	0.03066527	10.95708993	1.444129226	0.519867937	19.28525328	0.762637774	0.772291417	0.001930729	0.183750214	0.2132503	0.177708583	0.888135129	0.823455723	0.001953897	0.001544583	0.159937725	0.010662515	0.035541717	0.026735439	0.034395407	0.114740861	0.401076811	0.615794494	0.224767787	14.9404134	0.100598463	44.52917893	3.366170905	0.781647523	0.48987845	0.48987845	0.538345134	21.55605376	1.959505885	1.21803329	292.6883
55	1	0	pop_healthy_1000_anth	73.92744456	0.212968505	40	48.87268731	1.062673091	1.203624989	18.63138567	0.47	0.86574573	0.510220969	0.030788129	13.41511853	1.450770965	0.465523072	11.7109485	0.79	0.8	0.002	0.16	0.18	0.15	0.92	0.853	0.002024	0.0016	0.135	0.009	0.03	0.021800132	0.037724547	0.077975804	0.365997051	0.602876467	0.392739481	14.65470906	0.096346709	45.45791376	2.353208298	2.668910339	0.5	0.5	2.849271764	14.60521456	2	0.710484283	292.6883
56	1	0	pop_healthy_1000_anth	80.2106885	0.2418129	40	41.0155609	0.762324832	1.031620818	18.21278618	0.47	0.815083121	0.505092654	0.027734306	12.33373286	1.449603087	0.506904501	22.44608361	0.79	0.8	0.002	0.16	0.18	0.15	0.92	0.853	0.002024	0.0016	0.135	0.009	0.03	0.022180282	0.040951052	0.07878242	0.56664008	0.61900961	0.435063872	15.26864556	0.123848913	44.22229861	2.767744157	1.417669751	0.5	0.5	0.716577485	10.73770064	2	1.04859886	292.6883
57	1	0	pop_healthy_1000_anth	63.08528655	0.226175953	40	35.1085851	1.070652837	1.147905736	16.70093655	0.47	0.789637794	0.399858028	0.028164292	10.81027122	1.532730582	0.491476007	9.975879846	0.79	0.8	0.002	0.16	0.18	0.15	0.92	0.853	0.002024	0.0016	0.135	0.009	0.03	0.021687024	0.039270127	0.075045824	0.299684642	0.572432929	0.392413307	15.10214787	0.095621511	44.72813093	2.690524297	1.332018489	0.5	0.5	1.046215364	7.850839007	2	0.982204803	292.6883
58	1	0	pop_healthy_1000_anth	67.68522881	0.235718112	40	46.8453551	1.114983612	1.00287478	16.94534729	0.47	0.913124614	0.452732378	0.026824454	10.48424506	1.591620104	0.48978951	11.83452374	0.79	0.8	0.002	0.16	0.18	0.15	0.92	0.853	0.002024	0.0016	0.135	0.009	0.03	0.022508479	0.034721906	0.073502914	0.310000242	0.634333992	0.499218246	15.02386954	0.148770456	45.0887489	2.637653313	0.608325222	0.5	0.5	0.722908395	8.297837763	2	0.901823499	292.6883
59	1	0	pop_healthy_1000_anth	66.25039347	0.200335549	40	52.40596192	0.928852329	1.282182908	18.18508018	0.47	0.689586465	0.425020335	0.027490162	11.40345435	1.540599238	0.498101553	9.143264127	0.79	0.8	0.002	0.16	0.18	0.15	0.92	0.853	0.002024	0.0016	0.135	0.009	0.03	0.022211798	0.034924367	0.077113732	0.601896235	0.615704796	0.592340146	15.27042197	0.113804349	43.70046407	2.341976572	0.996115515	0.5	0.5	1.170810707	12.55187583	2	1.026758021	292.6883
60	1	0	pop_healthy_1000_anth	65.04889371	0.218078788	40	38.14978131	0.72885079	1.209778969	17.2708314	0.47	1.243386041	0.27721622	0.029378284	11.13229688	1.443621438	0.501595093	8.513938183	0.79	0.8	0.002	0.16	0.18	0.15	0.92	0.853	0.002024	0.0016	0.135	0.009	0.03	0.019983071	0.039470802	0.084884518	0.381874117	0.622031657	0.296831418	14.75509417	0.146497124	45.45958531	2.927267451	1.342738347	0.5	0.5	0.966420206	6.253102341	2	0.960515036	292.6883
61	1	0	pop_healthy_1000_anth	60.62992493	0.203057093	40	24.00485251	1.118036919	0.971070628	17.27962977	0.450016175	0.94303806	0.370762216	0.032300736	10.77461838	1.417286322	0.510061521	8.560746436	0.762372362	0.772022645	0.001930057	0.18398059	0.213572826	0.177977355	0.887826042	0.823169145	0.001953217	0.001544045	0.160179619	0.010678641	0.035595471	0.02526623	0.031702392	0.119376742	0.253565444	0.679339292	0.257244202	15.53503166	0.124509996	45.40561669	3.317642368	0.6885384	0.489780272	0.489780272	0.539252107	8.95396113	1.959113094	1.619352618	292.6883
62	1	0	pop_healthy_1000_anth	67.17995925	0.246522667	40	57.4454323	1.098404167	0.928707507	16.50788516	0.47	0.872719439	0.380797426	0.027682498	10.73811429	1.32827402	0.440502709	14.47653404	0.79	0.8	0.002	0.16	0.18	0.15	0.92	0.853	0.002024	0.0016	0.135	0.009	0.03	0.021464717	0.034092331	0.078894032	0.424792736	0.67073497	0.45897145	15.59766264	0.109325083	45.10345813	2.102856841	0.914441964	0.5	0.5	1.559051851	12.95633437	2	1.39941789	292.6883
63	1	0	pop_healthy_1000_anth	77.37637434	0.237599469	40	27.08098716	0.852168103	0.992505829	18.04602088	0.460269957	0.992056247	0.4230196	0.030696291	11.99661788	1.409388514	0.542214138	14.21306595	0.776548216	0.78637794	0.001965945	0.171676051	0.196346472	0.16362206	0.904334631	0.838475479	0.001989536	0.001572756	0.147259854	0.009817324	0.032724412	0.023028506	0.032344212	0.106544817	0.272434434	0.661513002	0.450040651	15.17211004	0.1606285	43.22443354	3.216594683	0.945247515	0.495024056	0.495024056	1.305559954	9.704038739	1.980092332	1.277870685	292.6883
64	1	0	pop_healthy_1000_anth	73.12396514	0.229061803	40	38.39581744	0.768295806	1.190634299	17.86707783	0.47	1.16718772	0.380731535	0.026808542	12.27375934	1.520954388	0.502583112	13.77895202	0.79	0.8	0.002	0.16	0.18	0.15	0.92	0.853	0.002024	0.0016	0.135	0.009	0.03	0.021077604	0.040839092	0.082704406	0.522094352	0.637883113	0.285677364	14.98373787	0.072282063	45.89835351	2.981925591	1.297947615	0.5	0.5	1.274335143	9.045265172	2	0.844060243	292.6883
65	1	0	pop_healthy_1000_anth	61.42718529	0.237748557	40	27.06494803	1.024164551	0.919980673	16.07390374	0.460216493	0.785911262	0.370822082	0.027030831	9.4410166	1.592855522	0.528946437	11.32019783	0.776474302	0.786303091	0.001965758	0.171740208	0.196436291	0.163696909	0.904248554	0.838395671	0.001989347	0.001572606	0.147327218	0.009821815	0.032739382	0.024100374	0.033800986	0.098180224	0.264854382	0.664418687	0.357472774	14.73053635	0.120882776	45.14558913	3.122432051	0.719468059	0.494996715	0.494996715	1.916496673	8.052504479	1.979982946	1.108379728	292.6883
66	1	0	pop_healthy_1000_anth	59.71954838	0.211380312	40	26.3843867	0.90216903	1.014898215	16.80838511	0.457947956	0.934955985	0.39599321	0.032206569	10.28099799	1.375669692	0.55861918	8.652700129	0.773338049	0.783127138	0.001957818	0.174462453	0.200247434	0.166872862	0.900596209	0.835009311	0.001981312	0.001566254	0.150185576	0.010012372	0.033374572	0.025112113	0.03527803	0.095100737	0.216460286	0.633280133	0.497365801	15.19216655	0.074300621	43.42669158	3.195119496	1.611559173	0.493836585	0.493836585	0.313685394	17.03700975	1.975341517	1.242015867	292.6883
67	1	0	pop_healthy_1000_anth	62.46187535	0.240718051	40	28.3236539	1.07267861	0.963395025	16.10842873	0.46441218	0.906857391	0.376284687	0.026692772	9.711113343	1.402447651	0.485021471	11.17509101	0.782274838	0.792177052	0.001980443	0.166705384	0.189387538	0.157822948	0.911003609	0.844658781	0.002004208	0.001584354	0.142040654	0.009469377	0.03156459	0.02332592	0.036232086	0.089080107	0.407351741	0.660937479	0.411136712	14.98635752	0.157889715	43.99693774	2.843607407	0.96221333	0.497142389	0.497142389	2.072847536	23.82796193	1.98856732	0.777168635	292.6883
68	1	0	pop_healthy_1000_anth	68.40282844	0.234752731	40	53.94386947	1.066196066	0.915855569	17.06992857	0.47	0.983564047	0.557327061	0.030264147	11.02192504	1.445252202	0.488558798	14.30284011	0.79	0.8	0.002	0.16	0.18	0.15	0.92	0.853	0.002024	0.0016	0.135	0.009	0.03	0.020615022	0.032230938	0.090498835	0.505227758	0.643283014	0.703227093	14.49719214	0.084789106	44.84798814	2.100271979	0.667084867	0.5	0.5	0.557880555	16.91620181	2	0.93780306	292.6883
69	1	0	pop_healthy_1000_anth	53.83867177	0.219054561	40	29.88583869	1.424985141	0.775097087	15.67729094	0.469619462	0.850754263	0.363026368	0.027476317	9.36569771	1.576921542	0.519621933	7.771037611	0.789473907	0.799467247	0.001998668	0.160456645	0.180639303	0.150532753	0.919387334	0.852431952	0.002022652	0.001598934	0.135479478	0.009031965	0.030106551	0.021471566	0.033271834	0.087498477	0.333932387	0.644850091	0.439055087	14.8465337	0.105024596	42.73194841	3.05685938	1.19936837	0.499805393	0.499805393	0.728742242	17.44713909	1.99922142	0.799717844	292.6883
70	1	0	pop_healthy_1000_anth	74.42905589	0.206169592	40	53.3134252	1.252436769	0.813384462	19.000234	0.47	0.919099872	0.458989707	0.026067537	14.06925492	1.536942606	0.483732916	11.41977704	0.79	0.8	0.002	0.16	0.18	0.15	0.92	0.853	0.002024	0.0016	0.135	0.009	0.03	0.023345207	0.040404426	0.081900247	0.426891925	0.637447509	0.258097902	14.80850688	0.157606355	45.52449467	2.185861085	0.851752648	0.5	0.5	0.650895077	16.70606731	2	1.996365436	292.6883
71	1	0	pop_healthy_1000_anth	70.69913327	0.249523827	40	43.66169946	1.211874789	0.942763661	16.83259343	0.47	1.013377102	0.475959202	0.030620907	11.28359196	1.536135472	0.467711043	17.46091358	0.79	0.8	0.002	0.16	0.18	0.15	0.92	0.853	0.002024	0.0016	0.135	0.009	0.03	0.023399267	0.037172517	0.07107342	0.461255646	0.659377222	0.664751147	15.55818226	0.133045395	44.33124512	2.408476669	0.479298436	0.5	0.5	2.017820517	35.75443471	2	0.638391204	292.6883
72	1	0	pop_healthy_1000_anth	58.78859256	0.221199933	40	29.64823507	1.360541942	1.095431023	16.30249352	0.46882745	0.930819739	0.392975638	0.02565444	10.24922367	1.582921553	0.545453402	9.935504995	0.78837895	0.79835843	0.001995896	0.16140706	0.181969884	0.15164157	0.918112195	0.851249676	0.002019847	0.001596717	0.136477413	0.009098494	0.030328314	0.021796732	0.036612626	0.077752301	0.292815231	0.650075011	0.368359601	14.56099543	0.116192524	44.3401965	3.082957469	1.144691167	0.499400358	0.499400358	0.536938507	16.74014899	1.997600963	1.256421713	292.6883
73	1	0	pop_healthy_1000_anth	58.62562909	0.212946346	40	53.48921653	1.027340501	1.032247667	16.59237912	0.47	0.799056144	0.248911521	0.026430835	10.0736573	1.518269034	0.493490043	9.896237538	0.79	0.8	0.002	0.16	0.18	0.15	0.92	0.853	0.002024	0.0016	0.135	0.009	0.03	0.022612976	0.034822854	0.075479647	0.552491955	0.673161983	0.508002916	14.75595103	0.108900752	43.10211152	2.213021538	0.549013069	0.5	0.5	0.622117877	13.11115014	2	1.225614085	292.6883
74	1	0	pop_healthy_1000_anth	62.43715546	0.208526497	40	20.99569945	0.773367883	1.034164343	17.30377784	0.439985665	0.875320872	0.394105716	0.033132764	10.2554673	1.505260628	0.543592353	10.52452923	0.748505182	0.757979931	0.00189495	0.196017202	0.230424083	0.192020069	0.87167692	0.808196101	0.001917689	0.00151596	0.172818062	0.011521204	0.038404014	0.028207822	0.028399708	0.13376757	0.285619487	0.740090814	0.543635627	15.00964661	0.116753954	44.78122309	3.736239592	0.8596825	0.484650669	0.484650669	0.415450604	9.585371552	1.93859067	0.656019247	292.6883
75	1	0	pop_healthy_1000_anth	62.74544622	0.239145715	40	41.10851429	1.214851758	0.851880831	16.19794069	0.47	0.827773635	0.38980689	0.027848087	9.581977921	1.467827607	0.562048371	12.58937474	0.79	0.8	0.002	0.16	0.18	0.15	0.92	0.853	0.002024	0.0016	0.135	0.009	0.03	0.020146	0.036277491	0.084663103	0.363234533	0.610209227	0.543013947	15.09194353	0.090275809	43.77483446	2.990931664	1.767671127	0.5	0.5	0.499403632	17.88769109	2	1.574610388	292.6883
76	1	0	pop_healthy_1000_anth	65.1601586	0.210263912	40	56.18786862	0.692119953	0.913886076	17.60389204	0.47	1.074641035	0.475496404	0.024983151	12.24988876	1.483477394	0.482824495	8.642627067	0.79	0.8	0.002	0.16	0.18	0.15	0.92	0.853	0.002024	0.0016	0.135	0.009	0.03	0.022704206	0.032938901	0.072227678	0.516282832	0.688494073	0.583102031	14.55862672	0.149763802	44.26485926	2.170834375	0.903056103	0.5	0.5	0.731474104	20.02078347	2	0.771139453	292.6883
77	1	0	pop_healthy_1000_anth	81.6116735	0.238404608	40	36.43015786	1.059819478	1.197895064	18.50200607	0.47	0.981357771	0.336840208	0.026670041	12.97841808	1.549260859	0.513910569	21.36036214	0.79	0.8	0.002	0.16	0.18	0.15	0.92	0.853	0.002024	0.0016	0.135	0.009	0.03	0.020893729	0.042584002	0.081881259	0.519141113	0.659771826	0.50533171	15.64256922	0.097453235	45.08085227	2.815422312	1.198453953	0.5	0.5	1.067243787	19.35735156	2	1.026659009	292.6883
78	1	0	pop_healthy_1000_anth	67.14379995	0.216774626	40	27.09436991	0.872351586	1.300992646	17.5994354	0.460314566	0.912644638	0.427374165	0.028350962	11.35131884	1.554904906	0.56316814	15.28852062	0.776609888	0.786440393	0.001966101	0.17162252	0.196271529	0.163559607	0.904406452	0.838542069	0.001989694	0.001572881	0.147203646	0.009813576	0.032711921	0.023789838	0.039657494	0.095115839	0.276770664	0.632535189	0.378934813	15.18431141	0.081301832	46.49564854	3.293327791	0.618030196	0.495046869	0.495046869	2.287853162	29.58552879	1.980183603	1.30703163	292.6883
79	1	0	pop_healthy_1000_anth	76.03666302	0.222906436	40	50.45489357	0.899606407	0.814172333	18.46929086	0.47	0.956448753	0.320072553	0.030397793	12.93848174	1.489183475	0.46955972	15.37025643	0.79	0.8	0.002	0.16	0.18	0.15	0.92	0.853	0.002024	0.0016	0.135	0.009	0.03	0.02242636	0.035479925	0.081715276	0.728266822	0.614052557	0.467223777	14.98112	0.12673959	44.09535861	2.444505844	0.621749728	0.5	0.5	0.306310526	15.53350131	2	1.001218141	292.6883
80	1	0	pop_healthy_1000_anth	70.68483426	0.218124981	40	42.78660269	1.068595081	0.837400812	18.00157146	0.47	0.816771516	0.493494766	0.025024228	12.44587982	1.596001607	0.47995452	9.309561108	0.79	0.8	0.002	0.16	0.18	0.15	0.92	0.853	0.002024	0.0016	0.135	0.009	0.03	0.023130542	0.038740454	0.07897378	0.286198898	0.647932944	0.514899632	14.84205456	0.091291712	43.73698275	2.683889725	1.110789591	0.5	0.5	1.750967204	9.138559026	2	0.682411053	292.6883
81	1	0	pop_healthy_1000_anth	70.22667467	0.23507498	40	54.39207114	0.706508292	0.937290026	17.28414289	0.47	0.980033089	0.427777081	0.027044045	12.16080614	1.614055822	0.480305796	15.40960347	0.79	0.8	0.002	0.16	0.18	0.15	0.92	0.853	0.002024	0.0016	0.135	0.009	0.03	0.021511101	0.036671999	0.080540998	0.320123208	0.633573554	0.638271217	15.08390597	0.107221952	44.8643808	2.237289209	0.908124952	0.5	0.5	0.55192428	16.19861158	2	0.689245924	292.6883
82	1	0	pop_healthy_1000_anth	70.6642171	0.219443937	40	55.61937291	1.180910562	1.11622164	17.94477358	0.47	0.984917004	0.433113049	0.026015468	12.37446473	1.553379934	0.480347533	10.39944014	0.79	0.8	0.002	0.16	0.18	0.15	0.92	0.853	0.002024	0.0016	0.135	0.009	0.03	0.021802659	0.030066244	0.079546271	0.54940811	0.613291015	0.558184077	14.96049668	0.183663881	44.03735378	2.199327226	1.967178204	0.5	0.5	1.125063379	9.25677074	2	0.78048527	292.6883
83	1	0	pop_healthy_1000_anth	61.85320182	0.225136551	40	51.13152099	0.804917976	0.904024299	16.5751737	0.47	0.684187794	0.465463676	0.025947606	10.43745083	1.52290297	0.470167307	7.192180666	0.79	0.8	0.002	0.16	0.18	0.15	0.92	0.853	0.002024	0.0016	0.135	0.009	0.03	0.024360174	0.035247804	0.087125418	0.542939507	0.670028638	0.337958099	15.32032727	0.132229839	45.06362495	2.172521945	1.24812787	0.5	0.5	2.010522588	17.21435521	2	1.324564446	292.6883
84	1	0	pop_healthy_1000_anth	69.17284583	0.232400297	40	28.31012438	1.251059638	0.906796033	17.25239856	0.464367081	0.963052299	0.415558882	0.031981252	11.28368126	1.630709848	0.563035482	13.63328476	0.78221249	0.792113914	0.001980285	0.166759502	0.189463303	0.157886086	0.910931001	0.844591461	0.002004048	0.001584228	0.142097478	0.009473165	0.031577217	0.024951911	0.041110889	0.081297283	0.387095643	0.63741184	0.487717382	15.05874262	0.102879885	43.41639567	2.993932658	1.106230991	0.497119325	0.497119325	1.988586449	6.159018692	1.988475048	0.705575124	292.6883
85	1	0	pop_healthy_1000_anth	65.03236231	0.207739467	40	42.47714392	0.936546201	0.760019512	17.69315402	0.47	1.164657099	0.316825048	0.026590037	13.10626739	1.556544026	0.463554193	10.30923398	0.79	0.8	0.002	0.16	0.18	0.15	0.92	0.853	0.002024	0.0016	0.135	0.009	0.03	0.02160213	0.038652447	0.073177666	0.414437575	0.654170306	0.494807266	15.08522496	0.056042192	46.28598738	2.695282524	0.766640699	0.5	0.5	1.235024468	16.16491922	2	1.121185146	292.6883
86	1	0	pop_healthy_1000_anth	66.05428445	0.201213501	40	21.9998112	0.810107387	1.226116036	18.11848736	0.443332704	0.963547302	0.412298587	0.031356791	11.37346165	1.378373205	0.516820988	7.923285624	0.753132463	0.762665786	0.001906664	0.192000755	0.224801057	0.187334214	0.877065653	0.813192394	0.001929544	0.001525332	0.168600793	0.011240053	0.037466843	0.027588335	0.030054706	0.127474837	0.492400287	0.709750513	0.24511021	14.72797669	0.142025542	43.85249788	3.572124049	0.811318334	0.486362345	0.486362345	0.891435156	13.20607996	1.945438712	0.748554727	292.6883
87	1	0	pop_healthy_1000_anth	67.40793012	0.246657483	40	35.17721223	1.209434141	0.898406659	16.53135104	0.47	0.914188503	0.398136138	0.026946848	10.30003109	1.603401194	0.53034661	13.9094462	0.79	0.8	0.002	0.16	0.18	0.15	0.92	0.853	0.002024	0.0016	0.135	0.009	0.03	0.021096691	0.037816601	0.083475533	0.362336513	0.673903363	0.56381724	14.56486363	0.104846752	45.71924199	2.936131596	0.549416385	0.5	0.5	1.108448211	11.01270825	2	0.717583385	292.6883
88	1	0	pop_healthy_1000_anth	73.77601635	0.224974366	40	39.47409376	0.945755163	0.919644902	18.1088588	0.47	1.074317761	0.332774948	0.028161201	12.97401394	1.585117132	0.484898804	9.270801032	0.79	0.8	0.002	0.16	0.18	0.15	0.92	0.853	0.002024	0.0016	0.135	0.009	0.03	0.023148838	0.037529538	0.07876059	0.382103776	0.615579183	0.526532959	14.52168211	0.080753766	43.22477678	2.877876085	1.772600864	0.5	0.5	0.557734937	12.61447726	2	0.617846499	292.6883
89	1	0	pop_healthy_1000_anth	64.01066912	0.236950188	40	54.37992133	1.021021958	1.29666471	16.4360576	0.47	0.813728858	0.502252606	0.028329817	9.948565764	1.522168381	0.520838335	13.1884735	0.79	0.8	0.002	0.16	0.18	0.15	0.92	0.853	0.002024	0.0016	0.135	0.009	0.03	0.020222984	0.033085513	0.076156317	0.184220248	0.665588235	0.626022423	15.18894699	0.137564566	45.14708208	2.297959929	1.519705013	0.5	0.5	0.596883147	10.06486479	2	0.892488996	292.6883
90	1	0	pop_healthy_1000_anth	69.95453896	0.238675486	40	20.72835213	1.201793016	1.032983262	17.12001109	0.439094507	0.835037973	0.369988767	0.032998148	10.010559	1.531360324	0.553834284	14.73858048	0.747273156	0.75673231	0.001891831	0.197086591	0.231921228	0.19326769	0.870242156	0.806865825	0.001914533	0.001513465	0.173940921	0.011596061	0.038653538	0.030457909	0.026336823	0.13470619	0.490843857	0.747664944	0.475876577	15.15918428	0.15446563	43.90287315	3.659114722	0.487584547	0.484194931	0.484194931	0.802889512	19.95133231	1.936767361	0.819074764	292.6883
91	1	0	pop_healthy_1000_anth	61.83706585	0.205025822	40	36.88588261	1.015842813	1.103099132	17.36681414	0.47	1.082321692	0.431958841	0.027677079	11.3783214	1.530124587	0.491989666	7.249872005	0.79	0.8	0.002	0.16	0.18	0.15	0.92	0.853	0.002024	0.0016	0.135	0.009	0.03	0.022645087	0.041254007	0.07704186	0.452591186	0.59957901	0.488200707	15.36512692	0.123774882	43.38230871	2.738523306	0.842248974	0.5	0.5	0.896112252	14.59755124	2	0.77340789	292.6883
92	1	0	pop_healthy_1000_anth	62.28361912	0.233637765	40	53.76874251	1.200620406	0.94677399	16.32733858	0.47	0.516261394	0.423373313	0.026991089	10.07743157	1.473912781	0.499874864	15.54618369	0.79	0.8	0.002	0.16	0.18	0.15	0.92	0.853	0.002024	0.0016	0.135	0.009	0.03	0.022431091	0.033066953	0.08871144	0.341468953	0.653496607	0.470709629	14.83681091	0.114426622	44.20300865	2.161512183	2.355627614	0.5	0.5	2.635578316	11.20081479	2	0.849467509	292.6883
93	1	0	pop_healthy_1000_anth	83.51716869	0.227852236	40	46.74809781	0.910799698	1.024347545	19.14525848	0.47	0.964988618	0.518965697	0.026501392	13.34194088	1.457721744	0.421731516	19.86099602	0.79	0.8	0.002	0.16	0.18	0.15	0.92	0.853	0.002024	0.0016	0.135	0.009	0.03	0.021431085	0.042323939	0.07489724	0.26187962	0.652127509	0.261922578	14.73545938	0.094088222	45.49667161	2.613931118	0.847668632	0.5	0.5	3.966330262	11.66823306	2	0.957458031	292.6883
94	1	0	pop_healthy_1000_anth	57.21437937	0.225149135	40	59.62796371	0.963004448	1.052864757	15.94106947	0.47	0.908719397	0.336996044	0.030363994	9.073787468	1.642388145	0.479782041	10.33970533	0.79	0.8	0.002	0.16	0.18	0.15	0.92	0.853	0.002024	0.0016	0.135	0.009	0.03	0.022178597	0.032846057	0.07888263	0.452648806	0.664969509	0.516107203	14.98755335	0.150097103	45.10881718	2.138615719	1.163868943	0.5	0.5	0.77476116	8.697521682	2	1.047023798	292.6883
95	1	0	pop_healthy_1000_anth	53.96992059	0.205067485	40	21.75489081	0.995241676	0.696767222	16.22286251	0.442516303	0.882032293	0.372544583	0.032633175	9.250875865	1.530991731	0.498778432	12.15384607	0.752003788	0.761522824	0.001903807	0.192980437	0.226172611	0.188477176	0.875751247	0.811973711	0.001926653	0.001523046	0.169629459	0.011308631	0.037695435	0.026165942	0.029277376	0.134157077	0.392741486	0.701301453	0.45126627	15.0133656	0.161013458	43.19020186	3.419269162	1.570066481	0.485944837	0.485944837	0.770069603	15.9513794	1.943768355	0.844897753	292.6883
96	1	0	pop_healthy_1000_anth	50.99307438	0.208584724	40	20.92381496	1.279667078	0.875495167	15.63559271	0.43974605	0.839072528	0.34545062	0.030603044	8.558688244	1.561632037	0.551909737	7.646322831	0.748173914	0.75764447	0.001894111	0.19630474	0.230826636	0.19235553	0.87129114	0.807838416	0.001916841	0.001515289	0.173119977	0.011541332	0.038471106	0.030143569	0.026795341	0.135633696	0.21046321	0.794504837	0.393379248	15.32318488	0.140181621	43.57582552	3.707123934	1.049169389	0.48452813	0.48452813	2.062425934	14.5212215	1.938100418	1.051009279	292.6883
97	1	0	pop_healthy_1000_anth	68.42404697	0.230318228	40	34.16860678	0.809528874	0.99849412	17.23614835	0.47	1.038410554	0.414987701	0.0260897	10.95956131	1.668156517	0.506851474	12.30288173	0.79	0.8	0.002	0.16	0.18	0.15	0.92	0.853	0.002024	0.0016	0.135	0.009	0.03	0.021483709	0.039139847	0.07887907	0.459036359	0.647087145	0.465865868	15.18969402	0.128838617	44.54449251	2.599589183	1.311697951	0.5	0.5	1.219626866	24.49356139	2	0.808528206	292.6883
98	1	0	pop_healthy_1000_anth	82.93768868	0.238988566	40	35.05913456	1.216294758	0.788090599	18.62890819	0.47	1.074788866	0.447443767	0.027989498	13.44627647	1.58801781	0.518515334	22.08969784	0.79	0.8	0.002	0.16	0.18	0.15	0.92	0.853	0.002024	0.0016	0.135	0.009	0.03	0.021486778	0.044178446	0.084401294	0.53290071	0.607865747	0.545530741	15.08419434	0.092741567	46.31118174	2.81550335	0.242184824	0.5	0.5	0.44616249	12.52278347	2	1.121804212	292.6883
99	1	0	pop_healthy_1000_anth	60.73461208	0.193327484	40	27.6057957	0.856059069	0.979929661	17.72439141	0.462019319	0.91276843	0.467389327	0.030399183	11.55951396	1.544460259	0.534992928	6.929319923	0.778966708	0.788827047	0.001972068	0.169576817	0.193407544	0.161172953	0.907151104	0.841086838	0.001995732	0.001577654	0.145055658	0.009670377	0.032234591	0.02358636	0.037596222	0.096311643	0.373618005	0.679718111	0.277769092	15.30265957	0.11912522	42.69826574	3.234411508	2.188588798	0.49591868	0.49591868	0.827137601	26.75816652	1.983671527	0.661075552	292.6883
100	1	0	pop_healthy_1000_anth	65.73384612	0.234826085	40	34.05980632	0.886892013	0.90355734	16.73097895	0.47	0.817958195	0.342985954	0.02855288	10.93370989	1.512806277	0.501599189	11.99753672	0.79	0.8	0.002	0.16	0.18	0.15	0.92	0.853	0.002024	0.0016	0.135	0.009	0.03	0.023725224	0.041017025	0.075761834	0.186312108	0.630244227	0.347574277	14.5851476	0.127215063	46.95950208	2.854619818	1.641644181	0.5	0.5	0.92826351	12.60521038	2	0.838156431	292.6883
101	1	0	pop_healthy_1000_anth	58.45278731	0.202615843	40	21.46315619	0.882036545	1.050551137	16.98501412	0.441543854	0.904948835	0.373599487	0.033645902	9.862760843	1.564780652	0.507226331	9.239779446	0.750659378	0.760161396	0.001900403	0.194147375	0.227806325	0.189838604	0.874185605	0.810522088	0.001923208	0.001520323	0.170854744	0.011390316	0.037967721	0.029375732	0.025388797	0.129586838	0.345761201	0.790545194	0.298917839	14.92976679	0.165854821	44.40357927	3.182495631	1.131647526	0.485447527	0.485447527	0.847573529	18.01203909	1.941778725	0.957220029	292.6883
102	1	0	pop_healthy_1000_anth	75.16556657	0.244209315	40	36.69356038	1.166450445	1.253634574	17.54398935	0.47	0.922317775	0.381301864	0.02789104	11.57642207	1.595052302	0.528599351	15.20301883	0.79	0.8	0.002	0.16	0.18	0.15	0.92	0.853	0.002024	0.0016	0.135	0.009	0.03	0.021486804	0.039412487	0.083213962	0.481233819	0.6021201	0.530919352	15.31077408	0.105676983	43.73776834	2.762954622	0.795401465	0.5	0.5	1.266565541	29.03047093	2	0.78443963	292.6883
103	1	0	pop_healthy_1000_anth	78.34843816	0.24909189	40	46.74060627	1.217958216	0.973637258	17.73517088	0.47	0.820154595	0.442431427	0.025582679	11.61149094	1.524948301	0.522870023	20.25933652	0.79	0.8	0.002	0.16	0.18	0.15	0.92	0.853	0.002024	0.0016	0.135	0.009	0.03	0.020867685	0.036467289	0.075870742	0.487094278	0.636634142	0.548973374	14.59634062	0.141076146	43.54252992	2.601920053	0.435913214	0.5	0.5	0.434897133	14.32569739	2	1.060625087	292.6883
104	1	0	pop_healthy_1000_anth	56.78407788	0.2354056	40	35.37729001	0.784850859	0.835831252	15.53119576	0.47	0.788835844	0.390524341	0.027404301	9.168627482	1.595645783	0.539670513	9.568284333	0.79	0.8	0.002	0.16	0.18	0.15	0.92	0.853	0.002024	0.0016	0.135	0.009	0.03	0.022980376	0.036662783	0.081913931	0.462896056	0.650843091	0.61420507	15.04443332	0.164293019	43.50739261	2.42355556	1.18368896	0.5	0.5	1.177481766	17.80029451	2	0.84273321	292.6883
105	1	0	pop_healthy_1000_anth	65.09086975	0.235427354	40	54.27095735	0.85674717	1.089909495	16.62767689	0.47	0.766368458	0.521754128	0.029738824	10.01969445	1.503464235	0.505473849	11.78470748	0.79	0.8	0.002	0.16	0.18	0.15	0.92	0.853	0.002024	0.0016	0.135	0.009	0.03	0.02179381	0.034349554	0.082051959	0.378960684	0.614700798	0.356181388	14.47046907	0.102039589	43.92597436	2.153011553	1.00371117	0.5	0.5	1.423817744	22.96013841	2	1.47941969	292.6883
106	1	0	pop_healthy_1000_anth	64.82246946	0.207013828	40	52.334943	0.909174099	0.787421056	17.69551096	0.47	0.81386926	0.421116131	0.026965883	11.90409902	1.483094308	0.477172851	8.845379268	0.79	0.8	0.002	0.16	0.18	0.15	0.92	0.853	0.002024	0.0016	0.135	0.009	0.03	0.020686682	0.036954748	0.078499785	0.260785729	0.626910249	0.473617677	15.40490921	0.127347744	43.69435708	2.285345313	0.467424369	0.5	0.5	1.39905599	15.64222628	2	0.863313128	292.6883
107	1	0	pop_healthy_1000_anth	71.08754538	0.233959167	40	21.69200189	1.015562048	1.093323252	17.43117753	0.442306673	0.914036263	0.405670521	0.031536814	10.59634134	1.583286782	0.538315361	20.35541702	0.751713975	0.761229342	0.001903073	0.193231992	0.226524789	0.188770658	0.875413744	0.811660786	0.00192591	0.001522459	0.169893592	0.011326239	0.037754132	0.026011222	0.02891475	0.128445966	0.326614289	0.769394287	0.607618324	14.72943137	0.121991909	44.90487092	3.417964159	1.194718581	0.485837633	0.485837633	1.730648305	17.6973699	1.943339453	0.887594019	292.6883
108	1	0	pop_healthy_1000_anth	66.94866282	0.224302166	40	30.43199771	0.996509316	1.209335665	17.27643856	0.47	1.022179907	0.442892233	0.02839585	11.5234019	1.587449503	0.493470876	14.19296879	0.79	0.8	0.002	0.16	0.18	0.15	0.92	0.853	0.002024	0.0016	0.135	0.009	0.03	0.020679379	0.038794601	0.082039641	0.30943127	0.624479209	0.628060067	14.79176536	0.149532961	45.15535664	3.1062132	1.80098514	0.5	0.5	1.118396484	18.30099572	2	0.887015333	292.6883
109	1	0	pop_healthy_1000_anth	70.86426131	0.241012384	40	48.68727099	0.927162354	0.943949498	17.14722919	0.47	0.89050546	0.301475396	0.030000876	11.92079572	1.538137807	0.51650168	17.87532978	0.79	0.8	0.002	0.16	0.18	0.15	0.92	0.853	0.002024	0.0016	0.135	0.009	0.03	0.02196042	0.032140778	0.081709128	0.359521315	0.616077176	0.411982328	14.9322448	0.127825706	43.89178926	2.447424449	1.873964744	0.5	0.5	0.846493497	20.00116747	2	0.724224447	292.6883
110	1	0	pop_healthy_1000_anth	63.56028248	0.228339678	40	54.31969553	1.221098402	1.028224238	16.68407821	0.47	0.781320032	0.393735548	0.026685029	11.0270399	1.51189877	0.440149569	8.235367789	0.79	0.8	0.002	0.16	0.18	0.15	0.92	0.853	0.002024	0.0016	0.135	0.009	0.03	0.022853381	0.033306374	0.078876256	0.480623387	0.636876072	0.5034759	15.11245856	0.141723722	43.57382117	2.151738596	1.039499229	0.5	0.5	3.267179499	8.23857118	2	0.580707516	292.6883
111	1	0	pop_healthy_1000_anth	72.5916238	0.220560286	40	48.17574076	0.814171688	0.914454123	18.14176753	0.47	0.972548973	0.323982967	0.026236117	13.89122622	1.670110662	0.520564219	16.80375455	0.79	0.8	0.002	0.16	0.18	0.15	0.92	0.853	0.002024	0.0016	0.135	0.009	0.03	0.019007168	0.039501667	0.075379294	0.388265877	0.610542582	0.401270024	15.25027409	0.098401283	46.01305643	2.602729427	0.856290919	0.5	0.5	1.827713848	9.108952952	2	0.959150077	292.6883
112	1	0	pop_healthy_1000_anth	78.92827778	0.230251813	40	41.59096493	0.534628858	0.833519157	18.51461918	0.47	0.813234947	0.516643131	0.029209761	13.57780031	1.333229825	0.46907133	13.61494869	0.79	0.8	0.002	0.16	0.18	0.15	0.92	0.853	0.002024	0.0016	0.135	0.009	0.03	0.022329091	0.041808157	0.085618654	0.331261261	0.627638716	0.504853511	14.88489004	0.074443792	43.28313652	2.693766633	1.290645076	0.5	0.5	0.997979424	15.361557	2	1.285576713	292.6883
113	1	0	pop_healthy_1000_anth	52.65168746	0.214679679	40	32.29947301	0.997846409	0.88743697	15.66068228	0.47	0.878545784	0.353062694	0.02737875	9.546821937	1.564239952	0.459166031	6.30672662	0.79	0.8	0.002	0.16	0.18	0.15	0.92	0.853	0.002024	0.0016	0.135	0.009	0.03	0.020478979	0.03768912	0.081968597	0.328328526	0.594343153	0.448978099	14.89369616	0.202408749	42.14992775	2.823965103	0.763675281	0.5	0.5	2.354814314	7.637408379	2	0.91490197	292.6883
114	1	0	pop_healthy_1000_anth	67.66311066	0.226003448	40	51.17219731	1.475236561	0.954328072	17.30288206	0.47	0.720112507	0.47600632	0.028073331	12.00415162	1.512776884	0.485289773	12.5763785	0.79	0.8	0.002	0.16	0.18	0.15	0.92	0.853	0.002024	0.0016	0.135	0.009	0.03	0.022606741	0.03696962	0.085298388	0.52801235	0.622723026	0.591861141	15.16029272	0.127982408	45.3886783	2.33669473	1.135448297	0.5	0.5	0.731156419	22.80060623	2	0.591155093	292.6883
115	1	0	pop_healthy_1000_anth	57.46922766	0.22129793	40	48.90115113	0.902660661	1.0130986	16.11495158	0.47	1.085933879	0.366564399	0.027130796	9.636871707	1.557987881	0.487710688	11.68860938	0.79	0.8	0.002	0.16	0.18	0.15	0.92	0.853	0.002024	0.0016	0.135	0.009	0.03	0.020993989	0.033213411	0.077399743	0.500174685	0.605939387	0.432060621	15.21240968	0.094787812	43.54181066	2.506692139	0.740058041	0.5	0.5	3.795469895	16.56666445	2	0.667315673	292.6883
116	1	0	pop_healthy_1000_anth	69.87253985	0.249932595	40	43.12824332	1.304723751	0.990236823	16.72021339	0.47	0.673186936	0.449036063	0.025602425	10.63800063	1.516642334	0.490059765	15.25547627	0.79	0.8	0.002	0.16	0.18	0.15	0.92	0.853	0.002024	0.0016	0.135	0.009	0.03	0.020294717	0.038121707	0.081553808	0.243088778	0.594909715	0.634260034	14.85605826	0.092634514	45.3432937	2.640815766	1.281826704	0.5	0.5	1.481395626	16.9126667	2	0.683911359	292.6883
117	1	0	pop_healthy_1000_anth	68.89662033	0.241717976	40	23.62780862	1.606945767	1.166813395	16.88280034	0.448759362	0.850463804	0.391317793	0.033933814	10.27192401	1.409897535	0.514686068	13.26480453	0.760634818	0.770263107	0.001925658	0.185488766	0.215684272	0.179736893	0.885802573	0.821293038	0.001948766	0.001540526	0.161763204	0.010784214	0.035947379	0.025067592	0.030665157	0.121980818	0.310907979	0.72447179	0.482391741	14.99096786	0.09482152	44.68952764	3.413167813	0.918744758	0.489137538	0.489137538	1.748039043	21.50906973	1.956541655	0.662265603	292.6883
118	1	0	pop_healthy_1000_anth	79.6904552	0.241376301	40	45.43606282	1.087151999	0.932190379	18.17003819	0.47	0.707445636	0.509973361	0.026390298	13.97716983	1.47322944	0.504088536	20.42601005	0.79	0.8	0.002	0.16	0.18	0.15	0.92	0.853	0.002024	0.0016	0.135	0.009	0.03	0.020897588	0.03969619	0.083790745	0.578378749	0.632816503	0.440850302	14.72086086	0.096238753	45.04249457	2.450219227	1.318545191	0.5	0.5	1.197793856	10.32324598	2	1.165386333	292.6883
119	1	0	pop_healthy_1000_anth	60.90756089	0.226375812	40	23.15492381	0.809119441	1.021842661	16.40289834	0.447183079	0.844257001	0.403453703	0.029202996	9.537613238	1.338026828	0.546320428	7.45287071	0.758455607	0.768056311	0.001920141	0.187380305	0.218332427	0.181943689	0.883264758	0.818940042	0.001943182	0.001536113	0.16374932	0.010916621	0.036388738	0.027463512	0.03162183	0.130373668	0.326438344	0.755942967	0.555811155	15.04583633	0.109156655	43.43031583	3.62234035	1.895994182	0.488331427	0.488331427	1.167572196	16.58458485	1.95331658	1.222608858	292.6883
120	1	0	pop_healthy_1000_anth	76.83813969	0.230652619	40	43.11868285	1.279018476	0.834915221	18.25194811	0.47	0.801564554	0.384337181	0.026479989	12.80180528	1.396074482	0.483465557	12.21172265	0.79	0.8	0.002	0.16	0.18	0.15	0.92	0.853	0.002024	0.0016	0.135	0.009	0.03	0.021312759	0.038945313	0.080955686	0.614547718	0.64290705	0.50876491	15.03154446	0.077175682	44.13949374	2.638431876	1.447049351	0.5	0.5	1.011002598	30.1543995	2	0.994268076	292.6883
121	1	0	pop_healthy_1000_anth	71.11270672	0.244864226	40	41.23005853	0.945516326	0.925930346	17.04162225	0.47	1.069706775	0.320894365	0.026336084	10.81478472	1.576997261	0.501927766	16.11971122	0.79	0.8	0.002	0.16	0.18	0.15	0.92	0.853	0.002024	0.0016	0.135	0.009	0.03	0.02080646	0.040384842	0.074850024	0.415812375	0.647581514	0.449189104	15.32448485	0.103702623	44.42826675	2.929599287	5.050909382	0.5	0.5	0.546416299	26.67617301	2	1.029635795	292.6883
122	1	0	pop_healthy_1000_anth	72.23633256	0.216152036	40	26.09521659	1.012224639	0.977008574	18.28092553	0.456984055	1.010180226	0.42582848	0.027384232	12.10594537	1.52150021	0.511845243	12.52015475	0.772005456	0.781777677	0.001954444	0.175619134	0.201866787	0.168222323	0.899044329	0.833570449	0.001977898	0.001563555	0.15140009	0.010093339	0.033644465	0.024549902	0.038906027	0.1000079	0.467582358	0.706914254	0.554887304	14.8410239	0.107054273	44.03139799	3.150962782	0.379319439	0.493343646	0.493343646	0.716348382	19.87326074	1.973369377	0.88841095	292.6883
123	1	0	pop_healthy_1000_anth	67.28700064	0.238519513	40	31.16270917	1.234841631	1.059284643	16.79591346	0.47	0.961514748	0.376530799	0.028548709	10.56443395	1.479934595	0.474101611	13.78567956	0.79	0.8	0.002	0.16	0.18	0.15	0.92	0.853	0.002024	0.0016	0.135	0.009	0.03	0.022202424	0.040155415	0.074362652	0.350934263	0.578710721	0.513311868	15.16125007	0.095059744	45.03781986	2.964069055	1.124019551	0.5	0.5	1.797028343	26.74423419	2	0.947764862	292.6883
124	1	0	pop_healthy_1000_anth	66.36394755	0.225882508	40	30.96795137	1.012999704	1.105939147	17.14055205	0.47	0.981947831	0.416523356	0.0271611	11.4051599	1.539511958	0.513031416	15.16669592	0.79	0.8	0.002	0.16	0.18	0.15	0.92	0.853	0.002024	0.0016	0.135	0.009	0.03	0.023142619	0.041765529	0.084509852	0.43073894	0.653003247	0.357393436	15.09665845	0.077038568	44.60182851	2.971016173	1.090815501	0.5	0.5	1.946149914	30.93757366	2	1.280525892	292.6883
125	1	0	pop_healthy_1000_anth	68.11869417	0.216818914	40	43.92439808	1.094523356	1.164707446	17.72493186	0.47	1.112382442	0.434150713	0.027337837	12.35169268	1.505398239	0.513061798	11.29670848	0.79	0.8	0.002	0.16	0.18	0.15	0.92	0.853	0.002024	0.0016	0.135	0.009	0.03	0.022842698	0.039685876	0.082702007	0.564263736	0.666072172	0.51093379	14.87397661	0.123286814	46.04980705	2.607734876	0.8236467	0.5	0.5	0.557046196	16.9501087	2	1.164515581	292.6883
126	1	0	pop_healthy_1000_anth	65.93304398	0.210949668	40	59.5048097	1.006580302	0.911607197	17.67918092	0.47	0.992274491	0.366007696	0.026980223	10.99366943	1.483854062	0.475093619	13.49249461	0.79	0.8	0.002	0.16	0.18	0.15	0.92	0.853	0.002024	0.0016	0.135	0.009	0.03	0.020007785	0.032913164	0.079363409	0.418409899	0.652390947	0.613959455	14.96053801	0.108870282	46.6753626	1.98079842	0.180221772	0.5	0.5	0.34158334	34.70354363	2	0.766714586	292.6883
127	1	0	pop_healthy_1000_anth	73.28550184	0.223288532	40	57.30989866	0.836309254	1.21522905	18.11656364	0.47	1.159843893	0.415657159	0.02779882	12.41123868	1.541405486	0.495262148	15.42107917	0.79	0.8	0.002	0.16	0.18	0.15	0.92	0.853	0.002024	0.0016	0.135	0.009	0.03	0.021959274	0.032184462	0.081581582	0.453791987	0.650204573	0.802021278	15.03145571	0.130159483	43.06774236	2.06442729	0.872000976	0.5	0.5	0.836029907	8.545958384	2	0.874800767	292.6883
128	1	0	pop_healthy_1000_anth	81.79271294	0.240537839	40	24.35351387	0.771528632	0.96990326	18.44019904	0.45117838	0.879661665	0.389517802	0.030526843	12.21676853	1.636832223	0.541380243	21.66818637	0.76397911	0.773649731	0.001934124	0.182585945	0.211620322	0.176350269	0.889697191	0.824904026	0.001957334	0.001547299	0.158715242	0.010581016	0.035270054	0.026890174	0.036571334	0.110870751	0.417821395	0.691290815	0.651905123	15.2189508	0.136688678	43.30907014	3.335398517	1.241811267	0.490374623	0.490374623	1.850014114	18.22577977	1.961490965	0.891882691	292.6883
129	1	0	pop_healthy_1000_anth	70.82383321	0.226213624	40	24.62142883	0.994633936	1.061777243	17.69417572	0.452071429	0.961421173	0.404039391	0.02875777	11.36581758	1.421608268	0.529327072	13.52053238	0.765213751	0.774900001	0.00193725	0.181514285	0.210119999	0.175099999	0.891135001	0.826237126	0.001960497	0.0015498	0.157589999	0.010506	0.03502	0.025600824	0.033107199	0.104979108	0.303466697	0.716282269	0.326926573	14.91466992	0.153764942	43.26257535	3.311284337	0.541195787	0.490831329	0.490831329	0.845017643	18.7438267	1.963318145	0.953284138	292.6883
130	1	0	pop_healthy_1000_anth	61.76893173	0.233496404	40	52.026086	1.345660709	1.179805269	16.26465841	0.47	0.972450222	0.61005593	0.029022533	9.168697197	1.506251766	0.470327663	10.19346754	0.79	0.8	0.002	0.16	0.18	0.15	0.92	0.853	0.002024	0.0016	0.135	0.009	0.03	0.021203649	0.032691827	0.082246226	0.182248822	0.654001488	0.334336441	15.25459734	0.181984361	43.21533309	2.412982505	0.781253572	0.5	0.5	0.562527173	17.80853026	2	1.142228909	292.6883
131	1	0	pop_healthy_1000_anth	58.05399354	0.247582593	40	53.73571444	0.793322258	0.885012248	15.31284889	0.47	0.747265485	0.390498112	0.030107759	8.692998078	1.404766234	0.491809295	10.72042565	0.79	0.8	0.002	0.16	0.18	0.15	0.92	0.853	0.002024	0.0016	0.135	0.009	0.03	0.021614632	0.030662861	0.079636689	0.498748355	0.6531673	0.50116505	15.10483626	0.146841072	42.97341751	2.274380862	1.035689327	0.5	0.5	1.280537772	22.56905755	2	1.124244907	292.6883
132	1	0	pop_healthy_1000_anth	75.0343315	0.219378912	40	29.59169748	0.910106384	1.448934136	18.49407309	0.468638992	1.035633307	0.470472124	0.02952351	12.82241985	1.467795265	0.561157647	8.803855702	0.788118406	0.798094588	0.001995236	0.16163321	0.182286494	0.151905412	0.917808776	0.850968355	0.002019179	0.001596189	0.136714871	0.009114325	0.030381082	0.021643512	0.043565781	0.091466679	0.505210089	0.643536099	0.551836392	14.50618671	0.129344788	46.193492	3.008915227	1.380719962	0.49930398	0.49930398	1.291150214	20.53709624	1.997215377	1.021795011	292.6883
133	1	0	pop_healthy_1000_anth	62.42858826	0.208922116	40	21.81759663	1.548176431	0.975999295	17.28620063	0.442725322	0.863821479	0.36191952	0.033353155	10.40059177	1.434512138	0.546641294	10.57033098	0.752292758	0.761815451	0.001904539	0.192729613	0.225821459	0.188184549	0.876087769	0.812285725	0.001927393	0.001523631	0.169366094	0.011291073	0.03763691	0.027352759	0.026583331	0.140008914	0.390000174	0.737235469	0.419325986	15.04228179	0.121457977	47.01442236	3.833488154	1.159164423	0.48605173	0.48605173	1.41821372	21.15417948	1.944196009	0.935794348	292.6883
134	1	0	pop_healthy_1000_anth	75.29423853	0.249118574	40	30.72346163	1.096601433	0.998522434	17.385125	0.47	0.959970537	0.413238864	0.028408536	11.67430517	1.423638324	0.51069226	13.2074224	0.79	0.8	0.002	0.16	0.18	0.15	0.92	0.853	0.002024	0.0016	0.135	0.009	0.03	0.022173244	0.044164487	0.078685951	0.418796108	0.598756861	0.533533259	14.97375774	0.168076216	44.75037559	2.857507789	1.355069716	0.5	0.5	1.160697602	7.304556917	2	0.994706232	292.6883
135	1	0	pop_healthy_1000_anth	70.81408778	0.209110487	40	26.06132802	1.005999677	1.101804224	18.40229236	0.456871093	0.997544909	0.419411361	0.027371987	12.49039516	1.545782133	0.50954059	11.00593612	0.771849287	0.781619531	0.001954049	0.175754688	0.202056563	0.168380469	0.89886246	0.833401825	0.001977497	0.001563239	0.151542422	0.010102828	0.033676094	0.026637969	0.037281955	0.096370767	0.399696969	0.692221169	0.574053855	14.84545166	0.087303084	43.75084893	2.977525774	0.692925904	0.493285877	0.493285877	1.326831885	10.31432843	1.973138257	0.932284454	292.6883
136	1	0	pop_healthy_1000_anth	80.85427291	0.247983629	40	32.739862	1.231049987	1.266310014	18.05676651	0.47	1.088938349	0.480654878	0.029433084	12.61835035	1.556649928	0.460997889	24.90477133	0.79	0.8	0.002	0.16	0.18	0.15	0.92	0.853	0.002024	0.0016	0.135	0.009	0.03	0.020362719	0.042184796	0.074523353	0.257498017	0.66871501	0.57999464	14.9412702	0.125661339	45.04527358	2.879936743	1.253313074	0.5	0.5	0.660401785	9.443442716	2	1.255475704	292.6883
137	1	0	pop_healthy_1000_anth	86.0589924	0.24646018	40	34.08109174	1.204278041	0.896574364	18.68636158	0.47	0.899734331	0.447139262	0.025561126	13.1429263	1.358275811	0.506713644	27.44164092	0.79	0.8	0.002	0.16	0.18	0.15	0.92	0.853	0.002024	0.0016	0.135	0.009	0.03	0.022318301	0.042618787	0.083337495	0.43555973	0.56925059	0.427741001	15.45315314	0.084504257	43.50269387	2.977275411	1.357664206	0.5	0.5	0.497349889	18.35674736	2	0.902993816	292.6883
138	1	0	pop_healthy_1000_anth	70.36013752	0.204286954	40	26.54128034	0.970015365	1.012255647	18.55850649	0.458470934	1.057927294	0.454788974	0.031713002	12.47802109	1.4988903	0.567517668	13.31675909	0.774061067	0.783859308	0.001959648	0.173834879	0.19936883	0.166140692	0.901438204	0.835789987	0.001983164	0.001567719	0.149526623	0.009968442	0.033228138	0.025061108	0.036681366	0.103114782	0.371098348	0.653494702	0.673961146	14.84158851	0.106395654	43.69688395	3.245983761	1.011133724	0.494104036	0.494104036	0.474111889	17.81652904	1.976411532	1.22485903	292.6883
139	1	0	pop_healthy_1000_anth	66.49064792	0.211152414	40	24.01057763	0.778743275	0.972576432	17.7452555	0.450035259	0.882290973	0.403668761	0.031643368	11.55851192	1.518672697	0.534644954	10.96453666	0.762398745	0.772049362	0.001930123	0.183957689	0.213540765	0.177950638	0.887856767	0.823197633	0.001953285	0.001544099	0.160155574	0.010677038	0.035590128	0.022904955	0.032806889	0.11186036	0.364060011	0.746150287	0.439900716	14.33352943	0.130895342	45.22949114	3.143328141	2.11071997	0.489790031	0.489790031	1.491771516	23.4123996	1.959152139	1.149076517	292.6883
140	1	0	pop_healthy_1000_anth	81.29441299	0.243663912	40	45.32252069	0.800909007	0.84727688	18.26563367	0.47	1.267275305	0.509480218	0.027540989	13.17041574	1.448297239	0.479085985	14.21938707	0.79	0.8	0.002	0.16	0.18	0.15	0.92	0.853	0.002024	0.0016	0.135	0.009	0.03	0.022969773	0.037369115	0.076423129	0.548614301	0.627341682	0.501553506	14.98102228	0.134382679	43.6978418	2.564437596	1.537301967	0.5	0.5	0.997640088	15.03632164	2	0.643866972	292.6883
141	1	0	pop_healthy_1000_anth	67.50347001	0.215626414	40	51.89831208	0.823866027	0.937922659	17.69343148	0.47	0.937259664	0.312994004	0.027676733	11.01277049	1.433588118	0.47908145	10.36289434	0.79	0.8	0.002	0.16	0.18	0.15	0.92	0.853	0.002024	0.0016	0.135	0.009	0.03	0.020059767	0.033851007	0.082535185	0.507511585	0.636671587	0.377327199	15.22234412	0.102856731	43.33661161	2.21700761	1.056899659	0.5	0.5	0.498486843	15.66825976	2	1.458386663	292.6883
142	1	0	pop_healthy_1000_anth	63.28364926	0.215203877	40	41.21551897	1.191032274	0.931603	17.14828575	0.47	0.774064504	0.407093946	0.028651389	10.94011517	1.565123564	0.437719145	11.4314967	0.79	0.8	0.002	0.16	0.18	0.15	0.92	0.853	0.002024	0.0016	0.135	0.009	0.03	0.023913787	0.040979216	0.077396708	0.503994631	0.592327176	0.376246872	14.94518774	0.13194804	45.09552181	2.874457911	1.438153137	0.5	0.5	0.815093841	28.93445186	2	1.111590073	292.6883
143	1	0	pop_healthy_1000_anth	75.42831787	0.241172511	40	42.46848309	1.293208939	1.164938461	17.68492853	0.47	0.891497125	0.329567427	0.027478635	11.81432576	1.582034518	0.490248634	19.34239155	0.79	0.8	0.002	0.16	0.18	0.15	0.92	0.853	0.002024	0.0016	0.135	0.009	0.03	0.023111143	0.039991263	0.076180121	0.578802584	0.637718972	0.485586054	15.20115908	0.086658215	45.54032104	2.803125099	0.853803008	0.5	0.5	2.456748773	20.65219103	2	0.707778518	292.6883
144	1	0	pop_healthy_1000_anth	62.61077743	0.231937055	40	21.99218644	1.084207453	1.105620317	16.43007246	0.443307288	0.86165296	0.358173146	0.031026222	9.546606497	1.457637699	0.558524732	10.57470258	0.753097326	0.762630203	0.001906576	0.192031254	0.224843756	0.187369797	0.877024734	0.813154454	0.001929454	0.00152526	0.168632817	0.011242188	0.037473959	0.028221442	0.027852357	0.132930722	0.35044311	0.806561113	0.532604509	15.06646051	0.098141545	44.03705905	3.491377113	0.974148993	0.486349347	0.486349347	0.759743128	17.83360285	1.945386712	1.463514511	292.6883
145	1	0	pop_healthy_1000_anth	62.31491558	0.207225429	40	23.91661743	0.797127337	0.896417851	17.34101373	0.449722058	0.973875832	0.370537941	0.028907172	10.60176872	1.48727867	0.553696054	9.9887973	0.761965745	0.771610881	0.001929027	0.18433353	0.214066942	0.178389119	0.887352514	0.822730102	0.001952176	0.001543222	0.160550207	0.010703347	0.035677824	0.027445996	0.026934467	0.124774329	0.304304135	0.734654684	0.229952699	14.96638033	0.141315952	44.54250188	3.468445887	0.78530117	0.489629861	0.489629861	0.910940032	16.67572229	1.958511331	0.917707699	292.6883
146	1	0	pop_healthy_1000_anth	62.43652105	0.214919422	40	43.24076806	0.8296969	0.952444542	17.0443921	0.47	1.127645964	0.455902755	0.027340017	11.46236265	1.424419603	0.471296782	10.25993066	0.79	0.8	0.002	0.16	0.18	0.15	0.92	0.853	0.002024	0.0016	0.135	0.009	0.03	0.024253848	0.040529622	0.082984344	0.496711332	0.638513844	0.648682189	15.10223525	0.116819593	43.2525662	2.581136031	0.952575834	0.5	0.5	2.014502135	9.424893426	2	0.956007202	292.6883
147	1	0	pop_healthy_1000_anth	66.73515068	0.234681124	40	39.6546227	0.741723073	0.738018423	16.86313214	0.47	0.928454151	0.440428851	0.026128488	10.23727222	1.604066586	0.515227289	16.23539439	0.79	0.8	0.002	0.16	0.18	0.15	0.92	0.853	0.002024	0.0016	0.135	0.009	0.03	0.021731819	0.037455796	0.076087822	0.33160314	0.662560826	0.593728936	15.08471544	0.073109677	43.91683885	2.86481872	1.03195402	0.5	0.5	1.131340548	30.49649348	2	0.724532127	292.6883
148	1	0	pop_healthy_1000_anth	84.51871784	0.24537266	40	45.92381911	1.351820845	1.38020094	18.55937576	0.47	1.14560732	0.468179819	0.027285811	13.5738522	1.682927512	0.52628515	17.11559979	0.79	0.8	0.002	0.16	0.18	0.15	0.92	0.853	0.002024	0.0016	0.135	0.009	0.03	0.022532772	0.037698943	0.079448634	0.588055207	0.609396115	0.624111149	14.98828909	0.103335678	45.14725854	2.586903591	0.96104852	0.5	0.5	1.756335532	12.89287147	2	1.355804597	292.6883
149	1	0	pop_healthy_1000_anth	67.20252267	0.230895067	40	32.08380206	1.023270566	1.148301259	17.06025274	0.47	0.896506914	0.354314907	0.026506962	11.45220934	1.557433458	0.516588591	13.74905787	0.79	0.8	0.002	0.16	0.18	0.15	0.92	0.853	0.002024	0.0016	0.135	0.009	0.03	0.022087235	0.041692376	0.077697486	0.496510302	0.598130837	0.232360446	14.65462183	0.185242197	45.08651532	3.117411272	1.461821533	0.5	0.5	0.592811478	44.85325157	2	0.794697156	292.6883
150	1	0	pop_healthy_1000_anth	67.14869382	0.231122699	40	21.80084659	1.383675047	0.862425464	17.04501879	0.442669489	0.884271527	0.38755318	0.029793229	10.28369438	1.464231398	0.525242559	13.80429403	0.752215568	0.761737284	0.001904343	0.192796614	0.225915259	0.188262716	0.875997877	0.812202379	0.001927195	0.001523475	0.169436444	0.011295763	0.037652543	0.029663281	0.027709034	0.142051226	0.28214238	0.721594145	0.480205073	14.82082794	0.080563619	44.3286717	3.565997076	0.819613404	0.486023176	0.486023176	0.55739733	21.98494681	1.944081774	0.561653359	292.6883
151	1	0	pop_healthy_1000_anth	61.89856174	0.234184531	40	27.52043337	1.397692923	1.179731775	16.25777755	0.461734778	0.978412931	0.384264451	0.030132283	9.760766603	1.539135105	0.516062586	14.62463116	0.77857333	0.788428689	0.001971072	0.169918267	0.193885573	0.161571311	0.906692992	0.84066209	0.001994725	0.001576857	0.14541418	0.009694279	0.032314262	0.023524302	0.035772238	0.09551988	0.289597675	0.621318418	0.441807509	14.67619866	0.104173792	44.20084424	3.326935768	0.925986306	0.495773165	0.495773165	1.005834698	14.84703246	1.983089356	0.737278086	292.6883
152	1	0	pop_healthy_1000_anth	75.54233709	0.223988277	40	29.05046421	1.073094864	0.935858957	18.36464612	0.466834881	0.951992428	0.416135024	0.025703141	12.58667317	1.568253441	0.509061976	15.60729742	0.785624223	0.795568833	0.001988922	0.163798143	0.1853174	0.154431167	0.914904158	0.848275268	0.002012789	0.001591138	0.13898805	0.00926587	0.030886233	0.022578417	0.041741956	0.097714082	0.478904208	0.639769868	0.665808456	14.84988716	0.107087477	43.21900819	2.957026162	0.620858991	0.498381358	0.498381358	4.173342388	14.80381547	1.993524166	0.647648907	292.6883
153	1	0	pop_healthy_1000_anth	70.20373061	0.212756191	40	23.43003605	1.074588114	1.153073314	18.16515017	0.44810012	0.969400917	0.417475362	0.03236319	11.74587941	1.550272139	0.508230249	13.25498361	0.759723416	0.769340168	0.00192335	0.186279856	0.216791798	0.180659832	0.884741193	0.820308954	0.001946431	0.00153868	0.162593849	0.01083959	0.036131966	0.025198399	0.033294014	0.119026726	0.435759089	0.755686566	0.549916751	15.05703606	0.136772345	43.95178477	3.28730357	1.362482029	0.488800401	0.488800401	0.898179666	18.44191531	1.955192846	1.807061282	292.6883
154	1	0	pop_healthy_1000_anth	74.51132579	0.217072163	40	38.98463943	0.863003709	1.149477609	18.52716965	0.47	1.209241084	0.387888511	0.029498037	13.69795085	1.527221541	0.464741699	16.49120207	0.79	0.8	0.002	0.16	0.18	0.15	0.92	0.853	0.002024	0.0016	0.135	0.009	0.03	0.022902026	0.040571254	0.073488538	0.467267511	0.586932643	0.427492219	14.81565193	0.09368356	44.25394729	2.73327174	0.786068645	0.5	0.5	0.798447456	22.67782131	2	0.82040684	292.6883
155	1	0	pop_healthy_1000_anth	65.81000491	0.229864972	40	20.71252992	0.738868654	0.957795418	16.9203586	0.439041766	0.797183066	0.358498637	0.029945153	9.755979171	1.486299967	0.515673213	15.39154966	0.747200242	0.756658473	0.001891646	0.19714988	0.232009832	0.193341527	0.870157244	0.806787097	0.001914346	0.001513317	0.174007374	0.011600492	0.038668305	0.02733964	0.027460479	0.123969219	0.336931879	0.729209348	0.362904568	14.94764114	0.078699918	44.66615493	3.174143236	1.109045203	0.484167959	0.484167959	0.903836058	16.8225837	1.936659454	1.01033189	292.6883
156	1	0	pop_healthy_1000_anth	69.07665227	0.23320897	40	22.63582323	1.267706683	0.914331163	17.21048127	0.445452744	0.93178926	0.389973067	0.031625633	10.4166629	1.429854156	0.498605486	14.06231947	0.756063419	0.765633842	0.001914085	0.189456707	0.22123939	0.184366158	0.880478918	0.816357084	0.001937054	0.001531268	0.165929542	0.011061969	0.036873232	0.025728149	0.028293098	0.115210966	0.234719117	0.666043526	0.377976277	14.79308127	0.084280852	45.13422123	3.23634478	1.015852926	0.487446533	0.487446533	0.763240899	17.12493788	1.949776314	0.740471009	292.6883
157	1	0	pop_healthy_1000_anth	70.48598458	0.214790194	40	34.11718321	1.031393388	0.989571724	18.11524282	0.47	0.972324535	0.420849311	0.025123734	12.49167243	1.487190215	0.518809694	13.10120818	0.79	0.8	0.002	0.16	0.18	0.15	0.92	0.853	0.002024	0.0016	0.135	0.009	0.03	0.021808707	0.040124624	0.084519488	0.37130614	0.573360413	0.570963049	14.75098659	0.113144776	43.76686295	2.914667296	1.033741238	0.5	0.5	0.397368482	11.65690622	2	1.038550972	292.6883
158	1	0	pop_healthy_1000_anth	66.68049653	0.23521592	40	24.86404389	1.050932728	1.024109199	16.83705211	0.452880146	0.824041688	0.375752149	0.030904071	10.29095438	1.501401637	0.549947467	13.29362155	0.766331802	0.776032205	0.001940081	0.180543824	0.208761354	0.173967795	0.892437036	0.827444338	0.001963361	0.001552064	0.156571016	0.010438068	0.034793559	0.025812516	0.02896152	0.102746352	0.433503632	0.708322704	0.459776964	15.04766105	0.137692146	45.3149553	3.138513147	1.044222636	0.491244907	0.491244907	0.758892861	10.88859512	1.964972779	0.999832571	292.6883
159	1	0	pop_healthy_1000_anth	60.79049106	0.239690423	40	22.45766182	0.872173646	1.035538659	15.92547832	0.444858873	0.825745368	0.419160386	0.030733147	8.984235169	1.433514342	0.556636799	8.959318885	0.755242392	0.764802422	0.001912006	0.190169353	0.222237094	0.185197578	0.879522785	0.815470582	0.00193495	0.001529605	0.16667782	0.011111855	0.037039516	0.026540679	0.029055528	0.125626199	0.331400529	0.786492793	0.298197398	15.09191956	0.127790816	44.13504065	3.504941835	1.190299936	0.487142828	0.487142828	0.910631484	15.14782391	1.948561254	0.836837315	292.6883
160	1	0	pop_healthy_1000_anth	63.33350278	0.2459598	40	52.16708487	0.996009555	0.877854594	16.04666139	0.47	0.828120012	0.341590778	0.024657966	9.834985842	1.526693125	0.478550011	13.77466438	0.79	0.8	0.002	0.16	0.18	0.15	0.92	0.853	0.002024	0.0016	0.135	0.009	0.03	0.023090579	0.031366263	0.074922294	0.329364766	0.600164088	0.159404711	15.28324754	0.085791699	44.83673183	2.264145636	0.597287416	0.5	0.5	0.449947378	20.87315716	2	1.71637367	292.6883
161	1	0	pop_healthy_1000_anth	67.19318713	0.219053119	40	52.74162914	1.151494244	0.730478774	17.514103	0.47	0.846384506	0.423580724	0.027425485	12.45382428	1.493137473	0.473045727	12.25217986	0.79	0.8	0.002	0.16	0.18	0.15	0.92	0.853	0.002024	0.0016	0.135	0.009	0.03	0.022140423	0.03371494	0.073513294	0.29635305	0.628838195	0.50081665	15.14329348	0.133782041	45.32942425	2.260497673	1.414391357	0.5	0.5	0.55399863	10.03735285	2	1.346436343	292.6883
162	1	0	pop_healthy_1000_anth	61.87367841	0.199033012	40	31.68110682	1.289458857	1.390008475	17.63154664	0.47	0.986740478	0.410709729	0.026946136	12.03703522	1.551205783	0.501894909	6.709299208	0.79	0.8	0.002	0.16	0.18	0.15	0.92	0.853	0.002024	0.0016	0.135	0.009	0.03	0.020814239	0.040852653	0.077842353	0.452017683	0.61735576	0.544045811	14.86744003	0.105056463	42.77519572	2.853040252	0.950879279	0.5	0.5	1.862366812	19.91656258	2	1.001308112	292.6883
163	1	0	pop_healthy_1000_anth	81.27963363	0.237491512	40	48.04201405	0.839107264	1.04663162	18.49979102	0.47	0.893982954	0.437476567	0.029435764	12.78178345	1.470186617	0.491014934	15.33129717	0.79	0.8	0.002	0.16	0.18	0.15	0.92	0.853	0.002024	0.0016	0.135	0.009	0.03	0.020301634	0.036795405	0.076793727	0.273809542	0.631788167	0.579762569	15.02968567	0.108674194	45.43974983	2.289879917	1.215220366	0.5	0.5	2.415190164	39.50294134	2	0.933932651	292.6883
164	1	0	pop_healthy_1000_anth	61.55286836	0.232050942	40	24.22358673	0.86124662	0.896248401	16.28667686	0.450745289	0.876015323	0.391994454	0.029574541	9.55840713	1.484468586	0.542007539	9.164960575	0.763380362	0.773043405	0.001932609	0.183105653	0.212347914	0.176956595	0.888999915	0.82425753	0.0019558	0.001546087	0.159260936	0.010617396	0.035391319	0.025549782	0.03229873	0.120450209	0.446960743	0.775980104	0.467299186	14.44196811	0.12856251	43.81524721	3.199024717	0.368579879	0.490153141	0.490153141	0.893895219	12.07247599	1.960604862	0.899300501	292.6883
165	1	0	pop_healthy_1000_anth	70.27803214	0.238225321	40	52.70820053	0.924805304	0.932706028	17.17575497	0.47	1.126432467	0.525073082	0.027609368	11.02397194	1.526936453	0.515040223	15.43562979	0.79	0.8	0.002	0.16	0.18	0.15	0.92	0.853	0.002024	0.0016	0.135	0.009	0.03	0.0216877	0.034010997	0.078765768	0.479672447	0.68914135	0.502871139	15.13383469	0.122925904	46.02978398	2.440248696	0.775639429	0.5	0.5	1.052023871	9.833659394	2	0.748380376	292.6883
166	1	0	pop_healthy_1000_anth	73.59309434	0.226126342	40	55.13419645	0.895175881	0.846455613	18.0402667	0.47	0.881534732	0.309603003	0.027154229	11.8542403	1.548053434	0.447446262	11.21566394	0.79	0.8	0.002	0.16	0.18	0.15	0.92	0.853	0.002024	0.0016	0.135	0.009	0.03	0.022452415	0.034194283	0.084143843	0.337554012	0.640860955	0.535653719	15.51969929	0.100285377	46.53148877	2.251986831	1.939010878	0.5	0.5	1.536530143	8.253405604	2	0.687601745	292.6883
167	1	0	pop_healthy_1000_anth	65.8600099	0.201239755	40	26.80790345	1.212730577	1.071192292	18.09064308	0.459359678	1.031450606	0.451753696	0.029283686	12.11728174	1.444358604	0.506653046	9.107572711	0.775289755	0.785103549	0.001962759	0.172768386	0.197875741	0.164896451	0.902869082	0.83711666	0.001986312	0.001570207	0.148406806	0.009893787	0.03297929	0.024486251	0.033481261	0.095326909	0.428507994	0.713056842	0.467953015	15.46663379	0.159416402	44.50727174	3.21769705	1.453237131	0.494558539	0.494558539	2.035893821	15.83291567	1.978229901	1.19380407	292.6883
168	1	0	pop_healthy_1000_anth	61.4561338	0.239280883	40	59.7850126	0.948318448	1.115863286	16.02612835	0.47	0.816235198	0.300220222	0.027620012	9.766077539	1.516058513	0.48862834	12.3689056	0.79	0.8	0.002	0.16	0.18	0.15	0.92	0.853	0.002024	0.0016	0.135	0.009	0.03	0.022351475	0.036856232	0.079496089	0.411678781	0.684516322	0.539971517	14.7310038	0.084354253	44.20672749	1.900715914	0.408171477	0.5	0.5	2.815609237	16.94221693	2	0.557989249	292.6883
169	1	0	pop_healthy_1000_anth	91.3931659	0.242404869	40	26.09101635	0.63429881	0.982416738	19.41718155	0.456970054	0.965674491	0.450819896	0.03200267	13.92296472	1.605973224	0.476486924	18.61048306	0.7719861	0.781758076	0.001954395	0.175635935	0.201890308	0.168241924	0.899021788	0.833549549	0.001977848	0.001563516	0.151417731	0.010094515	0.033648385	0.025076412	0.040168402	0.107369322	0.432538962	0.696123551	0.494884203	14.92749558	0.121334149	46.1560492	3.297292825	0.54581508	0.493336486	0.493336486	0.557199679	17.43108589	1.973340731	0.836239237	292.6883
170	1	0	pop_healthy_1000_anth	66.81929516	0.222735249	40	34.12059554	0.980675964	0.840114558	17.32034222	0.47	1.141804566	0.456406266	0.027214912	11.79425576	1.498701933	0.494546226	12.81806022	0.79	0.8	0.002	0.16	0.18	0.15	0.92	0.853	0.002024	0.0016	0.135	0.009	0.03	0.021216022	0.039440658	0.079721731	0.405330338	0.648871235	0.336174206	14.70746823	0.12850551	43.66672128	2.853787743	0.970017793	0.5	0.5	0.517092648	5.897443549	2	0.96135049	292.6883
171	1	0	pop_healthy_1000_anth	63.76830872	0.205929764	40	20.62447723	0.985008842	1.115019999	17.59717239	0.438748257	0.888773724	0.368986643	0.033522528	10.66687767	1.556626651	0.502933056	14.77263137	0.746794466	0.75624756	0.001890619	0.197502091	0.232502928	0.19375244	0.869684694	0.806348961	0.001913306	0.001512495	0.174377196	0.011625146	0.038750488	0.025941066	0.027548878	0.133546135	0.344663401	0.799920763	0.351118511	15.01366914	0.113020668	46.8384927	3.677832468	1.147871595	0.484017859	0.484017859	2.093732493	11.83633291	1.936058935	0.850994996	292.6883
172	1	0	pop_healthy_1000_anth	70.72776175	0.240790131	40	55.2794937	1.234513005	0.697984777	17.13861076	0.47	1.328345177	0.432115146	0.027331171	11.27123689	1.398240846	0.435738085	12.54019699	0.79	0.8	0.002	0.16	0.18	0.15	0.92	0.853	0.002024	0.0016	0.135	0.009	0.03	0.021338067	0.034774217	0.082305198	0.330211518	0.618313116	0.603452513	15.08182492	0.087212561	45.23565351	2.169047991	0.765950738	0.5	0.5	1.218572561	20.35501258	2	1.085525667	292.6883
173	1	0	pop_healthy_1000_anth	60.86628117	0.216394962	40	52.17838883	1.34210045	0.688286579	16.77122601	0.47	0.708008249	0.340845218	0.026595539	10.98119142	1.472780748	0.461818966	6.127110889	0.79	0.8	0.002	0.16	0.18	0.15	0.92	0.853	0.002024	0.0016	0.135	0.009	0.03	0.023959886	0.031706988	0.076322896	0.560699559	0.602289788	0.434534329	14.76255525	0.085497828	44.85995251	2.265663741	0.657648806	0.5	0.5	0.716415468	7.489305924	2	0.614721906	292.6883
174	1	0	pop_healthy_1000_anth	60.37877728	0.20841532	40	51.45107371	1.171580184	0.937362759	17.02069687	0.47	1.073064974	0.454695598	0.026948856	11.74267847	1.548011667	0.467539385	6.759033089	0.79	0.8	0.002	0.16	0.18	0.15	0.92	0.853	0.002024	0.0016	0.135	0.009	0.03	0.019823879	0.036868901	0.081641099	0.409081309	0.612212824	0.401716616	14.92231534	0.127492575	43.83661873	2.381216675	0.898587839	0.5	0.5	1.968416446	23.73409755	2	0.876640484	292.6883
175	1	0	pop_healthy_1000_anth	74.02289319	0.212841032	40	27.83538517	1.384633116	1.000587572	18.64899144	0.462784617	1.01012105	0.398339796	0.024989813	13.00561792	1.530915662	0.522944606	12.00730295	0.780024733	0.789898464	0.001974746	0.168658459	0.192121843	0.160101536	0.908383234	0.842229237	0.001998443	0.001579797	0.144091382	0.009606092	0.032020307	0.023221235	0.037937097	0.096205206	0.482066192	0.675699817	0.253908481	15.23396602	0.116083004	43.20218996	3.062142978	0.891476876	0.496310053	0.496310053	1.407716599	13.01580187	1.985237327	0.794647904	292.6883
176	1	0	pop_healthy_1000_anth	60.01719876	0.237618367	40	56.95878766	1.312494759	0.988799678	15.89270628	0.47	0.910274693	0.287269249	0.029540996	9.35352101	1.521453184	0.471626626	11.99710828	0.79	0.8	0.002	0.16	0.18	0.15	0.92	0.853	0.002024	0.0016	0.135	0.009	0.03	0.022152975	0.033270093	0.082365662	0.347794094	0.681640163	0.587032969	14.60464207	0.15031194	43.81243996	1.943867329	0.576256659	0.5	0.5	1.515680555	14.65194446	2	1.298120784	292.6883
177	1	0	pop_healthy_1000_anth	67.92798274	0.235996506	40	47.7527737	0.929184363	0.883227749	16.96569176	0.47	0.780405598	0.501028069	0.029007537	10.45023321	1.570563625	0.51119056	11.84932097	0.79	0.8	0.002	0.16	0.18	0.15	0.92	0.853	0.002024	0.0016	0.135	0.009	0.03	0.021699232	0.035334863	0.080503472	0.448136154	0.616619084	0.486797586	14.76885	0.09146581	44.43568418	2.464092285	1.312917758	0.5	0.5	1.845519062	18.99153756	2	0.63342722	292.6883
178	1	0	pop_healthy_1000_anth	63.83335734	0.225653663	40	24.90521213	0.722760198	0.94728274	16.819096	0.453017374	0.943726895	0.399007376	0.029499154	10.37619324	1.565532384	0.492094071	11.4748465	0.766521519	0.776224323	0.001940561	0.180379151	0.208530812	0.173775677	0.892657972	0.827649185	0.001963848	0.001552449	0.156398109	0.010426541	0.034755135	0.027681127	0.03071695	0.111489161	0.407717007	0.655800059	0.380894244	14.77105171	0.098276275	44.01063412	3.193480191	0.648064004	0.491315085	0.491315085	0.555405383	15.64787733	1.965253547	1.336915042	292.6883
179	1	0	pop_healthy_1000_anth	67.75279062	0.224394071	40	26.00369996	0.983016489	0.900592583	17.37632397	0.456679	0.905698548	0.41929996	0.030975222	11.09041681	1.576492219	0.545138769	13.25089761	0.771583717	0.7813506	0.001953376	0.1759852	0.20237928	0.1686494	0.89855319	0.833115077	0.001976817	0.001562701	0.15178446	0.010118964	0.03372988	0.024693688	0.036317502	0.105512011	0.498687214	0.644780325	0.411274171	14.85797007	0.077324699	46.20014354	3.21958225	0.572497911	0.493187641	0.493187641	2.58040612	36.18233779	1.972745234	0.94556692	292.6883
180	1	0	pop_healthy_1000_anth	66.13835175	0.226206971	40	37.23288703	0.799857834	1.086877604	17.09911731	0.47	0.943851541	0.450548124	0.027625865	11.19668339	1.437328748	0.516599249	10.31190098	0.79	0.8	0.002	0.16	0.18	0.15	0.92	0.853	0.002024	0.0016	0.135	0.009	0.03	0.020766691	0.037122786	0.076216979	0.520073795	0.616541523	0.31215942	14.57169759	0.082458266	44.63725818	2.93592282	0.405079485	0.5	0.5	0.651157871	15.48314185	2	0.601017208	292.6883
181	1	0	pop_healthy_1000_anth	53.53990228	0.201107058	40	34.0709637	1.046762089	0.931457161	16.31642959	0.47	0.726787469	0.397652147	0.027981413	10.19266275	1.559509399	0.495016025	4.371574803	0.79	0.8	0.002	0.16	0.18	0.15	0.92	0.853	0.002024	0.0016	0.135	0.009	0.03	0.021817143	0.039516788	0.081189649	0.448344457	0.583157708	0.336867782	15.03092739	0.158218451	44.86002018	2.671763849	1.724958012	0.5	0.5	0.648397793	7.777815686	2	0.671434937	292.6883
182	1	0	pop_healthy_1000_anth	58.99708336	0.19713628	40	21.69338752	1.196691833	1.047927631	17.29943791	0.442311292	0.904520757	0.401656834	0.031507379	10.40166401	1.480503752	0.489393082	10.2064952	0.751720361	0.761235808	0.00190309	0.19322645	0.22651703	0.188764192	0.87542118	0.811667681	0.001925927	0.001522472	0.169887772	0.011325851	0.037752838	0.029137977	0.027540531	0.128597723	0.397457279	0.769269251	0.355880566	14.89772772	0.131722761	45.38438566	3.653051359	3.253960361	0.485839995	0.485839995	1.485031963	39.94248434	1.943348903	0.698533165	292.6883
183	1	0	pop_healthy_1000_anth	76.10857933	0.243120648	40	57.1810306	1.100457851	1.116395909	17.69317958	0.47	0.969502449	0.501990548	0.0277502	11.74840097	1.379799345	0.471335466	14.02587999	0.79	0.8	0.002	0.16	0.18	0.15	0.92	0.853	0.002024	0.0016	0.135	0.009	0.03	0.021290553	0.035031686	0.083588963	0.415482604	0.684354104	0.393194903	15.1544268	0.099076009	41.4466579	2.130784823	2.316879585	0.5	0.5	0.942542176	7.386372331	2	0.596579332	292.6883
184	1	0	pop_healthy_1000_anth	66.85778398	0.236941094	40	23.4476663	1.403493357	0.916477494	16.79793105	0.448158888	0.887536229	0.401087535	0.03312914	10.02668148	1.380602695	0.577631212	14.40309829	0.759804662	0.769422443	0.001923556	0.186209335	0.216693069	0.180577557	0.884835809	0.82039668	0.001946639	0.001538845	0.162519802	0.010834653	0.036115511	0.02744064	0.030866409	0.11856621	0.373087059	0.731554395	0.251970982	15.32141909	0.128100304	43.56086624	3.125137411	3.396623116	0.488830455	0.488830455	1.035719234	24.32785273	1.955313084	1.193589328	292.6883
185	1	0	pop_healthy_1000_anth	72.83681115	0.245399291	40	25.00119709	0.866791654	1.026045945	17.22815656	0.453337324	0.903878515	0.385909823	0.028057109	10.74248873	1.59470402	0.494132264	12.96574108	0.76696385	0.776672253	0.001941681	0.179995212	0.207993296	0.173327747	0.893173091	0.82812679	0.001964981	0.001553345	0.155994972	0.010399665	0.034665549	0.026181863	0.034769198	0.108590246	0.42946116	0.698983709	0.413777512	14.82395214	0.114622293	42.49036033	2.94906724	1.940526574	0.491478707	0.491478707	1.139164642	6.378913243	1.965908164	0.984154392	292.6883
186	1	0	pop_healthy_1000_anth	70.49368096	0.213156397	40	22.01456569	1.21789984	0.845502639	18.18552777	0.443381886	0.938845365	0.398331727	0.033478533	11.60754967	1.367610775	0.538128524	9.411782857	0.753200457	0.76273464	0.001906837	0.191941737	0.224718432	0.18726536	0.877144836	0.81326581	0.001929719	0.001525469	0.168538824	0.011235922	0.037453072	0.027851348	0.029274779	0.134024795	0.335093544	0.780000715	0.345758618	14.81496782	0.095842043	45.35080529	3.238680956	0.960912685	0.486387496	0.486387496	2.63462236	29.42646745	1.945539338	1.308233838	292.6883
187	1	0	pop_healthy_1000_anth	72.10129167	0.22202575	40	28.52441267	0.954391597	0.937574196	18.020625	0.465081376	0.988219177	0.428854067	0.028441964	12.34561138	1.619191921	0.488446738	11.5867411	0.783200002	0.793113926	0.001982785	0.165902349	0.188263289	0.156886074	0.912081015	0.845657723	0.002006578	0.001586228	0.141197467	0.009413164	0.031377215	0.022935762	0.03735831	0.083808656	0.296823925	0.665300597	0.333959553	15.30558472	0.123129918	44.13227816	3.013763482	0.744823751	0.497484615	0.497484615	0.897078748	16.70021777	1.989936494	1.272187359	292.6883
188	1	0	pop_healthy_1000_anth	61.06126975	0.214351545	40	53.65034483	1.176241046	0.873478515	16.87794652	0.47	0.934147435	0.418210044	0.027180538	10.6498535	1.485696755	0.486482602	11.35389917	0.79	0.8	0.002	0.16	0.18	0.15	0.92	0.853	0.002024	0.0016	0.135	0.009	0.03	0.022511171	0.037198203	0.082963343	0.515340047	0.65504988	0.504001164	15.16181479	0.115474864	45.46399302	2.470856475	1.844353798	0.5	0.5	0.381786657	23.53568839	2	1.052425779	292.6883
189	1	0	pop_healthy_1000_anth	88.57136871	0.240265056	40	50.24443183	0.784915382	0.825325222	19.20000635	0.47	0.468863801	0.539748446	0.028818031	14.02656218	1.443136523	0.478016807	14.94285888	0.79	0.8	0.002	0.16	0.18	0.15	0.92	0.853	0.002024	0.0016	0.135	0.009	0.03	0.021418704	0.034961474	0.07699395	0.401695062	0.623135347	0.463330017	15.02546338	0.104927648	45.40101015	2.197599815	1.114175178	0.5	0.5	0.698816479	18.61158121	2	1.045724157	292.6883
190	1	0	pop_healthy_1000_anth	72.82021927	0.238480865	40	44.4112955	0.998170699	0.897229295	17.47427724	0.47	1.0000627	0.470935182	0.027014953	11.4871422	1.415160518	0.484303487	18.56724393	0.79	0.8	0.002	0.16	0.18	0.15	0.92	0.853	0.002024	0.0016	0.135	0.009	0.03	0.023033665	0.040013658	0.080453368	0.437066811	0.615861921	0.52234354	15.00642757	0.121511252	45.44322797	2.47339225	0.58614114	0.5	0.5	1.738757545	21.93897888	2	1.105079226	292.6883
191	1	0	pop_healthy_1000_anth	74.68543081	0.221939612	40	42.15513216	0.932547492	0.799544239	18.34427424	0.47	0.947092469	0.448760292	0.028208391	13.27375765	1.465185582	0.512004688	10.61485694	0.79	0.8	0.002	0.16	0.18	0.15	0.92	0.853	0.002024	0.0016	0.135	0.009	0.03	0.021598423	0.04150306	0.075925428	0.419743177	0.648611974	0.439315606	15.23812436	0.095365541	44.35977178	2.672447574	0.540248769	0.5	0.5	0.832261989	10.87665168	2	0.866378055	292.6883
192	1	0	pop_healthy_1000_anth	67.22091472	0.217125914	40	39.89808681	0.965297404	0.902520593	17.59528795	0.47	0.845156787	0.335281413	0.027888255	11.64305707	1.515869857	0.528060766	7.100343946	0.79	0.8	0.002	0.16	0.18	0.15	0.92	0.853	0.002024	0.0016	0.135	0.009	0.03	0.020293095	0.042585847	0.083947514	0.401296196	0.611385269	0.571389101	14.73001693	0.120596657	44.39738849	2.656029935	1.849438502	0.5	0.5	1.134168896	26.87069242	2	0.756409293	292.6883
193	1	0	pop_healthy_1000_anth	69.03469354	0.237037912	40	58.0077636	1.228422417	1.309708586	17.06572702	0.47	0.84688004	0.424158764	0.02673668	10.62502448	1.460230539	0.485716929	15.28948701	0.79	0.8	0.002	0.16	0.18	0.15	0.92	0.853	0.002024	0.0016	0.135	0.009	0.03	0.021868577	0.036652621	0.084831574	0.507276809	0.652149256	0.31504538	15.03710083	0.116688996	45.29272855	2.17075466	1.024661965	0.5	0.5	0.511043259	15.66548151	2	0.988629853	292.6883
194	1	0	pop_healthy_1000_anth	81.17614114	0.242716124	40	54.89149913	0.982126592	1.013233643	18.28794415	0.47	1.091655931	0.40231563	0.027682942	12.34308223	1.459642865	0.50997822	19.45632309	0.79	0.8	0.002	0.16	0.18	0.15	0.92	0.853	0.002024	0.0016	0.135	0.009	0.03	0.021889435	0.036299597	0.078623225	0.466293137	0.667461132	0.449355511	14.72770196	0.104443823	44.8573697	2.139280463	0.758569314	0.5	0.5	0.723273588	29.48433704	2	0.922678876	292.6883
195	1	0	pop_healthy_1000_anth	75.54938503	0.234235236	40	22.83831608	0.78374378	1.253797971	17.95929784	0.44612772	0.904688381	0.401337245	0.029431563	11.31659744	1.408137084	0.559416484	18.69783928	0.756996573	0.766578808	0.001916447	0.188646736	0.22010543	0.183421192	0.88156563	0.817364654	0.001939444	0.001533158	0.165079072	0.011005271	0.036684238	0.027713262	0.029164633	0.118341407	0.250394278	0.76201954	0.196241436	14.60210804	0.149818136	44.19029463	3.495620325	1.756478474	0.487791716	0.487791716	0.783761072	23.13194863	1.951157316	1.294113616	292.6883
196	1	0	pop_healthy_1000_anth	76.9517703	0.246674376	40	43.08967973	0.922981441	0.818323624	17.66230129	0.47	1.008668632	0.253371886	0.026849908	11.89555855	1.482995739	0.507080465	12.45003554	0.79	0.8	0.002	0.16	0.18	0.15	0.92	0.853	0.002024	0.0016	0.135	0.009	0.03	0.019970029	0.042088982	0.087298361	0.482242548	0.632965395	0.417129593	15.37240645	0.092682222	44.46679012	2.591671942	2.089654013	0.5	0.5	1.285709611	16.54254779	2	2.698418429	292.6883
197	1	0	pop_healthy_1000_anth	64.15807648	0.229874785	40	26.38669759	1.013565151	1.003852519	16.70628937	0.457955659	0.944730207	0.412143084	0.03230711	10.1326134	1.320423568	0.504330314	14.69136122	0.773348698	0.783137922	0.001957845	0.17445321	0.200234493	0.166862078	0.90060861	0.835020809	0.001981339	0.001566276	0.15017587	0.010011725	0.033372416	0.025328238	0.036845475	0.110615592	0.445219128	0.727678916	0.478875095	14.80579839	0.126440467	44.2915903	2.992354762	0.982580739	0.493840524	0.493840524	1.772000025	28.82988632	1.975357278	1.097343561	292.6883
198	1	0	pop_healthy_1000_anth	52.451477	0.218899694	40	21.42734271	0.784427069	1.377833229	15.47947702	0.441424476	0.765973515	0.376989076	0.031412487	8.512623507	1.364695472	0.511170606	10.91944759	0.750494338	0.759994266	0.001899986	0.194290629	0.228006881	0.190005734	0.873993406	0.810343886	0.001922785	0.001519989	0.171005161	0.011400344	0.038001147	0.02526601	0.023235678	0.12763456	0.376805212	0.766375632	0.358923885	14.87948837	0.173639718	43.95696321	3.361648492	1.642959415	0.485386477	0.485386477	0.796629273	20.87448049	1.941534477	1.698915353	292.6883
199	1	0	pop_healthy_1000_anth	68.00313874	0.239833178	40	59.20011777	0.780659624	1.205123552	16.83874997	0.47	0.963205248	0.481924731	0.026842153	11.23004507	1.489166992	0.495810856	14.41535114	0.79	0.8	0.002	0.16	0.18	0.15	0.92	0.853	0.002024	0.0016	0.135	0.009	0.03	0.020089531	0.032204445	0.084187258	0.700136558	0.612961013	0.310028	14.63463697	0.11474905	43.54811459	2.070117787	0.765196152	0.5	0.5	0.334590108	26.6735717	2	0.829083498	292.6883
200	1	0	pop_healthy_1000_anth	67.67454906	0.226438719	40	44.62350077	0.872059436	1.004589914	17.28770491	0.47	0.855240708	0.396975997	0.026988904	11.65910283	1.473085754	0.486087125	13.99815943	0.79	0.8	0.002	0.16	0.18	0.15	0.92	0.853	0.002024	0.0016	0.135	0.009	0.03	0.020841269	0.037986923	0.079702456	0.415606073	0.630070771	0.516509536	15.17243265	0.101894952	45.95425985	2.548916257	1.169047637	0.5	0.5	1.703294143	14.91145747	2	0.986630132	292.6883
201	1	0	pop_healthy_1000_anth	61.0464653	0.204554408	40	34.83178484	0.950577211	1.085590298	17.27530961	0.47	0.748299496	0.393735283	0.027934876	11.63882616	1.487427052	0.518194589	8.086047093	0.79	0.8	0.002	0.16	0.18	0.15	0.92	0.853	0.002024	0.0016	0.135	0.009	0.03	0.02162723	0.038527614	0.084248664	0.442652967	0.584518497	0.383388146	14.96870963	0.132367641	44.33954249	2.729337089	1.057559073	0.5	0.5	1.390397754	18.67753224	2	0.901371741	292.6883
202	1	0	pop_healthy_1000_anth	79.5362872	0.225379189	40	46.00750742	1.352316699	0.811422509	18.78562942	0.47	0.894955705	0.529143942	0.027447255	13.38437841	1.474119759	0.47695055	14.36185227	0.79	0.8	0.002	0.16	0.18	0.15	0.92	0.853	0.002024	0.0016	0.135	0.009	0.03	0.021325879	0.038424481	0.075034251	0.460635984	0.682659625	0.291389852	15.04451333	0.175853961	43.65814927	2.363413638	0.835363119	0.5	0.5	0.617843297	12.97818942	2	1.06602342	292.6883
203	1	0	pop_healthy_1000_anth	57.76943306	0.223676888	40	58.9695246	0.701677519	0.726941768	16.07083703	0.47	0.860481028	0.431349772	0.026834822	9.888771749	1.241782733	0.504587536	9.825147267	0.79	0.8	0.002	0.16	0.18	0.15	0.92	0.853	0.002024	0.0016	0.135	0.009	0.03	0.021686898	0.032515819	0.080030756	0.407998856	0.615579979	0.534706617	15.07026596	0.105420306	44.98483595	2.18626294	0.93514655	0.5	0.5	1.794501903	12.02369177	2	0.578786438	292.6883
204	1	0	pop_healthy_1000_anth	81.0523806	0.229753044	40	49.6341742	0.950930436	0.991278394	18.78245041	0.47	0.719473222	0.433730714	0.025511847	13.02074299	1.544417346	0.471702724	25.50719174	0.79	0.8	0.002	0.16	0.18	0.15	0.92	0.853	0.002024	0.0016	0.135	0.009	0.03	0.022482469	0.041038246	0.079008985	0.42244854	0.64678135	0.177827131	14.9745472	0.19163896	43.78403059	2.507784924	1.004650617	0.5	0.5	1.405881214	20.58453652	2	0.825835517	292.6883
205	1	0	pop_healthy_1000_anth	75.8531083	0.240966602	40	28.70927215	0.988119963	1.078728089	17.74223242	0.465697574	0.896849206	0.432345568	0.02953706	11.89737697	1.556596509	0.490700537	18.36245598	0.784051896	0.793976603	0.001984942	0.165162911	0.187228076	0.156023397	0.913073094	0.846577553	0.002008761	0.001587953	0.140421057	0.009361404	0.031204679	0.022306505	0.037753308	0.091031477	0.44108484	0.630460585	0.382408876	15.08269552	0.085867844	43.67718274	3.305996699	1.012313419	0.497799739	0.497799739	1.224286829	15.51219543	1.991197236	0.86816148	292.6883
206	1	0	pop_healthy_1000_anth	71.0044574	0.246985295	40	22.14246908	0.859211512	0.953548716	16.95536946	0.44380823	0.894820294	0.361817591	0.031152869	9.982894145	1.410781773	0.534189014	19.06181575	0.753789878	0.763331522	0.001908329	0.191430124	0.224002173	0.186668478	0.877831251	0.813902236	0.001931229	0.001526663	0.16800163	0.011200109	0.037333696	0.02669373	0.027814653	0.125352782	0.342485416	0.700661927	0.515966803	15.08074763	0.078721005	44.02862029	3.567531243	2.212950086	0.486605529	0.486605529	1.191072195	18.45182072	1.946411639	1.412158853	292.6883
207	1	0	pop_healthy_1000_anth	64.02459781	0.21039376	40	21.39450608	1.149977885	1.017628006	17.44443877	0.44131502	0.963622108	0.394583227	0.031860361	10.68637526	1.636161623	0.53102811	5.236811587	0.750343016	0.759841028	0.001899603	0.194421976	0.228190766	0.190158972	0.873817183	0.810180496	0.001922398	0.001519682	0.171143074	0.011409538	0.038031794	0.025007225	0.028155338	0.137503372	0.359968248	0.80293673	0.321492009	14.52743988	0.111342311	42.50925791	3.382036778	0.888185394	0.485330501	0.485330501	0.891586313	30.89977424	1.941310531	1.771975075	292.6883
208	1	0	pop_healthy_1000_anth	62.98288094	0.209925537	40	31.25756952	0.908232148	1.124817414	17.32122586	0.47	0.961966529	0.38887657	0.028599664	11.88720762	1.578160824	0.484921532	11.41765656	0.79	0.8	0.002	0.16	0.18	0.15	0.92	0.853	0.002024	0.0016	0.135	0.009	0.03	0.02040272	0.040046259	0.078227566	0.506023429	0.552983636	0.304462427	14.89991687	0.139669634	43.00054539	3.099307472	0.944369349	0.5	0.5	0.962182082	6.515222141	2	1.186638113	292.6883
209	1	0	pop_healthy_1000_anth	78.91553934	0.241663785	40	51.59239016	1.243613597	0.838177621	18.07072089	0.47	0.896217097	0.427120887	0.028071886	11.97043158	1.420967482	0.47243954	17.43307586	0.79	0.8	0.002	0.16	0.18	0.15	0.92	0.853	0.002024	0.0016	0.135	0.009	0.03	0.022087658	0.03376773	0.086403284	0.308863362	0.599406492	0.442640476	14.97976914	0.118010548	43.80943915	2.293547833	0.888284652	0.5	0.5	0.97564999	13.57404499	2	0.639533649	292.6883
210	1	0	pop_healthy_1000_anth	76.35353465	0.231221262	40	26.29683882	0.892662831	1.084076737	18.1719147	0.457656129	1.016989447	0.42239698	0.029952064	12.07280743	1.492226235	0.530712677	11.46457723	0.772934599	0.782718581	0.001956796	0.174812645	0.200737703	0.167281419	0.900126368	0.834573687	0.001980278	0.001565437	0.150553277	0.010036885	0.033456284	0.024486345	0.035110028	0.097911348	0.440678273	0.681285202	0.405939285	15.08837302	0.121374094	42.99836451	3.295828083	0.788138585	0.493687345	0.493687345	0.854396886	11.98674596	1.974744441	0.914147665	292.6883
211	1	0	pop_healthy_1000_anth	57.30701505	0.197837968	40	22.71280296	0.893888101	1.255465442	17.01958918	0.445709343	0.902930286	0.369493705	0.03102799	10.2197965	1.476149965	0.525366499	6.306036588	0.756418167	0.76599308	0.001914983	0.189148788	0.220808303	0.18400692	0.880892043	0.816740122	0.001937962	0.001531986	0.165606228	0.011040415	0.036801384	0.026683714	0.029014758	0.122939839	0.351722238	0.752220471	0.167493222	15.26343405	0.134892906	44.25897392	3.265804143	0.30142754	0.487577758	0.487577758	1.137971444	10.30982636	1.950301316	1.120252223	292.6883
212	1	0	pop_healthy_1000_anth	73.16231972	0.210866531	40	25.59232539	0.800025731	1.547464781	18.62687098	0.455307751	0.981266931	0.409761354	0.02732885	12.38790916	1.455278278	0.507674574	15.93630563	0.769687966	0.779430852	0.001948577	0.177630698	0.204682978	0.170569148	0.89634548	0.831068146	0.00197196	0.001558862	0.153512233	0.010234149	0.03411383	0.026357935	0.03953521	0.11454663	0.357255029	0.713691339	0.380065753	15.08627545	0.15366844	43.60573358	3.181301515	0.661802295	0.492486384	0.492486384	0.807742376	19.95657534	1.969939659	1.122739928	292.6883
213	1	0	pop_healthy_1000_anth	55.02377152	0.207374534	40	20.77538854	1.121733189	1.036635821	16.2891141	0.439251295	0.789899487	0.399864493	0.031368152	9.103728406	1.374556017	0.563448835	11.5787343	0.747489916	0.756951813	0.00189238	0.196898446	0.231657824	0.193048187	0.870494585	0.807099871	0.001915088	0.001513904	0.173743368	0.011582891	0.038609637	0.025459401	0.027238492	0.133352667	0.385565636	0.826259134	0.300211634	15.0338423	0.173654255	43.59059319	3.292959944	0.678592465	0.484275112	0.484275112	0.276314412	13.99161251	1.93708815	0.558444523	292.6883
214	1	0	pop_healthy_1000_anth	69.92541316	0.232181022	40	56.6208661	0.970979894	0.893298002	17.35418255	0.47	0.574866029	0.497197475	0.029698704	12.48005875	1.477447578	0.471703545	16.8425451	0.79	0.8	0.002	0.16	0.18	0.15	0.92	0.853	0.002024	0.0016	0.135	0.009	0.03	0.022168974	0.03231619	0.079917607	0.254980644	0.657498116	0.483342141	15.14211425	0.082628816	45.54845324	2.222337962	0.829505179	0.5	0.5	1.295197435	22.83274761	2	1.165101875	292.6883
215	1	0	pop_healthy_1000_anth	76.09564542	0.206731142	40	28.57281987	1.248832252	1.157389237	19.18566914	0.465242733	0.999007525	0.460306007	0.027834799	13.73784234	1.509813767	0.544814215	11.12405541	0.783423078	0.793339826	0.00198335	0.165708721	0.187992209	0.156660174	0.9123408	0.84589859	0.00200715	0.00158668	0.140994157	0.00939961	0.031332035	0.022597872	0.043289104	0.084586633	0.438925562	0.629202566	0.530384337	15.22228904	0.103163902	43.11439489	3.02225752	1.342400497	0.497567134	0.497567134	1.180991049	16.23506577	1.990266632	0.889703865	292.6883
216	1	0	pop_healthy_1000_anth	71.17588555	0.218389717	40	40.89197614	0.737956271	0.839765667	18.05304012	0.47	1.184409361	0.407757073	0.028017879	12.16600971	1.61967509	0.531984318	13.53786409	0.79	0.8	0.002	0.16	0.18	0.15	0.92	0.853	0.002024	0.0016	0.135	0.009	0.03	0.02108147	0.042088013	0.083284887	0.506221638	0.547697043	0.389662983	14.82579487	0.083177906	44.02619131	2.749649981	1.137230461	0.5	0.5	0.301382046	12.88476371	2	0.84748317	292.6883
217	1	0	pop_healthy_1000_anth	78.31675598	0.235322849	40	53.09574404	0.842117656	1.253072752	18.24295959	0.47	0.749827313	0.321890016	0.02791867	12.9942	1.527442501	0.448801183	15.19773994	0.79	0.8	0.002	0.16	0.18	0.15	0.92	0.853	0.002024	0.0016	0.135	0.009	0.03	0.021857518	0.034783712	0.079965905	0.27131156	0.686156119	0.348066317	14.78886333	0.126253153	45.104261	2.27940133	1.491314073	0.5	0.5	0.707527647	21.29361299	2	0.924621562	292.6883
218	1	0	pop_healthy_1000_anth	60.95915209	0.236365504	40	57.8056117	0.92098629	1.014147211	16.05932961	0.47	0.926150371	0.511897547	0.026410032	9.581795734	1.395673783	0.4891626	14.08063255	0.79	0.8	0.002	0.16	0.18	0.15	0.92	0.853	0.002024	0.0016	0.135	0.009	0.03	0.020814351	0.029710639	0.080167072	0.512298938	0.626176134	0.362988614	14.95421658	0.137024085	42.33483035	2.299682746	0.162643823	0.5	0.5	2.19543388	14.89376025	2	1.250726372	292.6883
219	1	0	pop_healthy_1000_anth	81.61894219	0.221470707	40	43.23939468	1.262703029	1.045622557	19.19717551	0.47	1.369902162	0.428815845	0.026141203	14.99006021	1.619801768	0.471737067	16.88285019	0.79	0.8	0.002	0.16	0.18	0.15	0.92	0.853	0.002024	0.0016	0.135	0.009	0.03	0.02168948	0.040968178	0.084394943	0.52895042	0.631000066	0.548363691	14.80700641	0.114528206	43.43225349	2.875553692	1.337782578	0.5	0.5	2.06146055	22.33234955	2	1.042406561	292.6883
220	1	0	pop_healthy_1000_anth	67.7635524	0.232781479	40	51.13415459	1.756113916	1.154142071	17.06176168	0.47	0.990837363	0.461493875	0.027986165	10.78036462	1.607446289	0.491699778	18.44164589	0.79	0.8	0.002	0.16	0.18	0.15	0.92	0.853	0.002024	0.0016	0.135	0.009	0.03	0.020525537	0.03408004	0.084691637	0.396339882	0.604929628	0.260342138	14.70368997	0.050405405	44.51265583	2.404267771	1.324228826	0.5	0.5	0.578022645	7.686534079	2	1.460623456	292.6883
221	1	0	pop_healthy_1000_anth	65.96698078	0.239615679	40	59.52691749	0.824326945	1.004199942	16.59226546	0.47	0.688979175	0.203429182	0.028366811	9.730786559	1.626417652	0.481181355	15.74411885	0.79	0.8	0.002	0.16	0.18	0.15	0.92	0.853	0.002024	0.0016	0.135	0.009	0.03	0.023091304	0.032804369	0.080233666	0.494954405	0.680062656	0.567203091	14.81261838	0.119050173	44.28669655	1.972190679	1.579095909	0.5	0.5	2.657690707	24.20698041	2	1.159035134	292.6883
222	1	0	pop_healthy_1000_anth	59.1087387	0.223961689	40	23.11694676	0.899708048	0.885255532	16.24572058	0.447056489	0.833284449	0.382912563	0.030882828	9.515601654	1.428480706	0.503129402	16.68008631	0.758280596	0.767879085	0.001919698	0.187532213	0.218545098	0.182120915	0.883060948	0.818751074	0.001942734	0.001535758	0.163908824	0.010927255	0.036424183	0.026637055	0.027773623	0.120420403	0.337348823	0.718525248	0.511696789	15.24219536	0.132079721	45.04755927	3.253628514	1.00384159	0.488266689	0.488266689	1.356903919	15.06375828	1.953057577	1.252298707	292.6883
223	1	0	pop_healthy_1000_anth	69.25104485	0.225984497	40	28.26411931	1.215074527	1.041428183	17.50547267	0.464213731	0.963588891	0.408889527	0.029093688	11.42451905	1.545203807	0.533112588	11.86736297	0.782000483	0.791899223	0.001979748	0.166943523	0.189720932	0.158100777	0.910684107	0.844362547	0.002003505	0.001583798	0.142290699	0.009486047	0.031620155	0.023013722	0.036150542	0.09046317	0.286791398	0.63674572	0.324041122	15.07320976	0.10793819	44.34451303	2.949009806	1.132756002	0.497040902	0.497040902	1.173345148	19.97032621	1.988161294	1.091449206	292.6883
224	1	0	pop_healthy_1000_anth	68.43237894	0.236670105	40	40.59184686	0.676386056	1.105689239	17.00431406	0.47	1.02517719	0.347213349	0.027024338	11.70761417	1.530990602	0.484670648	16.35659381	0.79	0.8	0.002	0.16	0.18	0.15	0.92	0.853	0.002024	0.0016	0.135	0.009	0.03	0.021209028	0.038838529	0.082375605	0.418389439	0.690832499	0.370392165	15.37232675	0.120227936	45.16610859	2.830607775	0.713849238	0.5	0.5	0.572389944	10.05311785	2	1.487285984	292.6883
225	1	0	pop_healthy_1000_anth	65.90625362	0.236425093	40	45.40486268	0.959324018	1.301693355	16.69615732	0.47	1.074889714	0.483143412	0.029649155	10.74621852	1.514167454	0.487392907	13.27328633	0.79	0.8	0.002	0.16	0.18	0.15	0.92	0.853	0.002024	0.0016	0.135	0.009	0.03	0.021960052	0.035426852	0.077525808	0.443382311	0.632469231	0.487303731	14.6305816	0.148871966	43.22926796	2.801462711	1.362636386	0.5	0.5	1.002816898	33.66279863	2	0.830754261	292.6883
226	1	0	pop_healthy_1000_anth	68.71153323	0.242763222	40	26.34686306	1.148421853	0.950072803	16.82377196	0.457822877	0.858691511	0.404122568	0.028611118	10.52565217	1.472801132	0.531307127	13.45252402	0.773165127	0.782952028	0.00195738	0.174612548	0.200457567	0.167047972	0.900394832	0.834822599	0.001980869	0.001565904	0.150343175	0.010022878	0.033409594	0.025381878	0.031596914	0.099380314	0.470698389	0.688231898	0.603475162	14.87668923	0.143227794	45.47206072	3.051666064	0.745596167	0.493772619	0.493772619	1.396199713	20.74974807	1.975085606	1.007988299	292.6883
227	1	0	pop_healthy_1000_anth	70.06914404	0.233150479	40	59.7264331	0.909657934	1.168345704	17.33585438	0.47	0.909726897	0.372722657	0.028010643	10.75986659	1.340932767	0.462369582	14.98453567	0.79	0.8	0.002	0.16	0.18	0.15	0.92	0.853	0.002024	0.0016	0.135	0.009	0.03	0.02242784	0.033140978	0.084444077	0.544210159	0.630577645	0.423892716	15.09524573	0.082979221	43.13193835	1.821170266	0.578089108	0.5	0.5	0.486511611	24.83936354	2	1.385266918	292.6883
228	1	0	pop_healthy_1000_anth	68.05852985	0.209602615	40	37.14714181	0.793127671	1.331467241	18.0195082	0.47	0.920851472	0.417999632	0.026710879	12.34740996	1.528527333	0.458910655	10.57202957	0.79	0.8	0.002	0.16	0.18	0.15	0.92	0.853	0.002024	0.0016	0.135	0.009	0.03	0.021830705	0.044471115	0.084980801	0.477332914	0.653816776	0.379782972	14.93182228	0.098869126	45.29745179	2.979868608	1.35872175	0.5	0.5	0.847024147	9.513884309	2	0.887369428	292.6883
229	1	0	pop_healthy_1000_anth	77.57877667	0.234592072	40	48.63593101	1.122526974	0.846918988	18.1850625	0.47	1.022258587	0.291360933	0.027163427	12.71107084	1.594724845	0.445577832	16.87774145	0.79	0.8	0.002	0.16	0.18	0.15	0.92	0.853	0.002024	0.0016	0.135	0.009	0.03	0.020755074	0.035034019	0.075546759	0.300708326	0.663137944	0.364487807	14.97875747	0.092633398	46.41455249	2.30189661	1.444861971	0.5	0.5	0.926620943	16.63328754	2	1.129097427	292.6883
230	1	0	pop_healthy_1000_anth	56.06334732	0.227018174	40	25.45587311	1.073625057	0.969812445	15.71481234	0.45485291	0.843330286	0.368896001	0.03094497	9.046615948	1.47195014	0.550156008	8.298604989	0.769059149	0.778794075	0.001946985	0.178176508	0.205447111	0.171205925	0.895613186	0.830389182	0.001970349	0.001557588	0.154085333	0.010272356	0.034241185	0.023957208	0.029970758	0.114595059	0.294065992	0.71193071	0.289491235	15.08035277	0.130427074	44.18187515	3.420477124	0.51020421	0.492253778	0.492253778	0.515708993	27.54266711	1.969009055	1.040381158	292.6883
231	1	0	pop_healthy_1000_anth	50.53342753	0.226450757	40	57.18649415	0.961432432	0.797125803	14.93834514	0.47	0.873906368	0.279607296	0.025853345	8.51579885	1.525745622	0.481695274	8.61562003	0.79	0.8	0.002	0.16	0.18	0.15	0.92	0.853	0.002024	0.0016	0.135	0.009	0.03	0.021167376	0.030111411	0.079378146	0.288349171	0.715936315	0.212235153	14.92957746	0.143532078	43.67480056	1.996936894	0.448197466	0.5	0.5	1.241196065	23.19540318	2	0.628520271	292.6883
232	1	0	pop_healthy_1000_anth	72.24625663	0.242421938	40	48.26787061	0.93706078	1.11437179	17.26321644	0.47	0.96345344	0.334055351	0.029682058	10.71886013	1.608280748	0.468853334	14.8464917	0.79	0.8	0.002	0.16	0.18	0.15	0.92	0.853	0.002024	0.0016	0.135	0.009	0.03	0.022184877	0.035447607	0.082305584	0.648868517	0.664755985	0.452491126	14.85067897	0.131386736	43.66887442	2.560095911	1.098126658	0.5	0.5	1.938026714	14.9535203	2	1.075916913	292.6883
233	1	0	pop_healthy_1000_anth	60.01470861	0.209494885	40	52.32114032	1.117353432	1.091562271	16.92552462	0.47	1.140180635	0.424757596	0.025166176	10.95657783	1.378214561	0.445452281	7.636708894	0.79	0.8	0.002	0.16	0.18	0.15	0.92	0.853	0.002024	0.0016	0.135	0.009	0.03	0.023450168	0.034073191	0.074878776	0.407804667	0.600498113	0.406404271	15.07308594	0.109754896	43.94687164	2.322860675	1.50952669	0.5	0.5	0.71914911	26.66845451	2	0.687646623	292.6883
234	1	0	pop_healthy_1000_anth	71.52860028	0.236939161	40	53.23940031	1.133862291	1.209964614	17.37486506	0.47	0.655930478	0.485612572	0.027427349	11.38786301	1.482005772	0.483240465	18.06086468	0.79	0.8	0.002	0.16	0.18	0.15	0.92	0.853	0.002024	0.0016	0.135	0.009	0.03	0.021358394	0.034176891	0.07678834	0.414063985	0.661305564	0.361875739	15.43354375	0.085119516	44.03578869	2.280360809	0.980988842	0.5	0.5	0.740521923	22.60580581	2	1.416499706	292.6883
235	1	0	pop_healthy_1000_anth	68.30979233	0.239562976	40	53.18005442	0.885501276	0.911509107	16.88618849	0.47	1.076918291	0.350452983	0.026653869	11.27896847	1.628463442	0.460886128	12.35331595	0.79	0.8	0.002	0.16	0.18	0.15	0.92	0.853	0.002024	0.0016	0.135	0.009	0.03	0.02231273	0.03400983	0.082890595	0.341266651	0.672619063	0.209146615	15.20805353	0.138975048	44.464552	2.146582919	1.115832358	0.5	0.5	1.032915947	20.85047748	2	1.078914484	292.6883
236	1	0	pop_healthy_1000_anth	66.88581196	0.236168062	40	56.37674982	1.003852051	1.182049425	16.82892669	0.47	0.680474565	0.51717312	0.0305422	10.8799254	1.526958584	0.493118012	10.78666552	0.79	0.8	0.002	0.16	0.18	0.15	0.92	0.853	0.002024	0.0016	0.135	0.009	0.03	0.021855904	0.033239219	0.07762225	0.410935332	0.611306267	0.427116612	15.17127508	0.169261092	44.09227579	1.984314814	0.532453282	0.5	0.5	1.269268772	10.22175007	2	1.036108843	292.6883
237	1	0	pop_healthy_1000_anth	75.46391525	0.22980284	40	32.75671619	1.47335704	1.216647581	18.12140934	0.47	0.968726774	0.487042748	0.027988076	12.64477279	1.636468639	0.494431509	13.41535012	0.79	0.8	0.002	0.16	0.18	0.15	0.92	0.853	0.002024	0.0016	0.135	0.009	0.03	0.0204634	0.039887043	0.083075507	0.388534838	0.611224244	0.32911688	14.78149956	0.065847014	43.9539544	2.763897166	1.013588638	0.5	0.5	0.581473569	13.49025474	2	0.890174202	292.6883
238	1	0	pop_healthy_1000_anth	69.51303123	0.215638441	40	27.23873191	0.872379272	0.952228752	17.95436386	0.460795773	0.903048774	0.399216474	0.028084005	12.17466654	1.641692795	0.53520595	8.115677871	0.777275156	0.787114082	0.001967785	0.171045072	0.195463101	0.162885918	0.905181195	0.83926039	0.001991399	0.001574228	0.146597326	0.009773155	0.032577184	0.023113489	0.034855936	0.094905813	0.360573433	0.686678853	0.411286551	15.2372482	0.132743596	44.63128652	3.013393251	3.765115053	0.495292958	0.495292958	1.796457335	7.547007964	1.981168152	1.53613009	292.6883
239	1	0	pop_healthy_1000_anth	74.35586494	0.244588387	40	57.87757546	1.116915319	0.960334816	17.43571246	0.47	1.32472468	0.331026861	0.02847675	10.72101416	1.583576164	0.472318117	19.963358	0.79	0.8	0.002	0.16	0.18	0.15	0.92	0.853	0.002024	0.0016	0.135	0.009	0.03	0.022279411	0.030368569	0.07830506	0.419104403	0.660003849	0.326034861	15.22485328	0.113494221	44.50930522	2.088793211	1.353129405	0.5	0.5	1.412635747	8.541622166	2	1.055632912	292.6883
240	1	0	pop_healthy_1000_anth	73.32357587	0.243231664	40	38.28880339	0.865120228	1.06756866	17.36248017	0.47	0.98050289	0.51480498	0.029854058	11.34835087	1.505436053	0.487365538	15.54958886	0.79	0.8	0.002	0.16	0.18	0.15	0.92	0.853	0.002024	0.0016	0.135	0.009	0.03	0.022372137	0.0393214	0.077688578	0.31488649	0.645026974	0.476207231	15.07648471	0.119012592	43.76625031	2.788227029	1.103250589	0.5	0.5	0.377295272	24.14860761	2	0.829176005	292.6883
241	1	0	pop_healthy_1000_anth	85.17407725	0.239945649	40	35.13597375	0.761842528	1.039388305	18.84071061	0.47	1.123390725	0.458975461	0.026065906	13.83530279	1.592359312	0.520717494	15.6549258	0.79	0.8	0.002	0.16	0.18	0.15	0.92	0.853	0.002024	0.0016	0.135	0.009	0.03	0.023091358	0.041831134	0.080813329	0.558551993	0.634718211	0.69644532	15.14020284	0.109496861	44.40357756	3.093684609	1.339853992	0.5	0.5	0.472956376	16.28906046	2	0.98266499	292.6883
242	1	0	pop_healthy_1000_anth	63.43848105	0.219374066	40	55.54126104	0.854363582	0.813395051	17.00527838	0.47	0.581243018	0.309298139	0.02924739	10.32017767	1.443640741	0.443298743	11.90205821	0.79	0.8	0.002	0.16	0.18	0.15	0.92	0.853	0.002024	0.0016	0.135	0.009	0.03	0.023255967	0.03469542	0.082036386	0.484031504	0.70012378	0.331977723	15.38324274	0.130316462	45.7770374	2.108998342	0.708748366	0.5	0.5	0.782592013	18.57070854	2	1.124127948	292.6883
243	1	0	pop_healthy_1000_anth	75.94718215	0.226437504	40	46.21996205	0.808253413	1.122660238	18.31393433	0.47	0.837286186	0.357135849	0.025501354	12.7150339	1.523821244	0.499252595	14.11337503	0.79	0.8	0.002	0.16	0.18	0.15	0.92	0.853	0.002024	0.0016	0.135	0.009	0.03	0.020879396	0.037281334	0.080931084	0.352466152	0.628477008	0.456298652	14.76485116	0.132038847	44.84307268	2.3874934	1.389913821	0.5	0.5	1.28929706	13.60945997	2	0.813710049	292.6883
244	1	0	pop_healthy_1000_anth	49.3983815	0.201239096	40	23.91389419	0.863754303	0.884569004	15.66751721	0.449712981	0.856285466	0.380239835	0.03039257	8.908481516	1.421345532	0.504486853	6.36028734	0.761953196	0.771598173	0.001928995	0.184344423	0.214082193	0.178401827	0.887337899	0.822716552	0.001952143	0.001543196	0.160561644	0.01070411	0.035680365	0.025919151	0.027962446	0.123764774	0.426933694	0.683884126	0.352588821	15.02364939	0.045742225	45.04895352	3.190304769	1.298684062	0.489625218	0.489625218	3.69366077	19.50334102	1.958492758	1.076109725	292.6883
245	1	0	pop_healthy_1000_anth	69.31108993	0.222609461	40	28.97767984	1.083726725	0.848884666	17.64532067	0.466592266	0.994232758	0.407361468	0.027996275	11.83794759	1.517067314	0.494528655	11.85052608	0.785288808	0.795229173	0.001988073	0.164089281	0.185724993	0.154770827	0.914513548	0.847913105	0.00201193	0.001590458	0.139293745	0.00928625	0.030954165	0.022897477	0.035106291	0.076727485	0.382393378	0.686710966	0.480018097	14.78870374	0.119331493	45.49970628	2.817016876	0.759015093	0.498257285	0.498257285	1.407726252	29.5626243	1.993027776	1.663057339	292.6883
246	1	0	pop_healthy_1000_anth	71.64359718	0.234109626	40	57.74145782	0.895944039	1.027838969	17.49359451	0.47	0.719809975	0.252854164	0.029988459	11.84751703	1.562113556	0.428831679	14.44698913	0.79	0.8	0.002	0.16	0.18	0.15	0.92	0.853	0.002024	0.0016	0.135	0.009	0.03	0.020783169	0.033873125	0.076001369	0.578320652	0.652965031	0.459144909	15.14795787	0.130723915	43.59545791	1.888181723	1.258771464	0.5	0.5	0.589980264	8.455376567	2	1.284088276	292.6883
247	1	0	pop_healthy_1000_anth	64.47513585	0.225082692	40	37.93232311	1.132544468	1.10950293	16.92485991	0.47	0.908325806	0.423273574	0.025951404	10.52858809	1.42253268	0.489846911	11.19723041	0.79	0.8	0.002	0.16	0.18	0.15	0.92	0.853	0.002024	0.0016	0.135	0.009	0.03	0.021896168	0.037286494	0.086210634	0.369291998	0.639271274	0.611010499	15.19003237	0.111224917	44.1768653	2.772048347	0.637993451	0.5	0.5	2.944881727	16.53686026	2	1.292853605	292.6883
248	1	0	pop_healthy_1000_anth	68.03518251	0.229616658	40	37.18516656	0.894082483	1.408612081	17.21333741	0.47	0.913780823	0.43944837	0.026308664	11.08486645	1.522206474	0.485008468	11.66291079	0.79	0.8	0.002	0.16	0.18	0.15	0.92	0.853	0.002024	0.0016	0.135	0.009	0.03	0.020844639	0.038233156	0.074287399	0.514925453	0.616254544	0.418076659	15.03136852	0.134398514	45.49103285	2.702244828	1.668536184	0.5	0.5	0.543380154	23.65779601	2	1.053421048	292.6883
249	1	0	pop_healthy_1000_anth	88.85507277	0.246079774	40	38.59641372	1.042207452	1.18780397	19.00216801	0.47	0.965354874	0.324115678	0.028559593	13.205497	1.593524559	0.508680662	23.69648861	0.79	0.8	0.002	0.16	0.18	0.15	0.92	0.853	0.002024	0.0016	0.135	0.009	0.03	0.021197575	0.039556957	0.074104573	0.474244903	0.637004133	0.486360653	14.50357793	0.108464505	44.46808266	2.905213195	1.241491496	0.5	0.5	0.563294993	9.526572599	2	1.064085484	292.6883
250	1	0	pop_healthy_1000_anth	87.09584492	0.249558993	40	34.80760789	1.12335341	1.095057807	18.68151555	0.47	1.145790044	0.475592413	0.025903153	13.64215718	1.621221735	0.479337248	17.16456678	0.79	0.8	0.002	0.16	0.18	0.15	0.92	0.853	0.002024	0.0016	0.135	0.009	0.03	0.020866716	0.036659465	0.076794134	0.470737867	0.656224775	0.336168831	15.43742921	0.142016126	44.89197127	2.96332657	0.678051	0.5	0.5	0.774448619	12.40460819	2	0.737072257	292.6883
251	1	0	pop_healthy_1000_anth	62.37738987	0.221230705	40	27.55588893	0.800415089	1.091904158	16.79155426	0.461852963	0.897981289	0.372356509	0.029600312	10.6770009	1.397460578	0.535248681	10.33193704	0.778736721	0.788594148	0.001971485	0.169776444	0.193687022	0.161405852	0.906883271	0.840838511	0.001995143	0.001577188	0.145265266	0.009684351	0.03228117	0.025078288	0.037561003	0.09511707	0.388371941	0.624782325	0.519245203	14.30369459	0.150608257	43.65301447	3.196916543	1.971933045	0.495833605	0.495833605	0.739654648	8.22025419	1.983331163	0.868970282	292.6883
252	1	0	pop_healthy_1000_anth	65.9693177	0.219088484	40	37.96164748	0.856189504	0.909493642	17.35246674	0.47	1.005622367	0.441456352	0.0275063	12.18131441	1.42007971	0.47968263	12.01273113	0.79	0.8	0.002	0.16	0.18	0.15	0.92	0.853	0.002024	0.0016	0.135	0.009	0.03	0.020831985	0.038303665	0.078089745	0.455682967	0.639505641	0.242861842	15.32007316	0.117274422	42.93059555	2.453203686	0.966274847	0.5	0.5	3.102441881	30.92905371	2	0.819483331	292.6883
253	1	0	pop_healthy_1000_anth	73.94807844	0.231953051	40	43.95906036	0.87774031	0.783741168	17.85514586	0.47	0.828207808	0.500452701	0.025199194	11.74482392	1.487434726	0.502883908	12.27840864	0.79	0.8	0.002	0.16	0.18	0.15	0.92	0.853	0.002024	0.0016	0.135	0.009	0.03	0.02177813	0.039575215	0.076355937	0.533265224	0.645938914	0.465505403	14.92667797	0.148557599	42.88115566	2.618248543	0.90381369	0.5	0.5	1.821792914	14.75538478	2	0.684695479	292.6883
254	1	0	pop_healthy_1000_anth	61.74734405	0.21850336	40	30.02891552	0.892907073	1.054669002	16.81047873	0.47	0.928228836	0.379913651	0.028140865	10.69264451	1.606988133	0.522077999	7.192811768	0.79	0.8	0.002	0.16	0.18	0.15	0.92	0.853	0.002024	0.0016	0.135	0.009	0.03	0.02258267	0.040240868	0.080913076	0.453386937	0.633778751	0.563191271	15.17689955	0.088536621	45.04165379	3.171360985	0.339723197	0.5	0.5	0.693366289	26.78005042	2	1.004040759	292.6883
255	1	0	pop_healthy_1000_anth	75.24135782	0.21791934	40	39.10297322	0.615216351	1.240451256	18.58148522	0.47	1.061257351	0.459606637	0.027920314	13.11234797	1.35011009	0.520546729	18.14503817	0.79	0.8	0.002	0.16	0.18	0.15	0.92	0.853	0.002024	0.0016	0.135	0.009	0.03	0.023436107	0.038985366	0.080552292	0.609178822	0.682305004	0.420255646	15.2023988	0.03183143	44.8976158	3.080914481	1.256691794	0.5	0.5	0.746647211	17.55154567	2	1.07136054	292.6883
256	1	0	pop_healthy_1000_anth	74.69569059	0.241591353	40	42.43442859	0.940726331	1.190753944	17.58357104	0.47	0.67903014	0.409850327	0.027837382	11.96799153	1.593676353	0.444569839	18.23629634	0.79	0.8	0.002	0.16	0.18	0.15	0.92	0.853	0.002024	0.0016	0.135	0.009	0.03	0.022088351	0.04043061	0.073122249	0.431647548	0.599498184	0.829239344	14.89085072	0.121221242	44.37709697	2.698511848	0.62893268	0.5	0.5	1.120402523	17.29699183	2	1.07529382	292.6883
257	1	0	pop_healthy_1000_anth	78.93177833	0.238090776	40	38.35609448	1.173776957	0.79183569	18.20768197	0.47	1.091009393	0.548029934	0.026030517	12.92734718	1.473062733	0.495853884	13.17600066	0.79	0.8	0.002	0.16	0.18	0.15	0.92	0.853	0.002024	0.0016	0.135	0.009	0.03	0.023198258	0.042283622	0.083505453	0.517304532	0.63235802	0.475756814	15.34549094	0.098270982	44.8771006	2.889865976	1.004618426	0.5	0.5	0.521938064	13.36371787	2	1.039121754	292.6883
258	1	0	pop_healthy_1000_anth	74.77491241	0.249730292	40	49.40081123	0.847295901	0.93608761	17.30383416	0.47	0.694850999	0.382909001	0.027247352	10.79037187	1.48061604	0.509559155	18.31678217	0.79	0.8	0.002	0.16	0.18	0.15	0.92	0.853	0.002024	0.0016	0.135	0.009	0.03	0.02228759	0.034591178	0.083751814	0.384603422	0.663391065	0.211767476	14.86513686	0.119946676	42.36381502	2.508185958	1.052710946	0.5	0.5	1.284596013	7.992686688	2	0.865398565	292.6883
259	1	0	pop_healthy_1000_anth	84.40405011	0.220216264	40	58.03247936	1.304028013	1.227000691	19.57748718	0.47	0.787968949	0.648487841	0.029021928	13.95720949	1.446109688	0.461492293	13.1767664	0.79	0.8	0.002	0.16	0.18	0.15	0.92	0.853	0.002024	0.0016	0.135	0.009	0.03	0.021183526	0.034960323	0.085057354	0.539923744	0.610923808	0.695755529	15.03887722	0.10278322	45.81488482	1.996334856	0.862141873	0.5	0.5	1.268913744	9.413846303	2	1.352557493	292.6883
260	1	0	pop_healthy_1000_anth	52.82939871	0.198800459	40	24.41819668	1.424441177	1.068202578	16.30155907	0.451393989	0.794089981	0.389554341	0.030253678	9.540909917	1.360518364	0.533982062	5.42808046	0.76427719	0.773951585	0.001934879	0.182327213	0.211258099	0.176048415	0.890044322	0.825225877	0.001958098	0.001547903	0.158443574	0.010562905	0.035209683	0.023634101	0.029630662	0.113682449	0.294159346	0.753097529	0.308088356	14.92906314	0.124915292	45.34993285	3.488404399	1.12071453	0.490484886	0.490484886	0.6077521	12.16362076	1.961932101	0.576658032	292.6883
261	1	0	pop_healthy_1000_anth	76.92430161	0.222153606	40	50.92447366	1.439499267	0.94302736	18.60823138	0.47	1.068165533	0.521741319	0.028727378	13.2356566	1.318933927	0.491820576	12.0338942	0.79	0.8	0.002	0.16	0.18	0.15	0.92	0.853	0.002024	0.0016	0.135	0.009	0.03	0.022452477	0.038005028	0.083518578	0.41729873	0.617323264	0.561075258	15.02681777	0.11520572	44.52243588	2.509959599	1.167898198	0.5	0.5	1.717442567	14.01200768	2	1.210464105	292.6883
262	1	0	pop_healthy_1000_anth	67.42122562	0.235404569	40	50.8969786	1.165838446	0.764429695	16.92352696	0.47	1.139846826	0.458642147	0.025634453	11.31866572	1.497330761	0.511714287	11.02168857	0.79	0.8	0.002	0.16	0.18	0.15	0.92	0.853	0.002024	0.0016	0.135	0.009	0.03	0.022071823	0.030653424	0.080171491	0.441554711	0.645587385	0.451121471	15.31906699	0.089450427	43.34528764	2.511113607	1.759394091	0.5	0.5	1.591440814	7.534318895	2	1.188289913	292.6883
263	1	0	pop_healthy_1000_anth	63.19811525	0.224037347	40	53.97326275	1.188202415	0.844195322	16.79545807	0.47	1.139759853	0.381743112	0.027336748	10.69783654	1.487469233	0.468570801	8.654148382	0.79	0.8	0.002	0.16	0.18	0.15	0.92	0.853	0.002024	0.0016	0.135	0.009	0.03	0.019374796	0.038741978	0.082744055	0.485349564	0.583357844	0.375484057	15.43272723	0.080193114	45.28845899	2.500169496	0.575699086	0.5	0.5	0.828118442	28.88573043	2	1.153517448	292.6883
264	1	0	pop_healthy_1000_anth	54.95224843	0.209247599	40	21.431932	1.163609351	1.206156649	16.20550211	0.441439773	0.853361783	0.374985794	0.032289978	9.094318567	1.542716888	0.547399902	6.599547246	0.750515487	0.760015683	0.001900039	0.194272272	0.227981181	0.189984317	0.874018035	0.810366722	0.00192284	0.001520031	0.170985886	0.011399059	0.037996863	0.025656181	0.028450208	0.136128567	0.335071695	0.76752472	0.222131343	14.74473779	0.129721915	43.52247043	3.26659554	1.182679294	0.4853943	0.4853943	1.585299925	6.423515154	1.941565776	1.340532301	292.6883
265	1	0	pop_healthy_1000_anth	52.0109197	0.193994691	40	20.14100272	0.709080171	1.006596803	16.37390794	0.437136676	0.811247412	0.350856742	0.031096142	9.285923049	1.465435738	0.514072987	8.223630628	0.744566454	0.753991346	0.001884978	0.199435989	0.235210385	0.196008654	0.867090048	0.803943273	0.001907598	0.001507983	0.176407789	0.011760519	0.039201731	0.029989901	0.027077095	0.146129035	0.198890993	0.804741475	0.200086431	15.02157866	0.129670193	44.78080159	3.344362314	2.078711627	0.483193696	0.483193696	2.721076135	5.475776218	1.932761639	1.095871557	292.6883
266	1	0	pop_healthy_1000_anth	58.49955028	0.223032282	40	28.61411438	1.143923505	0.998494567	16.1954269	0.465380381	0.917519498	0.377556483	0.028956325	9.748635345	1.408331372	0.486447574	11.33221901	0.783613377	0.793532534	0.001983831	0.165543542	0.187760959	0.156467466	0.912562414	0.846104064	0.002007637	0.001587065	0.14082072	0.009388048	0.031293493	0.023294358	0.033671627	0.082505841	0.356347462	0.628066587	0.419508632	14.91197324	0.137558517	44.71709165	2.947282773	1.577787345	0.497637527	0.497637527	0.391270914	7.787042508	1.99054826	0.866539281	292.6883
267	1	0	pop_healthy_1000_anth	75.46760411	0.238729376	40	33.92131575	0.940762197	1.125929011	17.77981958	0.47	0.99720261	0.454414358	0.032169984	12.56514761	1.396338892	0.502915371	9.917215507	0.79	0.8	0.002	0.16	0.18	0.15	0.92	0.853	0.002024	0.0016	0.135	0.009	0.03	0.022917698	0.041757599	0.083005978	0.300670825	0.60298112	0.29762707	14.83747303	0.107895175	44.13179236	3.177809751	0.818642207	0.5	0.5	0.560920581	26.49019911	2	0.653257438	292.6883
268	1	0	pop_healthy_1000_anth	50.02933233	0.204911783	40	55.93120191	1.483293413	1.015425581	15.62531882	0.47	0.922587096	0.556114466	0.026836979	9.597992616	1.487825266	0.487661204	6.312742351	0.79	0.8	0.002	0.16	0.18	0.15	0.92	0.853	0.002024	0.0016	0.135	0.009	0.03	0.022418506	0.03167624	0.079184425	0.338740328	0.648586875	0.434195527	15.3645823	0.115532919	44.49333854	2.090154033	1.76626836	0.5	0.5	0.751675192	15.29561498	2	0.662087813	292.6883
269	1	0	pop_healthy_1000_anth	73.1546906	0.231323663	40	31.78533506	1.200511388	1.207836023	17.78324691	0.47	1.103616933	0.481618947	0.025855584	12.48254192	1.501746686	0.524266434	15.37428985	0.79	0.8	0.002	0.16	0.18	0.15	0.92	0.853	0.002024	0.0016	0.135	0.009	0.03	0.021146534	0.042340535	0.085237251	0.319515599	0.669402975	0.688033661	14.76886492	0.113059775	42.7661631	2.613052288	0.698621385	0.5	0.5	0.908770225	6.502402704	2	0.64488852	292.6883
270	1	0	pop_healthy_1000_anth	58.64188063	0.213433207	40	49.04618326	0.994935617	1.101071489	16.5757409	0.47	0.748411797	0.419862256	0.02923773	10.85217569	1.514553412	0.476072819	7.358935544	0.79	0.8	0.002	0.16	0.18	0.15	0.92	0.853	0.002024	0.0016	0.135	0.009	0.03	0.020420398	0.035121324	0.081269392	0.240716146	0.622706019	0.470534868	15.2870958	0.065107773	44.52381273	2.325424511	0.390958939	0.5	0.5	2.45406017	11.20928882	2	1.084780019	292.6883
271	1	0	pop_healthy_1000_anth	62.47896636	0.228111507	40	47.5584324	0.701490662	0.789120712	16.54982177	0.47	0.95888485	0.448607229	0.026229389	9.276137017	1.502230523	0.508552106	9.775026789	0.79	0.8	0.002	0.16	0.18	0.15	0.92	0.853	0.002024	0.0016	0.135	0.009	0.03	0.020876954	0.035165601	0.084153056	0.48197647	0.698491345	0.419939377	15.22730129	0.040416365	44.71672571	2.338841463	0.941431512	0.5	0.5	0.752720826	14.50330988	2	0.726714214	292.6883
272	1	0	pop_healthy_1000_anth	68.83143129	0.222002611	40	29.66355606	0.758648592	0.895798112	17.60817555	0.46887852	0.999538115	0.440463576	0.026234148	11.83346795	1.481444844	0.468278358	8.00265093	0.788449554	0.798429928	0.001996075	0.161345776	0.181884086	0.151570072	0.918194417	0.851325911	0.002020028	0.00159686	0.136413065	0.009094204	0.030314014	0.021716209	0.042450626	0.083620022	0.296942946	0.60212966	0.490699293	15.04993011	0.076530434	43.89536318	3.169661115	0.96428557	0.499426475	0.499426475	0.542133048	25.5028344	1.997705452	0.529124034	292.6883
273	1	0	pop_healthy_1000_anth	63.00681665	0.219854104	40	28.37148765	1.260921192	0.779344158	16.92881195	0.464571626	0.891506963	0.396218513	0.027138155	10.62914071	1.554380617	0.548421884	10.88332867	0.782495272	0.792400276	0.001981001	0.166514049	0.189119669	0.157599724	0.911260317	0.844896794	0.002004773	0.001584801	0.141839752	0.009455983	0.031519945	0.022871919	0.03805962	0.085865202	0.440821681	0.680628578	0.277298509	15.14150882	0.135147504	43.21225438	2.930487169	5.010101996	0.497223929	0.497223929	2.228978624	26.24240882	1.988893546	0.855207367	292.6883
274	1	0	pop_healthy_1000_anth	64.71422173	0.202156473	40	23.75227206	0.953868494	0.966797342	17.89188263	0.44917424	0.926047275	0.373630307	0.030071921	11.43434694	1.424751364	0.557445468	5.889600482	0.761208387	0.770843936	0.00192711	0.184990912	0.214987276	0.179156064	0.886470527	0.821912347	0.001950235	0.001541688	0.161240457	0.010749364	0.035831213	0.024156025	0.030767225	0.111776404	0.500503374	0.698142428	0.46972804	14.89261583	0.095584192	43.55136418	3.636466241	1.708211605	0.489349706	0.489349706	1.248239835	17.57667942	1.957390495	0.849869623	292.6883
275	1	0	pop_healthy_1000_anth	55.5486776	0.215597112	40	28.35496216	0.90343603	1.19378677	16.0514915	0.464516541	0.883171334	0.399283932	0.029257999	9.822485565	1.534423095	0.53612629	7.744423387	0.782419117	0.792323157	0.001980808	0.166580151	0.189212212	0.157676843	0.91117163	0.844814566	0.002004578	0.001584646	0.141909159	0.009460611	0.031535369	0.021533399	0.037292064	0.084080751	0.371146577	0.667030143	0.369521574	14.53809981	0.084382666	45.19259154	3.028017606	0.809754171	0.497195759	0.497195759	0.533650973	13.95236119	1.988780842	0.487795901	292.6883
276	1	0	pop_healthy_1000_anth	60.33987489	0.205148751	40	59.41501362	0.985527989	0.810593357	17.15014372	0.47	1.10376921	0.280397108	0.026802796	10.80066422	1.500017017	0.466983806	6.743220272	0.79	0.8	0.002	0.16	0.18	0.15	0.92	0.853	0.002024	0.0016	0.135	0.009	0.03	0.020962941	0.03255797	0.081981378	0.35457998	0.647654876	0.515271895	14.47541572	0.140294426	44.02805998	2.10257988	0.993293492	0.5	0.5	1.391234836	15.5267033	2	0.883206917	292.6883
277	1	0	pop_healthy_1000_anth	47.88082823	0.205959678	40	20.49541198	0.923085819	1.1393289	15.24718694	0.43831804	0.790678727	0.345892248	0.034254148	8.0308362	1.532181763	0.552383364	7.29880543	0.74619969	0.755645256	0.001889113	0.198018352	0.233225693	0.194354744	0.868992044	0.805706754	0.001911782	0.001511291	0.17491927	0.011661285	0.038870949	0.02809281	0.023552698	0.142844263	0.167761984	0.766063924	0.29989864	15.28352802	0.134737413	44.8215563	3.258044863	0.895135054	0.483797846	0.483797846	0.544334714	11.8464087	1.93517871	1.342726676	292.6883
278	1	0	pop_healthy_1000_anth	73.09059119	0.249772852	40	47.82616022	0.773664847	1.089295225	17.10638023	0.47	0.684010879	0.474860043	0.023396068	11.63782415	1.436263869	0.518619206	13.78454191	0.79	0.8	0.002	0.16	0.18	0.15	0.92	0.853	0.002024	0.0016	0.135	0.009	0.03	0.02105543	0.033300779	0.075788851	0.328102556	0.667835147	0.458427546	15.16949536	0.141170848	43.3111009	2.605225411	2.242823483	0.5	0.5	1.116959419	39.15728274	2	1.003224193	292.6883
279	1	0	pop_healthy_1000_anth	54.53959496	0.23463376	40	23.19643989	1.05239179	1.098333058	15.2461681	0.447321466	0.862361937	0.334491996	0.034406047	8.314288317	1.524087508	0.554153852	11.48374056	0.758646927	0.768250053	0.001920625	0.18721424	0.218099937	0.181749947	0.883487561	0.819146619	0.001943673	0.0015365	0.163574952	0.010904997	0.036349989	0.025628945	0.029208779	0.12002379	0.390321148	0.685001267	0.406025077	15.07626092	0.133877916	43.48640774	3.519154824	0.827517191	0.488402198	0.488402198	2.334026388	18.67645618	1.95359972	1.288220061	292.6883
280	1	0	pop_healthy_1000_anth	68.41892991	0.213244862	40	50.96126701	0.826382264	0.946663665	17.91219673	0.47	0.754053408	0.447885808	0.027577821	11.89566563	1.517327079	0.456711755	11.08909527	0.79	0.8	0.002	0.16	0.18	0.15	0.92	0.853	0.002024	0.0016	0.135	0.009	0.03	0.022666548	0.037469616	0.081814283	0.139116848	0.670831673	0.578463519	15.1233938	0.15101688	44.32531048	2.330663022	1.296095873	0.5	0.5	0.916326131	16.1390782	2	0.898958773	292.6883
281	1	0	pop_healthy_1000_anth	61.33665435	0.216661544	40	28.23285118	1.15907627	1.181570268	16.8255444	0.464109504	0.877168547	0.38670654	0.029551982	10.60587885	1.553148525	0.524009504	8.709142174	0.781856389	0.791753306	0.001979383	0.167068595	0.189896033	0.158246694	0.910516301	0.844206962	0.002003136	0.001583507	0.142422025	0.009494802	0.031649339	0.023777281	0.038424727	0.091087185	0.232063153	0.588378468	0.338854318	14.76369903	0.154964887	43.74452661	3.342444594	2.217813087	0.4969876	0.4969876	1.915944782	25.72470337	1.987948045	0.854893767	292.6883
282	1	0	pop_healthy_1000_anth	79.07633875	0.244640051	40	46.57880235	0.792741024	0.910169999	17.97875016	0.47	1.14715923	0.44199193	0.026730574	12.08069403	1.487961273	0.514686279	18.08905807	0.79	0.8	0.002	0.16	0.18	0.15	0.92	0.853	0.002024	0.0016	0.135	0.009	0.03	0.023095416	0.035448322	0.079721814	0.357304693	0.597607994	0.471992453	15.0015637	0.110064828	43.56715153	2.811380102	0.507257487	0.5	0.5	0.861234321	15.62151951	2	0.785121245	292.6883
283	1	0	pop_healthy_1000_anth	57.19446801	0.223139963	40	21.56695018	0.911052013	0.821067988	16.00988947	0.441889834	0.89053932	0.35861	0.031003117	9.028965138	1.499865079	0.536135486	8.025518811	0.751137695	0.760645767	0.001901614	0.193732199	0.227225079	0.189354233	0.874742633	0.81103855	0.001924434	0.001521292	0.170418809	0.011361254	0.037870847	0.028799438	0.027297664	0.125506244	0.25344971	0.77018518	0.414586416	14.85601273	0.138536447	45.31881281	3.533559899	0.614482729	0.485624461	0.485624461	1.450762954	19.33722282	1.9424866	0.804586392	292.6883
284	1	0	pop_healthy_1000_anth	73.07099131	0.248248959	40	37.62864654	0.768764779	0.957354981	17.15650345	0.47	0.976994628	0.456813622	0.027910817	10.74100411	1.463812611	0.46926363	19.25802082	0.79	0.8	0.002	0.16	0.18	0.15	0.92	0.853	0.002024	0.0016	0.135	0.009	0.03	0.020565364	0.039898615	0.082670007	0.445924051	0.608628949	0.617503127	15.07951053	0.128916728	45.13967741	2.924736398	1.020802472	0.5	0.5	0.950851795	18.82368969	2	0.898824889	292.6883
285	1	0	pop_healthy_1000_anth	59.82509162	0.209345339	40	28.59398805	1.371581111	1.092669223	16.90480006	0.465313294	0.968580188	0.391154072	0.03066499	10.76360288	1.626472806	0.499937721	8.469132821	0.783520628	0.793438611	0.001983597	0.165624048	0.187873667	0.156561389	0.912454403	0.846003919	0.0020074	0.001586877	0.14090525	0.009393683	0.031312278	0.022649177	0.036965041	0.091915651	0.526494208	0.596461954	0.523273742	15.23828085	0.137726997	45.82163888	2.842579977	0.456569008	0.497603218	0.497603218	0.871181946	13.2805914	1.990410999	1.125125535	292.6883
286	1	0	pop_healthy_1000_anth	69.92833607	0.228219168	40	26.58656793	1.188786601	1.143631727	17.50453339	0.458621893	0.902712436	0.386293513	0.030055016	11.24213713	1.55940361	0.578952516	13.81534702	0.774269767	0.78407065	0.001960177	0.173653728	0.19911522	0.16592935	0.901681248	0.836015331	0.001983699	0.001568141	0.149336415	0.009955761	0.03318587	0.025077549	0.035160661	0.107386643	0.352327843	0.651500509	0.450785332	15.16027061	0.103855219	41.82581061	3.032762786	1.312238199	0.494181236	0.494181236	0.948375567	14.78039459	1.976720393	0.926574931	292.6883
287	1	0	pop_healthy_1000_anth	64.23117556	0.208589435	40	50.58849889	0.987098471	0.712865557	17.54796587	0.47	1.089543396	0.364625516	0.027149344	11.18806193	1.60084266	0.470648671	7.980231939	0.79	0.8	0.002	0.16	0.18	0.15	0.92	0.853	0.002024	0.0016	0.135	0.009	0.03	0.02193114	0.03351838	0.083977093	0.382932539	0.622225584	0.701634586	14.3654089	0.141099753	42.43267065	2.395061243	0.593949307	0.5	0.5	0.679828277	9.579464402	2	1.056525159	292.6883
288	1	0	pop_healthy_1000_anth	77.68779121	0.240246017	40	48.10125108	1.114349463	0.832029233	17.98242629	0.47	0.779425978	0.641396587	0.02895677	12.03205317	1.376564494	0.455646804	19.7582572	0.79	0.8	0.002	0.16	0.18	0.15	0.92	0.853	0.002024	0.0016	0.135	0.009	0.03	0.022785615	0.035337641	0.088783849	0.379419528	0.67466581	0.469789982	15.07380355	0.102432835	45.92401173	2.449903248	1.203388565	0.5	0.5	0.810064204	14.85689414	2	0.80255337	292.6883
289	1	0	pop_healthy_1000_anth	59.59544042	0.2000806	40	50.3772803	1.194878297	0.807617327	17.25853894	0.47	1.04612436	0.399986655	0.028841199	10.72473125	1.5129026	0.506908848	6.930759507	0.79	0.8	0.002	0.16	0.18	0.15	0.92	0.853	0.002024	0.0016	0.135	0.009	0.03	0.021873504	0.034848229	0.075701262	0.496324103	0.627543991	0.456189	14.64444047	0.131749027	44.1537156	2.227398588	0.69176611	0.5	0.5	0.583082146	34.96219282	2	1.12541327	292.6883
290	1	0	pop_healthy_1000_anth	61.19092875	0.214483594	40	24.85320168	1.095599261	1.158402967	16.89065467	0.452844006	0.866988149	0.354804753	0.03271897	10.54875785	1.604461522	0.493262431	9.464779676	0.766281838	0.775981608	0.001939954	0.180587193	0.208822071	0.174018392	0.892378849	0.827390389	0.001963233	0.001551963	0.156616553	0.010441104	0.034803678	0.026092116	0.031269765	0.11567962	0.332444803	0.668517025	0.495798902	14.91543325	0.116992846	45.23103851	3.499411865	0.548930965	0.491226424	0.491226424	2.202029946	9.19092555	1.964898835	1.246228335	292.6883
291	1	0	pop_healthy_1000_anth	66.8574153	0.214587131	40	30.65837229	1.011291182	1.113259803	17.65114792	0.47	0.953467121	0.40727096	0.026907125	11.84946925	1.471090659	0.540917294	9.339827317	0.79	0.8	0.002	0.16	0.18	0.15	0.92	0.853	0.002024	0.0016	0.135	0.009	0.03	0.023061474	0.039825759	0.084260171	0.374594885	0.568863546	0.466438287	15.087169	0.171644607	45.89373852	3.052176019	0.324280711	0.5	0.5	0.681678918	25.42386357	2	0.851413068	292.6883
292	1	0	pop_healthy_1000_anth	70.92045688	0.23058566	40	43.04058862	1.112181991	0.783263462	17.53757796	0.47	1.119040302	0.503667906	0.026879268	11.25973566	1.610816702	0.498072444	15.27927116	0.79	0.8	0.002	0.16	0.18	0.15	0.92	0.853	0.002024	0.0016	0.135	0.009	0.03	0.022051556	0.037698337	0.083213925	0.470444006	0.628941695	0.517704127	14.88037064	0.0976145	42.15199965	2.680279797	0.907281422	0.5	0.5	0.677363457	16.2939749	2	2.222727634	292.6883
293	1	0	pop_healthy_1000_anth	68.4270818	0.20398946	40	45.76915561	1.218100065	1.291365436	18.31513587	0.47	1.266658034	0.526879806	0.031732881	13.34591937	1.504994337	0.491125803	10.59998847	0.79	0.8	0.002	0.16	0.18	0.15	0.92	0.853	0.002024	0.0016	0.135	0.009	0.03	0.021809368	0.039117901	0.082544158	0.337498486	0.637142752	0.325528551	15.3534296	0.124576845	44.04542295	2.789589615	0.633119826	0.5	0.5	0.132633213	18.97962826	2	0.743338785	292.6883
294	1	0	pop_healthy_1000_anth	73.66442635	0.217487837	40	30.7875244	1.155292353	0.821902366	18.40396583	0.47	0.985588957	0.448629329	0.026663038	12.85421498	1.594893046	0.559720561	10.46805048	0.79	0.8	0.002	0.16	0.18	0.15	0.92	0.853	0.002024	0.0016	0.135	0.009	0.03	0.021500119	0.039975094	0.083752737	0.34691787	0.594572166	0.422381676	14.93122859	0.148006235	44.70792115	2.993025007	0.558242497	0.5	0.5	1.351220649	18.86453075	2	1.114299002	292.6883
295	1	0	pop_healthy_1000_anth	70.6640254	0.194532237	40	34.04191945	1.100997682	1.196307475	19.05914424	0.47	1.061814758	0.463113496	0.029680318	13.84635864	1.506133737	0.519819372	11.277175	0.79	0.8	0.002	0.16	0.18	0.15	0.92	0.853	0.002024	0.0016	0.135	0.009	0.03	0.021248023	0.042072858	0.08006994	0.450540755	0.643695667	0.675498838	14.98553787	0.131913006	42.95008438	3.101762914	1.283581405	0.5	0.5	1.688300414	9.552125304	2	0.980918277	292.6883
296	1	0	pop_healthy_1000_anth	78.63958257	0.246508501	40	27.48171337	1.039126945	0.923674721	17.8609539	0.461605711	1.004083215	0.379982284	0.031738612	11.62675562	1.502178535	0.564796098	15.01702176	0.778394896	0.788247996	0.00197062	0.170073147	0.194102405	0.161752004	0.906485195	0.840469425	0.001994267	0.001576496	0.145576804	0.00970512	0.032350401	0.023575396	0.039798235	0.087148014	0.494573796	0.670316884	0.508951856	15.19378565	0.094836802	42.23962568	3.36728881	2.702163321	0.495707161	0.495707161	2.021991981	20.96204404	1.982825285	1.092695884	292.6883
297	1	0	pop_healthy_1000_anth	61.48181588	0.215590375	40	20.39747149	1.060240192	0.865839996	16.88723934	0.437991572	0.856716633	0.374427479	0.033023045	10.01911354	1.505073335	0.520373885	13.640479	0.745748348	0.7551882	0.001887971	0.198410114	0.23377416	0.1948118	0.86846643	0.805219419	0.001910626	0.001510376	0.17533062	0.011688708	0.03896236	0.027507711	0.02408228	0.127740747	0.316818428	0.752664542	0.460739698	14.84116106	0.105258283	44.81417599	3.369252932	1.065338221	0.48363089	0.48363089	1.411973375	16.60821776	1.934510756	1.068978381	292.6883
298	1	0	pop_healthy_1000_anth	72.21159033	0.243753802	40	20.90109738	1.630107255	0.933958363	17.21185803	0.439670325	0.953285735	0.390761017	0.031970432	10.27046694	1.554196715	0.535086385	17.63344596	0.748069224	0.757538454	0.001893846	0.19639561	0.230953855	0.192461546	0.871169223	0.807725377	0.001916572	0.001515077	0.173215391	0.011547693	0.038492309	0.02832042	0.028064638	0.14404793	0.345537361	0.816093143	0.291860407	15.1806049	0.158730601	43.13188643	3.723385086	0.799885752	0.484489404	0.484489404	0.625518077	13.7137146	1.937945484	1.009703913	292.6883
299	1	0	pop_healthy_1000_anth	71.6978367	0.221446927	40	41.64926088	1.100002339	1.252121943	17.9936056	0.47	1.140432476	0.467089784	0.026302443	12.10560913	1.594750089	0.488029167	9.474912969	0.79	0.8	0.002	0.16	0.18	0.15	0.92	0.853	0.002024	0.0016	0.135	0.009	0.03	0.021124384	0.04272846	0.077571591	0.322728399	0.615007056	0.460237846	15.28460157	0.131304188	45.77358141	2.716251423	0.67728305	0.5	0.5	0.971827499	8.7350068	2	0.59193366	292.6883
300	1	0	pop_healthy_1000_anth	64.20996369	0.217833762	40	45.81749614	0.798262262	1.1099348	17.1687476	0.47	0.874313889	0.510872784	0.027928276	10.21339157	1.46483433	0.493732032	9.533213588	0.79	0.8	0.002	0.16	0.18	0.15	0.92	0.853	0.002024	0.0016	0.135	0.009	0.03	0.022771279	0.034969023	0.084128004	0.411538092	0.611458706	0.675335064	15.22862929	0.065831201	43.66066919	2.495161802	0.684089036	0.5	0.5	0.768890158	14.33322807	2	0.639926085	292.6883
301	1	0	pop_healthy_1000_anth	69.36889503	0.235917803	40	22.83295753	1.019246895	1.058924698	17.14754812	0.446109858	0.903759326	0.418670585	0.030954749	10.35180817	1.536851531	0.528921589	18.33342004	0.756971879	0.766553802	0.001916385	0.18866817	0.220135438	0.183446198	0.881536872	0.817337991	0.001939381	0.001533108	0.165101578	0.011006772	0.03668924	0.028775703	0.029936587	0.098040146	0.457957038	0.702431681	0.469793711	14.50162213	0.121878498	44.50711271	3.489971046	1.368244797	0.487782582	0.487782582	1.837944903	13.96817569	1.95112077	0.820471342	292.6883
302	1	0	pop_healthy_1000_anth	59.30153764	0.233467972	40	57.22642505	1.025082656	1.005318671	15.93746785	0.47	0.735288716	0.518569835	0.028312056	9.907050181	1.541439337	0.475849335	12.69978875	0.79	0.8	0.002	0.16	0.18	0.15	0.92	0.853	0.002024	0.0016	0.135	0.009	0.03	0.02137912	0.033308362	0.080502936	0.265568389	0.635119165	0.519414372	15.01492677	0.123648723	44.02544483	2.185247027	0.710753021	0.5	0.5	0.804033395	12.03199161	2	0.771099931	292.6883
303	1	0	pop_healthy_1000_anth	63.36812762	0.231582203	40	54.58805792	1.253758183	1.047837143	16.54180311	0.47	1.079808893	0.348499139	0.026827209	10.87589067	1.443681275	0.507051392	6.486923152	0.79	0.8	0.002	0.16	0.18	0.15	0.92	0.853	0.002024	0.0016	0.135	0.009	0.03	0.022134709	0.038491097	0.074174072	0.277946717	0.651052641	0.362914535	14.97616812	0.131391674	43.28316104	2.334105354	0.702516556	0.5	0.5	1.563277094	17.94213117	2	1.16481291	292.6883
304	1	0	pop_healthy_1000_anth	64.68630937	0.211122275	40	20.66580541	0.889327097	0.739937412	17.50407472	0.438886018	0.914084798	0.386155031	0.032008469	10.57858538	1.595261884	0.551236532	10.19428307	0.74698492	0.756440425	0.001891101	0.197336778	0.23227149	0.193559575	0.869906489	0.806554603	0.001913794	0.001512881	0.174203617	0.011613574	0.038711915	0.027399977	0.024635421	0.136734351	0.312980431	0.788924308	0.32466746	14.86673901	0.113412266	42.6149566	3.501642679	1.027870056	0.48408831	0.48408831	1.295463807	12.57761773	1.936340793	1.106326436	292.6883
305	1	0	pop_healthy_1000_anth	71.53090078	0.243821736	40	34.38256864	0.742217208	1.272863931	17.12815711	0.47	1.013990856	0.409422513	0.028011245	11.15375343	1.51523068	0.495323794	16.78094345	0.79	0.8	0.002	0.16	0.18	0.15	0.92	0.853	0.002024	0.0016	0.135	0.009	0.03	0.023613309	0.038923982	0.078875039	0.494298588	0.614675864	0.489147424	15.16208808	0.119277904	44.54320726	2.855833916	0.87723892	0.5	0.5	1.912366468	15.18013112	2	1.5634088	292.6883
306	1	0	pop_healthy_1000_anth	62.15108727	0.204762194	40	56.60326162	0.841907391	1.0138382	17.42205892	0.47	0.823856335	0.286475227	0.025905591	10.84483656	1.507220183	0.471364481	12.2863862	0.79	0.8	0.002	0.16	0.18	0.15	0.92	0.853	0.002024	0.0016	0.135	0.009	0.03	0.022341985	0.035017563	0.079608299	0.514392167	0.633772844	0.601638884	15.34515044	0.133856551	44.58174342	2.158069433	0.757575033	0.5	0.5	0.879489703	12.82794878	2	0.917905089	292.6883
307	1	0	pop_healthy_1000_anth	80.73317477	0.226185245	40	42.22574209	0.922845405	1.031336291	18.89269357	0.47	0.836823785	0.293788199	0.027936662	13.27813244	1.405928898	0.506437667	17.30761182	0.79	0.8	0.002	0.16	0.18	0.15	0.92	0.853	0.002024	0.0016	0.135	0.009	0.03	0.022406277	0.04303859	0.069260139	0.302850579	0.607471905	0.446545292	15.26445264	0.114801211	45.19755629	2.600056968	1.189726768	0.5	0.5	0.517268806	19.62568522	2	0.613395594	292.6883
308	1	0	pop_healthy_1000_anth	76.85946105	0.241662143	40	28.89813876	0.751738962	1.082042486	17.83381907	0.466327129	0.999907823	0.451410925	0.026006378	11.87036124	1.50676832	0.527949268	16.04755707	0.784922256	0.794857981	0.001987145	0.164407445	0.186170423	0.155142019	0.914086678	0.847517322	0.002010991	0.001589716	0.139627817	0.009308521	0.031028404	0.023438883	0.035855304	0.089188142	0.357678018	0.652928847	0.622084926	15.31985357	0.126999695	43.77961732	3.222210845	1.70993969	0.498121694	0.498121694	1.305787747	23.69841692	1.992485306	1.503084364	292.6883
309	1	0	pop_healthy_1000_anth	66.56811696	0.231508219	40	56.2998613	1.064628163	0.921558854	16.95703547	0.47	0.96312783	0.423991603	0.02661352	11.38561274	1.527901485	0.456299677	12.61680042	0.79	0.8	0.002	0.16	0.18	0.15	0.92	0.853	0.002024	0.0016	0.135	0.009	0.03	0.02066314	0.034486963	0.080421916	0.309112515	0.615114094	0.475796864	14.6290739	0.093920303	46.16704201	2.246721624	0.894105745	0.5	0.5	0.29493376	8.250934227	2	1.45548745	292.6883
310	1	0	pop_healthy_1000_anth	69.73902621	0.229680207	40	32.1923106	0.829623256	0.935322702	17.42513511	0.47	0.941151012	0.426996609	0.02634327	11.66722433	1.485855952	0.473243098	15.71220192	0.79	0.8	0.002	0.16	0.18	0.15	0.92	0.853	0.002024	0.0016	0.135	0.009	0.03	0.021972246	0.040573151	0.090654493	0.328529552	0.647140987	0.257446926	15.1838554	0.127787354	42.66198959	3.211508288	0.333413168	0.5	0.5	1.907939912	16.73060073	2	1.415565036	292.6883
311	1	0	pop_healthy_1000_anth	72.81371848	0.214649201	40	30.75668024	1.047150563	0.882221299	18.41797871	0.47	0.979251852	0.399230553	0.025468882	12.71675674	1.499719434	0.527314753	12.44039045	0.79	0.8	0.002	0.16	0.18	0.15	0.92	0.853	0.002024	0.0016	0.135	0.009	0.03	0.021877886	0.043839657	0.07884992	0.394061949	0.614385781	0.494691611	14.59562146	0.144755637	44.88071725	2.874776536	0.961278362	0.5	0.5	1.07253756	20.14286239	2	1.253072264	292.6883
312	1	0	pop_healthy_1000_anth	65.05632912	0.203183365	40	48.45038888	0.869536256	1.027849101	17.89372268	0.47	1.379010878	0.434411178	0.026909641	11.86856999	1.421659767	0.476079233	8.257534898	0.79	0.8	0.002	0.16	0.18	0.15	0.92	0.853	0.002024	0.0016	0.135	0.009	0.03	0.020958184	0.036601288	0.076339825	0.494470625	0.602842443	0.410180695	15.32640251	0.123357042	43.37498084	2.527077479	0.970409822	0.5	0.5	0.876956364	20.32929207	2	0.833749967	292.6883
313	1	0	pop_healthy_1000_anth	73.41227894	0.222975065	40	22.0528226	0.911050433	0.980595284	18.14496788	0.443509409	0.916401719	0.382525194	0.032335758	11.51935528	1.643132301	0.553876915	22.06223024	0.753376757	0.762913172	0.001907283	0.19178871	0.224504193	0.187086828	0.877350148	0.81345617	0.00193017	0.001525826	0.168378145	0.01122521	0.037417366	0.026983828	0.030648444	0.126521743	0.394499539	0.687101897	0.440145926	14.86454498	0.175727083	43.00740893	3.284274329	0.62573942	0.486452712	0.486452712	1.319921412	6.367794694	1.94580025	1.20467869	292.6883
314	1	0	pop_healthy_1000_anth	65.18042295	0.247159424	40	59.73704791	0.922917282	0.986769742	16.23940077	0.47	0.982011961	0.406500687	0.026480169	10.86637733	1.396953949	0.45927625	14.41462067	0.79	0.8	0.002	0.16	0.18	0.15	0.92	0.853	0.002024	0.0016	0.135	0.009	0.03	0.021997161	0.034506309	0.081668341	0.336549563	0.642738818	0.457685281	15.24152346	0.116590903	43.28396943	2.073645483	1.500495494	0.5	0.5	0.257591254	10.78890241	2	0.934131275	292.6883
315	1	0	pop_healthy_1000_anth	65.60879151	0.221659813	40	32.44856667	0.907263035	1.181658546	17.20432105	0.47	0.940355498	0.38003327	0.027883785	11.03764595	1.548038997	0.530843136	11.18563156	0.79	0.8	0.002	0.16	0.18	0.15	0.92	0.853	0.002024	0.0016	0.135	0.009	0.03	0.021121422	0.041361904	0.08053976	0.490819427	0.618780508	0.402416406	14.91591691	0.094478459	43.72469265	2.984740632	0.800341556	0.5	0.5	1.153246116	10.80163694	2	0.578794914	292.6883
316	1	0	pop_healthy_1000_anth	58.99806325	0.202781453	40	26.92444099	1.151751985	1.081200478	17.057083	0.459748137	0.901022306	0.419299645	0.026417208	10.66674785	1.459341808	0.526771872	10.26521166	0.775826799	0.785647391	0.001964118	0.172302236	0.19722313	0.164352609	0.9034945	0.837696531	0.001987688	0.001571295	0.147917348	0.009861157	0.032870522	0.02262805	0.037807511	0.092646522	0.475186999	0.669664382	0.325297802	15.3745378	0.15888592	46.69749243	3.124143172	2.170466871	0.494757197	0.494757197	0.7382779	20.31383709	1.979024688	0.937527449	292.6883
317	1	0	pop_healthy_1000_anth	73.4382034	0.224299598	40	55.82629969	0.73736127	1.008815538	18.09450779	0.47	0.705407763	0.46258337	0.028855815	12.67988097	1.619749816	0.473139701	8.024709651	0.79	0.8	0.002	0.16	0.18	0.15	0.92	0.853	0.002024	0.0016	0.135	0.009	0.03	0.019901515	0.036136266	0.084151293	0.493046958	0.604126663	0.721069828	14.89185827	0.09233108	43.85312305	2.267050615	0.848457568	0.5	0.5	0.93064332	18.43757667	2	1.626940135	292.6883
318	1	0	pop_healthy_1000_anth	69.71305048	0.235295478	40	55.77748308	1.034303546	1.1766822	17.21274969	0.47	1.088493398	0.449915038	0.027921339	11.72242962	1.371177072	0.500382014	17.31052866	0.79	0.8	0.002	0.16	0.18	0.15	0.92	0.853	0.002024	0.0016	0.135	0.009	0.03	0.020962504	0.035238722	0.078605597	0.510298479	0.618971971	0.580052262	14.7564914	0.116704003	44.48492171	2.214682692	1.557845829	0.5	0.5	1.247920061	13.25234992	2	0.755399944	292.6883
319	1	0	pop_healthy_1000_anth	82.17641409	0.249160803	40	33.67147607	1.095071483	1.357871001	18.160748	0.47	1.070063352	0.470077418	0.02982883	12.7571498	1.548321904	0.505264167	16.12431849	0.79	0.8	0.002	0.16	0.18	0.15	0.92	0.853	0.002024	0.0016	0.135	0.009	0.03	0.021247587	0.043714818	0.078291518	0.336261734	0.634548038	0.473213009	15.14071676	0.100169824	45.0812006	3.068282647	1.711778497	0.5	0.5	0.488642554	10.53029895	2	0.867284252	292.6883
320	1	0	pop_healthy_1000_anth	55.14189077	0.213930746	40	45.90406786	0.626867975	0.853002534	16.05477502	0.47	0.73863807	0.350908273	0.028735042	9.027300553	1.543885999	0.479231964	9.629843484	0.79	0.8	0.002	0.16	0.18	0.15	0.92	0.853	0.002024	0.0016	0.135	0.009	0.03	0.022966145	0.036558586	0.081084072	0.372908128	0.637601467	0.319305993	15.32289523	0.148845478	44.24953279	2.722077597	0.791819973	0.5	0.5	0.745015481	10.05392364	2	1.267373386	292.6883
321	1	0	pop_healthy_1000_anth	63.65579939	0.222930366	40	46.81094407	1.194834067	1.37392856	16.89796373	0.47	1.114138816	0.430906382	0.0280758	11.87163435	1.463100151	0.467961775	11.00170613	0.79	0.8	0.002	0.16	0.18	0.15	0.92	0.853	0.002024	0.0016	0.135	0.009	0.03	0.020732715	0.034689207	0.083041361	0.471155118	0.624996819	0.51263164	14.90719742	0.11432033	44.64998642	2.42758176	1.635902066	0.5	0.5	0.968607916	10.57181198	2	1.512179778	292.6883
322	1	0	pop_healthy_1000_anth	58.27336971	0.197533583	40	23.64878608	0.780844205	1.022407001	17.17570593	0.448829287	0.809254145	0.3989426	0.030500463	10.4643004	1.495344837	0.513853063	8.428921709	0.760731489	0.770361002	0.001925903	0.185404856	0.215566798	0.179638998	0.885915152	0.821397418	0.001949013	0.001540722	0.161675098	0.01077834	0.0359278	0.025049831	0.03237123	0.126338804	0.355270927	0.713364137	0.336480788	15.11936365	0.118181977	45.1582376	3.461472962	0.567890948	0.489173297	0.489173297	0.693850284	10.8200288	1.956684721	0.671054061	292.6883
323	1	0	pop_healthy_1000_anth	58.40410164	0.224627607	40	27.53864026	1.067278963	0.849006196	16.12464304	0.461795468	0.888607528	0.401512585	0.027050677	9.637949096	1.572123837	0.506291449	9.840125042	0.778657234	0.788513655	0.001971284	0.169845439	0.193783615	0.161486345	0.906790703	0.840752684	0.00199494	0.001577027	0.145337711	0.009689181	0.032297269	0.025602488	0.037655255	0.104718593	0.380550769	0.661896139	0.521290011	14.9119293	0.145352727	44.72480996	3.243390573	1.173617771	0.495804202	0.495804202	0.424784345	12.51875228	1.983213527	0.821993552	292.6883
324	1	0	pop_healthy_1000_anth	67.44972965	0.21169006	40	23.91367024	1.317806723	0.917056322	17.85006795	0.449712234	0.899534543	0.391947606	0.029835147	11.49650059	1.433530179	0.478598701	11.40322326	0.761952164	0.771597128	0.001928993	0.184345319	0.214083447	0.178402872	0.887336697	0.822715438	0.001952141	0.001543194	0.160562585	0.010704172	0.035680574	0.024660319	0.03322091	0.115116281	0.388748636	0.634253732	0.475862568	14.79962968	0.115045167	45.17248138	3.48611704	1.316523052	0.489624837	0.489624837	1.466976297	10.63131379	1.958491231	0.880200613	292.6883
325	1	0	pop_healthy_1000_anth	74.06435065	0.235210883	40	58.61382067	1.009552114	0.634148547	17.74499592	0.47	0.669548577	0.319113107	0.027796239	11.69732866	1.548619762	0.495361876	14.02796657	0.79	0.8	0.002	0.16	0.18	0.15	0.92	0.853	0.002024	0.0016	0.135	0.009	0.03	0.022279008	0.033088379	0.089835344	0.452427492	0.607251227	0.489428908	15.01245777	0.143582001	47.07254136	1.994869029	0.84380744	0.5	0.5	1.220685097	18.27515178	2	1.127593228	292.6883
326	1	0	pop_healthy_1000_anth	64.41070388	0.226629654	40	46.38466615	0.867582004	1.074136612	16.85856695	0.47	0.863105192	0.365285495	0.027769944	10.7519012	1.498113678	0.500236838	6.421267442	0.79	0.8	0.002	0.16	0.18	0.15	0.92	0.853	0.002024	0.0016	0.135	0.009	0.03	0.020749287	0.03415371	0.073224404	0.390584697	0.630007512	0.574037814	14.79055021	0.133345813	43.8399856	2.633630458	0.921159223	0.5	0.5	0.395099608	6.152913245	2	0.839718612	292.6883
327	1	0	pop_healthy_1000_anth	69.11871461	0.215600342	40	22.38660904	1.067430683	0.806775638	17.90494964	0.44462203	0.959880933	0.397845578	0.033108385	11.45367513	1.565825677	0.545790904	15.01900252	0.754914957	0.764470842	0.001911177	0.190453564	0.222634989	0.185529158	0.879141469	0.815117035	0.001934111	0.001528942	0.166976242	0.011131749	0.037105832	0.025700563	0.031479501	0.122076543	0.268599574	0.746759565	0.275719001	15.62011541	0.129577713	43.03309909	3.142184877	1.004078207	0.487021706	0.487021706	1.207200113	10.43722098	1.948076674	1.048085622	292.6883
328	1	0	pop_healthy_1000_anth	69.08666726	0.248648196	40	21.54958723	1.14822708	1.567194904	16.66880495	0.441831957	0.818960226	0.34574257	0.032361527	9.642513663	1.529683332	0.524252585	18.57712883	0.751057681	0.76056474	0.001901412	0.193801651	0.227322312	0.18943526	0.874649451	0.810952154	0.001924229	0.001521129	0.170491734	0.011366116	0.037887052	0.02730197	0.025932688	0.130243432	0.360091044	0.776062874	0.32135298	15.37106702	0.088176066	45.16130235	3.325099366	0.863110916	0.485594863	0.485594863	1.218000552	10.13912613	1.942368185	0.920463042	292.6883
329	1	0	pop_healthy_1000_anth	68.29808363	0.236277729	40	55.76873636	1.080355296	1.054921138	17.00172022	0.47	0.815748843	0.417993221	0.025856202	10.99322162	1.483387046	0.432075277	15.36419539	0.79	0.8	0.002	0.16	0.18	0.15	0.92	0.853	0.002024	0.0016	0.135	0.009	0.03	0.019404161	0.032042727	0.086594837	0.427692013	0.620024624	0.410009891	14.9083737	0.096774621	44.41600464	2.138457137	1.506171785	0.5	0.5	2.169568579	19.46876387	2	1.143735352	292.6883
330	1	0	pop_healthy_1000_anth	67.91289734	0.249047036	40	48.23884282	0.986012208	0.882001397	16.5133597	0.47	0.770363083	0.38944996	0.02825099	10.20817693	1.520858375	0.482670162	14.93703842	0.79	0.8	0.002	0.16	0.18	0.15	0.92	0.853	0.002024	0.0016	0.135	0.009	0.03	0.020021494	0.036567517	0.081168965	0.332133227	0.596142597	0.525071777	14.53406531	0.154845861	43.20273676	2.539237762	0.817862216	0.5	0.5	0.952748492	15.17206705	2	0.833288946	292.6883
331	1	0	pop_healthy_1000_anth	63.10503818	0.245504638	40	26.19177813	0.850376969	0.65436769	16.03253388	0.457305927	0.852239338	0.387583975	0.029771821	9.496242811	1.5803559	0.531291041	13.98933618	0.772450444	0.782228298	0.001955571	0.175232887	0.201326042	0.167771702	0.899562543	0.834050923	0.001979038	0.001564457	0.150994532	0.010066302	0.03355434	0.025508839	0.032490834	0.105278074	0.361162127	0.674885739	0.375587439	14.92334385	0.106673666	44.53803822	3.105100181	1.756248876	0.493508251	0.493508251	0.84816694	16.63482028	1.974027927	1.279541224	292.6883
332	1	0	pop_healthy_1000_anth	70.12476057	0.233703383	40	44.74790457	0.883641779	1.285936855	17.32220587	0.47	1.03053559	0.399932363	0.025976613	11.74977174	1.554476259	0.526489484	12.96917242	0.79	0.8	0.002	0.16	0.18	0.15	0.92	0.853	0.002024	0.0016	0.135	0.009	0.03	0.022340192	0.035659239	0.075740341	0.416503203	0.666843073	0.497040435	15.27555131	0.117289405	44.89379894	2.599030485	1.586511762	0.5	0.5	0.454636537	10.88661464	2	1.053233708	292.6883
333	1	0	pop_healthy_1000_anth	65.32520612	0.23148301	40	53.28228488	0.956650142	1.067746834	16.79889957	0.47	0.738184798	0.267606121	0.027942905	10.77833364	1.327567366	0.48202755	13.47856844	0.79	0.8	0.002	0.16	0.18	0.15	0.92	0.853	0.002024	0.0016	0.135	0.009	0.03	0.020216725	0.035661083	0.079290483	0.408550798	0.642167466	0.399305411	14.81305431	0.097358775	43.85416463	2.163177363	1.268118531	0.5	0.5	1.067417579	12.56263962	2	0.85411571	292.6883
334	1	0	pop_healthy_1000_anth	67.02958448	0.198612066	40	47.92341224	1.421857934	0.880952114	18.37090067	0.47	1.177495173	0.402141667	0.028900744	12.96632685	1.579143936	0.490378042	10.4714763	0.79	0.8	0.002	0.16	0.18	0.15	0.92	0.853	0.002024	0.0016	0.135	0.009	0.03	0.021242604	0.039434254	0.076726357	0.291200161	0.62905857	0.498018619	15.00827812	0.10776544	46.11842817	2.506522303	0.574583028	0.5	0.5	0.845066626	11.69497812	2	0.649702579	292.6883
335	1	0	pop_healthy_1000_anth	80.14529586	0.244491061	40	52.66231285	1.156403897	1.200057453	18.10537503	0.47	1.006632723	0.222868164	0.02462972	12.18433367	1.50797873	0.491193263	22.57071186	0.79	0.8	0.002	0.16	0.18	0.15	0.92	0.853	0.002024	0.0016	0.135	0.009	0.03	0.021272282	0.03720951	0.081464651	0.370320585	0.599013366	0.425151553	14.76819806	0.06433941	44.10310988	2.133880459	0.816102342	0.5	0.5	2.224609812	6.978791667	2	1.161030079	292.6883
336	1	0	pop_healthy_1000_anth	62.78956387	0.230484429	40	26.75401433	1.017993016	1.077955949	16.50528157	0.459180048	0.882671216	0.369346384	0.028909579	10.16434179	1.43647307	0.501714848	9.942242877	0.775041416	0.784852067	0.00196213	0.172983943	0.19817752	0.165147933	0.902579877	0.836848516	0.001985676	0.001569704	0.14863314	0.009908876	0.033029587	0.025861737	0.035035215	0.098357139	0.378348994	0.670361223	0.617345623	15.33195811	0.10868151	45.67326448	2.884765203	1.049233648	0.494466676	0.494466676	1.494981586	9.899262782	1.977862378	1.363381931	292.6883
337	1	0	pop_healthy_1000_anth	61.8274588	0.216418348	40	25.04728832	1.036593023	1.072106039	16.90221648	0.453490961	0.86381444	0.380227387	0.029516963	10.44768642	1.498785688	0.500256921	9.877618375	0.767176254	0.776887345	0.001942218	0.179810847	0.207735185	0.173112655	0.893420447	0.828356132	0.001965525	0.001553775	0.155801389	0.010386759	0.034622531	0.024943353	0.033144997	0.119228724	0.38367452	0.638824039	0.357117142	15.33024257	0.154961777	45.72300951	2.894832013	1.209794567	0.491557277	0.491557277	4.66470556	9.716637241	1.966222506	1.404456132	292.6883
338	1	0	pop_healthy_1000_anth	76.75459415	0.218657005	40	53.2458187	0.998514371	1.107271716	18.73572453	0.47	1.107861435	0.489732549	0.028537526	13.59816076	1.518138674	0.452715196	15.35182116	0.79	0.8	0.002	0.16	0.18	0.15	0.92	0.853	0.002024	0.0016	0.135	0.009	0.03	0.019081045	0.037486189	0.082775431	0.570609332	0.648008821	0.462965829	14.91069847	0.109913438	44.44033963	2.237534162	1.323357809	0.5	0.5	1.131635102	19.22560765	2	0.754984481	292.6883
339	1	0	pop_healthy_1000_anth	74.52974706	0.236125802	40	47.37398426	0.828312749	1.236137195	17.76614084	0.47	1.380127477	0.420446038	0.030069229	12.87349604	1.507285264	0.455491428	18.31757666	0.79	0.8	0.002	0.16	0.18	0.15	0.92	0.853	0.002024	0.0016	0.135	0.009	0.03	0.021843007	0.034706871	0.077484476	0.532078154	0.636238544	0.589413752	15.07900339	0.082290213	43.7458855	2.358435696	1.165009668	0.5	0.5	0.331186324	11.04176911	2	0.683719339	292.6883
340	1	0	pop_healthy_1000_anth	67.90498949	0.238195124	40	44.61463337	1.160355995	1.067792387	16.88435248	0.47	0.791388796	0.383356587	0.025075514	10.79493195	1.630999702	0.490352539	18.11117683	0.79	0.8	0.002	0.16	0.18	0.15	0.92	0.853	0.002024	0.0016	0.135	0.009	0.03	0.021482321	0.037834435	0.072946093	0.360916475	0.647934741	0.564652477	14.61220627	0.180254657	42.92060982	2.672709403	1.018225657	0.5	0.5	2.066373771	10.97508507	2	1.385079478	292.6883
341	1	0	pop_healthy_1000_anth	72.56163538	0.244731313	40	35.45702423	0.873734697	0.949590352	17.21903312	0.47	0.990602083	0.339285393	0.028699344	11.01513501	1.495067815	0.504979411	13.25698914	0.79	0.8	0.002	0.16	0.18	0.15	0.92	0.853	0.002024	0.0016	0.135	0.009	0.03	0.022381225	0.041297296	0.083996571	0.445381199	0.564952562	0.391287475	15.23565008	0.119579904	44.44848205	2.836853127	1.880603391	0.5	0.5	0.910942847	12.18687352	2	0.699657544	292.6883
342	1	0	pop_healthy_1000_anth	64.25208796	0.238927893	40	49.5869014	0.650797936	1.081544749	16.39872927	0.47	0.87470859	0.412835436	0.025956784	10.02323254	1.446725597	0.463854171	13.53206325	0.79	0.8	0.002	0.16	0.18	0.15	0.92	0.853	0.002024	0.0016	0.135	0.009	0.03	0.023039682	0.034530919	0.091303706	0.377994109	0.634009648	0.465736057	14.9865631	0.145527202	44.61545477	2.33792507	0.94396535	0.5	0.5	0.433002073	15.55633212	2	1.016586908	292.6883
343	1	0	pop_healthy_1000_anth	67.38665022	0.24044708	40	42.94999614	0.980388588	0.840156219	16.7408375	0.47	1.209772894	0.366676384	0.026197305	10.15617224	1.432938287	0.510952026	12.26489895	0.79	0.8	0.002	0.16	0.18	0.15	0.92	0.853	0.002024	0.0016	0.135	0.009	0.03	0.021849554	0.033873826	0.085309003	0.456749944	0.601028686	0.347251323	15.10220417	0.119437824	44.57698658	2.982171656	1.165126201	0.5	0.5	0.571112448	12.20832524	2	1.065656837	292.6883
344	1	0	pop_healthy_1000_anth	78.65211588	0.229122662	40	34.22188434	0.70624022	0.756272825	18.527686	0.47	1.032708673	0.523107862	0.027824139	13.51376123	1.397304063	0.551322472	18.9917132	0.79	0.8	0.002	0.16	0.18	0.15	0.92	0.853	0.002024	0.0016	0.135	0.009	0.03	0.02040386	0.043002883	0.079728816	0.419594162	0.647779365	0.537724795	15.19876998	0.111674275	45.6605004	2.956623458	1.823167361	0.5	0.5	0.705725717	7.173356339	2	1.964522859	292.6883
345	1	0	pop_healthy_1000_anth	78.41082093	0.232870361	40	30.38552229	0.885169843	1.009869973	18.34978129	0.47	0.962301892	0.469704589	0.029112345	12.96724072	1.586198181	0.549511782	13.90121617	0.79	0.8	0.002	0.16	0.18	0.15	0.92	0.853	0.002024	0.0016	0.135	0.009	0.03	0.023634442	0.039737031	0.076161776	0.412647809	0.630976969	0.473808127	14.96288525	0.096894181	45.00870444	3.191927608	0.870987276	0.5	0.5	2.157021362	30.16917673	2	0.856566679	292.6883
346	1	0	pop_healthy_1000_anth	56.60954365	0.216021058	40	22.78071696	0.923523269	0.74310154	16.18813371	0.445935723	0.868263912	0.354600452	0.032305431	9.342961854	1.517933439	0.496683204	10.53481053	0.756731137	0.766310012	0.001915775	0.188877132	0.220427985	0.183689988	0.881256514	0.817078051	0.001938764	0.00153262	0.165320989	0.011021399	0.036737998	0.02559327	0.029689571	0.119465025	0.363520714	0.750023404	0.379406394	14.63983139	0.118720585	43.964155	3.612445012	0.71963174	0.487693529	0.487693529	1.625812102	11.41829403	1.95076449	0.926012695	292.6883
347	1	0	pop_healthy_1000_anth	73.79082341	0.227812754	40	36.12667327	1.177069783	0.884566367	17.99749911	0.47	1.023464119	0.380820813	0.029240044	12.13748698	1.449957349	0.531179323	11.61311153	0.79	0.8	0.002	0.16	0.18	0.15	0.92	0.853	0.002024	0.0016	0.135	0.009	0.03	0.021988739	0.041025095	0.075897723	0.348753414	0.587062715	0.642831991	14.95831355	0.131070614	45.19274029	2.946114285	1.188581865	0.5	0.5	1.477311006	16.0766614	2	1.413811215	292.6883
348	1	0	pop_healthy_1000_anth	75.33190356	0.248859201	40	38.99608918	0.952142617	1.072521097	17.39853255	0.47	0.674775544	0.375766507	0.028671541	12.08900405	1.497474801	0.486789824	14.38202915	0.79	0.8	0.002	0.16	0.18	0.15	0.92	0.853	0.002024	0.0016	0.135	0.009	0.03	0.022658613	0.04010078	0.074106875	0.430548202	0.61293129	0.351398538	15.13297432	0.140633768	43.12069062	3.12454754	1.647008982	0.5	0.5	2.480499516	10.94983245	2	0.770175181	292.6883
349	1	0	pop_healthy_1000_anth	63.33486253	0.242515195	40	44.14950353	1.046198773	1.10966927	16.16039378	0.47	1.1019534	0.339532382	0.026797427	9.15985812	1.49473819	0.460097232	9.202564824	0.79	0.8	0.002	0.16	0.18	0.15	0.92	0.853	0.002024	0.0016	0.135	0.009	0.03	0.023179635	0.037091242	0.075108048	0.456998593	0.611267628	0.377435115	15.35019814	0.108358055	44.13299749	2.790478414	1.891393954	0.5	0.5	0.550843869	22.29258738	2	0.655714663	292.6883
350	1	0	pop_healthy_1000_anth	66.30133144	0.201195694	40	33.94512518	0.797995985	0.919788256	18.15314111	0.47	1.014903602	0.484642509	0.027786053	12.2440888	1.610961212	0.513743021	10.098974	0.79	0.8	0.002	0.16	0.18	0.15	0.92	0.853	0.002024	0.0016	0.135	0.009	0.03	0.022984799	0.040804293	0.080061131	0.513971855	0.675584562	0.318657212	15.50290376	0.09541436	44.96326081	3.072175453	0.835265198	0.5	0.5	1.2614186	11.03194369	2	1.120921783	292.6883
351	1	0	pop_healthy_1000_anth	51.51241718	0.231064397	40	28.41868895	1.108862078	0.787029892	14.93101901	0.464728963	0.809055937	0.403175857	0.030173009	8.364957186	1.448272269	0.488467037	10.04056334	0.782712792	0.792620548	0.001981551	0.166325244	0.188855342	0.157379452	0.911513631	0.84513166	0.00200533	0.001585241	0.141641506	0.009442767	0.03147589	0.021523426	0.031644257	0.097122693	0.329084729	0.64643343	0.256699173	15.38294887	0.085740139	43.62794016	2.999012877	0.809887069	0.497304392	0.497304392	0.809524693	24.81492509	1.989215459	0.796662596	292.6883
352	1	0	pop_healthy_1000_anth	56.74640258	0.222425914	40	25.14483983	1.342650837	0.91967803	15.97263161	0.453816133	0.868332923	0.369506768	0.029593046	9.216833654	1.440457606	0.531622204	11.93808491	0.767625804	0.777342586	0.001943356	0.179420641	0.207188897	0.172657414	0.893943974	0.828841532	0.001966677	0.001554685	0.155391673	0.010359445	0.034531483	0.026685312	0.030151004	0.100192387	0.362971376	0.697308123	0.451475605	14.64979475	0.105132204	43.80541378	3.354684271	3.392910201	0.49172357	0.49172357	0.989736013	15.9501185	1.966887808	0.745548332	292.6883
353	1	0	pop_healthy_1000_anth	78.6541084	0.243638429	40	24.21191696	0.840255534	0.75169489	17.96750652	0.45070639	0.874144759	0.419201115	0.029130867	11.65475716	1.587019442	0.532568187	19.52151048	0.763326584	0.772988946	0.001932472	0.183152332	0.212413265	0.177011054	0.888937288	0.824199463	0.001955662	0.001545978	0.159309949	0.010620663	0.035402211	0.027380073	0.033343895	0.117584154	0.352996143	0.695761112	0.401341352	15.04871147	0.09868994	45.43393293	3.729390034	0.934358677	0.490133248	0.490133248	0.565115055	17.42785868	1.960525274	0.792704157	292.6883
354	1	0	pop_healthy_1000_anth	63.97529307	0.228532562	40	30.39274903	0.882869487	1.357293014	16.73139291	0.47	0.976395539	0.397330036	0.026957684	10.46438478	1.491474176	0.571640654	11.18046796	0.79	0.8	0.002	0.16	0.18	0.15	0.92	0.853	0.002024	0.0016	0.135	0.009	0.03	0.021639165	0.037666149	0.075482331	0.28675427	0.640663373	0.39892173	15.00598504	0.07837865	44.08593304	3.059735507	1.540804175	0.5	0.5	0.875437174	12.32478587	2	0.997519856	292.6883
355	1	0	pop_healthy_1000_anth	68.26434809	0.205727333	40	48.88764161	1.116003415	1.197663691	18.21591434	0.47	0.797967762	0.313322177	0.027771662	13.60435594	1.505858932	0.508372244	9.726734377	0.79	0.8	0.002	0.16	0.18	0.15	0.92	0.853	0.002024	0.0016	0.135	0.009	0.03	0.022999804	0.038442611	0.080382438	0.496506933	0.649007845	0.407880361	14.01538341	0.105337916	47.08988973	2.225997293	1.063436953	0.5	0.5	0.282164974	4.870941897	2	0.918195676	292.6883
356	1	0	pop_healthy_1000_anth	82.20297752	0.241627088	40	35.88037156	1.273139912	0.975939001	18.44467316	0.47	1.03989248	0.415697591	0.027694698	12.88041989	1.638113878	0.460212177	22.06342868	0.79	0.8	0.002	0.16	0.18	0.15	0.92	0.853	0.002024	0.0016	0.135	0.009	0.03	0.022779389	0.038943512	0.085935395	0.551649464	0.627857819	0.488011395	15.31503338	0.121282915	43.08305781	3.093958772	1.185566096	0.5	0.5	1.635161763	27.28332126	2	1.145135629	292.6883
357	1	0	pop_healthy_1000_anth	61.03170133	0.236226844	40	27.03467148	1.335122646	1.077285905	16.07359845	0.460115572	0.84325251	0.361404761	0.031114824	9.518382983	1.572347159	0.491347037	11.89779027	0.776334778	0.7861618	0.001965405	0.171861314	0.19660584	0.1638382	0.90408607	0.838245019	0.001988989	0.001572324	0.14745438	0.009830292	0.03276764	0.023847928	0.036396223	0.094711776	0.310937652	0.684222802	0.391273669	14.59559621	0.137823857	44.60519821	3.005568387	0.572979909	0.494945103	0.494945103	0.539132237	23.17089308	1.979776459	1.661133767	292.6883
358	1	0	pop_healthy_1000_anth	66.40911546	0.208982781	40	52.42146177	1.175410149	1.071785342	17.82619264	0.47	0.837084236	0.442553823	0.027099445	11.90987242	1.554695137	0.491350042	8.935447056	0.79	0.8	0.002	0.16	0.18	0.15	0.92	0.853	0.002024	0.0016	0.135	0.009	0.03	0.020283627	0.035409308	0.073777224	0.358947016	0.628734867	0.700241759	14.84125167	0.09349222	43.10668215	2.402464777	1.092688096	0.5	0.5	0.936139308	12.94649785	2	0.685293519	292.6883
359	1	0	pop_healthy_1000_anth	75.01117219	0.22337711	40	36.71979054	1.120783938	0.813727998	18.32498561	0.47	1.138515041	0.398192021	0.029356885	12.56297156	1.475681334	0.485620901	12.97217568	0.79	0.8	0.002	0.16	0.18	0.15	0.92	0.853	0.002024	0.0016	0.135	0.009	0.03	0.022050657	0.038820377	0.083982536	0.348225388	0.592183896	0.451034487	15.29239832	0.137922054	43.43309451	3.028895683	0.489823172	0.5	0.5	1.67405888	8.795678593	2	0.901417455	292.6883
360	1	0	pop_healthy_1000_anth	66.00685705	0.214670133	40	44.02650136	0.902573871	1.302676105	17.53511886	0.47	0.806168937	0.458070889	0.028509833	11.62753291	1.51527818	0.411164384	9.840251924	0.79	0.8	0.002	0.16	0.18	0.15	0.92	0.853	0.002024	0.0016	0.135	0.009	0.03	0.021507057	0.036238566	0.079968096	0.42621914	0.623312688	0.850970422	14.33630586	0.123215686	44.17095911	2.753537809	0.94397679	0.5	0.5	0.300036823	16.22774939	2	0.662453331	292.6883
361	1	0	pop_healthy_1000_anth	58.24624705	0.247126976	40	53.55814997	0.953744661	0.829554683	15.35231583	0.47	1.102484521	0.45862435	0.028117559	8.919094431	1.607611343	0.480913834	10.84578356	0.79	0.8	0.002	0.16	0.18	0.15	0.92	0.853	0.002024	0.0016	0.135	0.009	0.03	0.024158272	0.033889075	0.08479267	0.499619967	0.648104316	0.322824698	14.86966702	0.080154891	43.9734837	2.178656476	0.800097335	0.5	0.5	1.046374685	13.20756556	2	1.178996049	292.6883
362	1	0	pop_healthy_1000_anth	62.11221713	0.213738413	40	23.45590267	0.815754685	0.944596799	17.04697115	0.448186342	0.885768215	0.39998463	0.03036229	10.44772144	1.397195346	0.518506516	10.49493861	0.759842618	0.769460879	0.001923652	0.186176389	0.216646945	0.180539121	0.884880011	0.820437662	0.001946736	0.001538922	0.162485209	0.010832347	0.036107824	0.026059878	0.02789885	0.120478705	0.385289767	0.695048988	0.266848659	15.81956082	0.097429469	46.51223303	3.692491036	0.787401876	0.488844495	0.488844495	1.222233497	7.163861871	1.955369256	1.073824789	292.6883
363	1	0	pop_healthy_1000_anth	70.52621124	0.212309645	40	37.38867718	0.802999517	1.319087284	18.22596006	0.47	0.900867315	0.489633614	0.027571718	13.5328006	1.475426464	0.484490934	12.07377479	0.79	0.8	0.002	0.16	0.18	0.15	0.92	0.853	0.002024	0.0016	0.135	0.009	0.03	0.021480078	0.042531137	0.073998356	0.401134115	0.587248405	0.732760784	15.33324982	0.089545572	44.09444829	2.968020173	0.634811891	0.5	0.5	1.344512301	34.69593244	2	1.569155036	292.6883
364	1	0	pop_healthy_1000_anth	63.48796771	0.218559328	40	23.63806041	0.832823456	1.035038177	17.04358849	0.448793535	0.864401845	0.385399525	0.032201626	10.52720369	1.429589897	0.537180981	10.99131401	0.760682062	0.770310949	0.001925777	0.185447758	0.215626862	0.179689051	0.885857591	0.821344049	0.001948887	0.001540622	0.161720146	0.010781343	0.03593781	0.024857572	0.031350723	0.123932213	0.358858325	0.758335914	0.383370149	15.24499396	0.091974682	44.61868213	3.413721509	0.978270149	0.489155014	0.489155014	1.115929277	14.51880531	1.956611572	0.847313713	292.6883
365	1	0	pop_healthy_1000_anth	72.65785326	0.226646212	40	44.05794407	1.353547727	0.833389507	17.90470001	0.47	0.899517516	0.513958792	0.026794325	12.19046121	1.454363152	0.502747028	17.52237987	0.79	0.8	0.002	0.16	0.18	0.15	0.92	0.853	0.002024	0.0016	0.135	0.009	0.03	0.022451834	0.040280916	0.073570287	0.38146517	0.638083702	0.504334111	14.73139729	0.111021061	43.55024143	2.417314575	0.571855061	0.5	0.5	1.658838159	19.0807714	2	1.075520476	292.6883
366	1	0	pop_healthy_1000_anth	67.97858335	0.228192394	40	24.58955365	0.785674234	1.232145246	17.25978864	0.451965179	0.843039152	0.406634857	0.030298073	10.85823376	1.528531428	0.490611246	12.68838182	0.76506686	0.77475125	0.001936878	0.181641785	0.2102985	0.17524875	0.890963938	0.826078521	0.001960121	0.001549503	0.157723875	0.010514925	0.03504975	0.026928701	0.035124345	0.114872064	0.431464215	0.802022248	0.307822157	15.41757988	0.151223041	43.78896358	3.087129867	0.806923767	0.490776992	0.490776992	0.70178534	21.61150532	1.963100756	1.089059081	292.6883
367	1	0	pop_healthy_1000_anth	67.36761278	0.231889884	40	51.00575488	0.991540337	1.164469452	17.04451616	0.47	0.920664552	0.436577252	0.026093838	11.42721811	1.571118448	0.485463785	16.02847131	0.79	0.8	0.002	0.16	0.18	0.15	0.92	0.853	0.002024	0.0016	0.135	0.009	0.03	0.021278589	0.036084542	0.075126218	0.208033679	0.701543893	0.418543327	15.24722197	0.107959449	43.58125174	2.314579065	1.475677342	0.5	0.5	2.001091176	16.46687402	2	0.908017358	292.6883
368	1	0	pop_healthy_1000_anth	65.13662589	0.215757976	40	26.80407394	0.964542569	1.331074558	17.37517547	0.459346913	0.936782469	0.38743407	0.028309493	11.24177299	1.442418441	0.555319113	11.19905	0.775272107	0.785085678	0.001962714	0.172783704	0.197897186	0.164914322	0.90284853	0.837097605	0.001986267	0.001570171	0.148422889	0.009894859	0.032982864	0.022038396	0.032800637	0.097156557	0.46593329	0.67636751	0.520275699	14.3382408	0.142345248	43.50588185	2.981965146	1.135709009	0.494552011	0.494552011	1.188866338	23.73878347	1.978203784	1.618317639	292.6883
369	1	0	pop_healthy_1000_anth	70.41415847	0.233330238	40	53.07061972	0.934058681	0.948444059	17.37178657	0.47	0.999952749	0.427851877	0.027866166	11.05555962	1.487318682	0.473049439	9.699959535	0.79	0.8	0.002	0.16	0.18	0.15	0.92	0.853	0.002024	0.0016	0.135	0.009	0.03	0.021558519	0.035798828	0.075590046	0.369602108	0.641413249	0.505222726	15.02715798	0.129127489	44.9051328	2.422433787	0.856758959	0.5	0.5	4.350398488	11.38306546	2	0.996718519	292.6883
370	1	0	pop_healthy_1000_anth	61.45664786	0.214656879	40	26.40903242	0.926400007	0.889254801	16.92045466	0.458030108	0.928984593	0.399539917	0.030372624	10.44323418	1.429368672	0.52020944	9.257614539	0.773451624	0.783242151	0.001958105	0.17436387	0.200109418	0.166757849	0.900728474	0.835131944	0.001981603	0.001566484	0.150082064	0.010005471	0.03335157	0.025155722	0.031251775	0.100001726	0.265353089	0.607965729	0.382017997	14.98307252	0.095667567	42.6457074	3.525554691	0.739916302	0.493878597	0.493878597	0.912535683	20.78651059	1.975509601	0.886727967	292.6883
371	1	0	pop_healthy_1000_anth	65.02042679	0.235490413	40	40.37173635	0.754572544	0.878832541	16.61645181	0.47	0.945114778	0.341750072	0.024863456	10.85606985	1.559523586	0.513713618	14.53197522	0.79	0.8	0.002	0.16	0.18	0.15	0.92	0.853	0.002024	0.0016	0.135	0.009	0.03	0.022340734	0.037882599	0.083990518	0.417771935	0.646428522	0.543035859	15.33538658	0.043059676	44.47057045	2.838686457	0.429898786	0.5	0.5	0.947438401	15.33648774	2	1.245964518	292.6883
372	1	0	pop_healthy_1000_anth	74.76137238	0.235620831	40	27.58534484	0.998284195	1.235720702	17.81278356	0.461951149	1.015945459	0.399711773	0.027668583	11.85391325	1.457096364	0.515913077	15.39420595	0.778872464	0.788731609	0.001971829	0.169658621	0.193522069	0.161268391	0.907041351	0.840985078	0.001995491	0.001577463	0.145141552	0.009676103	0.032253678	0.022674414	0.040814434	0.092280486	0.337128036	0.626730169	0.390425606	15.03598913	0.141683878	45.0450551	3.099834373	0.882238696	0.495883818	0.495883818	0.694479448	29.51162975	1.983532052	1.56251789	292.6883
373	1	0	pop_healthy_1000_anth	72.06091453	0.23106212	40	26.63782418	0.903658044	0.91380598	17.65978892	0.458792747	0.993440498	0.403601284	0.029320503	11.65736564	1.583498362	0.500090947	12.48877365	0.774505973	0.784309846	0.001960775	0.173448703	0.198828185	0.165690154	0.901956323	0.836270373	0.001984304	0.00156862	0.149121138	0.009941409	0.033138031	0.0234225	0.034990964	0.106946622	0.296128772	0.668955206	0.463365098	14.68974686	0.121566084	45.50257178	2.881182922	1.620368288	0.494268611	0.494268611	0.95655682	7.45809812	1.977069961	0.867433111	292.6883
374	1	0	pop_healthy_1000_anth	87.74546846	0.2276599	40	55.23496266	0.843298387	0.929149439	19.63220491	0.47	1.052492124	0.407020058	0.026442637	14.71787565	1.578969772	0.522261453	21.55161336	0.79	0.8	0.002	0.16	0.18	0.15	0.92	0.853	0.002024	0.0016	0.135	0.009	0.03	0.021844498	0.03726566	0.082909009	0.535612054	0.654035192	0.514353022	14.74282387	0.101288278	45.32576198	2.127191694	1.332924694	0.5	0.5	1.111085969	29.19633432	2	1.487341186	292.6883
375	1	0	pop_healthy_1000_anth	64.63184124	0.223455748	40	42.70209612	0.713212885	0.925671013	17.00699168	0.47	0.940922107	0.519977059	0.027576205	10.729455	1.461373748	0.479182225	11.55044121	0.79	0.8	0.002	0.16	0.18	0.15	0.92	0.853	0.002024	0.0016	0.135	0.009	0.03	0.021066172	0.037878402	0.077650717	0.403434921	0.584001997	0.476276125	14.66661851	0.132887235	44.43920149	2.520218151	0.607772426	0.5	0.5	1.432612836	18.4850038	2	0.711303918	292.6883
376	1	0	pop_healthy_1000_anth	56.95512368	0.197439403	40	21.14437059	0.853867165	1.172630477	16.98437166	0.440481235	0.778413566	0.398266751	0.034001045	10.09205157	1.521298203	0.558957298	6.076314286	0.749190308	0.758673729	0.001896684	0.195422518	0.229591525	0.191326271	0.872474789	0.808935864	0.001919445	0.001517347	0.172193644	0.011479576	0.038265254	0.029793338	0.027919916	0.124354194	0.414089275	0.773163623	0.338357577	15.4308553	0.115493392	43.77631554	3.22944357	1.950089061	0.484904104	0.484904104	1.094001553	24.13471472	1.939604607	1.043645107	292.6883
377	1	0	pop_healthy_1000_anth	77.84124133	0.223059722	40	59.30242397	0.94130975	1.214870617	18.68074955	0.47	0.791304096	0.350359356	0.025327507	13.04165336	1.328590854	0.450762196	18.2004757	0.79	0.8	0.002	0.16	0.18	0.15	0.92	0.853	0.002024	0.0016	0.135	0.009	0.03	0.021726972	0.038925	0.079576705	0.475781453	0.69154019	0.513013485	15.13132879	0.119857312	42.77772078	2.040221721	0.74366379	0.5	0.5	1.237562525	16.00552396	2	1.390334087	292.6883
378	1	0	pop_healthy_1000_anth	58.0384289	0.194947725	40	53.82156511	0.79408777	0.902446444	17.25435537	0.47	0.670401265	0.584929156	0.027876212	10.35489198	1.532537078	0.464679154	8.518977572	0.79	0.8	0.002	0.16	0.18	0.15	0.92	0.853	0.002024	0.0016	0.135	0.009	0.03	0.021982849	0.029732999	0.078180604	0.467260479	0.681858669	0.455237483	15.42747857	0.070484506	44.22600353	2.246761603	0.674949389	0.5	0.5	1.257355553	19.09414531	2	0.594212461	292.6883
379	1	0	pop_healthy_1000_anth	77.16509358	0.231430613	40	28.78910575	0.784462163	0.924178872	18.25996922	0.465963686	0.928782776	0.39903196	0.02709141	12.73603533	1.617923768	0.538366024	11.94738148	0.784419796	0.79434916	0.001985873	0.164843577	0.186781008	0.15565084	0.913501534	0.846974792	0.002009703	0.001588698	0.140085756	0.00933905	0.031130168	0.022801195	0.039077786	0.08824675	0.336878297	0.672961265	0.168431102	14.81896962	0.13654167	44.29065979	2.945833953	0.854806042	0.497935829	0.497935829	1.338597703	21.5806831	1.991741701	1.021179201	292.6883
380	1	0	pop_healthy_1000_anth	59.3971346	0.208276316	40	30.21609579	0.803231178	1.058149099	16.88740053	0.47	1.017214498	0.432898429	0.027404844	10.91414236	1.532927125	0.477366087	9.649202572	0.79	0.8	0.002	0.16	0.18	0.15	0.92	0.853	0.002024	0.0016	0.135	0.009	0.03	0.021866101	0.037510716	0.078039431	0.403291374	0.611180866	0.421872458	14.85176082	0.113941221	43.69015272	3.178534852	2.499965411	0.5	0.5	1.055472635	15.44648899	2	0.732415589	292.6883
381	1	0	pop_healthy_1000_anth	67.63219663	0.222885083	40	28.76890513	1.152567276	1.193995511	17.41952245	0.46589635	0.842166616	0.38365941	0.028644	11.43043516	1.481605145	0.515363586	12.17400615	0.784326704	0.794254891	0.001985637	0.164924379	0.186894131	0.155745109	0.913393124	0.846874277	0.002009465	0.00158851	0.140170598	0.009344707	0.031149022	0.021325542	0.038763541	0.092764362	0.423798061	0.590294151	0.595693105	15.21277473	0.142055382	43.65752308	3.07366699	1.542869959	0.497901394	0.497901394	0.843602792	16.61733533	1.991603933	1.107566137	292.6883
382	1	0	pop_healthy_1000_anth	63.17844586	0.249631629	40	46.00596273	0.922402247	0.984948721	15.90869897	0.47	0.78092595	0.313874171	0.030656688	10.18752317	1.304969206	0.472555691	13.67227231	0.79	0.8	0.002	0.16	0.18	0.15	0.92	0.853	0.002024	0.0016	0.135	0.009	0.03	0.020749003	0.035358602	0.084213394	0.515046012	0.605540269	0.404895356	15.13199342	0.16407878	43.26991926	2.751162507	0.638843316	0.5	0.5	0.971888303	25.9841546	2	0.784024048	292.6883
383	1	0	pop_healthy_1000_anth	74.6895336	0.205447875	40	43.67201611	0.986866796	0.946159179	19.06685425	0.47	0.943785929	0.464879719	0.027944341	14.23916313	1.36245445	0.500225476	13.00340897	0.79	0.8	0.002	0.16	0.18	0.15	0.92	0.853	0.002024	0.0016	0.135	0.009	0.03	0.021435493	0.039850516	0.076907953	0.395360843	0.578602409	0.430996992	15.37780315	0.134602339	44.2388046	2.553248794	0.616456972	0.5	0.5	0.87083819	18.91427504	2	0.791737604	292.6883
384	1	0	pop_healthy_1000_anth	68.81056447	0.225095648	40	37.64891165	0.768238716	0.90718132	17.48412936	0.47	0.797319493	0.465561273	0.026211676	11.64343018	1.641871418	0.497969197	9.844810972	0.79	0.8	0.002	0.16	0.18	0.15	0.92	0.853	0.002024	0.0016	0.135	0.009	0.03	0.024024194	0.042496789	0.072945049	0.438737326	0.609689944	0.48820723	15.19581155	0.130956118	44.28517225	2.904115896	2.390119864	0.5	0.5	1.477414258	17.67281883	2	0.532465063	292.6883
385	1	0	pop_healthy_1000_anth	63.70566856	0.220033514	40	54.47296565	0.970044685	0.936009254	17.01549633	0.47	1.090002128	0.49213663	0.024895479	10.98203201	1.398160891	0.472621135	11.85632507	0.79	0.8	0.002	0.16	0.18	0.15	0.92	0.853	0.002024	0.0016	0.135	0.009	0.03	0.020108192	0.031162985	0.076559802	0.602482013	0.596764785	0.09833922	14.97955947	0.113808177	44.93395155	2.244564543	0.896574582	0.5	0.5	0.455265687	18.72097895	2	1.590627372	292.6883
386	1	0	pop_healthy_1000_anth	89.62900645	0.246492254	40	31.68637831	1.367668149	1.198358172	19.0687688	0.47	0.959649001	0.457652237	0.028230804	14.33152722	1.396902904	0.495920829	23.63317078	0.79	0.8	0.002	0.16	0.18	0.15	0.92	0.853	0.002024	0.0016	0.135	0.009	0.03	0.022389087	0.043295087	0.076379552	0.388065819	0.614680529	0.750969012	15.0132795	0.113797917	45.94112156	2.77835874	0.422869906	0.5	0.5	0.302020905	10.65212059	2	1.013523001	292.6883
387	1	0	pop_healthy_1000_anth	55.22932664	0.201919682	40	21.05683059	1.061039674	1.130532684	16.53847829	0.440189435	0.96377355	0.383580543	0.032606262	9.378593414	1.567570161	0.482950467	7.662204644	0.748786894	0.758265209	0.001895663	0.195772678	0.230081749	0.191734791	0.872004991	0.80850028	0.001918411	0.00151653	0.172561312	0.011504087	0.038346958	0.026877205	0.025621853	0.129422225	0.329521468	0.718421737	0.274906994	14.94983756	0.073294867	42.81087924	3.849850375	1.507059085	0.484754877	0.484754877	1.021328794	11.76891898	1.939007585	1.253539669	292.6883
388	1	0	pop_healthy_1000_anth	69.90946051	0.231445313	40	53.85834628	1.031256112	1.127667212	17.37976019	0.47	0.790721013	0.399286855	0.028925203	11.97253736	1.539552564	0.503375458	11.59558753	0.79	0.8	0.002	0.16	0.18	0.15	0.92	0.853	0.002024	0.0016	0.135	0.009	0.03	0.020713395	0.036630752	0.084475459	0.373645196	0.65092376	0.437926077	14.82175851	0.123623831	43.62638215	2.2393381	1.45789787	0.5	0.5	1.29832555	11.46103248	2	1.045600219	292.6883
389	1	0	pop_healthy_1000_anth	78.64684605	0.242180831	40	23.78753178	1.18585123	1.286101073	18.02066334	0.449291773	0.905926163	0.403318756	0.033026396	11.6566865	1.553658433	0.519520256	17.95735513	0.761370876	0.771008482	0.001927521	0.184849873	0.214789822	0.178991518	0.886659754	0.822087794	0.001950651	0.001542017	0.161092367	0.010739491	0.035798304	0.02767085	0.031166164	0.121068661	0.342137909	0.735809335	0.321962499	15.20971291	0.136550971	45.31916709	3.46432611	1.114146548	0.489409813	0.489409813	0.548547843	16.12352961	1.957630967	0.980287127	292.6883
390	1	0	pop_healthy_1000_anth	75.06985383	0.249288618	40	36.98383986	0.830162203	1.420024216	17.35327942	0.47	0.902458636	0.406366128	0.026672611	11.52431573	1.477273707	0.472999231	17.78545477	0.79	0.8	0.002	0.16	0.18	0.15	0.92	0.853	0.002024	0.0016	0.135	0.009	0.03	0.021818044	0.039485088	0.083690516	0.419547304	0.627674907	0.396325908	15.10045575	0.14103143	44.39146003	2.923823456	0.94309668	0.5	0.5	4.845423682	11.12044069	2	0.767364234	292.6883
391	1	0	pop_healthy_1000_anth	76.07553996	0.236523599	40	31.74299123	1.342387847	0.639857549	17.93433519	0.47	0.974649824	0.432991857	0.025204003	12.0265637	1.622008128	0.530157176	12.33445204	0.79	0.8	0.002	0.16	0.18	0.15	0.92	0.853	0.002024	0.0016	0.135	0.009	0.03	0.022579199	0.039846236	0.077894722	0.428232907	0.652700086	0.348583048	14.85354949	0.13328457	44.52398959	2.925939666	0.393456732	0.5	0.5	0.447961442	15.07510182	2	0.791330728	292.6883
392	1	0	pop_healthy_1000_anth	65.97881575	0.241373284	40	20.22352155	1.266714002	0.862694094	16.53322812	0.437411739	0.844812532	0.368534027	0.034058525	9.353801802	1.412732751	0.58648697	13.32642574	0.744946728	0.754376434	0.001885941	0.199105914	0.234748279	0.195623566	0.867532899	0.804353873	0.001908572	0.001508753	0.176061209	0.011737414	0.039124713	0.027847742	0.021759215	0.128093167	0.335913899	0.760753569	0.314203423	15.20019543	0.109831695	44.57062883	3.311950719	1.284206241	0.483334363	0.483334363	0.698844811	12.45557938	1.933324417	0.904594621	292.6883
393	1	0	pop_healthy_1000_anth	68.13802749	0.241826686	40	48.66840545	1.360296891	1.067616788	16.78582406	0.47	0.960030649	0.316071278	0.027584183	11.05155172	1.456042573	0.488016352	16.4836974	0.79	0.8	0.002	0.16	0.18	0.15	0.92	0.853	0.002024	0.0016	0.135	0.009	0.03	0.021962905	0.036692245	0.078878382	0.333644748	0.606487826	0.38426352	14.91907002	0.147138762	45.24475172	2.493443932	0.903894936	0.5	0.5	2.894108719	12.23709011	2	0.820137521	292.6883
394	1	0	pop_healthy_1000_anth	89.44125529	0.220522405	40	29.39633269	1.061013106	0.781226246	20.13921706	0.467987776	1.145794724	0.466771637	0.027260179	15.44415275	1.546383225	0.516151497	17.97232737	0.7872181	0.797182886	0.001992957	0.162414669	0.183380537	0.152817114	0.916760319	0.849996252	0.002016873	0.001594366	0.137535403	0.009169027	0.030563423	0.022485177	0.042874554	0.078736209	0.543534323	0.643193588	0.483795457	14.91226048	0.119524213	43.11371182	3.033759962	2.072569164	0.498970948	0.498970948	1.3402562	16.80754433	1.995882989	1.119163955	292.6883
395	1	0	pop_healthy_1000_anth	66.19838866	0.229485995	40	44.8621709	0.913302678	1.039783705	16.98422035	0.47	0.952844193	0.339646765	0.027684764	10.84121462	1.499038054	0.460032743	10.03889053	0.79	0.8	0.002	0.16	0.18	0.15	0.92	0.853	0.002024	0.0016	0.135	0.009	0.03	0.021360155	0.035832759	0.076372652	0.462394256	0.689294829	0.589118601	15.43771572	0.153040895	45.20420199	2.736562619	1.442977467	0.5	0.5	1.829516723	17.68173196	2	0.820084822	292.6883
396	1	0	pop_healthy_1000_anth	65.17797822	0.227544429	40	43.64580193	0.934488354	1.058312075	16.92455813	0.47	0.718156979	0.189533157	0.026842268	11.46156157	1.51531218	0.455156387	13.28508516	0.79	0.8	0.002	0.16	0.18	0.15	0.92	0.853	0.002024	0.0016	0.135	0.009	0.03	0.022395584	0.033490179	0.078893442	0.412667717	0.676925513	0.338310708	15.15458418	0.111410065	43.95567325	2.604162302	1.176827251	0.5	0.5	1.269586794	20.27386844	2	0.797585754	292.6883
397	1	0	pop_healthy_1000_anth	63.09179423	0.226386231	40	55.4623538	1.090931138	1.109115347	16.69403943	0.47	0.672448776	0.356065914	0.02756647	10.86211086	1.539134241	0.465662503	12.34197853	0.79	0.8	0.002	0.16	0.18	0.15	0.92	0.853	0.002024	0.0016	0.135	0.009	0.03	0.022838554	0.033506078	0.075735856	0.460795399	0.613038364	0.325292336	15.29467295	0.114974164	44.39356179	2.089432214	0.753756683	0.5	0.5	1.872873633	13.341598	2	1.369858608	292.6883
398	1	0	pop_healthy_1000_anth	84.99696001	0.242047779	40	38.87217487	0.723779669	1.318654792	18.73920429	0.47	1.203060314	0.364256288	0.028759249	13.38383377	1.5350248	0.510343952	11.73418598	0.79	0.8	0.002	0.16	0.18	0.15	0.92	0.853	0.002024	0.0016	0.135	0.009	0.03	0.022108687	0.041757287	0.072079076	0.600010595	0.620856199	0.783557353	15.06356258	0.142930748	43.72015291	2.800179048	0.911109117	0.5	0.5	1.116151919	12.65657674	2	0.813625608	292.6883
399	1	0	pop_healthy_1000_anth	66.03784433	0.223479841	40	51.09972562	1.365853403	0.743885208	17.19005505	0.47	1.037464809	0.428920757	0.028537168	11.04311735	1.42816546	0.483297305	13.84041598	0.79	0.8	0.002	0.16	0.18	0.15	0.92	0.853	0.002024	0.0016	0.135	0.009	0.03	0.021715929	0.033126524	0.078995694	0.378216099	0.591441395	0.275320168	14.99122308	0.09836183	45.688722	2.341134306	3.49011615	0.5	0.5	0.63082816	5.615183693	2	0.764830356	292.6883
400	1	0	pop_healthy_1000_anth	64.15093624	0.227075561	40	22.37521764	1.094771845	1.121399587	16.80801014	0.444584059	0.94063651	0.376995602	0.030659744	9.952716481	1.499405584	0.547971393	10.91215867	0.754862461	0.764417682	0.001911044	0.190499129	0.222698781	0.185582318	0.879080335	0.815060354	0.001933977	0.001528835	0.167024086	0.011134939	0.037116464	0.027806471	0.02681337	0.113530227	0.337773053	0.768611682	0.310183543	14.57366855	0.065986032	43.49442172	3.526980594	1.123403171	0.487002288	0.487002288	0.779161213	19.80438581	1.947998984	1.342940626	292.6883
401	1	0	pop_healthy_1000_anth	72.72648206	0.21488775	40	25.06144434	1.181185587	1.481228659	18.39672265	0.453538148	0.895109836	0.39947328	0.031294212	12.29292452	1.632420847	0.538497673	16.34409584	0.767241489	0.776953407	0.001942384	0.179754223	0.207655912	0.173046593	0.893496418	0.82842657	0.001965692	0.001553907	0.155741934	0.010382796	0.034609319	0.023235659	0.038604087	0.115219254	0.333195099	0.658172583	0.602478719	14.64906168	0.171950669	44.1494586	3.0800185	1.426711474	0.491581409	0.491581409	0.800601957	14.16115728	1.96631905	1.121016058	292.6883
402	1	0	pop_healthy_1000_anth	66.4000296	0.216651475	40	59.0311873	1.205998475	0.740657947	17.50666057	0.47	1.064120771	0.346226854	0.028332281	12.02632827	1.430957529	0.52797191	9.966115694	0.79	0.8	0.002	0.16	0.18	0.15	0.92	0.853	0.002024	0.0016	0.135	0.009	0.03	0.020845802	0.032184844	0.082466665	0.349719814	0.666924084	0.512187287	14.94163832	0.131744845	43.94339713	2.178428252	1.275192514	0.5	0.5	1.210586521	11.30725588	2	0.839161836	292.6883
403	1	0	pop_healthy_1000_anth	61.80934318	0.213196119	40	22.57464541	0.989885717	1.052068716	17.02697179	0.445248818	0.916113109	0.389210734	0.033834132	10.20148087	1.364345573	0.524564019	10.84953444	0.755781491	0.765348345	0.001913371	0.189701418	0.221581986	0.184651655	0.880150597	0.816052673	0.001936331	0.001530697	0.166186489	0.011079099	0.036930331	0.026920327	0.027594684	0.132128435	0.445311336	0.829967806	0.494783942	14.72164537	0.132840117	43.4972873	3.37155152	0.553611679	0.487342246	0.487342246	1.798640969	13.15682853	1.949359082	1.468660154	292.6883
404	1	0	pop_healthy_1000_anth	60.83273401	0.208102883	40	20.96112678	1.156330009	0.887796177	17.09738216	0.439870423	0.763745021	0.395334991	0.031066712	10.24103953	1.464325879	0.506011258	10.82226755	0.748345859	0.757818592	0.001894546	0.196155493	0.23061769	0.192181408	0.87149138	0.808024073	0.001917281	0.001515637	0.172963268	0.011530885	0.038436282	0.027565736	0.027334091	0.137734966	0.320026066	0.715043027	0.380560978	14.74604936	0.107819137	44.2165475	3.238849247	1.816538936	0.484591734	0.484591734	0.870261643	12.66781655	1.938354885	0.954174409	292.6883
405	1	0	pop_healthy_1000_anth	57.9941505	0.194369859	40	21.2714294	1.107102577	0.991100219	17.27339228	0.440904765	0.898373481	0.401285572	0.033210266	10.31334209	1.515446559	0.527014492	8.204295137	0.749775837	0.759266671	0.001898167	0.194914282	0.228879995	0.190733329	0.873156671	0.809568087	0.001920945	0.001518533	0.171659997	0.011444	0.038146666	0.027407776	0.028958318	0.136996219	0.337384042	0.834789449	0.379653493	14.95181485	0.110325921	44.13455294	3.495039829	1.009425708	0.485120697	0.485120697	0.619540424	8.07142557	1.940471148	1.360762173	292.6883
406	1	0	pop_healthy_1000_anth	69.81430177	0.216699128	40	29.30541186	1.193498973	1.230622257	17.94913888	0.467684706	0.976436133	0.386870475	0.030968027	12.28808069	1.552028778	0.504728886	12.3062572	0.786799106	0.796758589	0.001991896	0.162778353	0.183889694	0.153241411	0.916272377	0.849543845	0.002015799	0.001593517	0.13791727	0.009194485	0.030648282	0.023743574	0.039162068	0.089839089	0.382617848	0.663859128	0.528605582	15.19285641	0.146319019	43.56781184	3.102427698	1.399926986	0.498815959	0.498815959	1.612365268	13.86042394	1.995262909	0.870415362	292.6883
407	1	0	pop_healthy_1000_anth	66.59507732	0.222718669	40	38.0464282	1.154565241	0.835809355	17.29190148	0.47	0.86709901	0.416872269	0.026375829	11.84702716	1.5026075	0.537229105	7.002558393	0.79	0.8	0.002	0.16	0.18	0.15	0.92	0.853	0.002024	0.0016	0.135	0.009	0.03	0.022553006	0.040848235	0.081716635	0.539586867	0.624550184	0.450547846	14.95002373	0.103587638	43.71188772	2.950833804	0.8169284	0.5	0.5	0.816713805	20.41530151	2	1.326200486	292.6883
408	1	0	pop_healthy_1000_anth	71.01118769	0.210029613	40	51.86608245	0.908448941	1.090562203	18.38751847	0.47	0.697705576	0.422207654	0.028811163	12.31881791	1.490199046	0.497214436	14.30798904	0.79	0.8	0.002	0.16	0.18	0.15	0.92	0.853	0.002024	0.0016	0.135	0.009	0.03	0.022084432	0.032652224	0.081093182	0.508035677	0.648396338	0.402233916	15.24267926	0.137107937	44.65401654	2.343240737	1.859128489	0.5	0.5	0.360401063	14.01336955	2	1.463357023	292.6883
409	1	0	pop_healthy_1000_anth	75.25623141	0.239308858	40	44.73106274	0.679643913	1.065643747	17.73339329	0.47	1.055302634	0.482628597	0.027791967	13.05580844	1.52559013	0.486901224	14.05963091	0.79	0.8	0.002	0.16	0.18	0.15	0.92	0.853	0.002024	0.0016	0.135	0.009	0.03	0.020196631	0.038570904	0.081234433	0.422379575	0.614595314	0.203835351	14.82202457	0.095109103	44.24856576	2.553355736	1.107080287	0.5	0.5	1.893797332	22.01178154	2	0.905224657	292.6883
410	1	0	pop_healthy_1000_anth	64.3784018	0.231851261	40	32.52460667	1.138595707	0.920007566	16.66346695	0.47	0.945747732	0.396398762	0.027173213	10.57182588	1.563991835	0.486604821	9.946388354	0.79	0.8	0.002	0.16	0.18	0.15	0.92	0.853	0.002024	0.0016	0.135	0.009	0.03	0.020390425	0.038035351	0.086267089	0.505618225	0.572773315	0.468851088	15.09018201	0.0843613	44.60712862	2.842018894	0.454814616	0.5	0.5	0.990476842	10.55562477	2	1.113592008	292.6883
411	1	0	pop_healthy_1000_anth	76.79128158	0.220354843	40	25.45862222	1.0705877	1.162931142	18.66786527	0.454862074	0.958408423	0.401405529	0.030685647	12.68001705	1.556128915	0.530913426	9.863536763	0.769071817	0.778806904	0.001947017	0.178165511	0.205431716	0.171193096	0.895627939	0.830402861	0.001970381	0.001557614	0.154073787	0.010271586	0.034238619	0.026363884	0.032702441	0.112734833	0.529926932	0.722965169	0.46775104	15.27915425	0.114671311	46.59017281	3.363609094	0.432369542	0.492258465	0.492258465	1.598248712	8.883860129	1.969027804	0.872454309	292.6883
412	1	0	pop_healthy_1000_anth	72.08308351	0.248202237	40	41.54380153	0.981296876	1.513131389	17.04173598	0.47	1.371253626	0.484213314	0.027104033	11.39097833	1.387391851	0.485594704	21.8224802	0.79	0.8	0.002	0.16	0.18	0.15	0.92	0.853	0.002024	0.0016	0.135	0.009	0.03	0.02033378	0.035482677	0.087160461	0.523395143	0.635246976	0.408404063	14.73573293	0.140807359	44.50687965	2.519865883	1.219059445	0.5	0.5	0.613306451	10.48815676	2	0.739271032	292.6883
413	1	0	pop_healthy_1000_anth	87.92659615	0.248108719	40	43.90104412	1.39899287	1.171879965	18.82517911	0.47	0.99279041	0.416287433	0.027675913	13.93563995	1.477926814	0.49522113	21.61385234	0.79	0.8	0.002	0.16	0.18	0.15	0.92	0.853	0.002024	0.0016	0.135	0.009	0.03	0.021962792	0.041177356	0.081993087	0.427651429	0.662529634	0.472724956	14.69916369	0.16938855	46.66336236	2.554959311	0.44323494	0.5	0.5	0.974569226	16.10699452	2	0.55961704	292.6883
414	1	0	pop_healthy_1000_anth	74.45817036	0.211564551	40	27.13521894	0.91463578	1.107779772	18.76008187	0.46045073	0.934933239	0.404546956	0.028080015	13.32033795	1.46905884	0.53576469	19.39627853	0.776798134	0.786631022	0.001966578	0.171459124	0.196042774	0.163368978	0.904625675	0.838745327	0.001990176	0.001573262	0.14703208	0.009802139	0.032673796	0.022495116	0.036416569	0.097589637	0.250134891	0.667120326	0.220874924	15.07983743	0.065143988	43.26263293	3.227261681	1.501238016	0.495116503	0.495116503	2.966083797	20.59566515	1.980462193	1.105986778	292.6883
415	1	0	pop_healthy_1000_anth	50.57850392	0.196232255	40	25.55409041	0.937391088	0.830823747	16.05453727	0.455180301	0.849667108	0.368261452	0.034231733	9.239414332	1.445992196	0.517089079	5.310978367	0.769511767	0.779252422	0.001948131	0.177783638	0.204897094	0.170747578	0.896140285	0.830877895	0.001971509	0.001558505	0.15367282	0.010244855	0.034149516	0.026248871	0.031577372	0.104857188	0.457534057	0.698261086	0.44364998	14.59899824	0.11702493	44.72684847	3.258984054	0.611595069	0.492421206	0.492421206	2.267068828	26.82098001	1.969678897	0.706474673	292.6883
416	1	0	pop_healthy_1000_anth	67.11628832	0.241393785	40	52.0121422	1.171979208	0.927797653	16.67442716	0.47	0.764892646	0.474396715	0.028912558	10.13216155	1.561760549	0.435781549	15.96074427	0.79	0.8	0.002	0.16	0.18	0.15	0.92	0.853	0.002024	0.0016	0.135	0.009	0.03	0.024179587	0.032124651	0.078362185	0.571191416	0.647238562	0.320629892	14.48666123	0.13328478	45.0866599	2.357752879	0.807009721	0.5	0.5	1.355878392	20.74676679	2	0.613687524	292.6883
417	1	0	pop_healthy_1000_anth	66.0086947	0.23682168	40	28.76710756	1.586476298	0.729417077	16.69513146	0.465890359	0.941982436	0.426972715	0.029421036	10.64980918	1.508707652	0.520559568	16.80644528	0.784318421	0.794246502	0.001985616	0.16493157	0.186904198	0.155753498	0.913383477	0.846865333	0.002009444	0.001588493	0.140178148	0.00934521	0.0311507	0.024037625	0.036102901	0.088756443	0.524653743	0.671324652	0.289805799	14.54062553	0.099516054	44.38139933	2.998355814	0.942689929	0.497898329	0.497898329	0.950236076	7.924825872	1.991591674	1.514623159	292.6883
418	1	0	pop_healthy_1000_anth	66.47905539	0.232942449	40	45.61052895	0.897035548	1.392200514	16.89344032	0.47	0.658017948	0.387501616	0.026889338	11.17210707	1.447514695	0.477995711	10.16316949	0.79	0.8	0.002	0.16	0.18	0.15	0.92	0.853	0.002024	0.0016	0.135	0.009	0.03	0.022628773	0.036010296	0.083040235	0.241297583	0.581374286	0.443423718	14.95420544	0.116969572	44.75416577	2.617565175	0.579412452	0.5	0.5	1.34869357	12.18256883	2	1.186114641	292.6883
419	1	0	pop_healthy_1000_anth	54.75879345	0.203218785	40	38.14336424	1.226793032	0.958906281	16.41515584	0.47	0.876681179	0.470761332	0.02722588	10.58573799	1.508980707	0.490672603	7.547546472	0.79	0.8	0.002	0.16	0.18	0.15	0.92	0.853	0.002024	0.0016	0.135	0.009	0.03	0.01956474	0.036695003	0.07914422	0.336238386	0.66678575	0.288521832	14.80456947	0.130552774	46.00234536	2.915704093	1.424898793	0.5	0.5	1.000585658	23.44268706	2	1.258339242	292.6883
420	1	0	pop_healthy_1000_anth	72.23392971	0.232385121	40	44.06813736	0.628279913	1.304873208	17.63057442	0.47	1.014294418	0.482485286	0.026960582	12.05143859	1.602711555	0.554373693	14.53322991	0.79	0.8	0.002	0.16	0.18	0.15	0.92	0.853	0.002024	0.0016	0.135	0.009	0.03	0.021253586	0.038305362	0.078973125	0.348259866	0.59772776	0.505992069	15.00918581	0.116530071	43.73351513	2.475132468	1.017298756	0.5	0.5	1.357735953	12.18023944	2	1.248213442	292.6883
421	1	0	pop_healthy_1000_anth	86.21521696	0.243562048	40	47.50691493	0.894644844	1.112840918	18.81426056	0.47	0.950972603	0.56769819	0.026588921	13.43998356	1.506711084	0.503193161	19.41255226	0.79	0.8	0.002	0.16	0.18	0.15	0.92	0.853	0.002024	0.0016	0.135	0.009	0.03	0.021080384	0.034731735	0.08374524	0.255686305	0.632882595	0.547496834	14.73579095	0.106544481	43.03110056	2.461714347	0.530491485	0.5	0.5	0.548762258	23.53105669	2	1.052215226	292.6883
422	1	0	pop_healthy_1000_anth	65.39418144	0.22362963	40	36.39862393	1.065813262	1.167655892	17.10034535	0.47	1.002211187	0.420610615	0.027281399	11.06326526	1.665760473	0.483607502	10.07845973	0.79	0.8	0.002	0.16	0.18	0.15	0.92	0.853	0.002024	0.0016	0.135	0.009	0.03	0.021196418	0.039858014	0.085373878	0.444065723	0.608679484	0.209279543	15.04787671	0.130184154	45.55535963	2.537862613	1.637903059	0.5	0.5	1.650123966	22.11837637	2	0.967898325	292.6883
423	1	0	pop_healthy_1000_anth	67.19107451	0.20523521	40	43.51895237	0.781552823	1.13558805	18.09380304	0.47	1.111335057	0.442775395	0.02855359	12.78442564	1.559877789	0.478646506	10.53832006	0.79	0.8	0.002	0.16	0.18	0.15	0.92	0.853	0.002024	0.0016	0.135	0.009	0.03	0.021021139	0.037061725	0.080230356	0.577310272	0.633619422	0.408460142	14.93441383	0.098960137	44.33312298	2.585740886	0.572556469	0.5	0.5	1.531723676	5.442909187	2	1.839005676	292.6883
424	1	0	pop_healthy_1000_anth	66.36680439	0.226256395	40	52.33865153	0.594991619	0.953955735	17.12675249	0.47	0.50178742	0.466196947	0.027384447	10.91702509	1.577005164	0.486119087	7.713699724	0.79	0.8	0.002	0.16	0.18	0.15	0.92	0.853	0.002024	0.0016	0.135	0.009	0.03	0.021604007	0.037124877	0.077853495	0.499665717	0.595090664	0.479512799	14.65918393	0.110813488	41.98560553	2.294887108	0.990010647	0.5	0.5	0.836589898	11.58442893	2	1.311510937	292.6883
425	1	0	pop_healthy_1000_anth	71.07290036	0.249454376	40	57.91544283	0.78504886	0.891772241	16.87937864	0.47	0.944975434	0.454628913	0.027883048	10.53055712	1.380821951	0.452087944	20.31267586	0.79	0.8	0.002	0.16	0.18	0.15	0.92	0.853	0.002024	0.0016	0.135	0.009	0.03	0.022040315	0.036185173	0.078769889	0.447602138	0.666876991	0.188397167	15.11159204	0.151377765	45.87378734	1.998046304	1.608627475	0.5	0.5	0.23297746	12.08002165	2	0.773506705	292.6883
426	1	0	pop_healthy_1000_anth	65.09881706	0.216119288	40	34.8059998	1.111522261	1.449228203	17.35560606	0.47	0.998000071	0.38320541	0.026940713	11.63245896	1.505108739	0.510867931	9.841295375	0.79	0.8	0.002	0.16	0.18	0.15	0.92	0.853	0.002024	0.0016	0.135	0.009	0.03	0.020911812	0.037562764	0.085557749	0.579570202	0.6749637	0.336293655	15.18383099	0.151141424	46.25508039	2.828865565	0.706328263	0.5	0.5	1.025265058	19.82674867	2	0.842620495	292.6883
427	1	0	pop_healthy_1000_anth	77.6993728	0.240011477	40	29.70648481	0.887406457	0.812147917	17.99255138	0.469021616	0.917542955	0.456484676	0.027207242	12.1849979	1.53916583	0.504385527	14.38706308	0.788647384	0.798630262	0.001996576	0.161174061	0.181643685	0.151369738	0.918424802	0.851539517	0.002020535	0.001597261	0.136232764	0.009082184	0.030273948	0.023799714	0.037107882	0.081103094	0.413770126	0.587614588	0.376684237	14.65573061	0.122927933	44.99336495	3.21756277	0.658141109	0.499499654	0.499499654	0.649288395	12.62656286	1.997998226	0.875885103	292.6883
428	1	0	pop_healthy_1000_anth	67.02779118	0.232269616	40	36.54595985	1.193612853	0.838644308	16.98756974	0.47	0.995179631	0.470995685	0.026019922	10.81465415	1.346618822	0.496441531	13.37888093	0.79	0.8	0.002	0.16	0.18	0.15	0.92	0.853	0.002024	0.0016	0.135	0.009	0.03	0.021210286	0.038603177	0.078023854	0.561358134	0.68796699	0.292931185	15.00448577	0.101013702	45.54898359	2.879548384	1.055315012	0.5	0.5	0.633259749	10.07074674	2	0.991095131	292.6883
429	1	0	pop_healthy_1000_anth	61.28921095	0.21533675	40	24.62389041	1.280145062	0.784155741	16.87069361	0.452079635	0.92157502	0.384478963	0.032283129	10.33131582	1.484699651	0.477702383	10.31589323	0.765225095	0.774911489	0.001937279	0.181504438	0.210106214	0.175088511	0.891148212	0.826249375	0.001960526	0.001549823	0.15757966	0.010505311	0.035017702	0.026256491	0.034353185	0.122980029	0.43813296	0.719039179	0.452621422	15.13356858	0.134593337	43.55579978	3.292777421	0.852689386	0.490835525	0.490835525	0.754255104	22.84642046	1.963334933	0.995802792	292.6883
430	1	0	pop_healthy_1000_anth	78.87245809	0.245721639	40	27.13833608	1.194258315	0.965198312	17.9159972	0.46046112	0.9734613	0.447139137	0.029119498	11.92842302	1.536364159	0.518628449	18.23811448	0.776812499	0.786645568	0.001966614	0.171446656	0.196025318	0.163354432	0.904642404	0.838760837	0.001990213	0.001573291	0.147018988	0.009801266	0.032670886	0.023306502	0.037111119	0.103698314	0.391768023	0.652613508	0.499185609	15.4141828	0.151281226	44.47357803	3.039820388	0.829079648	0.495121817	0.495121817	3.17188915	20.09824478	1.980483452	0.783037994	292.6883
431	1	0	pop_healthy_1000_anth	79.9010697	0.223808761	40	27.38882788	1.041177943	1.403079808	18.8946023	0.461296093	1.028595489	0.45602938	0.028917422	13.15014116	1.451779805	0.482479502	20.608521	0.777966848	0.78781453	0.001969536	0.170444688	0.194622564	0.16218547	0.90598671	0.840007243	0.001993171	0.001575629	0.145966923	0.009731128	0.032437094	0.025213002	0.037360664	0.094722822	0.354689115	0.664118011	0.462007881	15.48786244	0.134923454	45.19342852	2.849376659	0.968442764	0.495548822	0.495548822	0.444105521	11.7556455	1.982191806	0.657096596	292.6883
432	1	0	pop_healthy_1000_anth	71.28291048	0.232294031	40	23.71742472	1.08788487	0.947034778	17.51756293	0.449058082	1.018790386	0.428276973	0.031289808	11.03919904	1.517858071	0.504220679	17.78885353	0.761047799	0.770681315	0.001926703	0.185130301	0.215182422	0.179318685	0.886283513	0.821738953	0.001949824	0.001541363	0.161386816	0.010759121	0.035863737	0.027697822	0.031253249	0.11616716	0.264114189	0.710269996	0.411932719	15.09996613	0.074626488	44.60338442	3.44718978	0.742615969	0.489290303	0.489290303	0.696430058	29.9011498	1.957152837	1.102752548	292.6883
433	1	0	pop_healthy_1000_anth	76.25904737	0.219123692	40	26.12684461	0.955070111	1.091312251	18.65524769	0.457089482	0.956040241	0.438405339	0.032403586	12.81475683	1.401351568	0.525997499	13.8437189	0.772151209	0.781925275	0.001954813	0.175492622	0.20168967	0.168074725	0.899214066	0.833727824	0.001978271	0.001563851	0.151267253	0.010084484	0.033614945	0.025651224	0.037075315	0.107226415	0.469608936	0.658410256	0.442208433	15.21851435	0.129887934	44.06372831	2.81670555	1.323756294	0.493397561	0.493397561	0.676208331	17.85290449	1.97358508	1.312857462	292.6883
434	1	0	pop_healthy_1000_anth	72.01354466	0.210582924	40	26.49208594	0.967464526	0.912589079	18.49249537	0.458306953	0.956249765	0.391382469	0.029310162	12.82996404	1.509839041	0.537479525	12.59215241	0.773834363	0.783629734	0.001959074	0.174031656	0.199644319	0.166370266	0.901174195	0.835545204	0.001982583	0.001567259	0.149733239	0.009982216	0.033274053	0.025112519	0.038690735	0.106049945	0.470507103	0.659924059	0.409833675	14.90521359	0.096985762	42.29147129	3.208505267	0.927054558	0.494020176	0.494020176	1.097570222	19.36305247	1.976076026	1.030376939	292.6883
435	1	0	pop_healthy_1000_anth	74.85170399	0.245954212	40	45.57609196	1.051594587	0.852435672	17.44511006	0.47	0.771805879	0.422777917	0.027860099	11.59253208	1.573448402	0.472167773	20.21408792	0.79	0.8	0.002	0.16	0.18	0.15	0.92	0.853	0.002024	0.0016	0.135	0.009	0.03	0.01966617	0.034363055	0.087033538	0.553553095	0.615735556	0.360149592	14.745032	0.059494868	44.88392072	2.487125783	0.454721376	0.5	0.5	0.54625724	26.57376775	2	1.212874112	292.6883
436	1	0	pop_healthy_1000_anth	65.38196184	0.214264625	40	44.58198414	0.988662984	0.869312294	17.46842448	0.47	1.35876678	0.333184358	0.026302555	12.12794155	1.611216042	0.499345069	7.021827966	0.79	0.8	0.002	0.16	0.18	0.15	0.92	0.853	0.002024	0.0016	0.135	0.009	0.03	0.022134734	0.0389369	0.073425243	0.2995911	0.60061978	0.547610901	15.0996632	0.091948952	43.63460651	2.692301742	0.60620151	0.5	0.5	2.021916532	14.27407515	2	0.719972312	292.6883
437	1	0	pop_healthy_1000_anth	76.87859346	0.232171327	40	45.28045082	0.957164577	0.901588038	18.1969425	0.47	1.010143357	0.427604178	0.029791045	13.19185722	1.476798302	0.528960829	14.79270063	0.79	0.8	0.002	0.16	0.18	0.15	0.92	0.853	0.002024	0.0016	0.135	0.009	0.03	0.0196897	0.039424186	0.085740299	0.69964123	0.570553713	0.567719723	14.60948666	0.080014067	43.98323108	2.375135363	0.526192059	0.5	0.5	1.069317199	30.26657265	2	0.642018127	292.6883
438	1	0	pop_healthy_1000_anth	53.43752201	0.222691848	40	35.80924469	0.995272501	1.027789859	15.49069831	0.47	1.038930446	0.414359228	0.028881219	8.754913883	1.528857396	0.473161718	9.842047192	0.79	0.8	0.002	0.16	0.18	0.15	0.92	0.853	0.002024	0.0016	0.135	0.009	0.03	0.022305679	0.037838199	0.071748899	0.241284417	0.636141514	0.535169061	15.53191341	0.114843417	43.81428727	3.087317635	1.467398608	0.5	0.5	0.354407181	14.38192913	2	0.716129783	292.6883
439	1	0	pop_healthy_1000_anth	70.27804853	0.221008546	40	33.29875202	1.058061241	1.05021059	17.83221588	0.47	0.959219169	0.455495855	0.027377598	12.06946892	1.394367603	0.48536952	12.5237027	0.79	0.8	0.002	0.16	0.18	0.15	0.92	0.853	0.002024	0.0016	0.135	0.009	0.03	0.017878435	0.041165657	0.087972445	0.454550744	0.580429627	0.490261763	15.41872639	0.117620986	44.25291674	2.906593603	1.003552787	0.5	0.5	1.217546535	10.69788362	2	1.019738491	292.6883
440	1	0	pop_healthy_1000_anth	73.96755042	0.226674504	40	45.28033714	0.898868659	1.030446633	18.0642228	0.47	0.893781698	0.433970267	0.029195735	12.83748384	1.64153561	0.512647317	12.38088072	0.79	0.8	0.002	0.16	0.18	0.15	0.92	0.853	0.002024	0.0016	0.135	0.009	0.03	0.020912166	0.040159653	0.078195936	0.396108862	0.604950388	0.052169373	15.24523087	0.103668949	44.8765664	2.477150841	1.185623842	0.5	0.5	0.569970167	16.58023842	2	0.821096822	292.6883
441	1	0	pop_healthy_1000_anth	73.99121089	0.244871918	40	38.14185127	1.19725746	0.973005267	17.38283372	0.47	1.143582659	0.33741184	0.027167224	11.70298965	1.492018984	0.514842437	17.9572206	0.79	0.8	0.002	0.16	0.18	0.15	0.92	0.853	0.002024	0.0016	0.135	0.009	0.03	0.020334336	0.040765714	0.083571329	0.442696525	0.605654929	0.546193092	14.90665645	0.152585694	43.3307972	2.777738124	0.644592662	0.5	0.5	0.979610587	9.288167142	2	1.044009327	292.6883
442	1	0	pop_healthy_1000_anth	68.25300116	0.248862794	40	57.29233166	1.094637808	0.726386704	16.56078388	0.47	0.923569636	0.334659365	0.027293491	9.362062897	1.476082072	0.48273775	17.53207187	0.79	0.8	0.002	0.16	0.18	0.15	0.92	0.853	0.002024	0.0016	0.135	0.009	0.03	0.022234151	0.032864305	0.077234772	0.399153763	0.637133393	0.463915593	14.69007667	0.098032157	44.81405237	2.03983574	1.292431306	0.5	0.5	0.505737653	11.69217804	2	0.802880362	292.6883
443	1	0	pop_healthy_1000_anth	72.67139073	0.233588876	40	36.38061629	0.889046215	0.956208231	17.63825663	0.47	1.1801972	0.408617541	0.027926183	12.08178637	1.599693743	0.52988632	11.37120122	0.79	0.8	0.002	0.16	0.18	0.15	0.92	0.853	0.002024	0.0016	0.135	0.009	0.03	0.024069343	0.039867251	0.075480088	0.308267039	0.620206085	0.447428779	15.13138844	0.152489003	43.95886881	3.010481291	3.096364229	0.5	0.5	3.129316011	8.505466782	2	1.032846082	292.6883
444	1	0	pop_healthy_1000_anth	62.4297005	0.218632085	40	27.27882117	0.771369968	0.736312045	16.89813121	0.460929404	0.832053592	0.415764404	0.028471478	10.85164842	1.543545131	0.54900821	9.387477532	0.777459901	0.787301165	0.001968253	0.170884715	0.195238601	0.162698835	0.90539634	0.839459868	0.001991872	0.001574602	0.146428951	0.00976193	0.032539767	0.023566022	0.037240971	0.100916771	0.254804142	0.685939915	0.490178979	15.12150734	0.119240208	43.39877673	3.411390771	1.974866702	0.495361297	0.495361297	0.387399275	18.92774411	1.98144156	1.862767016	292.6883
445	1	0	pop_healthy_1000_anth	69.31523271	0.236853939	40	54.1980181	0.806718599	1.269830667	17.10700714	0.47	1.022534381	0.422234016	0.029015466	11.49090208	1.428093497	0.510017839	15.07321408	0.79	0.8	0.002	0.16	0.18	0.15	0.92	0.853	0.002024	0.0016	0.135	0.009	0.03	0.01978324	0.031452098	0.086220272	0.417220344	0.584101521	0.693796605	15.46511973	0.072155707	42.80998498	2.111348331	0.221366337	0.5	0.5	1.222401617	21.73876953	2	0.704824601	292.6883
446	1	0	pop_healthy_1000_anth	63.10663104	0.19177292	40	20.25442233	0.927680302	1.091894216	18.14027461	0.437514741	0.909269644	0.431795774	0.033220753	11.37016017	1.507503288	0.515480186	7.6189205	0.74508913	0.754520638	0.001886302	0.198982311	0.234575235	0.195479362	0.867698733	0.80450763	0.001908937	0.001509041	0.175931426	0.011728762	0.039095872	0.028736549	0.028913353	0.135689133	0.26396879	0.773569801	0.565450044	14.99195181	0.112452902	42.89728797	3.389201469	0.55007012	0.483387039	0.483387039	0.984756926	18.95104898	1.93353516	1.098127338	292.6883
447	1	0	pop_healthy_1000_anth	64.39471221	0.230285793	40	39.74950953	1.272178029	0.97401174	16.72212748	0.47	0.528212378	0.38454201	0.026691173	11.31968546	1.592061934	0.491129232	9.480767585	0.79	0.8	0.002	0.16	0.18	0.15	0.92	0.853	0.002024	0.0016	0.135	0.009	0.03	0.022381486	0.043605178	0.079768763	0.338071921	0.630926523	0.399361966	15.08578613	0.086260149	42.85581115	2.627331338	2.016269894	0.5	0.5	2.057091371	13.97917323	2	1.383532441	292.6883
448	1	0	pop_healthy_1000_anth	67.93750462	0.2107934	40	49.22990784	0.923373714	1.02473909	17.95255605	0.47	0.82572969	0.353961587	0.027862239	11.99002622	1.434276556	0.501284934	12.89274301	0.79	0.8	0.002	0.16	0.18	0.15	0.92	0.853	0.002024	0.0016	0.135	0.009	0.03	0.021204651	0.035229805	0.077431601	0.69849552	0.715119295	0.65124472	14.99265843	0.140662184	46.26839774	2.480632524	0.673650467	0.5	0.5	1.889026964	7.648078902	2	1.324479622	292.6883
449	1	0	pop_healthy_1000_anth	52.1738428	0.200319482	40	25.63259913	1.13253585	1.213115298	16.13856139	0.455441997	0.893719974	0.367776086	0.029615285	9.593235379	1.454259791	0.527346335	7.990561088	0.769873561	0.779618796	0.001949047	0.177469603	0.204457445	0.170381204	0.896561615	0.831268541	0.001972436	0.001559238	0.153343084	0.010222872	0.034076241	0.025533537	0.0333205	0.107722497	0.316593772	0.699951122	0.446139094	15.01079339	0.095456366	44.32346596	3.33112888	1.399337889	0.492555037	0.492555037	0.625807702	18.28556892	1.970214326	1.180579989	292.6883
450	1	0	pop_healthy_1000_anth	67.28497757	0.24762137	40	51.26550903	0.934466971	1.34420004	16.48409069	0.47	1.032135608	0.39954123	0.024497348	10.09442496	1.501730346	0.486750976	11.36867377	0.79	0.8	0.002	0.16	0.18	0.15	0.92	0.853	0.002024	0.0016	0.135	0.009	0.03	0.021985134	0.036588705	0.083031278	0.237776497	0.631188219	0.505692072	14.94283834	0.098034278	44.37837614	2.309504169	0.258393888	0.5	0.5	1.188027131	14.94759533	2	0.692547678	292.6883
451	1	0	pop_healthy_1000_anth	77.86369636	0.233908172	40	52.92701414	0.864009776	1.175167361	18.24503963	0.47	1.133494399	0.379978692	0.027876529	12.75241154	1.45736985	0.466525831	19.84232528	0.79	0.8	0.002	0.16	0.18	0.15	0.92	0.853	0.002024	0.0016	0.135	0.009	0.03	0.021787536	0.037520695	0.073885784	0.151933518	0.627624801	0.500014272	14.70235327	0.129868619	44.63711034	2.364930171	0.555190877	0.5	0.5	0.374235014	21.32211141	2	1.170933501	292.6883
452	1	0	pop_healthy_1000_anth	54.97364022	0.19154461	40	24.24152555	1.071647708	0.95112685	16.94112629	0.450805085	0.874584088	0.394511473	0.028877229	10.31466223	1.409168025	0.506006626	6.919564723	0.76346303	0.773127119	0.001932818	0.183033898	0.212247457	0.176872881	0.889096187	0.824346791	0.001956012	0.001546254	0.159185593	0.010612373	0.035374576	0.027309445	0.032863064	0.120388797	0.371632722	0.710610473	0.289469729	14.82704616	0.08981134	42.1188275	3.251630417	0.252857027	0.490183721	0.490183721	0.532154946	12.87116711	1.960727204	0.858592753	292.6883
453	1	0	pop_healthy_1000_anth	67.86635447	0.236873218	40	26.63942186	0.963608115	0.911016583	16.92658244	0.458798073	0.937612607	0.394378206	0.030304127	10.5411918	1.566142956	0.528381567	10.04593406	0.774513336	0.784317302	0.001960793	0.173442313	0.198819238	0.165682698	0.901964897	0.836278323	0.001984323	0.001568635	0.149114428	0.009940962	0.03313654	0.022836305	0.032412712	0.097110159	0.31461472	0.658231788	0.390527811	15.33356646	0.117858976	43.78172422	3.269925266	1.141810312	0.494271334	0.494271334	2.198117634	25.90562283	1.977080857	1.632413698	292.6883
454	1	0	pop_healthy_1000_anth	69.026132	0.241998533	40	29.19547568	1.238959001	1.03812323	16.8888626	0.467318252	0.916676248	0.402957607	0.027377086	10.92743361	1.532138459	0.502801174	14.55586304	0.786292484	0.796245553	0.001990614	0.163218097	0.184505336	0.153754447	0.915682386	0.848996821	0.002014501	0.001592491	0.138379002	0.009225267	0.030750889	0.022219938	0.036131767	0.081883085	0.438187805	0.689739546	0.458267449	14.73951151	0.128224686	43.38326446	3.063316591	1.149284593	0.498628554	0.498628554	0.569583485	17.43599844	1.994513144	1.05557102	292.6883
455	1	0	pop_healthy_1000_anth	63.76335351	0.246064037	40	51.51555463	0.984692822	1.295736115	16.09761376	0.47	0.958376184	0.42626036	0.027702517	9.712357871	1.567438386	0.490919962	11.32709896	0.79	0.8	0.002	0.16	0.18	0.15	0.92	0.853	0.002024	0.0016	0.135	0.009	0.03	0.021818633	0.03377521	0.086482252	0.556530604	0.687534883	0.438043727	14.68751922	0.088846659	46.10686531	2.400685787	0.631122879	0.5	0.5	0.760064994	18.28040271	2	1.231714769	292.6883
456	1	0	pop_healthy_1000_anth	73.57110265	0.233572961	40	55.6736552	1.028753574	0.762031925	17.74771104	0.47	0.813901903	0.481534887	0.028573718	11.62740747	1.440802481	0.466619332	14.65592074	0.79	0.8	0.002	0.16	0.18	0.15	0.92	0.853	0.002024	0.0016	0.135	0.009	0.03	0.022787923	0.038318228	0.085388705	0.35756103	0.67272514	0.316997977	14.94809521	0.146281393	45.23552869	2.181052234	0.607392585	0.5	0.5	0.808475716	6.832884356	2	1.26818961	292.6883
457	1	0	pop_healthy_1000_anth	68.30278904	0.237139135	40	57.19221715	1.068476143	0.96576193	16.9713974	0.47	0.714943006	0.404723276	0.025825464	11.01460695	1.3119421	0.451737735	8.080889435	0.79	0.8	0.002	0.16	0.18	0.15	0.92	0.853	0.002024	0.0016	0.135	0.009	0.03	0.02096513	0.031242076	0.073668557	0.51226011	0.632944645	0.685105298	15.49828567	0.134198986	45.02836775	1.939391764	1.579441551	0.5	0.5	1.230773272	12.09818065	2	0.989039248	292.6883
458	1	0	pop_healthy_1000_anth	61.99101862	0.235947318	40	28.58715505	0.958778235	1.045238727	16.20902395	0.465290517	0.959299305	0.35970087	0.027670741	9.752314716	1.549171575	0.513503374	13.45990447	0.78348914	0.793406724	0.001983517	0.16565138	0.187911932	0.156593276	0.912417732	0.845969919	0.002007319	0.001586813	0.140933949	0.009395597	0.031318655	0.023039603	0.035150631	0.088642124	0.43370243	0.642459122	0.453400873	14.87648358	0.097973126	45.36392969	3.046805285	1.507341623	0.49759157	0.49759157	0.428246829	27.86630072	1.990364397	1.565095242	292.6883
459	1	0	pop_healthy_1000_anth	75.68788272	0.248602785	40	42.54103222	1.090262323	1.125363395	17.4485838	0.47	1.114217268	0.284541341	0.029332983	11.68491889	1.613030751	0.503339651	18.21701252	0.79	0.8	0.002	0.16	0.18	0.15	0.92	0.853	0.002024	0.0016	0.135	0.009	0.03	0.021265839	0.038985998	0.084353679	0.540672559	0.616657979	0.789300705	15.04098441	0.076128155	44.33320598	2.451533215	0.860945558	0.5	0.5	1.762496723	15.07319933	2	1.023245121	292.6883
460	1	0	pop_healthy_1000_anth	63.13508622	0.224438001	40	27.42232006	1.119405248	0.690991263	16.77209035	0.461407734	0.846725055	0.411836259	0.026743798	10.42170919	1.472313651	0.48717979	9.292645171	0.778121192	0.787970827	0.001969927	0.17031072	0.194435008	0.162029173	0.906166451	0.840173894	0.001993566	0.001575942	0.145826256	0.00972175	0.032405835	0.024373733	0.036455621	0.103417416	0.274960371	0.596177347	0.45802536	15.36666788	0.120003955	45.08491188	3.09883214	0.884404896	0.495605915	0.495605915	1.782651013	21.47606068	1.982420223	1.301954721	292.6883
461	1	0	pop_healthy_1000_anth	80.08712734	0.239428993	40	53.61500047	0.99790674	0.945585005	18.28912753	0.47	1.274365178	0.442877001	0.027674494	12.98053607	1.405092993	0.494782564	15.67424256	0.79	0.8	0.002	0.16	0.18	0.15	0.92	0.853	0.002024	0.0016	0.135	0.009	0.03	0.021687186	0.034666553	0.077783173	0.510395075	0.668751046	0.531030116	14.85805711	0.140361588	43.87499719	2.397030697	0.741507622	0.5	0.5	3.393564985	15.9447323	2	1.115285182	292.6883
462	1	0	pop_healthy_1000_anth	74.57671525	0.23526761	40	40.03443216	0.838355079	0.90128065	17.80412174	0.47	0.722198088	0.38055497	0.028110672	11.31937362	1.460266262	0.507175731	18.10811897	0.79	0.8	0.002	0.16	0.18	0.15	0.92	0.853	0.002024	0.0016	0.135	0.009	0.03	0.020124626	0.043904079	0.084496002	0.419394455	0.639432298	0.287973355	15.26170928	0.102653425	45.4084169	2.662091803	1.34856284	0.5	0.5	1.457326423	16.23413481	2	1.233496222	292.6883
463	1	0	pop_healthy_1000_anth	55.99606497	0.220428591	40	20.18307632	1.025692339	1.060829923	15.93840256	0.437276921	0.801356115	0.388238918	0.032025693	8.82506687	1.487324829	0.562911046	12.26315105	0.744760343	0.754187689	0.001885469	0.199267695	0.234974773	0.195812311	0.867315843	0.804152624	0.001908095	0.001508375	0.176231079	0.011748739	0.039162462	0.029817522	0.021862911	0.148534605	0.256748788	0.876427086	0.450893783	15.39115938	0.101817012	43.67301552	3.528132851	0.923660027	0.483265417	0.483265417	0.661755293	8.647547456	1.93304858	1.679524985	292.6883
464	1	0	pop_healthy_1000_anth	58.71002937	0.214974502	40	22.32402943	0.769688964	1.322449125	16.52580686	0.444413431	0.87113977	0.389436162	0.028742338	9.693322231	1.483213608	0.50167594	10.19318346	0.754626569	0.764178804	0.001910447	0.190703882	0.222985435	0.185821196	0.878805625	0.81480565	0.001933372	0.001528358	0.167239076	0.011149272	0.037164239	0.023783634	0.029003628	0.119363106	0.283271689	0.711510695	0.460023758	15.18156187	0.116727325	43.78973506	3.538754226	1.23319705	0.486915029	0.486915029	0.734802944	10.65289471	1.947649881	0.877653883	292.6883
465	1	0	pop_healthy_1000_anth	65.73386333	0.245238828	40	35.78709516	0.970902511	1.03769056	16.37193317	0.47	0.926755557	0.448498436	0.029168518	9.9055261	1.538887033	0.510025345	14.08299054	0.79	0.8	0.002	0.16	0.18	0.15	0.92	0.853	0.002024	0.0016	0.135	0.009	0.03	0.020765793	0.036534875	0.086795219	0.477387739	0.645420671	0.449950306	15.00132903	0.125358337	45.24874526	2.851964134	1.321481285	0.5	0.5	1.104292732	21.96897689	2	1.447645879	292.6883
466	1	0	pop_healthy_1000_anth	75.18423867	0.241739332	40	49.58348089	1.056147553	1.344253578	17.63557987	0.47	0.776866323	0.339164497	0.026909447	12.76111098	1.541531806	0.487726567	13.6945436	0.79	0.8	0.002	0.16	0.18	0.15	0.92	0.853	0.002024	0.0016	0.135	0.009	0.03	0.024483979	0.036115727	0.079530874	0.533088882	0.62976222	0.602544914	14.50910369	0.163146988	45.24062067	2.509493737	1.22182452	0.5	0.5	1.20462538	13.94383749	2	1.086595975	292.6883
467	1	0	pop_healthy_1000_anth	74.39589468	0.249181787	40	58.05226682	0.956371286	1.015565707	17.2789098	0.47	0.80976501	0.333162378	0.027453835	10.91687877	1.57919965	0.463645585	21.7713586	0.79	0.8	0.002	0.16	0.18	0.15	0.92	0.853	0.002024	0.0016	0.135	0.009	0.03	0.021086687	0.033847601	0.085801881	0.433655568	0.592381019	0.551292758	14.90568265	0.100089552	44.50539707	1.996077094	0.934253768	0.5	0.5	1.003937739	30.84505722	2	1.006058512	292.6883
468	1	0	pop_healthy_1000_anth	74.07940703	0.205226033	40	47.56440374	1.032932106	0.917597758	18.99907788	0.47	0.768801432	0.320666369	0.028094058	12.74803875	1.532277125	0.465926121	11.3096192	0.79	0.8	0.002	0.16	0.18	0.15	0.92	0.853	0.002024	0.0016	0.135	0.009	0.03	0.022899242	0.041133925	0.079984354	0.620207268	0.630741102	0.692613152	14.88561568	0.136888426	44.71108634	2.344820263	0.760057252	0.5	0.5	1.155544798	9.873857166	2	1.149291958	292.6883
469	1	0	pop_healthy_1000_anth	74.39635792	0.216590252	40	23.1608855	1.189053315	0.782065149	18.53345484	0.447202952	0.98287675	0.404369808	0.030135803	12.44568021	1.536893851	0.513440339	13.2295239	0.758483081	0.768084132	0.00192021	0.187356458	0.218299041	0.181915868	0.883296752	0.818969706	0.001943253	0.001536168	0.163724281	0.010914952	0.036383174	0.027132248	0.030936134	0.123732582	0.355237401	0.811171751	0.475617902	14.51947023	0.135063232	44.7221763	3.274229229	1.366226517	0.488341589	0.488341589	1.1907456	12.21810794	1.953357239	1.294136704	292.6883
470	1	0	pop_healthy_1000_anth	67.77838174	0.227637996	40	28.41753586	0.727250565	1.103819089	17.25532809	0.46472512	0.920387768	0.410826792	0.028084927	11.20433829	1.444432665	0.533566463	8.208320988	0.782707478	0.792615167	0.001981538	0.166329857	0.188861799	0.157384833	0.911507442	0.845125922	0.002005316	0.00158523	0.141646349	0.00944309	0.031476967	0.02220358	0.039959456	0.087135248	0.448308138	0.698330205	0.504041205	15.30179981	0.094140797	43.25365141	3.238025769	1.523247617	0.497302426	0.497302426	0.369947986	18.14406192	1.989207595	0.690738914	292.6883
471	1	0	pop_healthy_1000_anth	55.90690251	0.210242248	40	48.40595867	0.993617043	0.856526712	16.30694926	0.47	0.863002168	0.162847733	0.027955767	10.29994524	1.493772408	0.499920105	6.815714651	0.79	0.8	0.002	0.16	0.18	0.15	0.92	0.853	0.002024	0.0016	0.135	0.009	0.03	0.022078293	0.0353294	0.077988394	0.209582564	0.618925777	0.565435323	15.14886746	0.069133167	44.08949302	2.47322249	2.099970427	0.5	0.5	0.86112036	12.20911872	2	1.035292742	292.6883
472	1	0	pop_healthy_1000_anth	57.65487729	0.196476844	40	28.40407873	1.137590444	1.001754502	17.13019629	0.464680262	0.935155743	0.405671457	0.02803986	10.86267319	1.383722651	0.570994756	8.610926507	0.782645463	0.792552367	0.001981381	0.166383685	0.188937159	0.157447633	0.911435223	0.845058962	0.002005157	0.001585105	0.141702869	0.009446858	0.031489527	0.022156325	0.036630871	0.085504817	0.488419426	0.683689789	0.247622981	15.1935372	0.104275999	43.71444263	2.639936222	1.816544622	0.497279486	0.497279486	0.834706024	12.71579492	1.989115817	1.823566499	292.6883
473	1	0	pop_healthy_1000_anth	68.86868732	0.210869695	40	36.32161875	1.183251391	1.08954862	18.07190011	0.47	0.891564175	0.459195088	0.027206758	12.87283591	1.624471571	0.515999062	8.936228823	0.79	0.8	0.002	0.16	0.18	0.15	0.92	0.853	0.002024	0.0016	0.135	0.009	0.03	0.019879232	0.038966276	0.082342712	0.393123567	0.666322621	0.479437316	15.7110605	0.159862629	42.78416934	2.770375669	0.788400736	0.5	0.5	1.415422744	12.08236862	2	0.691173924	292.6883
474	1	0	pop_healthy_1000_anth	101.1543173	0.231444009	40	56.9060187	0.812782053	1.154924661	20.90591787	0.47	1.318742296	0.58167369	0.028019425	16.40446751	1.483584767	0.525490732	22.57293566	0.79	0.8	0.002	0.16	0.18	0.15	0.92	0.853	0.002024	0.0016	0.135	0.009	0.03	0.020483595	0.04213839	0.079363639	0.590410075	0.654643527	0.701284856	14.50103414	0.134541978	44.68793664	2.010999819	1.195951706	0.5	0.5	1.020375984	9.487373055	2	1.208508838	292.6883
475	1	0	pop_healthy_1000_anth	64.38848166	0.216062503	40	51.23275764	1.008707063	1.128336027	17.26292529	0.47	0.999100906	0.36977104	0.028124932	11.6894066	1.417581906	0.481260829	13.14998874	0.79	0.8	0.002	0.16	0.18	0.15	0.92	0.853	0.002024	0.0016	0.135	0.009	0.03	0.022566033	0.036940113	0.083398756	0.540778876	0.675931831	0.378763731	15.04631319	0.068072877	44.25842909	2.350598043	0.682301938	0.5	0.5	1.891695927	11.49033135	2	0.669818085	292.6883
476	1	0	pop_healthy_1000_anth	81.22069602	0.242866271	40	26.44279128	1.071979692	1.313524492	18.2873068	0.458142638	0.827931554	0.416225266	0.029271623	12.42404336	1.528131953	0.497550643	18.42657226	0.773607196	0.783399693	0.001958499	0.174228835	0.199920369	0.166600307	0.900909647	0.835299922	0.001982001	0.001566799	0.149940277	0.009996018	0.033320061	0.023018613	0.037051316	0.093426696	0.416082079	0.609755584	0.27363354	14.96809772	0.111484287	45.93049621	3.101229872	1.213215046	0.493936145	0.493936145	2.126197821	28.00038621	1.975739837	1.235845912	292.6883
477	1	0	pop_healthy_1000_anth	74.10033841	0.210692916	40	53.3799887	0.980439386	0.839263986	18.75362076	0.47	0.790175718	0.484563872	0.025902594	13.61446039	1.549675538	0.503143778	17.02460256	0.79	0.8	0.002	0.16	0.18	0.15	0.92	0.853	0.002024	0.0016	0.135	0.009	0.03	0.020813386	0.037055741	0.082856778	0.338247179	0.676754818	0.53082945	14.62119097	0.103370607	45.53370269	2.178029694	0.9591301	0.5	0.5	0.731008123	16.40071911	2	0.946620514	292.6883
478	1	0	pop_healthy_1000_anth	61.52180081	0.210921735	40	20.67747179	0.957289783	0.963351133	17.07866232	0.438924906	0.870069533	0.392734369	0.032479803	10.10615642	1.440095963	0.496625727	8.555113045	0.747038683	0.756494868	0.001891237	0.197290113	0.232206158	0.193505132	0.869969099	0.806612653	0.001913932	0.00151299	0.174154618	0.011610308	0.038701026	0.028631902	0.026402869	0.136788362	0.358752564	0.76021569	0.364371116	15.17785101	0.158091382	44.92005823	3.423809231	3.414979724	0.484108197	0.484108197	0.823039413	20.77904735	1.936420358	1.207256383	292.6883
479	1	0	pop_healthy_1000_anth	75.78931052	0.216415976	40	36.52296367	0.892239732	1.056340925	18.71368517	0.47	0.850139032	0.496322253	0.028844406	12.97320015	1.531542812	0.521143868	9.366187483	0.79	0.8	0.002	0.16	0.18	0.15	0.92	0.853	0.002024	0.0016	0.135	0.009	0.03	0.023001618	0.043670502	0.07781687	0.491560117	0.611037765	0.610551375	15.11064435	0.099744398	44.01544656	2.961195051	1.248330007	0.5	0.5	0.789713441	15.30964258	2	1.809151114	292.6883
480	1	0	pop_healthy_1000_anth	78.64348046	0.216045492	40	33.72844043	1.053410715	0.76253534	19.07913838	0.47	1.016645239	0.408399318	0.029652673	13.90222867	1.572446663	0.502451431	9.229331227	0.79	0.8	0.002	0.16	0.18	0.15	0.92	0.853	0.002024	0.0016	0.135	0.009	0.03	0.021089172	0.047500041	0.081552446	0.47488891	0.64925825	0.92509102	14.96367393	0.082664832	44.19016571	2.886584669	1.48081825	0.5	0.5	1.016722806	10.04077769	2	1.032032891	292.6883
481	1	0	pop_healthy_1000_anth	72.79691899	0.248647531	40	21.87153556	1.050581701	0.911411404	17.11056788	0.442905119	0.88677911	0.38029724	0.031447906	10.29971735	1.534551239	0.558671662	18.914691	0.752541326	0.762067166	0.001905168	0.192513858	0.225519401	0.187932834	0.876377241	0.812554116	0.00192803	0.001524134	0.169139551	0.01127597	0.037586567	0.027310728	0.02717511	0.143569685	0.300754296	0.760665306	0.419550035	14.81303456	0.119240095	43.02416643	3.531461844	0.967724672	0.486143678	0.486143678	2.937559762	21.70244852	1.944563872	0.615611426	292.6883
482	1	0	pop_healthy_1000_anth	68.11461429	0.232770633	40	25.75273089	1.090368432	0.722737239	17.10629894	0.455842436	0.839731959	0.413637517	0.028335627	10.59334926	1.553238913	0.560674785	14.06135317	0.770427168	0.780179411	0.001950449	0.176989076	0.203784707	0.169820589	0.897206322	0.831866297	0.001973854	0.001560359	0.15283853	0.010189235	0.033964118	0.023616364	0.033550586	0.108494295	0.340978527	0.699795942	0.4875531	14.98192285	0.154130554	44.02008618	3.426034694	2.438976742	0.492759822	0.492759822	1.293003149	41.7056872	1.971033625	1.010847371	292.6883
483	1	0	pop_healthy_1000_anth	60.21274799	0.225423565	40	50.65838504	1.122207406	0.820690912	16.34348118	0.47	0.622394508	0.415669416	0.025416757	10.3411446	1.498007248	0.473497997	13.7993064	0.79	0.8	0.002	0.16	0.18	0.15	0.92	0.853	0.002024	0.0016	0.135	0.009	0.03	0.023490764	0.030664198	0.087258233	0.294926886	0.61231058	0.343486399	15.35133281	0.136046155	44.16366811	2.514491558	0.548382563	0.5	0.5	0.694911391	11.56089666	2	1.311375465	292.6883
484	1	0	pop_healthy_1000_anth	65.92322793	0.219100772	40	37.18477822	0.949899913	1.064225813	17.34591756	0.47	0.830898982	0.381045616	0.02767638	11.21302436	1.485549566	0.528761371	10.94834816	0.79	0.8	0.002	0.16	0.18	0.15	0.92	0.853	0.002024	0.0016	0.135	0.009	0.03	0.022603464	0.03708646	0.077564326	0.48631595	0.641526895	0.506922758	14.83528757	0.130530033	44.59797251	2.843595312	1.098623431	0.5	0.5	0.609622071	21.28785077	2	1.150815563	292.6883
485	1	0	pop_healthy_1000_anth	66.34341161	0.242581601	40	31.29553566	0.827556769	0.966222823	16.53750434	0.47	0.957306661	0.36983864	0.026953403	10.7683261	1.395820849	0.54211823	11.75611074	0.79	0.8	0.002	0.16	0.18	0.15	0.92	0.853	0.002024	0.0016	0.135	0.009	0.03	0.021130101	0.041595709	0.081646699	0.39837905	0.640515332	0.478581455	14.93012785	0.108707297	43.93324602	2.986351266	0.319488123	0.5	0.5	0.643213744	12.99612512	2	0.830373284	292.6883
486	1	0	pop_healthy_1000_anth	77.30749476	0.239464146	40	46.02864399	1.013441446	0.937606185	17.96761986	0.47	0.582414545	0.431418967	0.02468699	12.04794175	1.559159204	0.528081181	22.21023316	0.79	0.8	0.002	0.16	0.18	0.15	0.92	0.853	0.002024	0.0016	0.135	0.009	0.03	0.023242142	0.036171248	0.081265822	0.313594215	0.640631955	0.550799389	15.13122777	0.092916384	44.70711278	2.771682195	1.484406235	0.5	0.5	1.636675289	19.56523567	2	0.986116649	292.6883
487	1	0	pop_healthy_1000_anth	70.58562784	0.220898388	40	45.73895519	0.9335384	1.137292869	17.87565103	0.47	0.778216584	0.565737298	0.026327183	11.79049571	1.534766257	0.487753322	14.59632666	0.79	0.8	0.002	0.16	0.18	0.15	0.92	0.853	0.002024	0.0016	0.135	0.009	0.03	0.022124094	0.037967014	0.076740093	0.371668047	0.699124812	0.700540424	15.05380361	0.147368759	45.61560814	2.634303793	0.404429126	0.5	0.5	0.555409821	5.872776433	2	1.622222791	292.6883
488	1	0	pop_healthy_1000_anth	78.76031004	0.243217034	40	31.22972271	0.762269991	1.126076844	17.99520152	0.47	0.945241191	0.448140567	0.026697548	12.24386099	1.539991137	0.490389494	21.52434911	0.79	0.8	0.002	0.16	0.18	0.15	0.92	0.853	0.002024	0.0016	0.135	0.009	0.03	0.021051263	0.04072152	0.080817675	0.471943251	0.637512539	0.428799117	14.97653867	0.129625242	44.3830257	3.164594957	1.056827259	0.5	0.5	0.602535035	14.30334993	2	1.052665131	292.6883
489	1	0	pop_healthy_1000_anth	60.21526508	0.204413632	40	26.30253524	1.081392014	0.973517378	17.16320436	0.457675117	0.873290817	0.451623633	0.028518276	10.83568794	1.456630754	0.542542893	7.942182546	0.77296085	0.782745164	0.001956863	0.174789859	0.200705803	0.167254836	0.900156939	0.834602032	0.001980345	0.00156549	0.150529352	0.01003529	0.033450967	0.025677392	0.036022431	0.096392817	0.397418097	0.683609614	0.36546481	15.10451899	0.121384997	43.48185974	3.274138078	3.202131189	0.493697055	0.493697055	1.280091831	32.53199165	1.97478329	1.194175438	292.6883
490	1	0	pop_healthy_1000_anth	89.30834338	0.235971848	40	31.28720157	1.316986599	0.911308158	19.45431395	0.47	1.043461431	0.461060697	0.025808778	14.49886559	1.532808388	0.524201928	19.93786789	0.79	0.8	0.002	0.16	0.18	0.15	0.92	0.853	0.002024	0.0016	0.135	0.009	0.03	0.020809235	0.045519284	0.073983435	0.534861025	0.659448868	0.286494419	15.06775749	0.080095678	45.09307405	2.932565691	1.26654114	0.5	0.5	0.686237131	22.85594796	2	0.870182353	292.6883
491	1	0	pop_healthy_1000_anth	69.26069267	0.229803296	40	59.44169756	1.107474039	0.76898343	17.36062228	0.47	0.958451749	0.557632413	0.027594628	10.93310053	1.439400051	0.474794456	12.4645524	0.79	0.8	0.002	0.16	0.18	0.15	0.92	0.853	0.002024	0.0016	0.135	0.009	0.03	0.022745356	0.037271389	0.083359517	0.514916491	0.637870922	0.455719912	15.54486011	0.062694972	45.60912942	2.012709581	0.720818107	0.5	0.5	0.611392346	42.17053579	2	1.218808793	292.6883
492	1	0	pop_healthy_1000_anth	75.89148785	0.226667894	40	28.37064112	1.026760251	0.854464437	18.29791174	0.464568804	1.001255726	0.416309134	0.029777183	12.88015745	1.650654146	0.549394863	8.747407197	0.782491371	0.792396325	0.001980991	0.166517436	0.18912441	0.157603675	0.911255774	0.844892582	0.002004763	0.001584793	0.141843307	0.00945622	0.031520735	0.021370232	0.039933778	0.093613674	0.340476	0.629537662	0.328634212	14.66818207	0.127010724	45.81510852	2.972856875	0.811070695	0.497222486	0.497222486	0.637542913	6.777237171	1.988887772	1.249539643	292.6883
493	1	0	pop_healthy_1000_anth	65.03144281	0.231385487	40	38.32873202	0.628865353	0.600577731	16.76461702	0.47	0.969166038	0.442634667	0.028844752	10.64835273	1.61383793	0.509783269	11.13868727	0.79	0.8	0.002	0.16	0.18	0.15	0.92	0.853	0.002024	0.0016	0.135	0.009	0.03	0.021735461	0.039968728	0.082816435	0.371949185	0.66472079	0.399560491	15.36736192	0.098628456	45.35545027	3.017863456	0.864034772	0.5	0.5	0.745253694	13.46373017	2	1.559270809	292.6883
494	1	0	pop_healthy_1000_anth	71.39986021	0.242908942	40	33.55318132	1.047431267	1.044853916	17.14458313	0.47	0.906632597	0.427662838	0.027365198	11.32798408	1.448464388	0.522274851	12.76559301	0.79	0.8	0.002	0.16	0.18	0.15	0.92	0.853	0.002024	0.0016	0.135	0.009	0.03	0.021927289	0.036704168	0.078604138	0.438083314	0.588598828	0.497414762	14.64547856	0.148772909	44.25648879	3.039413465	0.702105261	0.5	0.5	2.155535698	15.59279867	2	1.14300548	292.6883
495	1	0	pop_healthy_1000_anth	64.06461201	0.243954892	40	59.85236572	1.180960919	1.041162044	16.20519773	0.47	0.548133065	0.362411551	0.027546274	10.46149918	1.540395902	0.496091978	15.12910735	0.79	0.8	0.002	0.16	0.18	0.15	0.92	0.853	0.002024	0.0016	0.135	0.009	0.03	0.023411979	0.033724721	0.078077147	0.390775761	0.636445037	0.301963314	14.98833144	0.105073802	43.69206217	2.09314404	0.623406738	0.5	0.5	0.416047311	11.9068308	2	1.520865228	292.6883
496	1	0	pop_healthy_1000_anth	62.78110395	0.236155487	40	22.26759479	0.894680228	1.222423067	16.30479916	0.444225316	0.832261466	0.373464017	0.029300805	9.401011662	1.592916459	0.521428623	15.83109871	0.754366499	0.763915442	0.001909789	0.190929621	0.223301469	0.186084558	0.878502759	0.81452484	0.001932706	0.001527831	0.167476102	0.011165073	0.037216912	0.028057376	0.028533388	0.12352324	0.357600527	0.715012824	0.557638474	14.87082863	0.109879751	45.27359871	3.343932891	1.506325313	0.486818827	0.486818827	2.56345998	9.923190377	1.947264996	0.941399074	292.6883
497	1	0	pop_healthy_1000_anth	56.68944234	0.224113669	40	54.57419619	0.81086982	0.988194323	15.90438643	0.47	0.972882555	0.442295135	0.02744963	9.360465964	1.442325437	0.459396135	9.729323955	0.79	0.8	0.002	0.16	0.18	0.15	0.92	0.853	0.002024	0.0016	0.135	0.009	0.03	0.025285382	0.033789141	0.078162215	0.302997632	0.676698044	0.286508039	15.35143455	0.079278219	44.47286507	2.355038211	0.682329746	0.5	0.5	1.023709299	15.22103807	2	0.836897407	292.6883
498	1	0	pop_healthy_1000_anth	69.39232875	0.213004318	40	29.97759711	0.913848394	0.944465051	18.04934839	0.469925324	0.941136359	0.441217062	0.029298843	12.52109767	1.428711178	0.527229223	9.665368146	0.78989676	0.799895453	0.001999739	0.160089612	0.180125456	0.150104547	0.919879771	0.852888527	0.002023735	0.001599791	0.135094092	0.009006273	0.030020909	0.022860145	0.041292128	0.082865985	0.439850598	0.626379236	0.339124506	14.98705563	0.120074605	44.85377907	3.115984751	1.348821777	0.499961811	0.499961811	0.260324093	12.9779458	1.999847212	1.501218227	292.6883
499	1	0	pop_healthy_1000_anth	58.31799756	0.202493968	40	55.42566567	1.037251991	0.846174115	16.97052415	0.47	0.875158776	0.327690174	0.026381182	11.30121246	1.48851102	0.524722943	7.345427555	0.79	0.8	0.002	0.16	0.18	0.15	0.92	0.853	0.002024	0.0016	0.135	0.009	0.03	0.020646311	0.034616308	0.081850161	0.455947321	0.653899799	0.463156568	15.23329767	0.096711316	44.0555937	2.249608216	0.97579919	0.5	0.5	1.272754222	11.10136313	2	1.193323353	292.6883
500	2	0	pop_healthy_1000_anth	59.01134293	0.239920769	40	48.59647192	1.155511715	0.996458545	15.68316914	0.41	0.974394759	0.213497135	0.032507558	8.634537034	1.380236293	0.478440983	18.13221111	0.79	0.8	0.002	0.16	0.18	0.15	0.92	0.853	0.002024	0.0016	0.135	0.009	0.03	0.026798972	0.006584059	0.09802427	0.364332214	0.896885261	0.284474861	15.16065675	0.093784313	44.82331211	2.42109558	0.824890567	0.5	0.5	0.717747397	7.972219593	2	1.069183618	292.6883
501	2	0	pop_healthy_1000_anth	65.92587365	0.247357443	40	56.40151385	1.002043855	0.908831445	16.32546105	0.41	0.906648729	0.21524264	0.03373927	9.639811739	1.257477881	0.495894633	26.07706156	0.79	0.8	0.002	0.16	0.18	0.15	0.92	0.853	0.002024	0.0016	0.135	0.009	0.03	0.02576674	0.005644747	0.092806822	0.415537497	0.925041891	0.267675921	14.83191682	0.110380143	43.09467156	2.363938461	0.700173974	0.5	0.5	1.566554238	10.77308038	2	1.210602409	292.6883
502	2	0	pop_healthy_1000_anth	62.92599377	0.241818604	40	41.17942487	0.791836978	1.093776888	16.13133041	0.41	0.758114813	0.302903762	0.033662598	9.029484474	1.358690377	0.518959254	17.80274391	0.79	0.8	0.002	0.16	0.18	0.15	0.92	0.853	0.002024	0.0016	0.135	0.009	0.03	0.027358073	0.012371766	0.086080723	0.386031742	0.914493033	0.303264219	14.80804708	0.126857822	42.38230434	2.568878299	0.516965146	0.5	0.5	0.788706002	35.05038987	2	1.455046282	292.6883
503	2	0	pop_healthy_1000_anth	61.86888875	0.223755714	40	59.13741596	0.9970987	1.01394297	16.62834746	0.41	1.097898534	0.350349226	0.032096603	8.614273575	1.433635388	0.505899627	17.29555738	0.79	0.8	0.002	0.16	0.18	0.15	0.92	0.853	0.002024	0.0016	0.135	0.009	0.03	0.025244546	0.005573617	0.085702404	0.318610622	0.912453435	0.500379189	14.88059456	0.147368795	45.58261398	2.265495707	1.495252499	0.5	0.5	1.173103017	21.04199644	2	1.271391017	292.6883
504	2	0	pop_healthy_1000_anth	52.16375465	0.238078813	40	58.86800902	1.110641358	0.780200631	14.80212433	0.41	0.77781995	0.36258907	0.033389335	6.707635754	1.314720817	0.522684012	18.82804756	0.79	0.8	0.002	0.16	0.18	0.15	0.92	0.853	0.002024	0.0016	0.135	0.009	0.03	0.024882554	0.005931893	0.097712911	0.249848521	0.980544477	0.35248877	15.01447407	0.140160424	44.62442896	2.190526972	1.599615269	0.5	0.5	2.125730545	12.82362797	2	0.944592203	292.6883
505	2	0	pop_healthy_1000_anth	59.66919372	0.221761172	40	26.65114384	0.979658944	1.015263057	16.40334165	0.41	0.641683993	0.313207679	0.034663558	9.153075638	1.197401674	0.539954226	20.60316287	0.774567355	0.784372005	0.00196093	0.173395425	0.198753594	0.165627995	0.902027805	0.83633665	0.001984461	0.001568744	0.149065196	0.00993768	0.033125599	0.02713426	0.011147357	0.105416182	0.274785878	0.83965669	0.455378065	15.27442889	0.116249445	46.0821241	2.575223214	1.28165864	0.498631434	0.498631434	0.660363767	9.320931943	1.994530202	0.936898906	292.6883
506	2	0	pop_healthy_1000_anth	57.69829206	0.199377414	40	28.22155055	0.790613115	0.879051803	17.01153484	0.41	0.746921705	0.338875902	0.030839585	9.931818417	1.406442289	0.486584054	15.2343074	0.781804312	0.791700569	0.001979251	0.167113798	0.189959317	0.158299431	0.910455655	0.844150732	0.002003002	0.001583401	0.142469488	0.009497966	0.031659886	0.024530359	0.012398883	0.095138331	0.348895949	0.954123734	0.460150426	15.69783316	0.151302928	45.76317782	2.622894925	1.252000661	0.499273207	0.499273207	0.979007288	43.85772593	1.997095199	1.212883052	292.6883
507	2	0	pop_healthy_1000_anth	52.65900907	0.214871429	40	27.14331895	0.849756592	1.140949621	15.6547813	0.41	0.691689802	0.318779472	0.034176485	8.150201693	1.183873651	0.520572722	13.29734046	0.776835462	0.786668822	0.001966672	0.171426724	0.195997414	0.163331178	0.904669145	0.838785631	0.001990272	0.001573338	0.14699806	0.009799871	0.032666236	0.025868479	0.012326578	0.110353595	0.388085876	0.92148209	0.343411953	14.62324249	0.147182125	45.43470071	2.675060258	0.8593778	0.49883257	0.49883257	0.506270052	37.04906627	1.995334088	1.064584397	292.6883
508	2	0	pop_healthy_1000_anth	60.33865257	0.225996019	40	36.58764816	1.079353113	1.062989149	16.33982532	0.41	0.802682506	0.292893449	0.033766936	9.17371345	1.27789682	0.54923387	16.07089058	0.79	0.8	0.002	0.16	0.18	0.15	0.92	0.853	0.002024	0.0016	0.135	0.009	0.03	0.025447698	0.01388993	0.092249444	0.418814781	0.906782806	0.701369378	15.61220077	0.0895162	44.25739619	2.768380825	1.527875352	0.5	0.5	0.60904163	11.60838118	2	1.114616445	292.6883
509	2	0	pop_healthy_1000_anth	66.5184679	0.239299149	40	39.63443194	0.939660753	1.039369501	16.67249291	0.41	0.950110253	0.344109137	0.032536119	9.083062121	1.346901377	0.48845447	24.62863025	0.79	0.8	0.002	0.16	0.18	0.15	0.92	0.853	0.002024	0.0016	0.135	0.009	0.03	0.02666557	0.013103748	0.093771229	0.226835554	0.922794427	0.338124639	15.17030152	0.110756868	45.15629278	2.729704653	0.490321831	0.5	0.5	0.525371038	27.924163	2	0.77333162	292.6883
510	2	0	pop_healthy_1000_anth	56.85636543	0.244620377	40	32.27765632	1.043727349	1.0667983	15.24555472	0.41	0.670793112	0.319293374	0.031415044	7.893725246	1.279588858	0.502583848	18.82462037	0.79	0.8	0.002	0.16	0.18	0.15	0.92	0.853	0.002024	0.0016	0.135	0.009	0.03	0.026560064	0.012902044	0.090749712	0.278905742	0.813093888	0.410885177	15.56905046	0.1528697	44.65994087	2.712796955	0.627391567	0.5	0.5	1.980169469	12.1964696	2	0.718871954	292.6883
511	2	0	pop_healthy_1000_anth	49.30845164	0.209510206	40	52.43390297	1.634231954	1.252156042	15.34115614	0.41	0.822364284	0.416220404	0.027115339	8.122250693	1.405243312	0.503601962	13.68885819	0.79	0.8	0.002	0.16	0.18	0.15	0.92	0.853	0.002024	0.0016	0.135	0.009	0.03	0.024499852	0.007126016	0.089281413	0.314406616	0.941324161	0.319399774	15.36360408	0.127048474	44.97267868	2.338549557	1.141222832	0.5	0.5	0.785016742	23.79350598	2	0.791914715	292.6883
512	2	0	pop_healthy_1000_anth	59.85837505	0.235055455	40	50.93297127	0.993720657	0.984535309	15.95795716	0.41	0.860245938	0.325446047	0.028933429	8.244864542	1.375577808	0.51669248	19.17219959	0.79	0.8	0.002	0.16	0.18	0.15	0.92	0.853	0.002024	0.0016	0.135	0.009	0.03	0.026077489	0.006674508	0.091591587	0.398578566	0.899550334	0.347635026	14.9562884	0.074855383	46.0944297	2.314513913	0.520615368	0.5	0.5	1.761689874	11.90101009	2	1.151479973	292.6883
513	2	0	pop_healthy_1000_anth	64.79820549	0.214205181	40	27.75596617	1.115606219	1.121532269	17.39267989	0.41	0.735522141	0.303403284	0.032803951	10.34440148	1.437963028	0.528283436	18.57167388	0.779658744	0.789527842	0.00197382	0.168976135	0.192566589	0.160472158	0.907957018	0.841834062	0.001997505	0.001579056	0.144424942	0.009628329	0.032094432	0.026654251	0.012621381	0.102499561	0.38663313	0.873006698	0.296586963	14.80647282	0.116746811	43.79094238	2.923870564	0.840469101	0.499082938	0.499082938	1.063767129	18.34839148	1.996334745	1.02744547	292.6883
514	2	0	pop_healthy_1000_anth	66.84192561	0.236251611	40	22.88662197	1.317974302	0.871524961	16.82042974	0.41	0.738990362	0.326683377	0.033100261	9.309703547	1.285903136	0.534913611	23.96217275	0.757219183	0.766804236	0.001917011	0.188453512	0.219834917	0.183195764	0.881824871	0.817605016	0.001940015	0.001533608	0.164876188	0.010991746	0.036639153	0.025532385	0.010628776	0.115611716	0.374335768	0.874407173	0.494537372	15.13848884	0.125776216	45.45062904	2.641133559	0.440277131	0.497093	0.497093	0.704557279	11.38090873	1.988381483	0.872779009	292.6883
515	2	0	pop_healthy_1000_anth	48.8966317	0.202201596	40	44.58309156	0.816032231	1.075750529	15.55060112	0.41	0.625541942	0.334931972	0.032911252	8.121056521	1.301167944	0.505809316	11.20884643	0.79	0.8	0.002	0.16	0.18	0.15	0.92	0.853	0.002024	0.0016	0.135	0.009	0.03	0.026901605	0.010681603	0.088895363	0.393626561	0.963224484	0.256323463	14.88134027	0.084217478	43.09034843	2.651928172	0.972632629	0.5	0.5	0.656832395	12.62323299	2	0.609205519	292.6883
516	2	0	pop_healthy_1000_anth	56.41624824	0.22585162	40	26.42718241	0.90947632	1.496527191	15.80485428	0.41	0.712618943	0.269429278	0.031690785	8.25223459	1.386311467	0.560088189	21.49122664	0.773535266	0.783326851	0.001958317	0.17429127	0.200007779	0.166673149	0.900825879	0.835222255	0.001981817	0.001566654	0.150005834	0.010000389	0.03333463	0.026076079	0.011427209	0.101510322	0.337469453	0.897466796	0.292470377	14.99416351	0.156487088	45.22706698	2.573603799	1.009187658	0.498539909	0.498539909	0.660565804	33.78608133	1.994164398	0.713688934	292.6883
517	2	0	pop_healthy_1000_anth	60.94592406	0.245353331	40	21.73704453	0.728426267	0.881668125	15.76073089	0.41	0.614590406	0.293029382	0.036191296	8.127006908	1.293019121	0.505442069	22.73022806	0.751921547	0.761439541	0.001903599	0.193051822	0.226272551	0.188560459	0.875655472	0.811884911	0.001926442	0.001522879	0.169704413	0.011313628	0.037712092	0.029288362	0.009745061	0.134884882	0.197383321	0.962576569	0.324154172	15.30118612	0.080601274	42.45399533	3.098942103	0.753292895	0.496623206	0.496623206	0.912491324	12.10283702	1.986503839	1.249811933	292.6883
518	2	0	pop_healthy_1000_anth	68.10756723	0.23344196	40	36.31317788	1.559727455	1.287877184	17.08080064	0.41	0.641252475	0.363102879	0.030700419	9.923686476	1.317134732	0.512566789	21.14106505	0.79	0.8	0.002	0.16	0.18	0.15	0.92	0.853	0.002024	0.0016	0.135	0.009	0.03	0.026469951	0.013103253	0.092621845	0.268281275	0.962906693	0.547487875	14.89922271	0.088116419	44.67628007	2.64285334	0.739962061	0.5	0.5	0.706590893	11.4763383	2	0.720607763	292.6883
519	2	0	pop_healthy_1000_anth	47.49708815	0.216771947	40	31.36300045	1.141388182	0.698304494	14.80239378	0.41	0.785972116	0.289388078	0.031079092	7.599790111	1.404079276	0.567227765	15.42402092	0.79	0.8	0.002	0.16	0.18	0.15	0.92	0.853	0.002024	0.0016	0.135	0.009	0.03	0.02399101	0.012081845	0.095078129	0.279945666	0.851670486	0.085719246	14.86814403	0.100446889	43.68132072	3.003397871	0.882651991	0.5	0.5	1.176378896	15.76373488	2	1.068310804	292.6883
520	2	0	pop_healthy_1000_anth	78.09305351	0.242817693	40	23.85377478	1.216682103	1.009391379	17.93354052	0.41	0.699580482	0.314461476	0.034401284	10.57454962	1.223337299	0.546312694	28.13320943	0.761676145	0.771317616	0.001928294	0.184584901	0.214418861	0.178682384	0.887015258	0.822417408	0.001951434	0.001542635	0.160814146	0.010720943	0.035736477	0.029815832	0.011173506	0.124390277	0.361025067	0.922872857	0.390536049	14.86742033	0.143915954	47.17221318	2.963116588	0.55816601	0.497488243	0.497488243	1.619108638	12.86043917	1.989961165	1.276372619	292.6883
521	2	0	pop_healthy_1000_anth	63.39703423	0.245875675	40	47.93262025	0.767841078	1.110736755	16.05745407	0.41	0.922723197	0.371011404	0.033640179	8.561379141	1.362827158	0.455558348	18.70557897	0.79	0.8	0.002	0.16	0.18	0.15	0.92	0.853	0.002024	0.0016	0.135	0.009	0.03	0.026263756	0.008043026	0.103098344	0.42439652	0.85688186	0.234998653	14.91763228	0.171318302	44.23284116	2.501953723	0.810396235	0.5	0.5	1.895451376	27.83051935	2	0.53781089	292.6883
522	2	0	pop_healthy_1000_anth	61.57681397	0.24132597	40	58.79677061	0.795613192	1.00338308	15.97373872	0.41	1.028705269	0.30086321	0.03553594	8.857009486	1.2687321	0.45943393	23.60067407	0.79	0.8	0.002	0.16	0.18	0.15	0.92	0.853	0.002024	0.0016	0.135	0.009	0.03	0.026052686	0.005766057	0.089727366	0.448476763	0.972474331	0.306111483	14.91299446	0.082803986	45.50147837	2.194248777	0.83738298	0.5	0.5	0.985882575	9.660473269	2	0.683073503	292.6883
523	2	0	pop_healthy_1000_anth	59.00791536	0.233633303	40	34.09121438	1.253976798	0.995003269	15.89233684	0.41	0.84933957	0.330524161	0.030458799	8.737309689	1.29219349	0.48855157	19.96612286	0.79	0.8	0.002	0.16	0.18	0.15	0.92	0.853	0.002024	0.0016	0.135	0.009	0.03	0.028252118	0.012481904	0.089332385	0.246825685	0.944207018	0.464614382	15.05169244	0.136239134	46.39537212	2.954548465	1.615149852	0.5	0.5	1.148289762	16.57564118	2	0.687279382	292.6883
524	2	0	pop_healthy_1000_anth	76.34531826	0.236067279	40	26.42804427	0.750899413	0.695245646	17.98346226	0.41	0.701610236	0.322088114	0.033190214	10.75747616	1.263526381	0.507016339	28.35841909	0.773539237	0.783330873	0.001958327	0.174287823	0.200002952	0.166669127	0.900830504	0.835226544	0.001981827	0.001566662	0.150002214	0.010000148	0.033333825	0.027537897	0.012814777	0.101076395	0.352491038	0.951621767	0.46301627	14.82004035	0.132011391	42.26084061	2.734608651	0.575158507	0.498540261	0.498540261	1.389176307	30.06705406	1.994165806	1.143422402	292.6883
525	2	0	pop_healthy_1000_anth	49.41826828	0.221075756	40	58.64794837	1.566849977	0.919225537	14.95110191	0.41	0.879154132	0.266146265	0.033560368	7.301008102	1.326272142	0.530535408	14.2342275	0.79	0.8	0.002	0.16	0.18	0.15	0.92	0.853	0.002024	0.0016	0.135	0.009	0.03	0.027572207	0.004900636	0.08979598	0.373295456	0.89825675	0.283992673	14.99641933	0.139200233	44.46990048	2.248355263	1.427281915	0.5	0.5	3.29437406	15.78911068	2	0.831802997	292.6883
526	2	0	pop_healthy_1000_anth	68.22716814	0.230763256	40	38.20163117	0.969062038	0.909708332	17.19472933	0.41	0.721774075	0.309975588	0.030176482	10.22925298	1.528430346	0.494396096	18.44138433	0.79	0.8	0.002	0.16	0.18	0.15	0.92	0.853	0.002024	0.0016	0.135	0.009	0.03	0.026805783	0.013983627	0.091429871	0.27668983	0.932555398	0.352004921	14.7747629	0.111597062	44.18566661	2.65187471	0.974402544	0.5	0.5	0.691238833	14.65138966	2	0.729935692	292.6883
527	2	0	pop_healthy_1000_anth	65.5247201	0.241596136	40	42.3565554	0.846961432	1.170655722	16.46863466	0.41	0.766149958	0.301013028	0.032824477	8.917097442	1.277099312	0.452207679	19.20675536	0.79	0.8	0.002	0.16	0.18	0.15	0.92	0.853	0.002024	0.0016	0.135	0.009	0.03	0.02427426	0.011776805	0.084115119	0.321326224	0.91194305	0.46220353	15.14709047	0.086395281	44.07549315	2.586079301	1.453410981	0.5	0.5	0.764213831	21.18861116	2	1.434572346	292.6883
528	2	0	pop_healthy_1000_anth	63.57423448	0.240324823	40	35.56552565	0.97014014	1.321429612	16.26452012	0.41	0.635123537	0.283575544	0.033974412	8.469766202	1.302097572	0.5146172	20.82927175	0.79	0.8	0.002	0.16	0.18	0.15	0.92	0.853	0.002024	0.0016	0.135	0.009	0.03	0.02482307	0.012869906	0.081711106	0.32916874	0.914657636	0.344270335	15.05490948	0.078385417	43.61276293	2.74287439	2.762925414	0.5	0.5	2.13278094	15.35095645	2	1.217934561	292.6883
529	2	0	pop_healthy_1000_anth	51.15373608	0.200820563	40	34.04638282	0.912604142	0.835441585	15.96006253	0.41	0.756672503	0.323582273	0.0313387	9.009978893	1.348053946	0.524401507	11.60394063	0.79	0.8	0.002	0.16	0.18	0.15	0.92	0.853	0.002024	0.0016	0.135	0.009	0.03	0.025634252	0.013210802	0.092222931	0.463150703	0.942673775	0.328467578	15.15308447	0.120123766	43.7320634	2.755314778	0.768424228	0.5	0.5	0.832970133	35.96040882	2	0.816212941	292.6883
530	2	0	pop_healthy_1000_anth	55.04546774	0.216414636	40	28.21768962	1.428037385	0.818708758	15.94841284	0.41	0.717538855	0.317373227	0.035527118	8.710982602	1.299891918	0.551065328	14.61964219	0.78178652	0.791682552	0.001979206	0.167129242	0.189980938	0.158317448	0.910434934	0.844131521	0.002002957	0.001583365	0.142485704	0.009499047	0.03166349	0.025848773	0.012048418	0.095191239	0.390850798	0.853279545	0.456747284	14.84019911	0.095100272	43.77475603	2.813071895	0.486303474	0.499271629	0.499271629	0.410895068	20.31882454	1.997088893	0.871211521	292.6883
531	2	0	pop_healthy_1000_anth	54.10975204	0.213532042	40	34.24219739	0.799971451	1.03137493	15.91865042	0.41	0.675833603	0.298455513	0.030334512	8.510715434	1.329608635	0.510251471	16.14276419	0.79	0.8	0.002	0.16	0.18	0.15	0.92	0.853	0.002024	0.0016	0.135	0.009	0.03	0.023379089	0.011990771	0.085427721	0.311403697	0.988520143	0.336924386	14.5895138	0.06680439	44.09960073	2.695155348	0.558819451	0.5	0.5	0.75844032	25.60204675	2	0.971537596	292.6883
532	2	0	pop_healthy_1000_anth	58.7593598	0.204201696	40	51.91720496	0.953482906	0.929120423	16.96324192	0.41	0.76014556	0.359805695	0.03329073	9.990503798	1.361674192	0.522514903	13.86232256	0.79	0.8	0.002	0.16	0.18	0.15	0.92	0.853	0.002024	0.0016	0.135	0.009	0.03	0.025299528	0.007064464	0.091686094	0.418518114	0.894040762	0.235053684	14.86365447	0.151811918	42.38462591	2.024186339	0.866555252	0.5	0.5	1.168518637	23.88833965	2	1.698675497	292.6883
533	2	0	pop_healthy_1000_anth	50.89964937	0.210362979	40	29.13349649	1.051410267	0.836199519	15.55509755	0.41	0.66803645	0.345871862	0.030762688	8.310024098	1.346619446	0.528647708	11.96644539	0.786006863	0.795956317	0.001989891	0.163466014	0.18485242	0.154043683	0.915349765	0.848688423	0.002013769	0.001591913	0.138639315	0.009242621	0.030808737	0.026296692	0.011773407	0.099474516	0.293850921	0.833249614	0.453589971	14.48720254	0.096335476	45.14754678	2.689483734	1.774466644	0.499645889	0.499645889	0.781396235	19.32210951	1.998584711	1.273695163	292.6883
534	2	0	pop_healthy_1000_anth	64.378822	0.23314362	40	33.97636057	1.197445304	1.158990934	16.61727262	0.41	0.786944281	0.352610362	0.030637054	9.501096995	1.271747447	0.480473783	20.73120782	0.79	0.8	0.002	0.16	0.18	0.15	0.92	0.853	0.002024	0.0016	0.135	0.009	0.03	0.025224899	0.013183855	0.093930801	0.27512913	0.872615534	0.300463593	14.8813465	0.135008675	44.94900459	2.588574075	1.517247543	0.5	0.5	1.115165244	15.18561496	2	0.839044243	292.6883
535	2	0	pop_healthy_1000_anth	55.94299804	0.234176447	40	36.13053695	1.051248944	1.050205708	15.45614781	0.41	0.784656314	0.326137724	0.031577891	8.114412543	1.332387135	0.456776859	16.64778277	0.79	0.8	0.002	0.16	0.18	0.15	0.92	0.853	0.002024	0.0016	0.135	0.009	0.03	0.026566545	0.012595495	0.093880673	0.381675006	0.978577834	0.483486257	15.17225161	0.125730507	46.28293966	2.626780545	1.481329363	0.5	0.5	1.092895205	20.15947694	2	0.916932455	292.6883
536	2	0	pop_healthy_1000_anth	52.99156811	0.223327875	40	37.19204753	0.652292112	0.699766172	15.40394358	0.41	0.824791171	0.365231226	0.030044528	8.501592242	1.340597929	0.540647135	14.36628673	0.79	0.8	0.002	0.16	0.18	0.15	0.92	0.853	0.002024	0.0016	0.135	0.009	0.03	0.027552315	0.014024484	0.079973046	0.340164254	0.870958291	0.330366391	15.12742636	0.100516438	45.78769872	2.554046013	0.808965578	0.5	0.5	0.457155281	13.15182389	2	1.168765923	292.6883
537	2	0	pop_healthy_1000_anth	65.18136018	0.226335145	40	34.41399199	1.279519446	1.173664858	16.97015118	0.41	0.679026114	0.360757678	0.031817964	9.438230898	1.347652636	0.494289448	21.94501898	0.79	0.8	0.002	0.16	0.18	0.15	0.92	0.853	0.002024	0.0016	0.135	0.009	0.03	0.025077399	0.013792188	0.091384224	0.443165838	0.906879146	0.308657625	15.06181745	0.092083546	42.96015169	2.87390797	1.137481645	0.5	0.5	1.338110267	6.632450095	2	1.068107319	292.6883
538	2	0	pop_healthy_1000_anth	57.87771632	0.194344183	40	31.31645987	1.025246682	0.922097908	17.25718363	0.41	0.704256218	0.31111177	0.032215533	10.29603266	1.270128372	0.489416598	11.82376947	0.79	0.8	0.002	0.16	0.18	0.15	0.92	0.853	0.002024	0.0016	0.135	0.009	0.03	0.02716434	0.01317747	0.085184648	0.251836953	0.869449149	0.498631126	14.52170988	0.129812011	44.07011453	2.880142986	0.919376919	0.5	0.5	1.57493139	42.59166733	2	1.134287216	292.6883
539	2	0	pop_healthy_1000_anth	48.25749013	0.226688819	40	33.37440896	0.73510764	0.850788116	14.59040393	0.41	0.782571189	0.286851694	0.034378198	7.180392156	1.22407579	0.526329305	13.89526731	0.79	0.8	0.002	0.16	0.18	0.15	0.92	0.853	0.002024	0.0016	0.135	0.009	0.03	0.026268849	0.012211279	0.092505624	0.34960564	0.916320949	0.294274399	14.78826654	0.080095792	44.46513554	2.54677323	1.697874974	0.5	0.5	0.535158507	15.88594943	2	0.999551898	292.6883
540	2	0	pop_healthy_1000_anth	69.79174116	0.209078389	40	38.11146247	1.198480565	1.150892489	18.27037428	0.41	0.894101154	0.260157256	0.032930838	11.75955698	1.262438924	0.510503596	17.85889495	0.79	0.8	0.002	0.16	0.18	0.15	0.92	0.853	0.002024	0.0016	0.135	0.009	0.03	0.02984785	0.014146068	0.083332032	0.406392667	0.827370339	0.542529471	15.23807981	0.145183907	45.36459221	2.836273512	2.251736986	0.5	0.5	0.828051523	9.169025781	2	0.949375124	292.6883
541	2	0	pop_healthy_1000_anth	61.17651221	0.20911892	40	27.83112824	1.015365153	0.703813673	17.10392145	0.41	0.790721567	0.336965583	0.032733761	10.03168639	1.368695651	0.550748198	17.47906119	0.780005116	0.789878598	0.001974696	0.168675487	0.192145682	0.160121402	0.908360388	0.842208056	0.001998393	0.001579757	0.144109261	0.009607284	0.03202428	0.026317419	0.013049361	0.104805547	0.306682725	0.857349862	0.360824719	15.02058452	0.051915281	43.08654999	2.412963778	0.683219826	0.499113654	0.499113654	1.326570252	10.93906377	1.996457509	0.988550207	292.6883
542	2	0	pop_healthy_1000_anth	61.42226984	0.242057221	40	51.65575768	0.983559244	0.849281815	15.92956474	0.41	0.958713812	0.439461972	0.035075939	8.862738681	1.415882834	0.465219838	20.25063534	0.79	0.8	0.002	0.16	0.18	0.15	0.92	0.853	0.002024	0.0016	0.135	0.009	0.03	0.026675404	0.006139702	0.094816273	0.516381482	0.903493782	0.45674368	15.57663841	0.167327754	46.83167795	2.397014873	0.507512905	0.5	0.5	0.988536221	12.19148771	2	1.157770766	292.6883
543	2	0	pop_healthy_1000_anth	46.50395745	0.191550116	40	24.41291362	1.241815843	1.010157052	15.58130205	0.41	0.650127309	0.279481515	0.035802057	8.097127676	1.362478896	0.561721357	13.14514234	0.764252844	0.77392693	0.001934817	0.182348346	0.211287684	0.17607307	0.89001597	0.825199589	0.001958035	0.001547854	0.158465763	0.010564384	0.035214614	0.026025986	0.010156154	0.118144801	0.289026371	1.020558065	0.236320361	15.5351683	0.110621356	43.14430328	2.545753748	1.000380425	0.497716744	0.497716744	1.671234659	13.11563852	1.990874426	0.800560454	292.6883
544	2	0	pop_healthy_1000_anth	64.01267796	0.216750165	40	37.67699341	1.087710527	1.550268517	17.18514811	0.41	0.97876885	0.366160427	0.032868168	10.33710985	1.370361768	0.510704653	19.53240988	0.79	0.8	0.002	0.16	0.18	0.15	0.92	0.853	0.002024	0.0016	0.135	0.009	0.03	0.025332935	0.013234437	0.088270261	0.321606181	0.837532662	0.483932677	15.03585113	0.165449923	45.87087858	2.711184152	3.048272367	0.5	0.5	0.541659447	21.58763038	2	1.087028048	292.6883
545	2	0	pop_healthy_1000_anth	51.0793801	0.206022102	40	31.80700727	1.114244814	0.78340687	15.74584245	0.41	0.788681425	0.285179861	0.032873789	8.557093977	1.25296641	0.511918696	13.88105794	0.79	0.8	0.002	0.16	0.18	0.15	0.92	0.853	0.002024	0.0016	0.135	0.009	0.03	0.026310667	0.012679349	0.081878034	0.323249079	0.929052035	0.30321877	14.99509556	0.134463477	43.18318116	2.99896734	1.444479532	0.5	0.5	0.637628638	26.49908341	2	0.718894934	292.6883
546	2	0	pop_healthy_1000_anth	63.22065904	0.224030809	40	46.51546651	1.204461553	0.980207125	16.7986985	0.41	0.712468145	0.318893548	0.030953813	9.446039634	1.365103168	0.478676407	18.59713822	0.79	0.8	0.002	0.16	0.18	0.15	0.92	0.853	0.002024	0.0016	0.135	0.009	0.03	0.026365764	0.008936685	0.090332258	0.277268918	0.944985261	0.325979526	14.9730512	0.074486949	46.93957018	2.499567849	1.448316791	0.5	0.5	1.285158573	11.47960504	2	0.770540671	292.6883
547	2	0	pop_healthy_1000_anth	49.64339263	0.19847327	40	54.35573388	0.817896993	1.005756684	15.81538304	0.41	0.808613661	0.286893731	0.031644864	9.099493613	1.324476398	0.466973714	10.02560297	0.79	0.8	0.002	0.16	0.18	0.15	0.92	0.853	0.002024	0.0016	0.135	0.009	0.03	0.026792126	0.004734091	0.085837962	0.233264919	0.940482403	0.201946439	15.70021944	0.093457512	43.53323324	2.442254364	0.82599518	0.5	0.5	0.657877791	17.61227651	2	0.956456528	292.6883
548	2	0	pop_healthy_1000_anth	61.28474351	0.225092615	40	50.15765735	0.900310078	0.962019406	16.50044143	0.41	0.814450851	0.318480913	0.031116348	9.770930841	1.390292629	0.454453962	16.99266411	0.79	0.8	0.002	0.16	0.18	0.15	0.92	0.853	0.002024	0.0016	0.135	0.009	0.03	0.027298474	0.007562413	0.081798671	0.490541304	0.926725982	0.555565448	15.34990019	0.084310615	43.7958712	2.314973976	0.847999684	0.5	0.5	1.945314695	13.43199176	2	1.239818338	292.6883
549	2	0	pop_healthy_1000_anth	65.9289874	0.246905595	40	30.73108135	0.945260741	1.073262163	16.34077827	0.41	0.684186324	0.303909825	0.031519223	9.179461791	1.334144727	0.506379752	25.87693278	0.79	0.8	0.002	0.16	0.18	0.15	0.92	0.853	0.002024	0.0016	0.135	0.009	0.03	0.027027722	0.012765339	0.087042104	0.390400214	0.840011129	0.409560912	14.8372006	0.045695409	44.53110512	2.691871172	1.209670171	0.5	0.5	0.532892012	22.35320136	2	0.558973073	292.6883
550	2	0	pop_healthy_1000_anth	50.98708694	0.205600929	40	55.95708726	1.215771031	0.866573189	15.74771563	0.41	0.894999814	0.285890788	0.033193793	8.388708158	1.328845001	0.505609196	10.0912344	0.79	0.8	0.002	0.16	0.18	0.15	0.92	0.853	0.002024	0.0016	0.135	0.009	0.03	0.02515829	0.005053866	0.097052429	0.277692502	0.934255636	0.331778469	15.31692919	0.07613711	46.04160142	2.281758784	1.298534594	0.5	0.5	0.466029066	45.17336432	2	0.846158263	292.6883
551	2	0	pop_healthy_1000_anth	67.7472616	0.248846	40	30.56379216	1.180294207	0.88647799	16.4998707	0.41	0.792871737	0.317761109	0.032731203	9.264558136	1.438640007	0.479068676	24.19584167	0.79	0.8	0.002	0.16	0.18	0.15	0.92	0.853	0.002024	0.0016	0.135	0.009	0.03	0.026163542	0.012542628	0.094297117	0.429123404	0.989890027	0.467077307	15.00369583	0.080704435	44.39533867	2.694324211	0.823148082	0.5	0.5	1.410871068	15.1862372	2	1.675963019	292.6883
552	2	0	pop_healthy_1000_anth	59.29074245	0.219828327	40	45.53628984	1.128745399	1.026541763	16.42296689	0.41	0.81184698	0.37656724	0.030547188	9.17161236	1.367986827	0.488897178	17.02151486	0.79	0.8	0.002	0.16	0.18	0.15	0.92	0.853	0.002024	0.0016	0.135	0.009	0.03	0.024589889	0.009233122	0.09380051	0.268596984	0.883984122	0.394464328	14.90557719	0.157908155	44.94288868	2.452606439	1.128577659	0.5	0.5	1.40950821	14.20550365	2	0.916703429	292.6883
553	2	0	pop_healthy_1000_anth	65.95298984	0.21086647	40	38.34300238	1.564494142	0.944988441	17.68534272	0.41	0.87400944	0.408337828	0.033490099	10.46033839	1.325185268	0.497023547	17.124078	0.79	0.8	0.002	0.16	0.18	0.15	0.92	0.853	0.002024	0.0016	0.135	0.009	0.03	0.025821237	0.013416061	0.086548787	0.338563844	0.970034102	0.563621839	15.12254353	0.144322752	45.65547961	2.693535736	0.741449216	0.5	0.5	0.760678412	7.243681562	2	1.072843119	292.6883
554	2	0	pop_healthy_1000_anth	54.28047591	0.222299225	40	34.02446096	1.204816397	0.855982282	15.62618095	0.41	0.681782268	0.33190386	0.032257423	8.389515202	1.40135246	0.46968059	13.16565046	0.79	0.8	0.002	0.16	0.18	0.15	0.92	0.853	0.002024	0.0016	0.135	0.009	0.03	0.026671065	0.013042045	0.086659992	0.372497316	0.9129034	0.390502199	14.94977957	0.10848758	44.19964705	2.849864501	1.199476691	0.5	0.5	0.867125331	10.49175708	2	1.157141612	292.6883
555	2	0	pop_healthy_1000_anth	51.4319861	0.224733851	40	42.50979544	1.060009979	0.925692695	15.12803082	0.41	0.672502661	0.259128782	0.033196376	8.179963359	1.297491282	0.503891776	13.17749403	0.79	0.8	0.002	0.16	0.18	0.15	0.92	0.853	0.002024	0.0016	0.135	0.009	0.03	0.026982334	0.01149178	0.089940344	0.321745599	0.922321852	0.378182088	15.05134114	0.142392023	44.23656374	2.465779409	0.584867388	0.5	0.5	1.494916605	12.2591324	2	1.840440348	292.6883
556	2	0	pop_healthy_1000_anth	50.98956345	0.192409115	40	36.25203575	1.110396957	0.913549964	16.27900386	0.41	0.899538114	0.300341858	0.032217641	9.185974973	1.338385251	0.498034985	9.152583833	0.79	0.8	0.002	0.16	0.18	0.15	0.92	0.853	0.002024	0.0016	0.135	0.009	0.03	0.027563799	0.012704664	0.093109347	0.336902324	0.875591725	0.614046093	14.96661101	0.041127348	45.533608	2.687064674	0.584295672	0.5	0.5	1.951723654	26.16424779	2	1.005772616	292.6883
557	2	0	pop_healthy_1000_anth	53.929936	0.227113945	40	27.17207821	0.971457247	0.911607664	15.40965984	0.41	0.675399486	0.283425457	0.03214266	8.043855045	1.251740801	0.481129619	20.30918734	0.776967994	0.786803032	0.001967008	0.171311687	0.195836362	0.163196968	0.904823486	0.838928733	0.001990612	0.001573606	0.146877272	0.009791818	0.032639394	0.027802794	0.011776504	0.099088235	0.333311414	0.959982367	0.087712768	15.12514484	0.088376635	45.00755773	2.941844604	0.835790113	0.498844323	0.498844323	1.156190275	34.03196907	1.995381061	0.840061178	292.6883
558	2	0	pop_healthy_1000_anth	62.33091288	0.203547367	40	49.1888676	0.941241457	1.188922436	17.49923243	0.41	0.714181534	0.353487829	0.032794184	9.718703802	1.365612819	0.499832256	15.44214278	0.79	0.8	0.002	0.16	0.18	0.15	0.92	0.853	0.002024	0.0016	0.135	0.009	0.03	0.02459321	0.007442122	0.09974584	0.47943	0.803311806	0.57948039	15.03925242	0.110355814	44.70130398	2.361573114	1.423547938	0.5	0.5	0.363818631	21.73866366	2	0.498081273	292.6883
559	2	0	pop_healthy_1000_anth	57.05283172	0.20508691	40	22.64875626	1.200280967	0.94135287	16.67898552	0.41	0.668690163	0.311133916	0.035565833	9.173410903	1.409388812	0.491836648	13.67338284	0.756123018	0.765694196	0.001914235	0.189404975	0.221166965	0.184305804	0.880548325	0.816421436	0.001937206	0.001531388	0.165875224	0.011058348	0.036861161	0.027249434	0.00995059	0.132052782	0.251934115	0.93984181	0.275744152	15.04630773	0.113631076	43.50486826	2.715783761	0.856875869	0.496995792	0.496995792	0.414148302	6.749997224	1.987992969	0.775066346	292.6883
560	2	0	pop_healthy_1000_anth	64.72744987	0.240007298	40	20.62782778	0.80331792	1.102106724	16.42222602	0.41	0.607236116	0.295442584	0.034338436	8.85128074	1.386410286	0.5333092	24.68497458	0.746809906	0.756263196	0.001890658	0.197488689	0.232484164	0.193736804	0.869702676	0.806365633	0.001913346	0.001512526	0.174363123	0.011624208	0.038747361	0.029039318	0.009447514	0.137882547	0.28007827	0.940429649	0.423721374	14.80957346	0.151204326	45.08592146	2.848487799	0.470778673	0.496169906	0.496169906	4.533698216	10.9902922	1.984692119	1.383956518	292.6883
561	2	0	pop_healthy_1000_anth	61.79487849	0.19873766	40	37.61408488	0.919678652	1.348312167	17.63340389	0.41	0.751514329	0.338708584	0.03050336	10.69008332	1.420984989	0.526421163	14.77739157	0.79	0.8	0.002	0.16	0.18	0.15	0.92	0.853	0.002024	0.0016	0.135	0.009	0.03	0.026237903	0.014056629	0.08998531	0.362795186	0.794836726	0.453430073	15.07900012	0.130930145	43.65422148	2.678970485	1.652251207	0.5	0.5	0.336932479	12.39568435	2	0.740883494	292.6883
562	2	0	pop_healthy_1000_anth	53.09804405	0.194582896	40	20.18272489	0.957843923	1.184924093	16.51912083	0.41	0.679430446	0.293809089	0.033170387	8.834554098	1.27728785	0.508961853	13.60515987	0.744758724	0.75418605	0.001885465	0.1992691	0.234976741	0.19581395	0.867313957	0.804150875	0.001908091	0.001508372	0.176232555	0.011748837	0.03916279	0.027738573	0.008823185	0.129186155	0.332212096	0.920589128	0.443541013	14.96334858	0.104712635	43.26168309	2.81340284	1.788376507	0.495988007	0.495988007	0.831200109	12.94069222	1.983965117	1.154225903	292.6883
563	2	0	pop_healthy_1000_anth	54.37013624	0.236563683	40	31.3967295	0.775674162	0.939353136	15.16024341	0.41	0.674634617	0.296953194	0.033955656	7.828065144	1.413000538	0.517414916	16.4903237	0.79	0.8	0.002	0.16	0.18	0.15	0.92	0.853	0.002024	0.0016	0.135	0.009	0.03	0.027056955	0.013103079	0.092376745	0.044165497	0.896687633	0.443716227	14.9050148	0.109333813	45.42136349	3.015326125	0.64671864	0.5	0.5	3.947944241	12.6121109	2	0.545244216	292.6883
564	2	0	pop_healthy_1000_anth	60.89700493	0.238602106	40	37.2698525	0.951634997	1.067032025	15.97573436	0.41	0.728028556	0.318400567	0.032859809	8.775873238	1.32872513	0.524527415	20.8905467	0.79	0.8	0.002	0.16	0.18	0.15	0.92	0.853	0.002024	0.0016	0.135	0.009	0.03	0.02641449	0.012809397	0.093982651	0.259319467	0.853343973	0.34747671	14.90575828	0.12022432	46.16709289	2.719210648	1.772948783	0.5	0.5	0.903530271	5.991451321	2	0.940848519	292.6883
565	2	0	pop_healthy_1000_anth	52.37476267	0.218553752	40	59.75261206	0.955594344	1.386982245	15.4803901	0.41	0.777984959	0.295844018	0.031106639	7.781793501	1.258849375	0.535423828	16.12182705	0.79	0.8	0.002	0.16	0.18	0.15	0.92	0.853	0.002024	0.0016	0.135	0.009	0.03	0.025995863	0.003660086	0.102268373	0.424892591	0.960848432	0.335130205	15.32875419	0.157084665	42.98211607	2.117426842	1.282908945	0.5	0.5	0.542840583	17.8087168	2	0.593350639	292.6883
566	2	0	pop_healthy_1000_anth	59.58629148	0.219905154	40	41.61236036	1.040902688	1.152409277	16.46097194	0.41	1.002866677	0.317987928	0.033229831	9.293076457	1.531788698	0.497638631	14.98494849	0.79	0.8	0.002	0.16	0.18	0.15	0.92	0.853	0.002024	0.0016	0.135	0.009	0.03	0.027268623	0.012517619	0.095160468	0.367450277	1.006627905	0.249608243	14.88589708	0.104618105	44.30540739	2.760029466	0.556166473	0.5	0.5	1.176114105	27.06625762	2	0.829185378	292.6883
567	2	0	pop_healthy_1000_anth	51.97532567	0.241166258	40	43.68027355	1.331269354	0.868215575	14.68048275	0.41	0.541228527	0.263584066	0.032011357	7.550224077	1.359106425	0.521786781	14.42394558	0.79	0.8	0.002	0.16	0.18	0.15	0.92	0.853	0.002024	0.0016	0.135	0.009	0.03	0.026066456	0.009584013	0.090528715	0.236978235	0.916241398	0.342398208	15.04545923	0.10067862	46.32311204	2.589361341	2.221250774	0.5	0.5	2.076185501	9.790526678	2	0.776997513	292.6883
568	2	0	pop_healthy_1000_anth	36.93328164	0.201181568	40	22.59388805	1.028665311	1.141287024	13.54923749	0.41	0.579967437	0.277397637	0.034260974	6.050785819	1.270344321	0.520401527	9.696690633	0.755870167	0.765438144	0.001913595	0.189624448	0.221474227	0.184561856	0.880253866	0.816148421	0.001936559	0.001530876	0.16610567	0.011073711	0.036912371	0.028105055	0.008482043	0.122851849	0.344088422	0.995534115	0.290815415	14.74702675	0.147163841	44.98460722	2.704328332	0.987142675	0.496973369	0.496973369	1.871052237	13.85562814	1.98790335	0.755970515	292.6883
569	2	0	pop_healthy_1000_anth	63.76514979	0.237679514	40	51.92547038	1.00172954	0.98915399	16.37931807	0.41	0.926124383	0.31846198	0.032828978	9.755727784	1.377123383	0.495852021	21.65001209	0.79	0.8	0.002	0.16	0.18	0.15	0.92	0.853	0.002024	0.0016	0.135	0.009	0.03	0.023916797	0.006796229	0.087966822	0.289851735	0.859999886	0.420063495	14.96578444	0.091650618	45.81073958	2.22280723	0.593042746	0.5	0.5	0.910215406	26.52446905	2	1.14325429	292.6883
570	2	0	pop_healthy_1000_anth	50.25042888	0.234859896	40	42.23472881	1.123273381	1.154558091	14.62734329	0.41	0.692297712	0.443824288	0.032011532	6.889360641	1.343079184	0.478280383	14.25341907	0.79	0.8	0.002	0.16	0.18	0.15	0.92	0.853	0.002024	0.0016	0.135	0.009	0.03	0.026211962	0.010242174	0.094079331	0.297871244	0.936188461	0.397267936	15.17283253	0.106332244	43.09190199	2.541576759	1.916747176	0.5	0.5	1.643269582	21.68885783	2	1.706779399	292.6883
571	2	0	pop_healthy_1000_anth	53.01439838	0.198622629	40	36.74436903	0.777897965	1.116879384	16.33738544	0.41	0.688029086	0.288111117	0.029410232	9.128877391	1.36758682	0.49980849	13.00010775	0.79	0.8	0.002	0.16	0.18	0.15	0.92	0.853	0.002024	0.0016	0.135	0.009	0.03	0.024445097	0.013553602	0.093570269	0.220188265	0.86782548	0.623882723	15.08078552	0.156431047	45.4176556	2.700025766	1.077205355	0.5	0.5	0.687424296	44.53383364	2	0.602995283	292.6883
572	2	0	pop_healthy_1000_anth	57.00248418	0.233046191	40	39.26117766	0.903175825	0.850664459	15.63960883	0.41	0.829712284	0.325091207	0.031895443	8.536534443	1.33971406	0.547018174	18.55177311	0.79	0.8	0.002	0.16	0.18	0.15	0.92	0.853	0.002024	0.0016	0.135	0.009	0.03	0.025489132	0.012343583	0.08129146	0.403162064	0.955506467	0.265608446	14.87349253	0.151672682	44.37001332	2.761025949	0.909898523	0.5	0.5	1.678186629	13.70110747	2	1.490996522	292.6883
573	2	0	pop_healthy_1000_anth	50.12271074	0.193073008	40	39.76031498	1.017186892	0.956554581	16.11226122	0.41	0.87617263	0.208654548	0.031696608	8.426539729	1.290941925	0.484650519	11.28167272	0.79	0.8	0.002	0.16	0.18	0.15	0.92	0.853	0.002024	0.0016	0.135	0.009	0.03	0.026701928	0.012530842	0.089907244	0.562115925	0.961004354	0.381883897	15.13474855	0.125308146	43.49175383	2.379633069	0.92763526	0.5	0.5	0.67311512	27.12107952	2	0.589171504	292.6883
574	2	0	pop_healthy_1000_anth	70.92313276	0.230915789	40	21.92516044	0.742625952	0.769609817	17.52536779	0.41	0.671303173	0.278996434	0.03100888	10.31746754	1.38268427	0.540269355	27.03231417	0.752788448	0.762317415	0.001905794	0.192299358	0.225219102	0.187682585	0.876665028	0.812820944	0.001928663	0.001524635	0.168914326	0.011260955	0.037536517	0.027853028	0.010759914	0.132544848	0.350765378	0.946620397	0.380556367	15.3539696	0.107270031	44.33826057	2.795252127	0.929812802	0.496700082	0.496700082	2.339024045	20.32992423	1.986811095	0.993809992	292.6883
575	2	0	pop_healthy_1000_anth	58.27870775	0.236181246	40	36.50245135	1.26135449	0.840921809	15.70841086	0.41	0.703002929	0.289107234	0.033473774	8.454870525	1.342565509	0.496047319	14.4696837	0.79	0.8	0.002	0.16	0.18	0.15	0.92	0.853	0.002024	0.0016	0.135	0.009	0.03	0.024477024	0.012638402	0.084279135	0.358397459	0.86618891	0.275488079	14.75919725	0.155086487	44.86145682	2.721734719	1.15276637	0.5	0.5	0.609103391	25.08097133	2	1.385731644	292.6883
576	2	0	pop_healthy_1000_anth	46.7465898	0.193270418	40	32.8610579	0.963762931	0.988100316	15.55221583	0.41	0.839250982	0.360696308	0.032079947	8.194621507	1.372017476	0.49344161	9.066112631	0.79	0.8	0.002	0.16	0.18	0.15	0.92	0.853	0.002024	0.0016	0.135	0.009	0.03	0.027331857	0.013066173	0.089020355	0.198000277	0.867951103	0.454519474	14.81691235	0.088080318	43.85309877	2.865257566	0.751440713	0.5	0.5	1.051950867	35.90050613	2	0.709251404	292.6883
577	2	0	pop_healthy_1000_anth	59.08333018	0.227131082	40	53.76612715	0.91451806	0.858150229	16.12850816	0.41	0.589149946	0.398665397	0.033184058	8.305349327	1.251115117	0.517972773	19.88156907	0.79	0.8	0.002	0.16	0.18	0.15	0.92	0.853	0.002024	0.0016	0.135	0.009	0.03	0.025427305	0.005834758	0.084015834	0.283993138	0.877624431	0.438108359	15.22822267	0.153172653	47.0021482	2.278336739	0.911992273	0.5	0.5	0.785004229	6.366028935	2	1.230334943	292.6883
578	2	0	pop_healthy_1000_anth	52.93822079	0.206204441	40	31.84244298	0.862021211	1.435093846	16.02269861	0.41	0.714570053	0.332815438	0.02955589	8.749122444	1.221470799	0.546295505	16.87473932	0.79	0.8	0.002	0.16	0.18	0.15	0.92	0.853	0.002024	0.0016	0.135	0.009	0.03	0.02609495	0.012588459	0.087894489	0.314913182	0.920335737	0.345661567	14.7927681	0.140088269	44.11962236	2.706348443	0.510267356	0.5	0.5	1.240013858	18.19196456	2	1.18849281	292.6883
579	2	0	pop_healthy_1000_anth	61.31325939	0.244657555	40	39.14678751	1.020047431	1.162116562	15.83061861	0.41	0.707110391	0.224290245	0.033743434	9.092756821	1.428298901	0.498956225	19.43116653	0.79	0.8	0.002	0.16	0.18	0.15	0.92	0.853	0.002024	0.0016	0.135	0.009	0.03	0.026634284	0.012527442	0.090168704	0.272409707	0.888638426	0.36438338	14.88848725	0.136706327	44.6098713	2.798034562	1.442012154	0.5	0.5	1.614929256	23.87600464	2	1.303916827	292.6883
580	2	0	pop_healthy_1000_anth	55.14163657	0.213927748	40	35.45017774	1.181584765	1.029738851	16.05485051	0.41	0.722130382	0.366614266	0.032992248	9.040437629	1.393238034	0.487807051	8.631098197	0.79	0.8	0.002	0.16	0.18	0.15	0.92	0.853	0.002024	0.0016	0.135	0.009	0.03	0.023249668	0.012351208	0.093586987	0.479331867	0.89331878	0.530496864	14.84080591	0.131190698	46.02094402	2.788924888	0.709211643	0.5	0.5	1.461524791	35.65180264	2	0.898799274	292.6883
581	2	0	pop_healthy_1000_anth	52.76955682	0.216656054	40	31.23020385	0.803202478	0.823949682	15.60652846	0.41	0.81518104	0.284162086	0.030574159	8.334391932	1.343957203	0.502834118	12.08418589	0.79	0.8	0.002	0.16	0.18	0.15	0.92	0.853	0.002024	0.0016	0.135	0.009	0.03	0.024590063	0.012639964	0.096041014	0.448159984	0.902598369	0.369813672	14.86593441	0.103607406	46.31369943	2.555684747	2.429890494	0.5	0.5	0.578376391	15.49896491	2	1.009973223	292.6883
582	2	0	pop_healthy_1000_anth	53.25922331	0.235808188	40	36.49784225	1.286038474	1.207808774	15.02858091	0.41	0.646213624	0.299788057	0.031630025	7.811612266	1.224920182	0.499011256	12.01634654	0.79	0.8	0.002	0.16	0.18	0.15	0.92	0.853	0.002024	0.0016	0.135	0.009	0.03	0.027637205	0.012493051	0.096560087	0.407623861	0.917130208	0.481631969	14.54141374	0.095393197	45.30259869	2.631203915	0.822600902	0.5	0.5	0.466625539	14.21376012	2	0.783155251	292.6883
583	2	0	pop_healthy_1000_anth	54.08461057	0.227983695	40	24.61909	1.226476448	0.954418276	15.40227805	0.41	0.70509303	0.298858399	0.031330772	7.826588681	1.396931702	0.535007719	15.35817357	0.765202973	0.774889087	0.001937223	0.18152364	0.210133096	0.175110913	0.89112245	0.826225489	0.001960469	0.001549778	0.157599822	0.010506655	0.035022183	0.028545694	0.010261632	0.121185082	0.243246431	1.054496065	0.533887584	15.10201539	0.129293344	44.48049626	2.944887129	0.889169398	0.497801001	0.497801001	1.378391751	16.17092908	1.99121118	1.033486009	292.6883
584	2	0	pop_healthy_1000_anth	56.52795434	0.225202141	40	39.1572551	0.933294386	0.795530349	15.84329021	0.41	0.765167747	0.329042936	0.032895445	8.419116386	1.481635418	0.521561982	16.67654514	0.79	0.8	0.002	0.16	0.18	0.15	0.92	0.853	0.002024	0.0016	0.135	0.009	0.03	0.026034684	0.012777447	0.097917322	0.479320799	0.988089344	0.257945847	15.13919846	0.149842737	43.95255421	2.758264586	0.738823963	0.5	0.5	0.666039911	11.9026264	2	0.665994274	292.6883
585	2	0	pop_healthy_1000_anth	50.48023942	0.235974392	40	39.51776299	1.188143758	0.830624531	14.62609079	0.41	0.542563039	0.283736688	0.032521922	7.235946792	1.233844172	0.496276509	15.27866647	0.79	0.8	0.002	0.16	0.18	0.15	0.92	0.853	0.002024	0.0016	0.135	0.009	0.03	0.027363081	0.012049437	0.088888236	0.260203136	0.864128167	0.356877382	15.51989261	0.147944978	45.96592829	2.790794797	1.411480421	0.5	0.5	0.493004703	26.08529724	2	0.914573595	292.6883
586	2	0	pop_healthy_1000_anth	55.07408757	0.197748931	40	37.19941701	0.878187357	1.137290862	16.68847235	0.41	0.960053751	0.338448331	0.033310036	9.568587244	1.390226627	0.462257749	10.32791425	0.79	0.8	0.002	0.16	0.18	0.15	0.92	0.853	0.002024	0.0016	0.135	0.009	0.03	0.026272289	0.013722401	0.09511393	0.219001527	0.927794797	0.437586276	14.88397702	0.115056049	44.58165516	2.635121879	1.168725618	0.5	0.5	1.146432673	7.566379323	2	1.00948965	292.6883
587	2	0	pop_healthy_1000_anth	56.17807497	0.214189184	40	43.17188204	1.368102245	1.260335174	16.1951382	0.41	0.934797618	0.281772312	0.030882925	8.939158019	1.525445132	0.510661509	13.86060855	0.79	0.8	0.002	0.16	0.18	0.15	0.92	0.853	0.002024	0.0016	0.135	0.009	0.03	0.025220737	0.010418096	0.087347345	0.299233307	0.891241813	0.21245205	14.68089731	0.137164152	43.20564889	2.546946774	1.647517397	0.5	0.5	0.370641264	10.90467118	2	1.549736742	292.6883
588	2	0	pop_healthy_1000_anth	55.15482957	0.232589606	40	34.35518109	1.225734161	1.436424817	15.39914548	0.41	0.704873682	0.362537561	0.0310521	7.923559444	1.31347441	0.532310755	17.94605488	0.79	0.8	0.002	0.16	0.18	0.15	0.92	0.853	0.002024	0.0016	0.135	0.009	0.03	0.024794294	0.012458413	0.087940456	0.367499818	0.974363051	0.393493411	14.77158517	0.096852706	43.24829858	2.695271961	1.499445204	0.5	0.5	1.642799463	9.845051609	2	1.150484979	292.6883
589	2	0	pop_healthy_1000_anth	53.70219649	0.249045968	40	20.0046091	0.819234969	0.783196187	14.68440206	0.41	0.644841231	0.261814898	0.032847176	6.992665894	1.395602886	0.516927162	22.48175386	0.743937907	0.753354842	0.001883387	0.199981564	0.235974189	0.196645158	0.866358069	0.803264601	0.001905988	0.00150671	0.176980642	0.011798709	0.039329032	0.02906598	0.008716823	0.150375253	0.343895153	1.009325809	0.432412746	15.01385368	0.172705781	44.72711859	2.804649425	2.061876434	0.495915217	0.495915217	0.620979864	16.23215559	1.983674195	1.4267306	292.6883
590	2	0	pop_healthy_1000_anth	48.51998922	0.190068097	40	54.72429454	0.981932886	1.04222769	15.97738627	0.41	0.973072068	0.315829019	0.031182298	8.649894138	1.287906738	0.490307362	11.0179645	0.79	0.8	0.002	0.16	0.18	0.15	0.92	0.853	0.002024	0.0016	0.135	0.009	0.03	0.025257421	0.006619695	0.088144128	0.291114525	0.854937317	0.238358114	14.64563941	0.059863627	43.72271557	2.306250361	1.850141225	0.5	0.5	1.012699992	20.63454297	2	0.81685481	292.6883
591	2	0	pop_healthy_1000_anth	54.88674796	0.216111287	40	21.74027138	1.393928825	0.935378518	15.93657626	0.41	0.704067143	0.2809635	0.032571549	8.319002814	1.380357297	0.510318283	15.30379814	0.751936417	0.7614546	0.001903636	0.193038914	0.22625448	0.1885454	0.87567279	0.811900967	0.00192648	0.001522909	0.16969086	0.011312724	0.03770908	0.03068783	0.008641126	0.125067947	0.391015941	0.919706717	0.462776361	15.31976858	0.151197826	45.16101621	2.911093173	0.545358168	0.496624524	0.496624524	0.507092813	5.431601651	1.98650911	0.950081347	292.6883
592	2	0	pop_healthy_1000_anth	52.3870632	0.190408117	40	32.03992382	1.027006269	1.322870437	16.58705547	0.41	0.747880144	0.375947266	0.033049141	9.19613465	1.33732045	0.514329067	12.72863525	0.79	0.8	0.002	0.16	0.18	0.15	0.92	0.853	0.002024	0.0016	0.135	0.009	0.03	0.024536322	0.012787285	0.089428756	0.268434157	0.886262506	0.422547061	14.99369193	0.148463204	44.45898506	2.563186812	3.639570415	0.5	0.5	0.71060722	8.884014492	2	1.553079447	292.6883
593	2	0	pop_healthy_1000_anth	55.50551328	0.23071704	40	41.81194455	1.046851869	1.117282712	15.51058672	0.41	0.793751812	0.281508122	0.032162647	8.18616349	1.445666419	0.484587877	15.57745332	0.79	0.8	0.002	0.16	0.18	0.15	0.92	0.853	0.002024	0.0016	0.135	0.009	0.03	0.026183532	0.010766231	0.088421061	0.253475623	0.883802104	0.328713349	14.7466921	0.111241904	43.89914052	2.563309144	1.400880337	0.5	0.5	0.829676709	10.19213144	2	1.353627172	292.6883
594	2	0	pop_healthy_1000_anth	61.64582569	0.207449987	40	21.93748137	1.05951707	0.935889995	17.23832765	0.41	0.700475687	0.329233504	0.032036136	9.905544825	1.378390906	0.5032272	18.3876475	0.752845227	0.762374913	0.001905937	0.192250075	0.225150104	0.187625087	0.87673115	0.812882251	0.001928809	0.00152475	0.168862578	0.011257505	0.037525017	0.025297595	0.009775034	0.134477102	0.441302007	1.008641226	0.445808685	15.24831058	0.100725172	45.78353504	2.7740686	0.674843614	0.496705117	0.496705117	1.044641473	6.809438028	1.98683122	0.860463289	292.6883
595	2	0	pop_healthy_1000_anth	63.68292307	0.244721975	40	58.61900037	0.872008242	1.084574077	16.13150956	0.41	0.979202232	0.353173023	0.032663222	9.16031804	1.221755462	0.4669811	24.57130688	0.79	0.8	0.002	0.16	0.18	0.15	0.92	0.853	0.002024	0.0016	0.135	0.009	0.03	0.026940577	0.005714305	0.096185085	0.492177622	0.90837934	0.501601875	14.9648535	0.131787073	45.23043088	2.203914439	0.489722458	0.5	0.5	0.716670643	6.98542207	2	1.12781072	292.6883
596	2	0	pop_healthy_1000_anth	47.61613659	0.194650948	40	23.81491617	1.235125537	0.902011919	15.64043457	0.41	0.685356899	0.284713294	0.031649408	8.099238393	1.288367323	0.478375183	11.71162472	0.761497072	0.771136275	0.001927841	0.184740335	0.214636469	0.178863725	0.886806717	0.822224054	0.001950975	0.001542273	0.160977352	0.010731823	0.035772745	0.028570791	0.010003477	0.111066797	0.228318644	0.942922375	0.308975792	15.05512301	0.085024172	43.68457751	3.024976791	1.001366563	0.497472362	0.497472362	1.24419373	18.99303875	1.989897696	1.206147855	292.6883
597	2	0	pop_healthy_1000_anth	59.49778743	0.246800626	40	56.85782194	0.727269754	1.007531319	15.5266327	0.41	0.677876427	0.348142425	0.034413538	8.918114245	1.293020362	0.472200714	17.98431497	0.79	0.8	0.002	0.16	0.18	0.15	0.92	0.853	0.002024	0.0016	0.135	0.009	0.03	0.027350111	0.004571124	0.085136136	0.29943902	0.961364111	0.389110241	15.13228136	0.149519453	44.33831543	2.012297514	2.030860579	0.5	0.5	1.254659544	4.05430919	2	0.833881546	292.6883
598	2	0	pop_healthy_1000_anth	52.16190945	0.235960566	40	47.96389009	1.284939614	1.157614316	14.86815314	0.41	0.946150987	0.439445103	0.033511214	7.277415518	1.349349349	0.485305805	16.21011139	0.79	0.8	0.002	0.16	0.18	0.15	0.92	0.853	0.002024	0.0016	0.135	0.009	0.03	0.027245532	0.008470057	0.092798629	0.389795604	0.830185738	0.511560232	14.6728882	0.115347722	44.35377044	2.506646823	2.562479511	0.5	0.5	1.625245341	16.10809077	2	0.83569241	292.6883
599	2	0	pop_healthy_1000_anth	53.16464602	0.22934269	40	59.13769988	1.143072541	1.470774588	15.22541055	0.41	0.773069832	0.342635526	0.031866579	7.793821667	1.284166828	0.524203891	17.03624668	0.79	0.8	0.002	0.16	0.18	0.15	0.92	0.853	0.002024	0.0016	0.135	0.009	0.03	0.027050631	0.003724139	0.089863438	0.3429395	0.963643153	0.440985801	14.9724873	0.130077283	44.74625621	2.028013284	0.917051574	0.5	0.5	1.016872402	12.22309719	2	0.894374102	292.6883
600	2	0	pop_healthy_1000_anth	51.47561012	0.200591589	40	30.4854847	1.232770275	1.119488521	16.01933161	0.41	0.689320951	0.320935691	0.031765852	8.986224017	1.432896662	0.531509552	13.42089335	0.79	0.8	0.002	0.16	0.18	0.15	0.92	0.853	0.002024	0.0016	0.135	0.009	0.03	0.028628574	0.013088771	0.087429305	0.21774179	0.847121194	0.42478827	14.52015602	0.085305981	44.40932759	2.927195586	1.011609813	0.5	0.5	0.846409663	12.71192509	2	1.654568413	292.6883
601	2	0	pop_healthy_1000_anth	65.30355483	0.234616332	40	43.36952378	0.91859112	1.254148327	16.68358164	0.41	1.118034705	0.251393703	0.029723553	9.308280044	1.417509162	0.506067111	18.3758916	0.79	0.8	0.002	0.16	0.18	0.15	0.92	0.853	0.002024	0.0016	0.135	0.009	0.03	0.024821901	0.010456637	0.088592157	0.32518031	0.900864908	0.693722775	15.31183075	0.118114751	44.74091478	2.604509934	0.580296431	0.5	0.5	0.974979182	12.2177755	2	1.268733067	292.6883
602	2	0	pop_healthy_1000_anth	73.49819181	0.248766725	40	38.84675517	0.868995519	0.724222766	17.1886664	0.41	0.867998701	0.383719636	0.031831846	10.27223721	1.271249328	0.519612322	27.21460171	0.79	0.8	0.002	0.16	0.18	0.15	0.92	0.853	0.002024	0.0016	0.135	0.009	0.03	0.0257878	0.013072753	0.092257345	0.480560107	0.91339907	0.209854989	14.69267141	0.107202047	43.79115056	2.796233065	1.083505314	0.5	0.5	0.900678425	17.70187689	2	0.67878677	292.6883
603	2	0	pop_healthy_1000_anth	54.07226013	0.230344127	40	57.25277904	1.008870061	1.029703586	15.32140842	0.41	0.632003648	0.384982943	0.031879253	8.247695377	1.406118308	0.421381534	15.26607872	0.79	0.8	0.002	0.16	0.18	0.15	0.92	0.853	0.002024	0.0016	0.135	0.009	0.03	0.026814851	0.005807138	0.091013612	0.357466504	0.967880376	0.478146127	15.30214881	0.135388063	44.58320951	2.089893834	1.087908678	0.5	0.5	0.24943455	17.88819561	2	0.916641036	292.6883
604	2	0	pop_healthy_1000_anth	49.09946671	0.249856263	40	26.40585697	1.099329117	1.015544697	14.01823278	0.41	0.598230821	0.285795386	0.033380411	6.519113265	1.292349962	0.507418199	21.39340828	0.773436991	0.783227333	0.001958068	0.174376572	0.200127201	0.166772667	0.900711432	0.835116143	0.001981565	0.001566455	0.150095401	0.01000636	0.033354533	0.027575414	0.010408929	0.107482029	0.238566946	0.856772082	0.360224073	15.0788525	0.070594274	44.38913926	2.741602368	0.981115818	0.498531194	0.498531194	1.689610966	15.53697283	1.994129566	1.073508918	292.6883
605	2	0	pop_healthy_1000_anth	64.15635113	0.226763247	40	57.16177409	1.017788208	0.823319118	16.82029059	0.41	0.684456319	0.326569776	0.031450182	10.51948499	1.288434199	0.504334524	20.63708769	0.79	0.8	0.002	0.16	0.18	0.15	0.92	0.853	0.002024	0.0016	0.135	0.009	0.03	0.024949431	0.005490177	0.091882707	0.301214992	0.977044084	0.154917761	15.23927211	0.091936865	45.15706363	2.26501139	0.48225222	0.5	0.5	2.57370009	17.92491188	2	1.005246206	292.6883
606	2	0	pop_healthy_1000_anth	55.60871148	0.201740374	40	20.87631781	0.837310227	0.979170936	16.60255796	0.41	0.665298005	0.304009017	0.034693881	8.981307676	1.45072071	0.547364033	14.07548754	0.747955031	0.757422816	0.001893557	0.196494729	0.23109262	0.192577184	0.871036239	0.807602078	0.00191628	0.001514846	0.173319465	0.011554631	0.038515437	0.028545914	0.009862966	0.12741334	0.237110288	1.059042203	0.430546559	14.5107622	0.141228662	44.15034847	2.935463698	1.466282769	0.496271455	0.496271455	0.913181676	14.98592854	1.985097986	0.82062152	292.6883
607	2	0	pop_healthy_1000_anth	57.39450034	0.235341427	40	28.87197134	1.013297903	1.219588915	15.61658064	0.41	0.692257575	0.285649496	0.03237625	8.369183881	1.374753091	0.520114439	16.07978868	0.784801668	0.794735866	0.00198684	0.164512115	0.186316961	0.155264134	0.913946246	0.847387117	0.002010682	0.001589472	0.13973772	0.009315848	0.031052827	0.02783707	0.011069948	0.100898811	0.203575087	0.904715102	0.454120655	14.51185195	0.050354284	44.90853997	2.653839117	1.3339753	0.499539012	0.499539012	3.209156183	21.56466232	1.998157553	1.048458082	292.6883
608	2	0	pop_healthy_1000_anth	75.38094811	0.216293954	40	33.99643429	1.441828479	0.819669998	18.66846491	0.41	0.874872386	0.374877291	0.028689452	11.92266823	1.160080701	0.523229279	24.81988639	0.79	0.8	0.002	0.16	0.18	0.15	0.92	0.853	0.002024	0.0016	0.135	0.009	0.03	0.026015106	0.015486802	0.086699858	0.392263304	0.904722959	0.412209892	15.11623011	0.152476097	42.19151366	2.549112729	0.74880259	0.5	0.5	1.719300372	22.34677539	2	1.404863902	292.6883
609	2	0	pop_healthy_1000_anth	49.61718689	0.203518938	40	50.85495885	0.995221883	0.984876822	15.61398131	0.41	0.921799598	0.35945501	0.03209074	8.978133825	1.345171491	0.481744934	9.484367027	0.79	0.8	0.002	0.16	0.18	0.15	0.92	0.853	0.002024	0.0016	0.135	0.009	0.03	0.024657951	0.005229565	0.083608296	0.410265418	0.885493925	0.405550166	15.03189746	0.146934651	46.65476513	2.32280249	0.854956515	0.5	0.5	1.045803662	16.38675974	2	0.949166096	292.6883
610	2	0	pop_healthy_1000_anth	55.31291806	0.213428648	40	47.75994926	1.335184696	1.184179979	16.09855621	0.41	0.742598663	0.42455481	0.033463635	8.788243891	1.390068111	0.531337448	16.05163166	0.79	0.8	0.002	0.16	0.18	0.15	0.92	0.853	0.002024	0.0016	0.135	0.009	0.03	0.025014578	0.008784019	0.092719302	0.419023973	0.935286266	0.259809727	14.99090371	0.10024372	43.81601962	2.219876683	1.012277195	0.5	0.5	1.248288888	35.42184988	2	0.889312437	292.6883
611	2	0	pop_healthy_1000_anth	54.59756697	0.198173282	40	51.14116121	0.852477915	1.248645333	16.59831848	0.41	0.887790618	0.266644978	0.028672676	9.702848849	1.29858607	0.487208438	8.568622652	0.79	0.8	0.002	0.16	0.18	0.15	0.92	0.853	0.002024	0.0016	0.135	0.009	0.03	0.021715966	0.00682805	0.095122615	0.373921345	0.913725455	0.51375754	15.27347157	0.12922913	43.52878973	2.367632887	0.608060454	0.5	0.5	0.542490064	6.004248804	2	0.7480057	292.6883
612	2	0	pop_healthy_1000_anth	56.68686484	0.240256729	40	49.13734018	0.951855311	1.371085134	15.36043233	0.41	0.849986193	0.346241752	0.029902744	7.899598497	1.333744697	0.488120024	15.32188633	0.79	0.8	0.002	0.16	0.18	0.15	0.92	0.853	0.002024	0.0016	0.135	0.009	0.03	0.02376023	0.007353757	0.086074648	0.383344115	0.847363586	0.537749268	14.98360092	0.107128903	44.09761285	2.359809575	0.707332534	0.5	0.5	1.030982278	14.22973951	2	1.029626924	292.6883
613	2	0	pop_healthy_1000_anth	59.12387202	0.234447088	40	45.55893935	0.946879655	1.082665595	15.88031133	0.41	0.777276339	0.356194491	0.032499325	9.04982961	1.352138035	0.498212855	19.96015862	0.79	0.8	0.002	0.16	0.18	0.15	0.92	0.853	0.002024	0.0016	0.135	0.009	0.03	0.025877419	0.008687716	0.087150805	0.297214302	0.921247366	0.520205572	15.74047068	0.099163422	44.64058093	2.359249752	0.939551662	0.5	0.5	2.933917439	11.30375162	2	0.623846964	292.6883
614	2	0	pop_healthy_1000_anth	46.93192702	0.197956591	40	31.71021609	1.177506092	1.184705886	15.39746444	0.41	0.779906719	0.29541518	0.031144087	8.190304476	1.279509565	0.482143385	8.907480101	0.79	0.8	0.002	0.16	0.18	0.15	0.92	0.853	0.002024	0.0016	0.135	0.009	0.03	0.027098364	0.013663819	0.093368883	0.286626454	1.017753392	0.400920896	14.76520355	0.082776028	45.34984967	2.869601565	0.831990677	0.5	0.5	0.737096018	9.149449879	2	0.942372514	292.6883
615	2	0	pop_healthy_1000_anth	54.98140018	0.207247264	40	21.97592579	0.896629827	0.991202054	16.28784003	0.41	0.646576193	0.280346884	0.036206195	8.84155389	1.417975031	0.491813271	17.62763022	0.753022391	0.76255432	0.001906386	0.192096297	0.224934816	0.18744568	0.876937468	0.813073544	0.001929262	0.001525109	0.168701112	0.011246741	0.037489136	0.027641221	0.010250766	0.126877211	0.349195268	1.008127205	0.280312337	15.04601693	0.081421667	45.06340727	2.936434211	1.334028863	0.496720828	0.496720828	0.589179299	13.18383424	1.986894012	1.227029893	292.6883
616	2	0	pop_healthy_1000_anth	55.38531072	0.219838135	40	26.60152136	1.163999732	0.759819136	15.87251632	0.41	0.709910195	0.292257224	0.032287324	8.469181847	1.318963462	0.479525705	15.29906347	0.774338678	0.784140433	0.001960351	0.173593915	0.19903148	0.165859567	0.901761498	0.836089737	0.001983875	0.001568281	0.14927361	0.009951574	0.033171913	0.027619999	0.01200022	0.109788446	0.382855481	0.867008303	0.481775876	14.91820732	0.081796559	44.14210756	2.709606883	1.012155552	0.498611155	0.498611155	1.126994752	26.17101157	1.994449152	1.153821117	292.6883
617	2	0	pop_healthy_1000_anth	51.31277817	0.245579912	40	29.49922076	0.930789269	0.936038856	14.4549417	0.41	0.642126874	0.27823411	0.032513249	7.18291422	1.356759217	0.50799017	14.69540217	0.787692242	0.79766303	0.001994158	0.162003117	0.182804364	0.15233697	0.917312485	0.850508206	0.002018087	0.001595326	0.137103273	0.009140218	0.030467394	0.028627718	0.011216687	0.093766975	0.358215113	0.86535607	0.446755134	15.00263933	0.137927286	42.87631721	2.555627503	1.524873781	0.499795348	0.499795348	0.585919839	27.02696745	1.999182061	1.327896124	292.6883
618	2	0	pop_healthy_1000_anth	54.70194468	0.206286612	40	45.62415618	0.8665107	0.964801162	16.28417877	0.41	0.78968997	0.490869532	0.032838692	9.121253842	1.28447415	0.515226004	14.57202142	0.79	0.8	0.002	0.16	0.18	0.15	0.92	0.853	0.002024	0.0016	0.135	0.009	0.03	0.026214414	0.010161084	0.083266004	0.389812403	0.946679122	0.57923524	15.01702416	0.131628714	43.31948426	2.550360659	1.489964094	0.5	0.5	0.404417519	9.450181934	2	1.306013109	292.6883
619	2	0	pop_healthy_1000_anth	53.47338462	0.221837814	40	33.17215868	0.928867639	1.039361575	15.52569492	0.41	0.611201883	0.319020953	0.034255506	8.304004866	1.280201198	0.509965693	13.35704444	0.79	0.8	0.002	0.16	0.18	0.15	0.92	0.853	0.002024	0.0016	0.135	0.009	0.03	0.024539335	0.013213541	0.092795449	0.163087676	1.00424815	0.38869998	15.09857506	0.081562606	43.63882919	2.852076559	1.405185515	0.5	0.5	0.55994993	22.82363264	2	0.639677526	292.6883
620	2	0	pop_healthy_1000_anth	60.5302521	0.235583902	40	45.89009446	0.708419942	0.99466804	16.02925861	0.41	0.652890687	0.20822762	0.032398006	8.865335834	1.352706366	0.512995749	16.30799299	0.79	0.8	0.002	0.16	0.18	0.15	0.92	0.853	0.002024	0.0016	0.135	0.009	0.03	0.026084714	0.009316902	0.085881767	0.273223252	0.870153946	0.737074368	14.953097	0.120442385	45.76128381	2.680465407	0.950351611	0.5	0.5	1.984782897	17.42194999	2	0.888131716	292.6883
621	2	0	pop_healthy_1000_anth	48.36773387	0.21583679	40	34.10535074	0.871546786	0.980826278	14.9697702	0.41	0.654307324	0.249122792	0.031544291	7.575858301	1.406122568	0.501203465	13.03808805	0.79	0.8	0.002	0.16	0.18	0.15	0.92	0.853	0.002024	0.0016	0.135	0.009	0.03	0.024041985	0.012042204	0.086621319	0.363829819	0.885561501	0.426406969	14.77300174	0.078985411	45.789893	2.80415699	1.350790521	0.5	0.5	1.546115781	17.90121935	2	1.271901391	292.6883
622	2	0	pop_healthy_1000_anth	46.77049367	0.191001491	40	22.2862182	0.874776409	0.963966717	15.64831565	0.41	0.636315684	0.263755218	0.034318495	8.067851294	1.377485167	0.494648197	9.287710051	0.754452322	0.764002352	0.001910006	0.190855127	0.223197178	0.185997648	0.878602704	0.814617507	0.001932926	0.001528005	0.167397884	0.011159859	0.03719953	0.02889112	0.008663362	0.127245012	0.370377125	0.978870592	0.587227936	14.68057073	0.088729332	44.46461926	2.896502409	0.879675778	0.496847635	0.496847635	0.632029148	15.97257799	1.987400823	1.122722643	292.6883
623	2	0	pop_healthy_1000_anth	55.37906106	0.245298261	40	41.95568931	0.857915418	0.765584995	15.02538327	0.41	0.701065586	0.213147795	0.029632882	8.103113961	1.264627462	0.509014219	16.63052414	0.79	0.8	0.002	0.16	0.18	0.15	0.92	0.853	0.002024	0.0016	0.135	0.009	0.03	0.025544792	0.011363653	0.090374941	0.395233014	0.873433533	0.174751187	14.77398941	0.151483465	44.62766895	2.70327183	1.045606577	0.5	0.5	1.938207193	22.70777836	2	1.428419644	292.6883
624	2	0	pop_healthy_1000_anth	52.98876773	0.230884339	40	42.45733389	1.04168462	0.742970441	15.14937346	0.41	0.981848182	0.389956358	0.029907711	7.903216392	1.243034186	0.510107471	13.0015246	0.79	0.8	0.002	0.16	0.18	0.15	0.92	0.853	0.002024	0.0016	0.135	0.009	0.03	0.025570811	0.010954145	0.089005625	0.266390703	0.863547054	0.393667383	15.1160424	0.062504156	46.46667935	2.579898403	1.333399009	0.5	0.5	0.682231554	30.93354293	2	0.896538503	292.6883
625	2	0	pop_healthy_1000_anth	58.58004055	0.192176573	40	26.74608313	0.887740517	0.934074796	17.45921092	0.41	0.794182587	0.297731691	0.032303442	10.49589524	1.3687686	0.537544698	15.0141368	0.775004866	0.784815055	0.001962038	0.173015667	0.198221934	0.165184945	0.902537313	0.836809052	0.001985582	0.00156963	0.148666451	0.009911097	0.033036989	0.026580721	0.013847188	0.106237271	0.36527156	0.938008636	0.400636291	15.31750729	0.097977438	45.12934918	2.773781034	0.735796143	0.498670233	0.498670233	0.606962209	11.59615707	1.994685269	0.958564141	292.6883
626	2	0	pop_healthy_1000_anth	63.29761707	0.231376725	40	36.27488539	1.125183659	1.393053746	16.53993679	0.41	0.85053077	0.365432763	0.035226204	9.884475807	1.441337397	0.539386771	15.30117516	0.79	0.8	0.002	0.16	0.18	0.15	0.92	0.853	0.002024	0.0016	0.135	0.009	0.03	0.026040796	0.013392279	0.085480037	0.334009246	0.859420066	0.372061528	15.08993346	0.090975599	45.93627616	3.013258287	0.548669171	0.5	0.5	0.889392992	15.09907967	2	1.678665566	292.6883
627	2	0	pop_healthy_1000_anth	69.49142772	0.233568295	40	36.63298418	0.914339094	1.021714069	17.24879147	0.41	0.651643657	0.391326141	0.033041906	10.11827042	1.410149207	0.516650759	23.44726139	0.79	0.8	0.002	0.16	0.18	0.15	0.92	0.853	0.002024	0.0016	0.135	0.009	0.03	0.025858868	0.013607659	0.090955309	0.392035925	0.956948729	0.523918176	15.03918972	0.132609859	44.61475408	2.571702464	1.492660901	0.5	0.5	1.147880132	12.63252748	2	0.770519495	292.6883
628	2	0	pop_healthy_1000_anth	57.87487244	0.23123619	40	51.2841429	0.946007902	0.933368775	15.82038765	0.41	0.890880008	0.334723395	0.034838003	8.349790584	1.39211759	0.484855918	19.85308699	0.79	0.8	0.002	0.16	0.18	0.15	0.92	0.853	0.002024	0.0016	0.135	0.009	0.03	0.025751602	0.00589187	0.081622178	0.257066102	0.879459554	0.409822963	15.03451576	0.072970878	45.09193333	2.411034901	1.576665151	0.5	0.5	0.493827424	20.49199283	2	0.927189017	292.6883
629	2	0	pop_healthy_1000_anth	63.73386732	0.220974186	40	22.52509775	1.084292535	1.312987031	16.98299824	0.41	0.755603109	0.305714428	0.034426761	9.52441763	1.389470603	0.492689999	22.42948405	0.755553159	0.765117123	0.001912793	0.189899609	0.221859453	0.184882877	0.879884691	0.815806132	0.001935746	0.001530234	0.166394589	0.011092973	0.036976575	0.027610366	0.010271848	0.131584603	0.198639563	0.964585732	0.485968196	14.83049066	0.133857902	44.95461645	2.700737743	1.397446849	0.496945257	0.496945257	0.56227309	21.62393859	1.987790993	0.746157726	292.6883
630	2	0	pop_healthy_1000_anth	61.39688633	0.226528799	40	54.09481987	1.057991932	0.730446429	16.46309416	0.41	0.510976291	0.31796852	0.028959646	8.768385596	1.363584057	0.49097749	21.4036933	0.79	0.8	0.002	0.16	0.18	0.15	0.92	0.853	0.002024	0.0016	0.135	0.009	0.03	0.025275793	0.006364357	0.086445491	0.307177743	0.920143298	0.660289557	14.59494584	0.115345073	45.4168564	2.364469804	1.000641966	0.5	0.5	1.95692591	20.24396963	2	1.032619546	292.6883
631	2	0	pop_healthy_1000_anth	57.18110969	0.233766229	40	41.38333961	0.923982107	1.103424777	15.63995158	0.41	0.679953382	0.415410783	0.034825537	8.357751013	1.203806504	0.500869776	14.80211948	0.79	0.8	0.002	0.16	0.18	0.15	0.92	0.853	0.002024	0.0016	0.135	0.009	0.03	0.025692225	0.012426524	0.090421681	0.405780494	0.876883691	0.706919081	15.00585391	0.124898294	44.99805475	2.363690781	0.719266576	0.5	0.5	1.550751921	15.11614991	2	1.106742882	292.6883
632	2	0	pop_healthy_1000_anth	51.65728555	0.201904818	40	20.31147776	0.899123541	1.168916394	15.9953022	0.41	0.579649363	0.279559389	0.032243026	8.322289462	1.282511307	0.531361609	12.34950462	0.74535206	0.754786896	0.001886967	0.198754089	0.234255725	0.195213104	0.868004931	0.804791528	0.001909611	0.001509574	0.175691793	0.011712786	0.039042621	0.028002177	0.009251469	0.138068482	0.423198528	0.915865769	0.340409838	14.6929138	0.127096781	43.83335756	2.478057567	1.170182225	0.496040624	0.496040624	0.896945837	24.73368032	1.984175414	1.648311412	292.6883
633	2	0	pop_healthy_1000_anth	66.04170222	0.235293461	40	37.34526615	0.754507296	0.716616402	16.75344795	0.41	0.686742718	0.299990537	0.03556624	9.406859547	1.37077061	0.529285041	18.37140604	0.79	0.8	0.002	0.16	0.18	0.15	0.92	0.853	0.002024	0.0016	0.135	0.009	0.03	0.02716622	0.013711158	0.097793233	0.345508484	0.950184322	0.292999947	14.77874783	0.095410315	45.83127161	2.766666019	0.563893522	0.5	0.5	1.177546431	8.548279466	2	0.977980621	292.6883
634	2	0	pop_healthy_1000_anth	57.37322679	0.211080347	40	47.93343925	1.181321543	0.775381503	16.48658625	0.41	0.612302704	0.468926227	0.035274494	9.190167368	1.400619887	0.482602143	14.92757223	0.79	0.8	0.002	0.16	0.18	0.15	0.92	0.853	0.002024	0.0016	0.135	0.009	0.03	0.027610114	0.008364679	0.083231144	0.30986353	0.889167173	0.556625509	14.87317771	0.084883864	43.36411374	2.666860189	1.268635073	0.5	0.5	0.688468312	11.27705149	2	0.929384215	292.6883
635	2	0	pop_healthy_1000_anth	58.13102877	0.23175617	40	36.74006314	0.77166014	1.415519646	15.83756286	0.41	0.865401388	0.27228319	0.03417237	8.84565934	1.370128548	0.461906284	16.73815444	0.79	0.8	0.002	0.16	0.18	0.15	0.92	0.853	0.002024	0.0016	0.135	0.009	0.03	0.026800985	0.012131139	0.083630424	0.196853716	0.91401493	0.393306758	14.57495043	0.147765204	43.14792416	2.727979821	0.764802251	0.5	0.5	0.767340822	10.83678489	2	0.962944981	292.6883
636	2	0	pop_healthy_1000_anth	56.10614695	0.215014868	40	36.46429335	1.28157657	0.835933863	16.15366143	0.41	0.789362617	0.395683438	0.034390893	9.426451744	1.400819896	0.484370091	13.27871262	0.79	0.8	0.002	0.16	0.18	0.15	0.92	0.853	0.002024	0.0016	0.135	0.009	0.03	0.024824782	0.013333835	0.090485675	0.417005329	0.932400969	0.412142082	15.31889513	0.129517717	44.87395127	2.708184109	1.948473094	0.5	0.5	2.182300953	10.22989331	2	1.336037263	292.6883
637	2	0	pop_healthy_1000_anth	57.99463211	0.206817296	40	34.94243589	0.968603822	1.009475983	16.74559066	0.41	0.749627134	0.338672083	0.031015372	9.350725569	1.381507025	0.490904029	16.07772494	0.79	0.8	0.002	0.16	0.18	0.15	0.92	0.853	0.002024	0.0016	0.135	0.009	0.03	0.026075416	0.013340889	0.086830767	0.284621536	0.861716548	0.377061426	15.28746296	0.123282269	43.46837783	2.607218331	1.36456869	0.5	0.5	3.621945487	11.75906009	2	0.744323336	292.6883
638	2	0	pop_healthy_1000_anth	49.55378836	0.203049167	40	52.85300988	1.214300981	1.193660333	15.62204285	0.41	0.739458155	0.314399266	0.032720953	8.209709253	1.359555315	0.492068943	13.24996307	0.79	0.8	0.002	0.16	0.18	0.15	0.92	0.853	0.002024	0.0016	0.135	0.009	0.03	0.027351318	0.005692804	0.084403004	0.411067172	0.869353385	0.423904153	14.65640731	0.112832641	45.02748368	2.226166132	0.674068314	0.5	0.5	0.673502713	44.13670988	2	1.301977671	292.6883
639	2	0	pop_healthy_1000_anth	66.38723683	0.245577617	40	55.36542011	0.901647189	1.033608649	16.44174491	0.41	0.721213814	0.40359333	0.030676344	9.113773613	1.375101376	0.488380368	21.25762694	0.79	0.8	0.002	0.16	0.18	0.15	0.92	0.853	0.002024	0.0016	0.135	0.009	0.03	0.025315762	0.006443354	0.093772329	0.328303489	0.957365473	0.395079056	14.43713377	0.132599541	44.66496933	2.445300007	1.484353778	0.5	0.5	0.644328482	17.40040465	2	1.182420892	292.6883
640	2	0	pop_healthy_1000_anth	58.52742364	0.221032478	40	41.94539794	0.965273162	0.910587666	16.27240172	0.41	0.870433893	0.42916096	0.032534281	8.485727826	1.562946846	0.508921717	20.83156802	0.79	0.8	0.002	0.16	0.18	0.15	0.92	0.853	0.002024	0.0016	0.135	0.009	0.03	0.027648138	0.0115826	0.093418643	0.373008135	0.881398627	0.514646442	14.47734782	0.122266335	44.09558976	2.673120697	0.377481889	0.5	0.5	0.967163701	27.23038072	2	0.740667981	292.6883
641	2	0	pop_healthy_1000_anth	70.71244584	0.234637249	40	53.7136006	0.587919942	0.886441081	17.3599892	0.41	0.812733526	0.344631075	0.033485089	11.03523003	1.331474664	0.486040008	25.80125058	0.79	0.8	0.002	0.16	0.18	0.15	0.92	0.853	0.002024	0.0016	0.135	0.009	0.03	0.027696327	0.007125956	0.084318945	0.388581752	0.946645356	0.389137643	14.95716621	0.083683062	44.842698	2.21043055	1.198329736	0.5	0.5	2.102097575	22.01835384	2	0.907859389	292.6883
642	2	0	pop_healthy_1000_anth	69.19282239	0.247003498	40	59.60759904	1.540281276	1.218265797	16.73705222	0.41	0.954987768	0.436719395	0.03391346	8.781579923	1.29422254	0.461361711	24.91275295	0.79	0.8	0.002	0.16	0.18	0.15	0.92	0.853	0.002024	0.0016	0.135	0.009	0.03	0.027870802	0.005414889	0.094177643	0.416385416	0.944177926	0.503903734	15.1893838	0.100347526	45.51204989	2.02073438	1.230151458	0.5	0.5	1.477916138	11.96794927	2	0.746767401	292.6883
643	2	0	pop_healthy_1000_anth	59.67610163	0.226119595	40	34.59165849	1.058429412	0.972656581	16.24542671	0.41	0.751453622	0.383613398	0.03382664	8.961889176	1.38572699	0.545725745	15.45936037	0.79	0.8	0.002	0.16	0.18	0.15	0.92	0.853	0.002024	0.0016	0.135	0.009	0.03	0.025835176	0.013924506	0.089006398	0.225184118	0.935841388	0.399333759	15.25610724	0.106941553	44.58110371	2.653767569	0.960678322	0.5	0.5	0.725845659	10.52968764	2	0.815644928	292.6883
644	2	0	pop_healthy_1000_anth	57.92462898	0.247648387	40	35.33714787	1.285128806	1.048540977	15.29374618	0.41	0.61393602	0.325150392	0.031636089	7.950685345	1.375511201	0.497276099	20.39704909	0.79	0.8	0.002	0.16	0.18	0.15	0.92	0.853	0.002024	0.0016	0.135	0.009	0.03	0.026037946	0.012123815	0.089663241	0.27639785	0.90152255	0.569841967	15.10299057	0.117709763	43.71515583	2.698042824	0.536898809	0.5	0.5	1.049490632	11.38772746	2	0.956227421	292.6883
645	2	0	pop_healthy_1000_anth	52.34338075	0.210404783	40	43.99463707	1.086842642	0.93785419	15.77259241	0.41	0.88928266	0.174920326	0.030994056	8.353997092	1.327008978	0.506425181	9.91201147	0.79	0.8	0.002	0.16	0.18	0.15	0.92	0.853	0.002024	0.0016	0.135	0.009	0.03	0.025751243	0.010757042	0.097885774	0.320384192	0.978940087	0.394972778	15.4389777	0.083493236	45.16147066	2.688551214	1.089690874	0.5	0.5	0.780901275	16.66568746	2	1.023582436	292.6883
646	2	0	pop_healthy_1000_anth	63.79521164	0.248924873	40	45.04860086	0.779954903	0.874785844	16.00884112	0.41	0.620903588	0.338820288	0.031618028	8.589400612	1.380777577	0.464308837	21.75507098	0.79	0.8	0.002	0.16	0.18	0.15	0.92	0.853	0.002024	0.0016	0.135	0.009	0.03	0.024440865	0.009543921	0.079690899	0.374179032	0.851156441	0.311220547	14.86090896	0.116907698	42.95486173	2.181759805	1.520213064	0.5	0.5	0.464197998	20.39487081	2	1.157483496	292.6883
647	2	0	pop_healthy_1000_anth	60.76500064	0.229150311	40	37.01334284	1.180101581	0.784132769	16.28420375	0.41	0.739586521	0.362868823	0.031892232	9.000153158	1.254415727	0.513191329	16.39747606	0.79	0.8	0.002	0.16	0.18	0.15	0.92	0.853	0.002024	0.0016	0.135	0.009	0.03	0.026880088	0.013492791	0.089808848	0.41813441	0.933129035	0.443939039	15.11609048	0.136605209	44.73841521	2.783834382	0.9266438	0.5	0.5	0.642385585	18.7932902	2	0.827738294	292.6883
648	2	0	pop_healthy_1000_anth	52.84010497	0.21487438	40	30.07405365	1.200894366	0.743177904	15.68156915	0.41	0.674191476	0.32487537	0.033167116	8.631897529	1.316743014	0.538878819	15.7994265	0.79	0.8	0.002	0.16	0.18	0.15	0.92	0.853	0.002024	0.0016	0.135	0.009	0.03	0.022738121	0.013002274	0.090915767	0.378175938	0.863362657	0.436840123	14.95639904	0.067076589	45.50243299	2.763705518	0.806287882	0.5	0.5	0.672996613	10.79180051	2	1.386674285	292.6883
649	2	0	pop_healthy_1000_anth	47.62718169	0.246668488	40	36.70092373	0.759122335	0.866518788	13.89538569	0.41	0.666370756	0.26086136	0.033622369	6.700530082	1.37161491	0.546046084	13.61586644	0.79	0.8	0.002	0.16	0.18	0.15	0.92	0.853	0.002024	0.0016	0.135	0.009	0.03	0.027291142	0.011562048	0.083188022	0.269175389	0.935148848	0.400469418	14.35629009	0.162865779	44.70338878	2.83513361	0.91605736	0.5	0.5	1.093700947	14.1282598	2	1.550330913	292.6883
650	2	0	pop_healthy_1000_anth	66.62910483	0.217749511	40	42.83279586	1.064882046	1.020045444	17.49256091	0.41	0.743881494	0.418722949	0.033443381	9.644415719	1.372637831	0.487687049	15.51148607	0.79	0.8	0.002	0.16	0.18	0.15	0.92	0.853	0.002024	0.0016	0.135	0.009	0.03	0.024772561	0.01145504	0.091472412	0.34595654	0.837539476	0.597037201	15.53087865	0.145495944	43.9356173	2.676006268	0.471648488	0.5	0.5	1.214974824	13.30762095	2	1.038500534	292.6883
651	2	0	pop_healthy_1000_anth	49.49008877	0.223294228	40	34.59042019	1.332562695	1.063908732	14.88745178	0.41	0.728240462	0.261724132	0.032548731	7.754752586	1.526666499	0.468673006	14.76023002	0.79	0.8	0.002	0.16	0.18	0.15	0.92	0.853	0.002024	0.0016	0.135	0.009	0.03	0.026279606	0.01225681	0.090208807	0.36859451	0.829574128	0.42582305	14.61502733	0.076486144	43.6554512	2.971473305	0.495510299	0.5	0.5	0.965571229	8.553299837	2	1.13339254	292.6883
652	2	0	pop_healthy_1000_anth	69.4894587	0.235105725	40	38.93970498	0.874028802	1.187012596	17.19205776	0.41	0.835091463	0.352041996	0.031596838	10.12154637	1.399197956	0.510082487	21.28197421	0.79	0.8	0.002	0.16	0.18	0.15	0.92	0.853	0.002024	0.0016	0.135	0.009	0.03	0.024501357	0.013998505	0.091831466	0.274332469	0.937201219	0.420493463	15.18511288	0.122347052	45.56604685	2.549527408	1.636807315	0.5	0.5	0.873784711	5.680964216	2	1.079607078	292.6883
653	2	0	pop_healthy_1000_anth	62.782905	0.244555574	40	30.31681926	1.210439714	1.006987138	16.02256051	0.41	0.74313723	0.298911297	0.031902587	8.832881561	1.417402554	0.495480516	24.21425815	0.79	0.8	0.002	0.16	0.18	0.15	0.92	0.853	0.002024	0.0016	0.135	0.009	0.03	0.025228369	0.012516526	0.092319622	0.199826309	0.865720822	0.307300202	14.88293814	0.138379589	43.64495207	2.760457045	1.159623254	0.5	0.5	0.358978921	13.57133276	2	0.941005524	292.6883
654	2	0	pop_healthy_1000_anth	60.54544703	0.239850262	40	28.5451456	0.983088486	0.903818432	15.88805177	0.41	0.685534454	0.335824321	0.032290372	8.471553479	1.275296053	0.525602297	21.30029715	0.783295546	0.793210679	0.001983027	0.165819418	0.188147185	0.156789321	0.912192281	0.845760887	0.002006823	0.001586421	0.141110388	0.009407359	0.031357864	0.025836339	0.013397488	0.100032293	0.210094718	0.873523804	0.382191843	15.00910416	0.088385982	42.38770326	2.643493692	0.780027124	0.49940545	0.49940545	0.906348363	16.47121251	1.997623738	1.093497097	292.6883
655	2	0	pop_healthy_1000_anth	53.92601084	0.225423185	40	42.88905426	1.144157732	0.842025569	15.46677816	0.41	0.484060116	0.291380809	0.032036783	8.241483668	1.370251338	0.473549705	15.50963887	0.79	0.8	0.002	0.16	0.18	0.15	0.92	0.853	0.002024	0.0016	0.135	0.009	0.03	0.027416303	0.012079077	0.090704312	0.297595682	0.8985151	0.389312578	14.94594769	0.081474786	44.03104109	2.640235332	1.193982264	0.5	0.5	1.895469223	21.19696475	2	1.600939496	292.6883
656	2	0	pop_healthy_1000_anth	62.4847121	0.228655074	40	49.39404999	1.045311176	1.104603843	16.53089873	0.41	0.780628377	0.363878024	0.034782974	9.084194606	1.342554906	0.533232494	19.55874713	0.79	0.8	0.002	0.16	0.18	0.15	0.92	0.853	0.002024	0.0016	0.135	0.009	0.03	0.02504795	0.007714961	0.093078786	0.277586544	0.878907465	0.090450385	15.2165411	0.123771615	44.95272569	2.202431573	1.039706575	0.5	0.5	1.254718233	9.673938634	2	0.962346561	292.6883
657	2	0	pop_healthy_1000_anth	63.54583761	0.217920889	40	27.46101823	1.361098161	1.102378325	17.07631365	0.41	0.749284213	0.340734003	0.031489069	9.951503778	1.286090125	0.56060603	20.09737585	0.778299526	0.788151418	0.001970379	0.170155927	0.194218298	0.161848582	0.906374131	0.84036645	0.001994023	0.001576303	0.145663723	0.009710915	0.032369716	0.026981208	0.013098794	0.104634412	0.490554229	0.879448894	0.438902573	15.04147611	0.097329939	44.4410856	2.985308814	2.040657118	0.498962403	0.498962403	2.18540997	24.32769914	1.995852996	0.499794201	292.6883
658	2	0	pop_healthy_1000_anth	55.10233658	0.235565357	40	49.19997187	1.072087401	0.778674453	15.29428915	0.41	0.870968921	0.276598242	0.033551691	7.982608295	1.345889754	0.510749701	16.62598474	0.79	0.8	0.002	0.16	0.18	0.15	0.92	0.853	0.002024	0.0016	0.135	0.009	0.03	0.024077447	0.007420849	0.088502658	0.35556493	0.897319456	0.495853372	15.22732075	0.0799619	44.11121482	2.395807147	0.657509189	0.5	0.5	0.53971119	20.51208167	2	1.202649176	292.6883
659	2	0	pop_healthy_1000_anth	57.03535598	0.236701301	40	50.16444416	0.801275189	1.209770226	15.52286053	0.41	0.818573598	0.40442633	0.031678385	8.151168266	1.331962347	0.500519405	18.92644105	0.79	0.8	0.002	0.16	0.18	0.15	0.92	0.853	0.002024	0.0016	0.135	0.009	0.03	0.02635574	0.006603548	0.089822308	0.180960922	0.917812451	0.452903966	14.95539925	0.150708932	44.20728392	2.541387932	2.505622395	0.5	0.5	1.00768905	19.98847438	2	0.960144914	292.6883
660	2	0	pop_healthy_1000_anth	62.02796543	0.243980067	40	58.48889863	0.725763161	0.910009865	15.9447089	0.41	0.895175755	0.302075615	0.034268216	8.520316307	1.279292886	0.458972104	24.73455155	0.79	0.8	0.002	0.16	0.18	0.15	0.92	0.853	0.002024	0.0016	0.135	0.009	0.03	0.02550113	0.006862377	0.094932826	0.422871917	1.031570748	0.312861976	14.96996125	0.148951407	43.75353551	2.208822427	0.917083566	0.5	0.5	1.217203723	18.77836767	2	1.172186824	292.6883
661	2	0	pop_healthy_1000_anth	62.33584241	0.210842038	40	31.21587625	0.996167096	1.247109602	17.19453018	0.41	0.816468827	0.330795025	0.031502342	10.11566833	1.402366842	0.491842796	16.32357974	0.79	0.8	0.002	0.16	0.18	0.15	0.92	0.853	0.002024	0.0016	0.135	0.009	0.03	0.026351407	0.013839328	0.089795334	0.470172162	0.8479425	0.352501035	14.86168702	0.131027207	43.64016926	2.671371715	1.048232914	0.5	0.5	1.405966292	7.553645814	2	1.273398758	292.6883
662	2	0	pop_healthy_1000_anth	67.34812736	0.243728649	40	32.2203743	0.815917429	1.2064879	16.62300256	0.41	0.781761669	0.315066635	0.033783235	9.615920345	1.32088498	0.560804719	23.48377679	0.79	0.8	0.002	0.16	0.18	0.15	0.92	0.853	0.002024	0.0016	0.135	0.009	0.03	0.024933326	0.013913257	0.076139794	0.434314155	0.945365861	0.51290628	15.07841935	0.079674256	42.54605325	2.612019178	0.955374173	0.5	0.5	4.161374303	11.71223735	2	1.205319667	292.6883
663	2	0	pop_healthy_1000_anth	47.72570368	0.237681472	40	43.22750784	0.869930651	1.094458388	14.17028241	0.41	0.740422316	0.344184266	0.028606153	6.908540591	1.375093405	0.510581751	11.44282609	0.79	0.8	0.002	0.16	0.18	0.15	0.92	0.853	0.002024	0.0016	0.135	0.009	0.03	0.026007367	0.009762253	0.093340667	0.264228135	0.888140998	0.44832526	14.7565678	0.053374678	43.72801243	2.453674202	0.90431813	0.5	0.5	1.734818521	20.44519429	2	0.976936469	292.6883
664	2	0	pop_healthy_1000_anth	63.51344347	0.225302308	40	31.66302678	0.962263664	1.132440698	16.78997346	0.41	0.830131649	0.315262436	0.032650535	9.640803056	1.254569538	0.541010564	21.07859212	0.79	0.8	0.002	0.16	0.18	0.15	0.92	0.853	0.002024	0.0016	0.135	0.009	0.03	0.025432303	0.013239828	0.095791491	0.29605792	0.92598119	0.505339257	14.71681441	0.115174152	45.08632738	2.942578639	1.051485222	0.5	0.5	0.522052301	23.52284214	2	1.209304174	292.6883
665	2	0	pop_healthy_1000_anth	56.34464338	0.20216198	40	36.87855848	1.233554565	0.949709226	16.69462145	0.41	0.789881328	0.293549835	0.032061906	9.548152414	1.401946837	0.516291323	13.67716705	0.79	0.8	0.002	0.16	0.18	0.15	0.92	0.853	0.002024	0.0016	0.135	0.009	0.03	0.026964914	0.013609341	0.090164558	0.283492148	0.89598289	0.540756508	14.67274789	0.161219287	45.85672293	2.740898406	2.307746265	0.5	0.5	1.326309248	20.79081776	2	1.316303941	292.6883
666	2	0	pop_healthy_1000_anth	55.17882957	0.206678951	40	23.70961545	0.808628903	1.196172565	16.33947576	0.41	0.703740817	0.307580381	0.034331922	8.819021488	1.393320438	0.497110464	13.44499007	0.761011811	0.770644872	0.001926612	0.185161538	0.215226153	0.179355128	0.886241603	0.821700095	0.001949732	0.00154129	0.161419615	0.010761308	0.035871026	0.025421136	0.010645675	0.117546635	0.370101614	0.963369094	0.445273683	15.00278423	0.163785508	45.1023624	2.740620012	0.47039528	0.49742933	0.49742933	2.179575772	19.92852708	1.989725705	1.22282031	292.6883
667	2	0	pop_healthy_1000_anth	66.74410151	0.221647989	40	35.94652765	0.823131241	0.889316965	17.35299924	0.41	0.77132064	0.290342382	0.034066135	9.815465165	1.357265477	0.524510446	22.33891908	0.79	0.8	0.002	0.16	0.18	0.15	0.92	0.853	0.002024	0.0016	0.135	0.009	0.03	0.026944588	0.013816588	0.088878992	0.507517203	0.889828956	0.316153375	14.88966154	0.121637226	44.62748857	2.71289305	0.596221113	0.5	0.5	2.676000211	9.683179386	2	0.956754621	292.6883
668	2	0	pop_healthy_1000_anth	52.61241445	0.24273843	40	56.75042622	0.939550746	0.784392954	14.72227234	0.41	0.71272118	0.25108191	0.029180149	7.346184898	1.317268245	0.469119093	21.42716033	0.79	0.8	0.002	0.16	0.18	0.15	0.92	0.853	0.002024	0.0016	0.135	0.009	0.03	0.025784959	0.005517151	0.089868986	0.367250919	0.913855155	0.346912386	15.05549925	0.142792098	43.54952301	2.338257095	0.886003753	0.5	0.5	1.839902463	10.13633771	2	0.795896373	292.6883
669	2	0	pop_healthy_1000_anth	58.31118582	0.244176554	40	51.1676133	0.741031138	1.044265198	15.45339681	0.41	1.019133752	0.231611436	0.030852641	8.685497251	1.408573887	0.46326927	18.60426489	0.79	0.8	0.002	0.16	0.18	0.15	0.92	0.853	0.002024	0.0016	0.135	0.009	0.03	0.025913503	0.006004426	0.089905356	0.182503976	0.852722759	0.38818007	14.77591736	0.11056637	45.06265167	2.166147585	0.711771651	0.5	0.5	0.702918819	13.22404624	2	1.622853721	292.6883
670	2	0	pop_healthy_1000_anth	58.774413	0.239698047	40	20.65546803	1.088050306	1.332447188	15.6589235	0.41	0.665371228	0.256161146	0.033928848	7.950390691	1.416613659	0.543806649	20.44065391	0.746937282	0.756392184	0.00189098	0.197378128	0.232329379	0.193607816	0.869851012	0.806503166	0.001913672	0.001512784	0.174247034	0.011616469	0.038721563	0.025012809	0.008898571	0.121073948	0.285253956	0.970759181	0.397008076	14.55139055	0.130220216	45.28890903	2.592392823	0.844822684	0.496181201	0.496181201	0.327776777	14.79139093	1.984737264	1.145179594	292.6883
671	2	0	pop_healthy_1000_anth	61.11413484	0.22871413	40	49.00037107	0.791724092	0.819799758	16.34648333	0.41	0.788213778	0.303257657	0.033780147	9.285713149	1.338171378	0.555932429	15.62136595	0.79	0.8	0.002	0.16	0.18	0.15	0.92	0.853	0.002024	0.0016	0.135	0.009	0.03	0.024713068	0.007587786	0.087912035	0.250550208	0.915667407	0.483848769	15.15805339	0.145775823	44.57216585	2.409709486	1.674563051	0.5	0.5	1.545364656	15.59620271	2	1.088566252	292.6883
672	2	0	pop_healthy_1000_anth	65.74371276	0.230559845	40	47.6532969	0.996005739	1.043546064	16.88633021	0.41	1.101386818	0.304776649	0.033946163	9.237210525	1.369612618	0.502906021	18.64895071	0.79	0.8	0.002	0.16	0.18	0.15	0.92	0.853	0.002024	0.0016	0.135	0.009	0.03	0.026411646	0.007999655	0.093158398	0.454276845	0.998571336	0.235730997	14.95827366	0.095990738	44.86110893	2.470807247	0.386060381	0.5	0.5	0.650393768	25.50621359	2	1.062080279	292.6883
673	2	0	pop_healthy_1000_anth	50.96344453	0.209027934	40	41.03342471	1.157382681	1.024013186	15.61446909	0.41	0.747382744	0.343040009	0.032146418	7.839922662	1.351735186	0.529630821	9.454882177	0.79	0.8	0.002	0.16	0.18	0.15	0.92	0.853	0.002024	0.0016	0.135	0.009	0.03	0.025329498	0.011999905	0.081256127	0.3141024	0.960449789	0.305788534	15.35698912	0.108824744	44.0740365	2.750374589	1.854948412	0.5	0.5	0.481706959	20.75168039	2	1.072306081	292.6883
674	2	0	pop_healthy_1000_anth	49.3639256	0.19758198	40	25.96472623	1.300537457	1.092216286	15.80633484	0.41	0.762822352	0.307724649	0.032962562	8.376434742	1.396831533	0.498165415	12.6163245	0.771404113	0.781168722	0.001952922	0.176141095	0.202597533	0.168831278	0.898344031	0.83292115	0.001976357	0.001562337	0.15194815	0.010129877	0.033766256	0.029037377	0.010746836	0.109928924	0.325125935	0.908883841	0.465367621	14.94464747	0.115311318	44.15087364	2.625585399	0.981093276	0.498350918	0.498350918	0.881499885	16.96335672	1.993409053	1.026359806	292.6883
675	2	0	pop_healthy_1000_anth	63.53304576	0.246304456	40	43.62051758	1.174242728	0.9696491	16.06067167	0.41	0.835424954	0.176234374	0.029620529	8.964353958	1.302901446	0.511435992	21.46190937	0.79	0.8	0.002	0.16	0.18	0.15	0.92	0.853	0.002024	0.0016	0.135	0.009	0.03	0.027132105	0.010928164	0.09364501	0.294524547	0.91807174	0.324434834	14.63581605	0.097301715	43.61028203	2.497445473	0.692043236	0.5	0.5	1.398697813	10.88129958	2	0.593736136	292.6883
676	2	0	pop_healthy_1000_anth	60.38418114	0.238117352	40	49.98545186	0.982105163	0.938723074	15.92450967	0.41	0.59813424	0.271741028	0.027840103	8.418006635	1.333812657	0.444788674	20.30079565	0.79	0.8	0.002	0.16	0.18	0.15	0.92	0.853	0.002024	0.0016	0.135	0.009	0.03	0.028276637	0.006066271	0.081670679	0.219213616	0.918703489	0.064992351	15.2513541	0.098266463	45.916563	2.452584975	1.78041514	0.5	0.5	1.696589345	18.03237361	2	1.041706093	292.6883
677	2	0	pop_healthy_1000_anth	67.08177011	0.242981752	40	56.71513889	1.019099898	0.803595456	16.615577	0.41	0.567941228	0.303790277	0.032685381	9.42486617	1.443839102	0.424702525	21.68982662	0.79	0.8	0.002	0.16	0.18	0.15	0.92	0.853	0.002024	0.0016	0.135	0.009	0.03	0.026082438	0.005138085	0.0989143	0.33237497	0.917974176	0.453822486	14.82100257	0.086092157	43.73848036	2.047644333	0.698036303	0.5	0.5	0.770705852	11.53052405	2	0.614360667	292.6883
678	2	0	pop_healthy_1000_anth	51.4108324	0.212738384	40	33.33966077	0.938731282	0.802172701	15.54548909	0.41	0.710225306	0.308628404	0.031892081	8.217450846	1.322429412	0.573067408	12.76376198	0.79	0.8	0.002	0.16	0.18	0.15	0.92	0.853	0.002024	0.0016	0.135	0.009	0.03	0.026673643	0.011281736	0.090261525	0.308893875	0.851502633	0.411201224	15.13517305	0.128610434	43.53176248	2.640745888	0.468431969	0.5	0.5	1.500808536	30.29468779	2	1.008665064	292.6883
679	2	0	pop_healthy_1000_anth	51.91126728	0.19586005	40	24.37348327	1.163738631	0.848441166	16.28013062	0.41	0.699129912	0.301888594	0.032228098	8.893611821	1.497425306	0.541926614	12.89054074	0.764071135	0.773742922	0.001934357	0.182506067	0.211508494	0.176257078	0.88980436	0.82500339	0.00195757	0.001547486	0.15863137	0.010575425	0.035251416	0.028376087	0.01039797	0.109853547	0.299683193	0.890665843	0.231570146	15.19714111	0.144810473	45.81155798	3.017317544	0.21282599	0.49770063	0.49770063	0.694054407	8.667619181	1.990810023	1.067180777	292.6883
680	2	0	pop_healthy_1000_anth	66.63318197	0.238547622	40	38.27552813	1.037433714	0.973305125	16.71312767	0.41	0.625204548	0.45446926	0.034050541	9.669444161	1.311510107	0.506038773	23.19786025	0.79	0.8	0.002	0.16	0.18	0.15	0.92	0.853	0.002024	0.0016	0.135	0.009	0.03	0.026332867	0.013061071	0.080452062	0.315121921	0.912661515	0.28364438	14.937346	0.084532194	44.2038182	2.696490865	1.051178228	0.5	0.5	1.587526704	12.90386989	2	1.056926283	292.6883
681	2	0	pop_healthy_1000_anth	49.6964281	0.238713659	40	36.47775375	0.997283799	0.870668536	14.428592	0.41	0.789853585	0.292303499	0.032293441	7.678116397	1.337972248	0.509989757	14.49156085	0.79	0.8	0.002	0.16	0.18	0.15	0.92	0.853	0.002024	0.0016	0.135	0.009	0.03	0.024780993	0.011747454	0.092765507	0.290038007	0.945871943	0.37927719	14.67794362	0.129646167	47.01976712	2.76963904	0.614368241	0.5	0.5	3.382852921	27.22644547	2	0.792687186	292.6883
682	2	0	pop_healthy_1000_anth	61.88643245	0.214685865	40	42.80598776	1.1569875	1.211550498	16.97837018	0.41	0.629547021	0.250183432	0.035583179	9.490328861	1.353946213	0.501600146	13.44810628	0.79	0.8	0.002	0.16	0.18	0.15	0.92	0.853	0.002024	0.0016	0.135	0.009	0.03	0.023769855	0.011447858	0.089254664	0.369413755	0.847383234	0.411458355	15.07365495	0.126635409	44.88771208	2.444879573	0.980349837	0.5	0.5	0.754846056	16.73256261	2	1.673288321	292.6883
683	2	0	pop_healthy_1000_anth	53.07922262	0.193820404	40	42.99605531	1.100627412	1.097754881	16.54864842	0.41	0.860429363	0.456202393	0.031890595	9.18925783	1.401368678	0.478984563	12.36632591	0.79	0.8	0.002	0.16	0.18	0.15	0.92	0.853	0.002024	0.0016	0.135	0.009	0.03	0.025421515	0.010529422	0.087182915	0.281909243	0.975718443	0.331741036	15.23039101	0.120909311	43.57181613	2.342434995	0.788129573	0.5	0.5	1.2158157	14.00497242	2	0.940575159	292.6883
684	2	0	pop_healthy_1000_anth	55.31030844	0.207000298	40	23.3187303	0.838827524	0.998257551	16.34622809	0.41	0.699736045	0.312996768	0.032906768	8.86346418	1.34312922	0.487048861	12.91300665	0.759210482	0.768820741	0.001922052	0.186725079	0.21741511	0.181179259	0.884143853	0.819755115	0.001945116	0.001537641	0.163061333	0.010870756	0.036235852	0.025698203	0.011013095	0.126740985	0.278460319	0.859622171	0.426726312	15.10436839	0.119564668	42.56236356	2.562516764	0.681632831	0.497269588	0.497269588	0.714417392	6.382993741	1.989087259	0.987254904	292.6883
685	2	0	pop_healthy_1000_anth	51.6697181	0.205493811	40	30.14269049	0.896368774	1.054143236	15.85691408	0.41	0.742825585	0.329289779	0.033515428	8.651005003	1.358737261	0.504754594	12.2751804	0.79	0.8	0.002	0.16	0.18	0.15	0.92	0.853	0.002024	0.0016	0.135	0.009	0.03	0.028747248	0.013308754	0.079952407	0.39137058	0.857355791	0.397178014	14.84870195	0.122378695	43.26421878	2.534915485	2.156651307	0.5	0.5	0.825971661	11.39575782	2	0.535432117	292.6883
686	2	0	pop_healthy_1000_anth	50.37673524	0.215811764	40	21.99714433	1.066469954	1.135701627	15.27838509	0.41	0.629433151	0.265592224	0.032345652	7.679592083	1.351556927	0.541837467	14.81384785	0.753120173	0.76265334	0.001906633	0.192011423	0.224815992	0.18734666	0.877051341	0.813179124	0.001929513	0.001525307	0.168611994	0.0112408	0.037469332	0.031062267	0.00893703	0.130318675	0.290116083	0.988785415	0.362568007	14.87713593	0.115304232	45.74571626	2.800869219	0.54393305	0.4967295	0.4967295	1.622304936	22.34246337	1.986928669	1.010386566	292.6883
687	2	0	pop_healthy_1000_anth	57.73602352	0.222047828	40	58.89707895	0.836038792	1.209210737	16.1250166	0.41	0.801213167	0.523656453	0.031387203	8.466946889	1.366497144	0.487427725	15.1487015	0.79	0.8	0.002	0.16	0.18	0.15	0.92	0.853	0.002024	0.0016	0.135	0.009	0.03	0.024741923	0.004461008	0.09377065	0.43935609	1.001243429	0.599450095	14.97051099	0.06335626	43.10327671	2.168650659	0.700595837	0.5	0.5	1.761683915	22.08238138	2	1.04793413	292.6883
688	2	0	pop_healthy_1000_anth	56.53124572	0.248006171	40	31.66031872	1.267764193	0.941603495	15.09777798	0.41	0.74944414	0.32695361	0.032852008	7.780221481	1.284034646	0.515278185	21.22386237	0.79	0.8	0.002	0.16	0.18	0.15	0.92	0.853	0.002024	0.0016	0.135	0.009	0.03	0.027217864	0.01215447	0.08075026	0.293338	0.88754697	0.31709205	15.12629337	0.105678283	44.17016649	2.685265951	0.979518612	0.5	0.5	0.629990216	18.70559899	2	0.89651776	292.6883
689	2	0	pop_healthy_1000_anth	55.69668663	0.242973148	40	21.89511281	1.052531444	1.008660453	15.14033692	0.41	0.597688861	0.283888248	0.032929483	7.52188146	1.450100955	0.500665217	18.19952529	0.752649978	0.762177193	0.001905443	0.192419549	0.225387368	0.187822807	0.876503772	0.812671432	0.001928308	0.001524354	0.169040526	0.011269368	0.037564561	0.026591193	0.009321995	0.118584726	0.280167249	0.938682225	0.211273675	15.1177394	0.106802969	43.29463168	2.744628535	0.706817407	0.496687803	0.496687803	0.334989578	4.827974532	1.986762018	0.902462875	292.6883
690	2	0	pop_healthy_1000_anth	47.87713156	0.20589231	40	33.90915113	0.776783326	0.904766573	15.24909249	0.41	0.65230695	0.30355183	0.032081369	7.850025499	1.331211823	0.482234296	12.08969651	0.79	0.8	0.002	0.16	0.18	0.15	0.92	0.853	0.002024	0.0016	0.135	0.009	0.03	0.028349188	0.012717216	0.087125965	0.350739489	0.873515004	0.261422897	14.967287	0.095064102	43.58225111	2.64791367	0.819254464	0.5	0.5	1.690161111	10.15008193	2	1.075767517	292.6883
691	2	0	pop_healthy_1000_anth	57.01095295	0.195986145	40	35.0279815	0.793505729	1.21619095	17.05557889	0.41	0.713253226	0.378501396	0.03093379	9.655246562	1.443209363	0.562853133	12.85442004	0.79	0.8	0.002	0.16	0.18	0.15	0.92	0.853	0.002024	0.0016	0.135	0.009	0.03	0.027737235	0.01420975	0.09084056	0.411777001	0.915100978	0.470235794	15.2233071	0.099113584	43.98813958	2.566032678	0.578229562	0.5	0.5	1.039771131	21.51272014	2	1.147485555	292.6883
692	2	0	pop_healthy_1000_anth	52.06312503	0.235720933	40	46.85846185	0.986071366	1.012493457	14.86161618	0.41	0.878692605	0.3650846	0.032171825	7.86448442	1.383929226	0.513018716	17.62634757	0.79	0.8	0.002	0.16	0.18	0.15	0.92	0.853	0.002024	0.0016	0.135	0.009	0.03	0.025573918	0.007671816	0.093963731	0.28531659	0.870485629	0.262841181	15.19279446	0.153518105	46.87806691	2.456272037	1.254469668	0.5	0.5	0.872609123	14.59460263	2	0.754885983	292.6883
693	2	0	pop_healthy_1000_anth	56.14275045	0.214075161	40	34.95679783	0.728526565	0.843204047	16.19435676	0.41	0.762598682	0.29190286	0.034531059	8.99007728	1.38196254	0.556370852	12.21981019	0.79	0.8	0.002	0.16	0.18	0.15	0.92	0.853	0.002024	0.0016	0.135	0.009	0.03	0.025035717	0.013054935	0.093435948	0.312229782	0.998531888	0.555208906	14.85855734	0.098462004	44.95041173	2.951745405	1.381167161	0.5	0.5	2.734427033	13.80179697	2	0.737710886	292.6883
694	2	0	pop_healthy_1000_anth	48.39246332	0.220670287	40	32.36984615	0.997071812	1.073252922	14.80869998	0.41	0.690058902	0.281053887	0.031973011	7.84068654	1.40151472	0.555332429	11.77057465	0.79	0.8	0.002	0.16	0.18	0.15	0.92	0.853	0.002024	0.0016	0.135	0.009	0.03	0.023918272	0.01144583	0.089629447	0.349048993	0.946603046	0.255048082	15.1490701	0.125607163	44.6963786	2.570564584	0.396194411	0.5	0.5	1.06267471	36.70102904	2	1.01786688	292.6883
695	2	0	pop_healthy_1000_anth	60.98792485	0.242630371	40	24.63234723	0.873757495	0.973507846	15.85438307	0.41	0.626374608	0.299973232	0.03301815	8.388178685	1.409945792	0.516965628	24.15877657	0.765264067	0.774950954	0.001937377	0.181470611	0.210058856	0.175049046	0.891193597	0.826291454	0.001960626	0.001549902	0.157544142	0.010502943	0.035009809	0.026778807	0.011341804	0.114919584	0.358381833	0.874303571	0.240182772	14.68007223	0.130327405	43.71949796	2.867067672	1.523336727	0.497806419	0.497806419	0.685628896	15.76484702	1.991232834	1.440412198	292.6883
696	2	0	pop_healthy_1000_anth	57.44439308	0.216353375	40	20.42683762	0.855143711	1.187343809	16.29453552	0.41	0.655262647	0.295447244	0.03505069	8.735461483	1.293452845	0.536075325	22.24454243	0.745883677	0.755325242	0.001888313	0.19829265	0.233609709	0.194674758	0.868624029	0.80536554	0.001910973	0.00151065	0.175207282	0.011680485	0.038934952	0.031085563	0.009450675	0.13228552	0.331498492	0.914790992	0.505729921	15.13698041	0.100723951	45.74826704	2.69617213	0.66969931	0.496087768	0.496087768	2.083924547	22.84227469	1.984363835	1.028879755	292.6883
697	2	0	pop_healthy_1000_anth	60.59314134	0.241335981	40	32.59753131	0.804574986	1.39156094	15.84530838	0.41	0.701723882	0.309581222	0.032065189	8.438438874	1.480185456	0.549105123	17.89229741	0.79	0.8	0.002	0.16	0.18	0.15	0.92	0.853	0.002024	0.0016	0.135	0.009	0.03	0.026937946	0.012543332	0.089266733	0.379720088	0.960980732	0.277555716	14.41875193	0.052302924	43.67301572	2.772566491	1.370077399	0.5	0.5	1.51708999	11.62679774	2	1.070087771	292.6883
698	2	0	pop_healthy_1000_anth	60.22416465	0.208629475	40	40.97990689	0.911337463	1.188151071	16.99016357	0.41	1.012341379	0.276845972	0.031547384	9.763390694	1.206224592	0.504786311	12.95693864	0.79	0.8	0.002	0.16	0.18	0.15	0.92	0.853	0.002024	0.0016	0.135	0.009	0.03	0.026001098	0.013195848	0.08614661	0.379802698	0.938967822	0.274758901	14.82823606	0.089497213	43.52374078	2.89142855	0.473676558	0.5	0.5	1.092495047	21.57741799	2	0.866267194	292.6883
699	2	0	pop_healthy_1000_anth	59.03619642	0.234703504	40	36.71007964	0.873035154	1.041244761	15.85986177	0.41	0.554690588	0.311200766	0.033061615	8.653400064	1.30881051	0.513840317	17.98640623	0.79	0.8	0.002	0.16	0.18	0.15	0.92	0.853	0.002024	0.0016	0.135	0.009	0.03	0.025315603	0.012593359	0.084860501	0.405245216	0.92263647	0.301253887	14.7681934	0.096852254	43.5052701	2.674805089	1.001662868	0.5	0.5	1.212215809	7.505076183	2	1.352102299	292.6883
700	2	0	pop_healthy_1000_anth	47.06189866	0.190981075	40	21.33770555	0.869608194	1.366790347	15.6978276	0.41	0.653700535	0.272550618	0.034527223	8.08300127	1.360287393	0.518490509	11.7538423	0.75008126	0.759575959	0.00189894	0.194649178	0.228508849	0.190424041	0.873512353	0.809897867	0.001921727	0.001519152	0.171381637	0.011425442	0.038084808	0.031242962	0.009137619	0.139901518	0.203848392	0.967240321	0.330760219	14.77678587	0.177614296	43.67660669	2.7860323	0.391454837	0.496460009	0.496460009	3.373074358	13.59548834	1.985851586	1.47817474	292.6883
701	2	0	pop_healthy_1000_anth	57.32939825	0.224624387	40	44.59401175	1.05338807	0.922172314	15.9757126	0.41	0.777092754	0.421442765	0.030333741	8.923260331	1.240463801	0.507285841	15.52577861	0.79	0.8	0.002	0.16	0.18	0.15	0.92	0.853	0.002024	0.0016	0.135	0.009	0.03	0.024938352	0.009493773	0.087106723	0.294539238	0.857433258	0.458058275	14.75850541	0.073916123	44.32562395	2.561499024	0.887854654	0.5	0.5	2.131233544	17.77037696	2	0.747519899	292.6883
702	2	0	pop_healthy_1000_anth	55.04584846	0.190521418	40	33.15387346	0.901388432	0.941281119	16.99770869	0.41	0.625694217	0.378772103	0.033435033	9.833167303	1.386924558	0.501683612	13.24235036	0.79	0.8	0.002	0.16	0.18	0.15	0.92	0.853	0.002024	0.0016	0.135	0.009	0.03	0.026390108	0.013252117	0.084490872	0.318399741	0.838983766	0.272018363	15.19310295	0.136159281	43.85847402	2.737923222	0.737432482	0.5	0.5	1.201302967	13.64979691	2	1.107327732	292.6883
703	2	0	pop_healthy_1000_anth	54.6777595	0.225788706	40	34.63832115	0.874239651	0.856768808	15.5616	0.41	0.816058641	0.314559844	0.031670708	8.388698285	1.415214293	0.500311593	14.15718979	0.79	0.8	0.002	0.16	0.18	0.15	0.92	0.853	0.002024	0.0016	0.135	0.009	0.03	0.024400158	0.013093766	0.088493469	0.287761238	0.931515646	0.382093805	14.8258858	0.104531645	45.04557516	2.412907779	1.186810544	0.5	0.5	1.080294376	15.44688441	2	0.863073279	292.6883
704	2	0	pop_healthy_1000_anth	65.49837993	0.24878872	40	55.11470899	0.855088247	1.285777229	16.22556903	0.41	0.842439549	0.32571847	0.03520606	8.768447798	1.404152947	0.508433171	22.62323692	0.79	0.8	0.002	0.16	0.18	0.15	0.92	0.853	0.002024	0.0016	0.135	0.009	0.03	0.0250631	0.005755298	0.092443369	0.418668424	0.904890994	0.335587665	15.02434047	0.18397223	43.26916464	2.341732101	1.577983122	0.5	0.5	1.292458623	5.808926561	2	0.662609123	292.6883
705	2	0	pop_healthy_1000_anth	51.23084009	0.213983353	40	49.45623472	0.789933931	0.867383977	15.47304342	0.41	0.736220054	0.313949005	0.031261089	8.574817341	1.386434621	0.474078773	11.95738248	0.79	0.8	0.002	0.16	0.18	0.15	0.92	0.853	0.002024	0.0016	0.135	0.009	0.03	0.025147248	0.005240982	0.085744058	0.260637772	0.87379251	0.370490958	14.86015971	0.10170139	43.29538437	2.560151188	0.749313697	0.5	0.5	0.699658046	9.142426279	2	0.642881543	292.6883
706	2	0	pop_healthy_1000_anth	65.06985639	0.225044064	40	21.81398254	0.817602753	0.816049134	17.00419762	0.41	0.60004451	0.28847377	0.03491279	9.55870715	1.373010849	0.500420473	22.03818397	0.752276103	0.761798585	0.001904496	0.19274407	0.225841698	0.188201415	0.876068373	0.812267741	0.00192735	0.001523597	0.169381273	0.011292085	0.037640283	0.027422881	0.009431049	0.14090367	0.41726353	0.981414348	0.382876252	15.09396501	0.103904755	42.70069688	2.623485621	0.458213173	0.496654648	0.496654648	1.463071766	35.90372733	1.986629505	0.93955285	292.6883
707	2	0	pop_healthy_1000_anth	65.84868076	0.223121287	40	52.76806418	0.693700075	1.241651143	17.17920398	0.41	0.875428428	0.331664307	0.032784046	9.020099783	1.347793702	0.486791363	20.33581957	0.79	0.8	0.002	0.16	0.18	0.15	0.92	0.853	0.002024	0.0016	0.135	0.009	0.03	0.022631871	0.006272339	0.085680141	0.235174342	0.911599649	0.313540545	15.27482603	0.084274569	45.16682734	2.359794547	1.510215107	0.5	0.5	0.549284945	24.26259092	2	1.091907532	292.6883
708	2	0	pop_healthy_1000_anth	54.5097534	0.227054663	40	58.7312771	1.052329201	1.078146884	15.49429768	0.41	0.792214453	0.332432579	0.033851995	8.126889241	1.388557945	0.504949118	15.71517387	0.79	0.8	0.002	0.16	0.18	0.15	0.92	0.853	0.002024	0.0016	0.135	0.009	0.03	0.023074928	0.004543373	0.096610696	0.33462403	0.88986685	0.253172218	14.64488885	0.11704051	44.95347539	2.222424738	2.445093429	0.5	0.5	1.329129642	7.281745253	2	0.995364112	292.6883
709	2	0	pop_healthy_1000_anth	61.34322212	0.241221978	40	41.56616834	0.664772879	1.039030494	15.94684799	0.41	0.615488288	0.155436375	0.034218377	8.467406084	1.438726881	0.524829602	17.21719793	0.79	0.8	0.002	0.16	0.18	0.15	0.92	0.853	0.002024	0.0016	0.135	0.009	0.03	0.026759039	0.010591353	0.08909689	0.344131417	0.870785926	0.515169631	15.07499162	0.144275888	45.14357849	2.785539317	0.756922844	0.5	0.5	1.369827019	24.57281758	2	1.169788205	292.6883
710	2	0	pop_healthy_1000_anth	68.11950979	0.240553194	40	24.32582842	0.813609258	1.024892103	16.8279105	0.41	0.683864415	0.314921835	0.032935771	9.517718856	1.280968789	0.550967991	23.62641737	0.763851526	0.773520533	0.001933801	0.182696686	0.211775361	0.176479467	0.889548613	0.824766268	0.001957007	0.001547041	0.158831521	0.010588768	0.035295893	0.027913372	0.010416867	0.116078747	0.445060326	0.999094672	0.323734018	14.95983746	0.153860008	45.61758834	2.893291534	1.139114268	0.497681155	0.497681155	1.344433469	24.53136121	1.990732186	0.589734263	292.6883
711	2	0	pop_healthy_1000_anth	56.66917713	0.204952946	40	50.31978765	1.260078308	0.762312591	16.6282433	0.41	0.594124702	0.449800934	0.031537563	9.824944187	1.363655941	0.530812688	14.00784123	0.79	0.8	0.002	0.16	0.18	0.15	0.92	0.853	0.002024	0.0016	0.135	0.009	0.03	0.027053654	0.005338718	0.088730524	0.486906938	0.830616763	0.554516101	15.23517899	0.152060005	43.7897889	2.385134952	0.92695401	0.5	0.5	1.083093457	11.33136314	2	0.85397261	292.6883
712	2	0	pop_healthy_1000_anth	57.68413261	0.203606216	40	22.21492887	0.903859643	1.046784985	16.83188156	0.41	0.675182488	0.29911765	0.029808995	9.337441412	1.378717227	0.569519217	17.16767108	0.754123797	0.763669668	0.001909174	0.191140285	0.223596398	0.186330332	0.878220118	0.814262784	0.001932084	0.001527339	0.167697299	0.01117982	0.037266066	0.027465176	0.01028694	0.137365083	0.324902084	0.93922222	0.25215781	15.10286748	0.10077056	46.67968406	2.628218303	1.046422277	0.496818501	0.496818501	1.200959229	6.969498798	1.987284384	1.126158103	292.6883
713	2	0	pop_healthy_1000_anth	68.68469348	0.238317222	40	46.08609521	1.141422712	1.267866549	16.97666067	0.41	0.944398461	0.4222294	0.035153258	9.218591474	1.298320555	0.474146954	23.9425314	0.79	0.8	0.002	0.16	0.18	0.15	0.92	0.853	0.002024	0.0016	0.135	0.009	0.03	0.025497953	0.009374585	0.081163078	0.311632004	0.891079255	0.32628723	14.90509679	0.1481972	46.43258548	2.206358353	0.789009799	0.5	0.5	2.519009571	20.89816392	2	0.655389772	292.6883
714	2	0	pop_healthy_1000_anth	58.69364028	0.202643809	40	34.50137757	0.847778997	1.076001803	17.01879679	0.41	0.680526672	0.359362481	0.030091726	10.30687639	1.303284963	0.565204072	9.553824425	0.79	0.8	0.002	0.16	0.18	0.15	0.92	0.853	0.002024	0.0016	0.135	0.009	0.03	0.026822123	0.013641569	0.088921918	0.438403452	0.810705851	0.39065237	14.55943949	0.10739871	44.15251378	2.817289963	0.686391698	0.5	0.5	1.171610367	10.96805213	2	1.498704614	292.6883
715	2	0	pop_healthy_1000_anth	49.7927731	0.213790666	40	52.6713814	1.287014045	0.948966117	15.26120363	0.41	0.735167797	0.296632516	0.032826203	9.093926813	1.483523162	0.50574382	10.47571234	0.79	0.8	0.002	0.16	0.18	0.15	0.92	0.853	0.002024	0.0016	0.135	0.009	0.03	0.028708889	0.006325491	0.090286714	0.201882798	0.792269777	0.38967409	15.17201639	0.102252832	44.46922027	2.19812229	1.414383106	0.5	0.5	0.452317221	9.656894023	2	1.019327713	292.6883
716	2	0	pop_healthy_1000_anth	51.50613153	0.22082702	40	57.12880535	1.228658599	0.957647752	15.27226181	0.41	0.773412746	0.235801702	0.034936469	7.496281868	1.242466263	0.489917722	19.16247879	0.79	0.8	0.002	0.16	0.18	0.15	0.92	0.853	0.002024	0.0016	0.135	0.009	0.03	0.02807965	0.00554895	0.091640341	0.437679961	0.940373913	0.319520229	15.11998557	0.12860955	45.92352847	2.13728541	1.338527863	0.5	0.5	0.774750775	14.19692567	2	1.258020668	292.6883
717	2	0	pop_healthy_1000_anth	55.83538315	0.210626311	40	30.81649071	0.852320218	0.875136386	16.28165092	0.41	0.790546028	0.310993594	0.033726385	9.436708013	1.370619684	0.543766957	13.44529037	0.79	0.8	0.002	0.16	0.18	0.15	0.92	0.853	0.002024	0.0016	0.135	0.009	0.03	0.025774905	0.01385282	0.091364355	0.259061311	0.857990395	0.466960215	15.0446885	0.147007136	44.6820815	2.954033057	1.311383377	0.5	0.5	0.981697641	15.27316286	2	0.690203195	292.6883
718	2	0	pop_healthy_1000_anth	56.51614036	0.20553011	40	41.7090769	0.781783783	1.251099112	16.58244327	0.41	1.053722742	0.294232621	0.0303508	9.390967793	1.468722021	0.503802942	9.369192541	0.79	0.8	0.002	0.16	0.18	0.15	0.92	0.853	0.002024	0.0016	0.135	0.009	0.03	0.025878491	0.012041617	0.089884252	0.211864111	0.922598859	0.422371122	15.14633372	0.071704032	44.78626151	2.498204879	1.20190775	0.5	0.5	0.978889219	12.07180816	2	2.055700467	292.6883
719	2	0	pop_healthy_1000_anth	63.33992726	0.233194383	40	44.82541763	0.864390302	0.937997649	16.48085497	0.41	0.873386945	0.368997279	0.033560024	9.740129526	1.389383805	0.511429286	15.57785199	0.79	0.8	0.002	0.16	0.18	0.15	0.92	0.853	0.002024	0.0016	0.135	0.009	0.03	0.025792019	0.010479109	0.086646203	0.321966862	0.857092062	0.565828124	15.46662511	0.081576065	44.02173352	2.365222567	1.799810519	0.5	0.5	1.86701923	16.62782288	2	1.330944294	292.6883
720	2	0	pop_healthy_1000_anth	63.30525253	0.230978087	40	43.74251296	1.139672253	0.831322299	16.55520193	0.41	0.857285397	0.359080257	0.031224643	9.615476908	1.309523542	0.466804656	16.92506842	0.79	0.8	0.002	0.16	0.18	0.15	0.92	0.853	0.002024	0.0016	0.135	0.009	0.03	0.025954409	0.011234981	0.08971054	0.360747317	0.905449011	0.169712653	15.03077343	0.112491336	44.59094082	2.786470123	2.058093248	0.5	0.5	1.745556782	18.09395942	2	1.307774298	292.6883
721	2	0	pop_healthy_1000_anth	59.1886729	0.215980849	40	54.13060982	1.000787194	0.926428899	16.55433269	0.41	0.607544541	0.46066827	0.031539698	8.967872542	1.30064539	0.508385341	20.44893144	0.79	0.8	0.002	0.16	0.18	0.15	0.92	0.853	0.002024	0.0016	0.135	0.009	0.03	0.025167741	0.005514085	0.088718875	0.28043957	0.898583607	0.417477515	14.90429417	0.133650462	43.82037919	2.199999038	1.05836006	0.5	0.5	0.812907618	11.79882483	2	0.699135205	292.6883
722	2	0	pop_healthy_1000_anth	66.16513683	0.23553361	40	42.24112407	0.808901799	1.275358408	16.76054602	0.41	0.804316825	0.320141279	0.032859873	8.825473651	1.48077468	0.466949589	21.50297988	0.79	0.8	0.002	0.16	0.18	0.15	0.92	0.853	0.002024	0.0016	0.135	0.009	0.03	0.026370969	0.011286936	0.087084991	0.269114645	0.883887711	0.330819772	15.14275446	0.154161	44.68455324	2.53051656	0.601916535	0.5	0.5	1.998013612	8.691421959	2	1.046419112	292.6883
723	2	0	pop_healthy_1000_anth	54.86364026	0.203965935	40	21.53359408	1.224996657	1.236581865	16.40074175	0.41	0.697666815	0.279813034	0.038100999	8.830927756	1.386200281	0.550246217	19.16958053	0.750983979	0.760490106	0.001901225	0.193865624	0.227411873	0.189509894	0.874563622	0.810872575	0.00192404	0.00152098	0.170558905	0.011370594	0.037901979	0.024900669	0.00966432	0.136497191	0.423157152	0.980601543	0.597370909	15.16710115	0.09369064	44.69283243	2.624450274	0.956632427	0.496540062	0.496540062	0.954970626	14.54674869	1.986171537	1.661251637	292.6883
724	2	0	pop_healthy_1000_anth	51.78691638	0.222202608	40	57.42802573	0.650308447	1.154400044	15.26635828	0.41	0.840775025	0.277839101	0.032244678	7.925584427	1.306533816	0.47900865	14.10499191	0.79	0.8	0.002	0.16	0.18	0.15	0.92	0.853	0.002024	0.0016	0.135	0.009	0.03	0.026343541	0.005084033	0.08669542	0.40080876	0.879800074	0.591274168	15.29762078	0.108889192	42.83576107	2.234963859	0.542926636	0.5	0.5	0.777640937	32.18307583	2	1.780921513	292.6883
725	2	0	pop_healthy_1000_anth	53.74031573	0.198253464	40	46.42838001	0.911635762	0.911763142	16.46416517	0.41	0.852149689	0.298955042	0.035007023	8.903289047	1.334182706	0.520562507	11.4777555	0.79	0.8	0.002	0.16	0.18	0.15	0.92	0.853	0.002024	0.0016	0.135	0.009	0.03	0.024591817	0.00910653	0.094972588	0.38223899	0.916533814	0.384544305	14.73564226	0.105339432	45.08742129	2.710291608	1.237449979	0.5	0.5	0.936012889	21.45022416	2	0.9794641	292.6883
726	2	0	pop_healthy_1000_anth	67.32527821	0.213963557	40	39.87712202	0.959612856	0.943472941	17.7385932	0.41	0.896147462	0.255877509	0.032953761	10.63741471	1.266984652	0.529771132	17.04223629	0.79	0.8	0.002	0.16	0.18	0.15	0.92	0.853	0.002024	0.0016	0.135	0.009	0.03	0.026922231	0.014023936	0.090408851	0.385957746	0.842171524	0.509906427	15.38622563	0.138111485	44.81904706	2.744708622	1.169468255	0.5	0.5	0.47967388	16.66540285	2	0.732620791	292.6883
727	2	0	pop_healthy_1000_anth	61.31852125	0.226647964	40	45.7651296	0.853717703	0.956555018	16.44825861	0.41	0.985075579	0.363464446	0.031302071	9.354436478	1.28531729	0.508068127	16.08457448	0.79	0.8	0.002	0.16	0.18	0.15	0.92	0.853	0.002024	0.0016	0.135	0.009	0.03	0.0266527	0.009135005	0.079596552	0.432136682	0.903285425	0.707216434	15.10383434	0.138313176	44.476559	2.469001811	0.448035602	0.5	0.5	1.202127722	4.888153052	2	1.098857033	292.6883
728	2	0	pop_healthy_1000_anth	48.73558081	0.221622358	40	33.98772196	1.191406657	1.30474277	14.82915099	0.41	0.732568478	0.336233261	0.034229914	7.573760863	1.453130722	0.531379337	14.54145673	0.79	0.8	0.002	0.16	0.18	0.15	0.92	0.853	0.002024	0.0016	0.135	0.009	0.03	0.02571178	0.011113942	0.084256385	0.213492126	0.881757529	0.338028762	14.74167062	0.128803031	45.07448549	2.9513928	1.743212422	0.5	0.5	1.156809175	11.30749519	2	1.257332956	292.6883
729	2	0	pop_healthy_1000_anth	50.19861387	0.224058703	40	46.62187579	1.466171545	1.036666407	14.96804066	0.41	0.656270644	0.345443306	0.032405399	7.338898758	1.358295152	0.504338356	12.74484667	0.79	0.8	0.002	0.16	0.18	0.15	0.92	0.853	0.002024	0.0016	0.135	0.009	0.03	0.026330197	0.008617526	0.097265746	0.301664557	0.974005638	0.511327843	15.23188806	0.111215178	42.82798969	2.373503631	0.383284581	0.5	0.5	1.747941633	11.73007864	2	0.854490859	292.6883
730	2	0	pop_healthy_1000_anth	52.63950052	0.212107392	40	29.66368311	0.980572193	1.038244273	15.75353339	0.41	0.700267827	0.297191486	0.031319807	8.463724393	1.316045304	0.598001177	14.12735685	0.78845014	0.798430521	0.001996076	0.161345268	0.181883375	0.151569479	0.918195099	0.851326543	0.002020029	0.001596861	0.136412531	0.009094169	0.030313896	0.027154649	0.012433822	0.089930181	0.225872986	0.946931188	0.343452624	14.81336673	0.095034653	43.79831341	2.484372429	0.678036911	0.499862558	0.499862558	2.65349674	10.15591948	1.999450682	1.351485032	292.6883
731	2	0	pop_healthy_1000_anth	59.47796406	0.211486508	40	34.76294684	0.774434223	1.433412998	16.77014101	0.41	0.749539384	0.333948246	0.03253179	9.906779418	1.36190511	0.485225531	14.20562306	0.79	0.8	0.002	0.16	0.18	0.15	0.92	0.853	0.002024	0.0016	0.135	0.009	0.03	0.026880359	0.014206034	0.084384287	0.406562198	0.932347419	0.386198556	14.85179921	0.106718164	45.364602	2.652096398	1.964431123	0.5	0.5	0.291790977	19.88292928	2	0.884023075	292.6883
732	2	0	pop_healthy_1000_anth	53.02650941	0.23192404	40	28.19908165	0.804106601	1.163408785	15.12076054	0.41	0.67931269	0.263011724	0.031063958	7.638322093	1.417980197	0.496835055	15.00169747	0.781700768	0.791595714	0.001978989	0.167203673	0.190085143	0.158404286	0.910335072	0.84403893	0.002002737	0.001583191	0.142563857	0.009504257	0.031680857	0.025403537	0.011114207	0.107757732	0.321988097	0.871044333	0.608544449	15.270865	0.116754637	43.84018022	2.89102786	1.238886503	0.499264025	0.499264025	0.495456101	6.659743248	1.9970585	1.659510135	292.6883
733	2	0	pop_healthy_1000_anth	68.33018432	0.222519737	40	22.57230913	0.760804763	0.8071974	17.52354738	0.41	0.69124705	0.308584476	0.034096885	10.3440927	1.337208683	0.521629627	26.11002491	0.755770725	0.765337443	0.001913344	0.189710763	0.221595069	0.184662557	0.880138059	0.816041048	0.001936304	0.001530675	0.166196302	0.011079753	0.036932511	0.027373385	0.010976252	0.119385059	0.163690437	0.967296419	0.475046274	14.72235601	0.09887391	44.44532665	2.75428226	1.100309693	0.49696455	0.49696455	1.179601496	15.65495845	1.987868105	0.668183882	292.6883
734	2	0	pop_healthy_1000_anth	54.67164158	0.231308213	40	26.14375577	1.098456122	1.35045338	15.37395235	0.41	0.564885789	0.315861907	0.034050903	8.070066202	1.263935672	0.493712407	13.38257084	0.772229141	0.782004194	0.00195501	0.175424977	0.201594968	0.167995806	0.899304823	0.833811971	0.001978471	0.001564008	0.151196226	0.010079748	0.033599161	0.027945664	0.011836892	0.106399167	0.296493923	0.847819262	0.408120441	15.21636528	0.089030422	44.17359785	2.666461806	1.14399891	0.498424082	0.498424082	0.327029219	17.91396979	1.993701468	0.730900254	292.6883
735	2	0	pop_healthy_1000_anth	61.069205	0.209889674	40	55.63640212	0.84759685	1.177579436	17.05750851	0.41	1.017333857	0.421026655	0.030428664	9.848397171	1.303276443	0.446662902	13.9194707	0.79	0.8	0.002	0.16	0.18	0.15	0.92	0.853	0.002024	0.0016	0.135	0.009	0.03	0.026145597	0.005656752	0.097742151	0.535553694	0.938994526	0.342482723	14.77024154	0.076180028	42.27028157	2.182650624	0.923492142	0.5	0.5	0.677763656	9.246469089	2	1.335577418	292.6883
736	2	0	pop_healthy_1000_anth	60.16052097	0.225373125	40	34.7613863	0.922199076	0.884498489	16.33821966	0.41	0.75516043	0.298564295	0.031142286	8.833647286	1.29552322	0.503904644	20.08601264	0.79	0.8	0.002	0.16	0.18	0.15	0.92	0.853	0.002024	0.0016	0.135	0.009	0.03	0.024791617	0.012519099	0.084560148	0.358074624	0.984031972	0.31726906	15.2941801	0.127098462	44.98755217	2.765912757	0.505579352	0.5	0.5	1.537801608	19.43749029	2	1.059542846	292.6883
737	2	0	pop_healthy_1000_anth	56.34493155	0.228459529	40	44.04956666	1.030086445	1.153011098	15.70445209	0.41	0.767432003	0.43617455	0.033013198	7.997038269	1.366660904	0.506752725	11.05958752	0.79	0.8	0.002	0.16	0.18	0.15	0.92	0.853	0.002024	0.0016	0.135	0.009	0.03	0.024950412	0.011224927	0.091884766	0.25803738	0.847199341	0.445924942	14.7940336	0.128565999	43.58427979	2.638083376	1.149172719	0.5	0.5	1.23355788	20.58799529	2	1.000068021	292.6883
738	2	0	pop_healthy_1000_anth	65.62746065	0.240967577	40	48.67867682	0.882195709	1.348623519	16.50302263	0.41	0.562452396	0.22016184	0.032284649	9.511870213	1.326487461	0.465819313	21.82904968	0.79	0.8	0.002	0.16	0.18	0.15	0.92	0.853	0.002024	0.0016	0.135	0.009	0.03	0.027262332	0.007150465	0.085498618	0.251377682	0.827342511	0.65166327	14.97375583	0.10119706	46.30721915	2.354009937	0.618235886	0.5	0.5	2.26341233	22.10205449	2	0.836994178	292.6883
739	2	0	pop_healthy_1000_anth	62.9991449	0.23193918	40	58.0789273	0.920420194	1.367056236	16.48087513	0.41	0.883700365	0.411007953	0.030225518	9.38988652	1.218418966	0.471278286	19.63898564	0.79	0.8	0.002	0.16	0.18	0.15	0.92	0.853	0.002024	0.0016	0.135	0.009	0.03	0.026821865	0.006427916	0.094240607	0.280676344	0.927425538	0.452707519	15.2230009	0.118162833	45.02186201	2.099616283	2.137177134	0.5	0.5	0.510494486	20.61619259	2	1.184503483	292.6883
740	2	0	pop_healthy_1000_anth	58.29299757	0.201438902	40	36.19614529	1.27738015	0.933131312	17.01126153	0.41	0.823032287	0.327690102	0.032175586	10.27907432	1.388785456	0.497651725	7.803399361	0.79	0.8	0.002	0.16	0.18	0.15	0.92	0.853	0.002024	0.0016	0.135	0.009	0.03	0.023910195	0.013724207	0.082401343	0.401467026	0.887117004	0.439231045	15.16444551	0.156485723	43.60058512	2.488019933	1.180433509	0.5	0.5	0.525388803	10.81915638	2	0.835940684	292.6883
741	2	0	pop_healthy_1000_anth	50.68106816	0.219677828	40	54.42006135	0.98574593	0.738758883	15.18902043	0.41	1.165979298	0.374219559	0.034157522	7.780877924	1.313304724	0.494928641	15.66092258	0.79	0.8	0.002	0.16	0.18	0.15	0.92	0.853	0.002024	0.0016	0.135	0.009	0.03	0.024436207	0.005626951	0.087808692	0.262103884	0.906512144	0.384639231	15.15630371	0.127920729	44.48034311	2.38110574	1.88043577	0.5	0.5	4.264872757	11.69302166	2	1.462595297	292.6883
742	2	0	pop_healthy_1000_anth	68.87779655	0.234197107	40	33.63729174	1.130764592	0.922616198	17.14939723	0.41	0.700145287	0.350246621	0.031537801	10.20061773	1.473410298	0.587819251	18.09807243	0.79	0.8	0.002	0.16	0.18	0.15	0.92	0.853	0.002024	0.0016	0.135	0.009	0.03	0.024447074	0.0140524	0.085524495	0.233419987	0.911028879	0.51082934	15.05597109	0.1334895	42.70772506	2.824664616	1.473935533	0.5	0.5	0.836661114	10.66168731	2	1.071154666	292.6883
743	2	0	pop_healthy_1000_anth	59.45775296	0.20859501	40	23.44315645	1.042459401	1.118229548	16.88310372	0.41	0.694195539	0.315000598	0.037644051	9.489172655	1.328519359	0.548587912	18.3385517	0.759783879	0.769401397	0.001923503	0.186227374	0.216718324	0.180598603	0.884811606	0.820374239	0.001946586	0.001538803	0.162538743	0.010835916	0.036119721	0.027185277	0.010697049	0.127487699	0.347296995	0.875868838	0.112497073	15.16432961	0.106960397	45.69659496	3.014965367	0.919829024	0.497320437	0.497320437	1.506362673	7.721481112	1.989290489	1.239335149	292.6883
744	2	0	pop_healthy_1000_anth	65.20303125	0.217700236	40	51.07689093	1.224974663	1.065396994	17.30630859	0.41	0.642296752	0.415195088	0.034009006	10.06265304	1.427828296	0.487020646	15.97570492	0.79	0.8	0.002	0.16	0.18	0.15	0.92	0.853	0.002024	0.0016	0.135	0.009	0.03	0.025181176	0.006022071	0.084736983	0.524852405	0.862881273	0.260103197	14.91481827	0.084911321	44.59601371	2.345478305	1.937796025	0.5	0.5	0.863252098	4.839878289	2	0.776870389	292.6883
745	2	0	pop_healthy_1000_anth	49.37904108	0.221786094	40	26.79271285	1.110894091	0.926816599	14.92121437	0.41	0.667658767	0.272860829	0.03281203	7.553100436	1.361452587	0.552120964	15.44929388	0.775219752	0.78503266	0.001962582	0.172829149	0.197960808	0.16496734	0.902787559	0.837041074	0.001986133	0.001570065	0.148470606	0.00989804	0.032993468	0.027736033	0.010857828	0.106820754	0.371972051	1.001156147	0.413680304	14.9401542	0.135641414	44.99689165	2.742729627	1.299545898	0.498689289	0.498689289	2.882813208	14.11416193	1.994761431	1.04283675	292.6883
746	2	0	pop_healthy_1000_anth	57.18864464	0.235289462	40	33.08439255	1.066647084	0.976258473	15.59027096	0.41	0.610552981	0.332491551	0.034748621	8.361877808	1.44645435	0.530016586	17.36641789	0.79	0.8	0.002	0.16	0.18	0.15	0.92	0.853	0.002024	0.0016	0.135	0.009	0.03	0.024933766	0.012735829	0.086493032	0.431109122	0.876432887	0.340845552	15.44431811	0.090934092	45.20483498	2.936259028	1.096696962	0.5	0.5	0.969333136	10.33602447	2	1.359748933	292.6883
747	2	0	pop_healthy_1000_anth	52.2910273	0.229724956	40	41.45304031	1.044083944	1.10948598	15.08722955	0.41	0.651614554	0.282337217	0.033057587	7.695947227	1.31719841	0.494166529	14.56973455	0.79	0.8	0.002	0.16	0.18	0.15	0.92	0.853	0.002024	0.0016	0.135	0.009	0.03	0.025586924	0.010505815	0.094085901	0.355604864	0.852364762	0.378763269	14.46742611	0.11914832	43.13057022	2.558002585	1.128342201	0.5	0.5	0.572362841	26.36724497	2	0.752007695	292.6883
748	2	0	pop_healthy_1000_anth	57.14347449	0.216171715	40	44.01226419	0.992692885	1.037506833	16.25862774	0.41	0.743391039	0.460748416	0.03154177	9.595947934	1.288535734	0.466720497	13.91025593	0.79	0.8	0.002	0.16	0.18	0.15	0.92	0.853	0.002024	0.0016	0.135	0.009	0.03	0.027181812	0.010868287	0.092779816	0.187743749	0.852896039	0.088928231	14.89078234	0.097312373	42.44229833	2.695448739	1.050912713	0.5	0.5	0.344337152	6.912622348	2	1.057499373	292.6883
749	2	0	pop_healthy_1000_anth	50.44249835	0.210128347	40	51.87050104	0.961223747	0.985634985	15.49372959	0.41	0.450727741	0.288476358	0.033699648	7.986074201	1.38003885	0.447570505	12.0183624	0.79	0.8	0.002	0.16	0.18	0.15	0.92	0.853	0.002024	0.0016	0.135	0.009	0.03	0.02614773	0.007003922	0.091567663	0.321472061	0.926383801	0.32947337	15.14292896	0.146276812	44.70947783	2.476940729	0.857499167	0.5	0.5	0.432354287	17.46483115	2	1.096796397	292.6883
750	2	0	pop_healthy_1000_anth	52.92243079	0.197367634	40	34.02463049	0.962304702	1.163990433	16.37502323	0.41	0.700005305	0.300425052	0.033149172	9.010966792	1.255189075	0.509356929	14.318283	0.79	0.8	0.002	0.16	0.18	0.15	0.92	0.853	0.002024	0.0016	0.135	0.009	0.03	0.02433422	0.014702333	0.087998455	0.350293377	0.810471282	0.367391587	14.76475952	0.123145218	43.09224175	2.642929724	1.85157315	0.5	0.5	0.929712168	17.16533712	2	0.991999294	292.6883
751	2	0	pop_healthy_1000_anth	54.73851755	0.245174542	40	38.55605281	1.161737299	1.157928097	14.94200334	0.41	0.602348937	0.335246306	0.03023726	8.113247779	1.300940948	0.511448485	14.82310428	0.79	0.8	0.002	0.16	0.18	0.15	0.92	0.853	0.002024	0.0016	0.135	0.009	0.03	0.026120787	0.012711477	0.093492822	0.350792644	0.87366565	0.481000001	14.94258212	0.117337782	44.09547674	2.583111016	0.469997962	0.5	0.5	1.393425524	26.48155077	2	0.953933336	292.6883
752	2	0	pop_healthy_1000_anth	63.24262333	0.243107362	40	56.75295299	1.191155798	1.208624357	16.1289421	0.41	0.590100967	0.234926499	0.031130117	9.024810494	1.313017531	0.475871397	23.70333553	0.79	0.8	0.002	0.16	0.18	0.15	0.92	0.853	0.002024	0.0016	0.135	0.009	0.03	0.023635306	0.007367892	0.088002526	0.633582345	0.927236063	0.618583966	15.40356833	0.088013074	43.63009272	2.083646184	1.326269015	0.5	0.5	1.811543635	19.29944778	2	0.778268916	292.6883
753	2	0	pop_healthy_1000_anth	48.45374232	0.202552704	40	30.82657686	1.043788405	0.951485459	15.46659237	0.41	0.774917893	0.349975748	0.032161109	8.237522681	1.174760703	0.46845676	12.64096492	0.79	0.8	0.002	0.16	0.18	0.15	0.92	0.853	0.002024	0.0016	0.135	0.009	0.03	0.027353604	0.01224274	0.085651474	0.340172526	0.964954922	0.423776791	15.03524913	0.139904903	43.89442591	2.737980169	1.533019989	0.5	0.5	1.227495334	6.943762159	2	0.678400558	292.6883
754	2	0	pop_healthy_1000_anth	55.79661853	0.215332105	40	33.88667809	1.170905073	1.196514861	16.0971706	0.41	0.720382024	0.337957132	0.031380504	8.764973966	1.393598072	0.513273628	15.44151816	0.79	0.8	0.002	0.16	0.18	0.15	0.92	0.853	0.002024	0.0016	0.135	0.009	0.03	0.02586406	0.014008592	0.091844052	0.333321965	0.935363573	0.515619071	15.15654717	0.133620883	44.59387501	3.012713991	0.454147785	0.5	0.5	0.879226478	22.48889667	2	1.335850415	292.6883
755	2	0	pop_healthy_1000_anth	57.88705273	0.20042179	40	56.16200032	0.934599835	0.718155469	16.99488582	0.41	0.745450828	0.260705534	0.032195844	10.16655677	1.264831498	0.483959932	13.62647025	0.79	0.8	0.002	0.16	0.18	0.15	0.92	0.853	0.002024	0.0016	0.135	0.009	0.03	0.024893952	0.005994438	0.095696259	0.178712091	0.916837771	0.161648598	15.13335819	0.090542446	42.95277555	2.166983859	0.462037363	0.5	0.5	1.688580233	17.01657195	2	1.154498291	292.6883
756	2	0	pop_healthy_1000_anth	56.41577366	0.222699622	40	24.29879356	1.068923617	1.199575396	15.91624201	0.41	0.648619885	0.289266335	0.033273425	8.483574549	1.341741188	0.484923295	21.53098411	0.76372694	0.77339437	0.001933486	0.182804826	0.211926756	0.17660563	0.889403525	0.824631747	0.001956688	0.001546789	0.158945067	0.010596338	0.035321126	0.027201666	0.010804442	0.115826307	0.26125522	0.881004912	0.31176217	14.84086801	0.153294063	44.02069925	2.60948075	0.562774826	0.497670107	0.497670107	1.174164099	10.25410147	1.990688029	0.941026987	292.6883
757	2	0	pop_healthy_1000_anth	58.88468008	0.221232976	40	40.09527245	1.048636371	0.814163009	16.31459243	0.41	0.644952842	0.339241065	0.032742553	8.698766486	1.455575843	0.508216695	15.08800555	0.79	0.8	0.002	0.16	0.18	0.15	0.92	0.853	0.002024	0.0016	0.135	0.009	0.03	0.025867029	0.012972453	0.091413634	0.323878014	0.922759126	0.40584482	14.96934581	0.135573285	44.21931681	2.781133695	0.501612751	0.5	0.5	0.983986144	21.25963881	2	0.799142812	292.6883
758	2	0	pop_healthy_1000_anth	52.36448595	0.234155212	40	37.81585085	1.127261817	0.815621058	14.95431442	0.41	0.937967741	0.222114122	0.031014134	7.924524293	1.394400018	0.509660688	13.43089339	0.79	0.8	0.002	0.16	0.18	0.15	0.92	0.853	0.002024	0.0016	0.135	0.009	0.03	0.025248857	0.012526772	0.084616677	0.372665855	0.853144498	0.537879209	15.00373105	0.104697317	44.86571331	2.733804582	0.859828402	0.5	0.5	0.618788109	5.763865556	2	1.147206208	292.6883
759	2	0	pop_healthy_1000_anth	57.16306999	0.221212217	40	30.24664943	1.131632912	1.013920581	16.07508278	0.41	0.747218861	0.31333588	0.033168273	8.676245538	1.272486367	0.518029052	16.87937413	0.79	0.8	0.002	0.16	0.18	0.15	0.92	0.853	0.002024	0.0016	0.135	0.009	0.03	0.026431423	0.013488856	0.093095756	0.301255836	0.873371891	0.33331845	14.97257022	0.133485065	44.25357908	2.440184247	0.955765559	0.5	0.5	1.575896229	9.283674574	2	0.985130047	292.6883
760	2	0	pop_healthy_1000_anth	51.17770566	0.202137459	40	35.80641008	0.80630926	0.810523977	15.91171552	0.41	0.931866988	0.339882392	0.030600819	7.810511954	1.381996894	0.471426365	10.80895939	0.79	0.8	0.002	0.16	0.18	0.15	0.92	0.853	0.002024	0.0016	0.135	0.009	0.03	0.028007571	0.013371908	0.087095637	0.3742566	0.904307253	0.428418485	15.24127442	0.072581239	44.59513883	2.744583707	0.779436424	0.5	0.5	1.562775862	31.33287163	2	1.001787767	292.6883
761	2	0	pop_healthy_1000_anth	60.01597596	0.22078173	40	27.20484579	0.883017181	0.807366992	16.48738847	0.41	0.722483599	0.302318663	0.028681277	9.104804753	1.286653421	0.50132041	19.85733557	0.777118998	0.786955947	0.00196739	0.171180617	0.195652864	0.163044053	0.904999339	0.839091779	0.001990999	0.001573912	0.146739648	0.009782643	0.032608811	0.025720591	0.010609858	0.098419585	0.294247452	0.931510244	0.473099707	15.19192774	0.121686818	45.19092803	2.893266949	1.067876567	0.498857714	0.498857714	0.516988116	9.576246397	1.995434581	1.46188846	292.6883
762	2	0	pop_healthy_1000_anth	60.76801031	0.247210443	40	29.72951329	0.998179908	1.090427032	15.67848526	0.41	0.71763764	0.328069038	0.035247492	8.468041103	1.38165226	0.51817825	20.85727873	0.788753507	0.798737729	0.001996844	0.161081947	0.181514726	0.151262271	0.918548388	0.851654103	0.002020806	0.001597475	0.136136044	0.009075736	0.030252454	0.025327109	0.012262607	0.090858974	0.416776769	0.788834361	0.419329857	15.08969307	0.121070647	42.93750411	3.01678601	1.07670185	0.499889461	0.499889461	1.245122158	14.79828625	1.999558205	1.268976631	292.6883
763	2	0	pop_healthy_1000_anth	68.42998628	0.244142723	40	29.87759959	1.024570596	1.048832127	16.74176859	0.41	0.784794553	0.327146867	0.030025588	9.658340991	1.343581073	0.482717507	23.85000657	0.789435938	0.799428798	0.001998572	0.160489602	0.180685442	0.150571202	0.919343118	0.852390956	0.002022555	0.001598858	0.135514082	0.009034272	0.03011424	0.026215039	0.014415894	0.094497058	0.252495766	0.860648681	0.38885927	14.88857578	0.112838161	44.07554188	2.803895276	1.187695011	0.499949979	0.499949979	0.917638274	19.08408456	1.999800079	0.852637517	292.6883
764	2	0	pop_healthy_1000_anth	57.65542261	0.249618157	40	49.3518649	0.812361007	0.74586735	15.19784439	0.41	0.837908132	0.324924425	0.033753956	8.195866187	1.306007684	0.496690851	19.24112727	0.79	0.8	0.002	0.16	0.18	0.15	0.92	0.853	0.002024	0.0016	0.135	0.009	0.03	0.026472074	0.007347042	0.087006289	0.253559681	0.920903779	0.310791206	15.1919258	0.077135218	44.22716498	2.327974508	0.926850315	0.5	0.5	0.926419026	15.34932562	2	1.290913993	292.6883
765	2	0	pop_healthy_1000_anth	45.66253295	0.203744913	40	25.59348844	1.174401147	1.01418054	14.97051056	0.41	0.638265782	0.29347025	0.032521853	7.475133224	1.293879157	0.468418026	10.94490831	0.769693326	0.779436279	0.001948591	0.177626046	0.204676465	0.170563721	0.896351721	0.831073933	0.001971974	0.001558873	0.153507349	0.010233823	0.034112744	0.025670362	0.011109894	0.105099976	0.177931733	0.988514845	0.253812669	14.60725875	0.119392407	43.40882137	2.653134724	1.005641059	0.498199206	0.498199206	0.952354937	8.282831405	1.992802698	1.239645573	292.6883
766	2	0	pop_healthy_1000_anth	50.75253042	0.206790296	40	52.26986685	1.047696479	1.348140364	15.66620382	0.41	0.809214736	0.360536915	0.032540352	8.034807973	1.335549885	0.517301889	15.65441461	0.79	0.8	0.002	0.16	0.18	0.15	0.92	0.853	0.002024	0.0016	0.135	0.009	0.03	0.026485779	0.007615632	0.101963136	0.329865467	0.910358109	0.516874106	15.20489242	0.116042032	42.29061269	2.274496723	1.125573277	0.5	0.5	1.277354404	17.14803294	2	0.786942262	292.6883
767	2	0	pop_healthy_1000_anth	53.33478373	0.229811538	40	23.1716726	1.273460883	0.960599034	15.23418953	0.41	0.638789004	0.262517701	0.033970738	7.729532209	1.408663767	0.530622766	16.90565482	0.758532791	0.768134472	0.001920336	0.18731331	0.218238633	0.181865528	0.883354643	0.819023381	0.00194338	0.001536269	0.163678975	0.010911932	0.036373106	0.026910289	0.009684713	0.128094561	0.220613516	0.945060202	0.355209196	15.63041134	0.129938388	46.01038147	2.782420715	0.673809473	0.49720949	0.49720949	0.877078916	28.25600354	1.988847065	1.211892436	292.6883
768	2	0	pop_healthy_1000_anth	64.14581868	0.237933297	40	23.48788751	1.239579395	0.752124888	16.41937287	0.41	0.652209551	0.298880016	0.03100063	8.912910205	1.267399261	0.531670449	26.22836555	0.759990015	0.769610142	0.001924025	0.18604845	0.21646783	0.180389858	0.885051663	0.820596814	0.001947114	0.00153922	0.162350872	0.010823391	0.036077972	0.026166656	0.010569403	0.11398349	0.324931381	0.820980656	0.400057566	14.5597265	0.123543582	45.07252319	2.718323486	0.608280853	0.497338717	0.497338717	0.732676129	11.30828142	1.98936355	1.141621113	292.6883
769	2	0	pop_healthy_1000_anth	57.10739102	0.205535783	40	38.61265385	0.978736875	0.819933483	16.6687272	0.41	0.735022604	0.379697209	0.033694631	10.35109167	1.373343449	0.534784139	14.64419685	0.79	0.8	0.002	0.16	0.18	0.15	0.92	0.853	0.002024	0.0016	0.135	0.009	0.03	0.024441354	0.013355701	0.089255095	0.392462419	0.915189367	0.435804306	15.01367458	0.075226737	44.86239652	2.700528231	0.597520863	0.5	0.5	1.375221263	12.24800399	2	0.873903688	292.6883
770	2	0	pop_healthy_1000_anth	60.61829667	0.231193165	40	30.58032128	1.130041288	1.033602476	16.19251728	0.41	0.760342864	0.330873781	0.032052019	8.901832764	1.363502392	0.510477372	19.9731664	0.79	0.8	0.002	0.16	0.18	0.15	0.92	0.853	0.002024	0.0016	0.135	0.009	0.03	0.025796426	0.013760618	0.095739809	0.192735203	0.883273578	0.328853216	14.57722661	0.142603716	46.12205335	2.526265753	0.422356591	0.5	0.5	1.207656699	20.13729509	2	0.581942054	292.6883
771	2	0	pop_healthy_1000_anth	57.36653333	0.24019672	40	47.53018924	1.464953455	0.941445303	15.45417289	0.41	0.746134067	0.26764435	0.035315016	7.626728635	1.270610971	0.457720793	18.64737313	0.79	0.8	0.002	0.16	0.18	0.15	0.92	0.853	0.002024	0.0016	0.135	0.009	0.03	0.024100998	0.008246676	0.097447165	0.320200238	0.953043002	0.501036967	15.42988376	0.130947125	44.27331007	2.560691848	0.982479321	0.5	0.5	0.626967276	16.51561501	2	1.600502156	292.6883
772	2	0	pop_healthy_1000_anth	61.05622045	0.228834055	40	52.43948223	0.82352102	1.315543338	16.33445429	0.41	1.118620008	0.340595791	0.032339464	9.409851409	1.249318846	0.489158466	15.64633493	0.79	0.8	0.002	0.16	0.18	0.15	0.92	0.853	0.002024	0.0016	0.135	0.009	0.03	0.026294892	0.007318621	0.085593796	0.218584334	0.94929616	0.440975868	15.25386338	0.134524819	44.73754101	2.516703556	0.735890623	0.5	0.5	0.96663686	23.94786017	2	1.376293494	292.6883
773	2	0	pop_healthy_1000_anth	60.96586507	0.237914911	40	27.51911797	1.212047375	1.633622044	16.0078328	0.41	0.704835335	0.297871609	0.035376359	8.847519157	1.422906835	0.532906627	20.84057499	0.778567269	0.788422551	0.001971056	0.169923528	0.193892939	0.161577449	0.906685933	0.840655544	0.001994709	0.001576845	0.145419705	0.009694647	0.03231549	0.023816016	0.01208731	0.097288534	0.405014231	0.988631248	0.213070422	14.92643489	0.152337186	43.42647455	2.86014668	1.191505884	0.498986146	0.498986146	0.702614269	27.78984773	1.995947893	0.838521938	292.6883
774	2	0	pop_healthy_1000_anth	52.15269023	0.199592213	40	59.10701878	1.302204072	1.067685363	16.1646595	0.41	0.732773081	0.423816938	0.030638039	8.333141037	1.28657307	0.483879927	14.88476266	0.79	0.8	0.002	0.16	0.18	0.15	0.92	0.853	0.002024	0.0016	0.135	0.009	0.03	0.024368816	0.00517651	0.097107249	0.525268351	1.007317119	0.336748139	14.51598007	0.137033397	45.38370543	2.215815237	4.047338318	0.5	0.5	0.449875469	13.65485325	2	1.554353202	292.6883
775	2	0	pop_healthy_1000_anth	51.08422319	0.207508702	40	38.99534567	1.154770958	0.732262394	15.69008297	0.41	0.807999307	0.247481089	0.03221638	8.293973044	1.474651801	0.523567385	12.35729334	0.79	0.8	0.002	0.16	0.18	0.15	0.92	0.853	0.002024	0.0016	0.135	0.009	0.03	0.027886349	0.012996583	0.098276208	0.49296558	0.890272438	0.601422688	15.08683934	0.092770201	44.7437914	2.815184287	0.583369304	0.5	0.5	0.811999656	16.16288884	2	0.930237017	292.6883
776	2	0	pop_healthy_1000_anth	62.63195245	0.233862727	40	25.02856363	1.334428213	0.977824499	16.36505503	0.41	0.699433599	0.272842492	0.029679224	8.922499529	1.388776115	0.511784343	23.67960605	0.767089964	0.776799964	0.001942	0.179885745	0.207840044	0.173200036	0.893319958	0.828262961	0.001965304	0.0015536	0.155880033	0.010392002	0.034640007	0.026840999	0.009878119	0.115078107	0.298101303	0.931574381	0.518187165	14.92309471	0.143209133	45.39748678	2.909831984	1.055138234	0.49796834	0.49796834	0.554644059	18.74132165	1.991879987	1.043133769	292.6883
777	2	0	pop_healthy_1000_anth	65.70237403	0.244626052	40	36.37406957	1.051707651	1.125449197	16.38849897	0.41	0.767286849	0.349671034	0.032160306	9.237155333	1.369835848	0.53877518	23.24915858	0.79	0.8	0.002	0.16	0.18	0.15	0.92	0.853	0.002024	0.0016	0.135	0.009	0.03	0.026425218	0.013927418	0.091078454	0.382378319	0.847538193	0.330202952	15.13205722	0.177148875	44.67410372	2.74212956	0.932620917	0.5	0.5	0.813706965	5.190560186	2	2.284014609	292.6883
778	2	0	pop_healthy_1000_anth	45.9520139	0.227225789	40	28.14505779	1.142239006	1.081611191	14.22078152	0.41	0.653787962	0.294699115	0.031215588	6.889986134	1.341950338	0.531186151	14.59633484	0.781451808	0.791343603	0.001978359	0.167419769	0.190387676	0.158656397	0.910045143	0.843770117	0.002002099	0.001582687	0.142790757	0.009519384	0.031731279	0.025849809	0.011649302	0.102199659	0.31692968	0.974853508	0.369161368	14.55491058	0.107157573	42.64875424	2.737742159	0.999994395	0.499241947	0.499241947	1.449427604	25.22890725	1.996970261	0.634716231	292.6883
779	2	0	pop_healthy_1000_anth	66.63287755	0.235600229	40	59.27585077	1.019959037	0.83024727	16.81730614	0.41	0.701573335	0.307399124	0.029485651	10.23237311	1.443762662	0.446119051	23.8327743	0.79	0.8	0.002	0.16	0.18	0.15	0.92	0.853	0.002024	0.0016	0.135	0.009	0.03	0.025345096	0.005509927	0.091338577	0.230875157	1.044929711	0.518200313	14.75864313	0.089205459	43.05276896	2.215695148	0.719423505	0.5	0.5	2.31887325	21.54784096	2	1.049509586	292.6883
780	2	0	pop_healthy_1000_anth	57.47879934	0.223799027	40	43.48010061	0.865366365	1.080068877	16.02598554	0.41	0.917499712	0.339537331	0.034831183	8.591854972	1.397531332	0.488982117	13.81386314	0.79	0.8	0.002	0.16	0.18	0.15	0.92	0.853	0.002024	0.0016	0.135	0.009	0.03	0.026369527	0.010895188	0.089746425	0.384441648	0.914366908	0.430278971	14.806338	0.085612854	44.75857986	2.537268739	1.061265572	0.5	0.5	0.904022186	16.9746787	2	0.862500578	292.6883
781	2	0	pop_healthy_1000_anth	57.48005238	0.221148273	40	58.07437047	1.18750146	1.289778165	16.12192148	0.41	0.744044242	0.231910189	0.033497392	8.690360691	1.394729115	0.50303824	14.5933466	0.79	0.8	0.002	0.16	0.18	0.15	0.92	0.853	0.002024	0.0016	0.135	0.009	0.03	0.028889884	0.004868104	0.097340475	0.500282444	0.969116744	0.39590485	14.7738878	0.096734851	44.82999849	2.047736938	0.580442122	0.5	0.5	0.408317012	20.10627357	2	0.641719471	292.6883
782	2	0	pop_healthy_1000_anth	62.29239533	0.242969641	40	30.20199491	1.251593445	0.977173505	16.01184988	0.41	0.737300121	0.336912869	0.033325118	8.852586971	1.334891429	0.556782035	20.32040597	0.79	0.8	0.002	0.16	0.18	0.15	0.92	0.853	0.002024	0.0016	0.135	0.009	0.03	0.026817716	0.011806392	0.085095063	0.337013661	0.988995534	0.447379201	15.2857796	0.078869065	45.24752033	2.607441885	1.151561011	0.5	0.5	1.292912552	7.033941252	2	0.789218876	292.6883
783	2	0	pop_healthy_1000_anth	52.39736481	0.216786244	40	35.40773046	0.892057667	0.856130527	15.54672305	0.41	0.805329003	0.307869905	0.032118351	8.343465846	1.243626003	0.492689439	10.53779525	0.79	0.8	0.002	0.16	0.18	0.15	0.92	0.853	0.002024	0.0016	0.135	0.009	0.03	0.025273	0.012341849	0.092486889	0.373734826	0.891130659	0.473780061	15.41546789	0.114812791	46.42152697	2.545580024	2.059920597	0.5	0.5	1.85706078	10.30107906	2	0.741386392	292.6883
784	2	0	pop_healthy_1000_anth	53.80858298	0.213712921	40	43.02295699	0.7110475	1.482108821	15.86756872	0.41	0.810103703	0.305897524	0.031580672	8.328437866	1.38621925	0.4958982	10.43323171	0.79	0.8	0.002	0.16	0.18	0.15	0.92	0.853	0.002024	0.0016	0.135	0.009	0.03	0.026124731	0.011767486	0.084841657	0.383320051	0.878948079	0.438935448	15.01892089	0.105131346	43.79958267	2.496138252	1.008526214	0.5	0.5	1.041456873	37.48095631	2	0.944634201	292.6883
785	2	0	pop_healthy_1000_anth	66.53065008	0.239912979	40	42.77240808	1.083822891	1.110537829	16.65267522	0.41	0.850738386	0.338462825	0.029798813	9.363494451	1.248021143	0.52902632	22.96398876	0.79	0.8	0.002	0.16	0.18	0.15	0.92	0.853	0.002024	0.0016	0.135	0.009	0.03	0.025843712	0.010994334	0.086678163	0.356042635	0.885230259	0.52981642	14.90644696	0.128480238	44.7539692	2.553640337	1.310272663	0.5	0.5	2.235556951	26.49901855	2	0.903520598	292.6883
786	2	0	pop_healthy_1000_anth	65.96332016	0.207649927	40	36.96705076	1.28974166	0.998009575	17.82318695	0.41	0.845824959	0.376570151	0.027681083	11.29914778	1.401138913	0.538797989	18.43573912	0.79	0.8	0.002	0.16	0.18	0.15	0.92	0.853	0.002024	0.0016	0.135	0.009	0.03	0.026031743	0.014399145	0.085510496	0.355218211	0.924598687	0.533876008	15.27948242	0.115427035	44.4029569	2.885895049	0.784428586	0.5	0.5	0.842942211	15.90799046	2	0.71743943	292.6883
787	2	0	pop_healthy_1000_anth	61.06347234	0.22533085	40	25.53010639	0.823983393	0.847302777	16.46191748	0.41	0.717725727	0.304375909	0.033877639	9.170964834	1.224631976	0.494350729	20.03530751	0.76940124	0.779140496	0.001947851	0.177879574	0.205031404	0.170859504	0.896011571	0.830758554	0.001971225	0.001558281	0.153773553	0.01025157	0.034171901	0.028048808	0.011461573	0.109979066	0.330137697	0.977719507	0.402329045	14.82401313	0.11348904	44.66851743	2.592848148	0.981528695	0.498173303	0.498173303	1.099123083	5.230850062	1.992699174	1.515443174	292.6883
788	2	0	pop_healthy_1000_anth	55.2397596	0.230079953	40	26.90601671	0.59227401	0.763396773	15.49481873	0.41	0.673889562	0.304502107	0.03573821	8.281256184	1.369364542	0.5334872	16.68666961	0.775741894	0.785561411	0.001963904	0.172375933	0.197326306	0.164438589	0.903395623	0.837604855	0.00198747	0.001571123	0.14799473	0.009866315	0.032887718	0.02692615	0.011237087	0.1081909	0.29348523	0.916311125	0.206039203	15.27416753	0.177492203	42.19646039	2.678145573	0.653181696	0.498735592	0.498735592	0.910120622	19.96652701	1.994946494	0.802592858	292.6883
789	2	0	pop_healthy_1000_anth	46.38059257	0.20791627	40	50.05061337	0.955263224	1.036548616	14.93564246	0.41	0.609364797	0.361137011	0.029830152	6.903314841	1.317644022	0.522681478	9.128016116	0.79	0.8	0.002	0.16	0.18	0.15	0.92	0.853	0.002024	0.0016	0.135	0.009	0.03	0.027453781	0.006693589	0.089985826	0.346781796	0.879968819	0.417310649	14.71106442	0.121845387	43.96943591	2.381297151	3.665277577	0.5	0.5	0.590270618	12.19865031	2	1.043558527	292.6883
790	2	0	pop_healthy_1000_anth	62.78213771	0.247079198	40	54.82656872	1.201009821	1.168352367	15.94042726	0.41	1.011556656	0.404485326	0.030505128	9.152580735	1.320774969	0.418927253	21.029327	0.79	0.8	0.002	0.16	0.18	0.15	0.92	0.853	0.002024	0.0016	0.135	0.009	0.03	0.022931766	0.00520521	0.08836878	0.409287233	0.931792757	0.427557318	15.2988307	0.133969415	46.14310143	2.469278987	0.558404283	0.5	0.5	0.780482125	13.64376386	2	0.721755775	292.6883
791	2	0	pop_healthy_1000_anth	53.93697601	0.243397127	40	59.41850072	1.188359452	0.815688994	14.88625908	0.41	0.685313987	0.376360914	0.03208576	7.654841833	1.33453142	0.436443012	16.62267492	0.79	0.8	0.002	0.16	0.18	0.15	0.92	0.853	0.002024	0.0016	0.135	0.009	0.03	0.027150846	0.005451469	0.083232579	0.285770802	0.911991966	0.528794754	15.16510734	0.111465754	43.86975118	2.154749955	0.715979383	0.5	0.5	0.967333318	24.74626564	2	1.197282559	292.6883
792	2	0	pop_healthy_1000_anth	57.16859366	0.215399164	40	32.32756641	1.134436249	1.028254935	16.29133775	0.41	0.758657839	0.278255837	0.031952843	9.19836348	1.342483481	0.547375177	14.95777684	0.79	0.8	0.002	0.16	0.18	0.15	0.92	0.853	0.002024	0.0016	0.135	0.009	0.03	0.025878958	0.013269111	0.08353813	0.367472367	0.96316825	0.442983691	14.74799972	0.141502686	45.19313101	2.568899077	1.095814873	0.5	0.5	1.931957283	10.50528313	2	1.316376032	292.6883
793	2	0	pop_healthy_1000_anth	58.90460175	0.204057689	40	26.92932207	0.868026018	1.122044123	16.99018589	0.41	0.674247116	0.295664465	0.032965936	9.74876572	1.325534668	0.515186388	16.50271761	0.775849293	0.78567017	0.001964175	0.172282712	0.197195796	0.16432983	0.903520695	0.837720818	0.001987746	0.00157134	0.147896847	0.00985979	0.032865966	0.026400771	0.011823774	0.106177744	0.271946543	1.024708854	0.381826216	14.87099809	0.067287137	46.42913	2.57277692	0.619757384	0.498745116	0.498745116	0.916574106	13.76348546	1.994984559	1.414261046	292.6883
794	2	0	pop_healthy_1000_anth	49.59294975	0.198758991	40	35.82609025	0.711766287	0.709524494	15.79598011	0.41	0.931344657	0.309393578	0.031675892	7.972497329	1.369991299	0.544382912	10.63478795	0.79	0.8	0.002	0.16	0.18	0.15	0.92	0.853	0.002024	0.0016	0.135	0.009	0.03	0.026826789	0.013495099	0.078035595	0.342806886	0.906706036	0.496167338	14.6286172	0.132240998	44.75495178	2.860478159	1.800356115	0.5	0.5	0.514744714	8.605295775	2	1.150627891	292.6883
795	2	0	pop_healthy_1000_anth	61.30613346	0.203268319	40	27.70694038	1.213506339	1.15019004	17.36669252	0.41	0.740576685	0.316560746	0.033559393	10.53626443	1.375947053	0.535640994	16.82883237	0.779432817	0.789299055	0.001973248	0.169172238	0.192841134	0.160700945	0.907693913	0.841590118	0.001996927	0.001578598	0.14463085	0.009642057	0.032140189	0.028301595	0.013351693	0.099592158	0.251421652	1.054116154	0.338643944	15.28911948	0.10537464	43.86613689	2.521655911	1.216286938	0.499062903	0.499062903	1.628613269	13.64625819	1.996254669	1.080463966	292.6883
796	2	0	pop_healthy_1000_anth	59.24609316	0.225980488	40	42.84807612	0.762260823	1.236145166	16.19177227	0.41	0.633031678	0.305341131	0.034518038	9.180019179	1.292357671	0.497608417	20.62729993	0.79	0.8	0.002	0.16	0.18	0.15	0.92	0.853	0.002024	0.0016	0.135	0.009	0.03	0.02448761	0.010829514	0.088032554	0.42724115	0.886760792	0.441561731	14.97272867	0.084259582	45.8347996	2.796121421	0.648773315	0.5	0.5	1.466424543	15.44794271	2	1.063769587	292.6883
797	2	0	pop_healthy_1000_anth	63.19669358	0.234875752	40	27.56054545	0.905750393	1.205981746	16.40318135	0.41	0.688481696	0.3342073	0.031909274	9.131165179	1.347060132	0.524918624	20.54195254	0.77875818	0.788615879	0.00197154	0.169757818	0.193660945	0.161384121	0.906908261	0.840861681	0.001995198	0.001577232	0.145245709	0.009683047	0.032276824	0.029181693	0.012853479	0.099299247	0.468963989	0.951275125	0.494978506	15.31715623	0.112836669	43.71500383	2.722101809	0.5935405	0.499003076	0.499003076	1.069136316	21.63486322	1.996015558	0.929371818	292.6883
798	2	0	pop_healthy_1000_anth	59.94369919	0.241524477	40	52.40472406	0.865094894	1.141462383	15.75401282	0.41	0.532684837	0.322732243	0.032574401	8.548107709	1.381403538	0.500955461	21.2580297	0.79	0.8	0.002	0.16	0.18	0.15	0.92	0.853	0.002024	0.0016	0.135	0.009	0.03	0.026591848	0.006142312	0.075795358	0.405439351	0.89192934	0.498869139	14.67433871	0.118937301	43.95062077	2.420829525	0.482475313	0.5	0.5	1.481401255	10.11747801	2	1.155032784	292.6883
799	2	0	pop_healthy_1000_anth	63.00179561	0.23006717	40	28.9668439	0.607669666	0.935735731	16.54813818	0.41	0.782829286	0.325058584	0.029679726	9.506608268	1.386720427	0.537412412	16.511572	0.785238872	0.795178605	0.001987947	0.164132624	0.185785674	0.154821395	0.914455396	0.847859187	0.002011802	0.001590357	0.139339256	0.009289284	0.030964279	0.027687631	0.013155562	0.09016557	0.330307879	0.911293712	0.387959005	14.88301241	0.165091742	42.46038309	2.641609655	1.089635081	0.499577784	0.499577784	2.154025134	15.75881158	1.998312512	0.751286104	292.6883
800	2	0	pop_healthy_1000_anth	62.65705195	0.220492843	40	35.24545564	0.877991881	1.091639535	16.85728889	0.41	0.689432071	0.40814246	0.029804719	9.989785023	1.30558156	0.491532228	15.18669722	0.79	0.8	0.002	0.16	0.18	0.15	0.92	0.853	0.002024	0.0016	0.135	0.009	0.03	0.028419552	0.012893701	0.088793587	0.483618676	0.937177088	0.40805902	15.10998901	0.091155742	43.63527769	2.880357379	1.303161966	0.5	0.5	0.808573989	29.05623761	2	1.005856857	292.6883
801	2	0	pop_healthy_1000_anth	54.30547944	0.224307231	40	22.01742193	0.874247263	0.772821283	15.55966309	0.41	0.63515922	0.312922272	0.034064354	8.007894375	1.481949575	0.555404264	17.37060495	0.753213619	0.762747969	0.00190687	0.191930312	0.224702437	0.187252031	0.877160164	0.813280022	0.001929752	0.001525496	0.168526828	0.011235122	0.037450406	0.027313421	0.009445347	0.124719254	0.317408469	0.901300639	0.165970759	15.17404591	0.108131543	45.37994376	2.74128775	0.435915715	0.496737786	0.496737786	0.643397571	23.76127592	1.986961789	1.082007361	292.6883
802	2	0	pop_healthy_1000_anth	67.7143052	0.231438656	40	22.93698711	0.913427419	1.066980589	17.10496793	0.41	0.653910722	0.294354756	0.032200644	9.782823001	1.415392821	0.541180863	22.64246022	0.757451282	0.767039273	0.001917598	0.188252052	0.219552872	0.182960727	0.882095164	0.817855625	0.001940609	0.001534079	0.164664654	0.010977644	0.036592145	0.025969927	0.010853241	0.124427196	0.436345042	0.987986674	0.483976118	15.13211516	0.114153213	43.70894159	2.719840647	0.969441419	0.497113582	0.497113582	2.870213252	34.94143227	1.988463746	1.942916795	292.6883
803	2	0	pop_healthy_1000_anth	63.84778208	0.228728289	40	29.06738732	0.968699645	0.957665319	16.7075576	0.41	0.747131166	0.3173442	0.0289363	9.670787848	1.366238108	0.489180696	23.10346156	0.78570221	0.795647808	0.00198912	0.163730451	0.185222631	0.154352192	0.914994979	0.848359475	0.002012989	0.001591296	0.138916973	0.009261132	0.030870438	0.025031956	0.012938594	0.092486911	0.335868469	0.901811894	0.369317038	15.16210617	0.149719751	45.91663341	2.646028738	0.66989668	0.499618872	0.499618872	0.582757886	6.603426966	1.998476733	1.166390109	292.6883
804	2	0	pop_healthy_1000_anth	53.47430493	0.213549307	40	24.34872987	1.072174521	1.179727746	15.82426295	0.41	0.654574711	0.279860623	0.030459935	8.510232318	1.366373963	0.525299557	14.63600307	0.763957063	0.773627406	0.001934069	0.182605081	0.211647113	0.176372594	0.889671517	0.824880222	0.001957277	0.001547255	0.158735335	0.010582356	0.035274519	0.026106725	0.010211608	0.120101246	0.36575382	0.915080452	0.221378981	14.82795619	0.099524139	41.1516559	2.749898138	0.691558673	0.497690514	0.497690514	0.634119502	8.114733456	1.990769592	1.241884477	292.6883
805	2	0	pop_healthy_1000_anth	50.45640737	0.217777504	40	37.18708764	0.748547237	0.993294514	15.22129678	0.41	0.737987435	0.243211203	0.032604556	7.974529194	1.409056513	0.506429839	14.34690996	0.79	0.8	0.002	0.16	0.18	0.15	0.92	0.853	0.002024	0.0016	0.135	0.009	0.03	0.025387082	0.012866879	0.086642914	0.308897531	0.903349135	0.458372106	14.91988878	0.107069472	45.0417019	2.558167134	0.9806038	0.5	0.5	1.076955929	10.90706513	2	0.92808301	292.6883
806	2	0	pop_healthy_1000_anth	60.87117642	0.238092371	40	58.62805201	0.90845021	1.266947087	15.98943463	0.41	0.7223426	0.361561596	0.031971353	8.629767426	1.380823111	0.467579018	20.9320735	0.79	0.8	0.002	0.16	0.18	0.15	0.92	0.853	0.002024	0.0016	0.135	0.009	0.03	0.025800866	0.006501067	0.085648783	0.304832747	0.892876109	0.251700638	15.34286867	0.096838352	43.72504809	2.312066906	0.311034261	0.5	0.5	0.293192477	22.35485006	2	1.273281085	292.6883
807	2	0	pop_healthy_1000_anth	58.87675672	0.22918992	40	21.59162456	1.033754146	0.921745099	16.02780989	0.41	0.676653648	0.283505848	0.034589411	8.356646668	1.431072702	0.493106494	19.58878311	0.751251403	0.760760915	0.001901902	0.193633502	0.227086902	0.189239085	0.874875052	0.811161325	0.001924725	0.001521522	0.170315177	0.011354345	0.037847817	0.03155421	0.009767905	0.143775765	0.430816781	0.97616194	0.07180154	14.9566448	0.145139641	44.67693741	2.673272983	0.806121275	0.496563777	0.496563777	0.84961889	23.631528	1.98626632	1.204920345	292.6883
808	2	0	pop_healthy_1000_anth	58.56841436	0.236912988	40	37.44054799	1.195947836	1.17994257	15.72306819	0.41	0.722232459	0.269963845	0.033527792	8.416953552	1.308566234	0.506761466	13.55038664	0.79	0.8	0.002	0.16	0.18	0.15	0.92	0.853	0.002024	0.0016	0.135	0.009	0.03	0.026214781	0.01278879	0.077754798	0.302690558	0.925972637	0.228584094	15.3339327	0.124982681	45.03602673	2.508724806	0.421939618	0.5	0.5	1.093049513	12.7024815	2	0.994125085	292.6883
809	2	0	pop_healthy_1000_anth	61.13353591	0.224765387	40	46.04912364	1.115200119	0.908500295	16.49206513	0.41	0.659209821	0.333927878	0.032335207	8.871451918	1.343530953	0.53667823	15.63517146	0.79	0.8	0.002	0.16	0.18	0.15	0.92	0.853	0.002024	0.0016	0.135	0.009	0.03	0.025514902	0.008312382	0.091825817	0.455547703	0.899046354	0.412295301	15.24770368	0.117804802	43.85306831	2.336101457	1.289333357	0.5	0.5	0.731900123	11.22831175	2	1.05089471	292.6883
[truncated: 190 more rows]
[truncated: 50 more columns]
